# Supplementary material for: Comparative metatranscriptomics reveals extracellular electron transfer pathways conferring microbial adaptivity to surface redox potential changes
Source: Springer Nature journal article supplement (doi:10.1038/s41396-018-0238-2), 2018-07-26
Supplement: MOESM1 [file 41396_2018_238_MOESM1_ESM-1.pdf]

# **Comparative metatranscriptomics reveals extracellular electron transfer pathways conferring microbial adaptivity to surface redox potential changes**

Shun'ichi Ishii\*, Shino Suzuki\* Aaron Tenney, Kenneth H. Nealson, Orianna Bretschger

\* Corresponding authors

SI, E-mail: sishii@jamstec.go.jp; Tel: +81-88-878-2279; Fax: +81-88-878-2192

SS, E-mail: sisuzuki@jamstec.go.jp; Tel: +81-88-878-2224; Fax: +81-88-878-2192

## **SUPPLEMENTARY INFORMATION**

Table of Contents

|                                    |           |
|------------------------------------|-----------|
| <b>SUPPLEMENTARY FIGURES .....</b> | <b>2</b>  |
| <b>SUPPLEMENTARY TABLES.....</b>   | <b>24</b> |

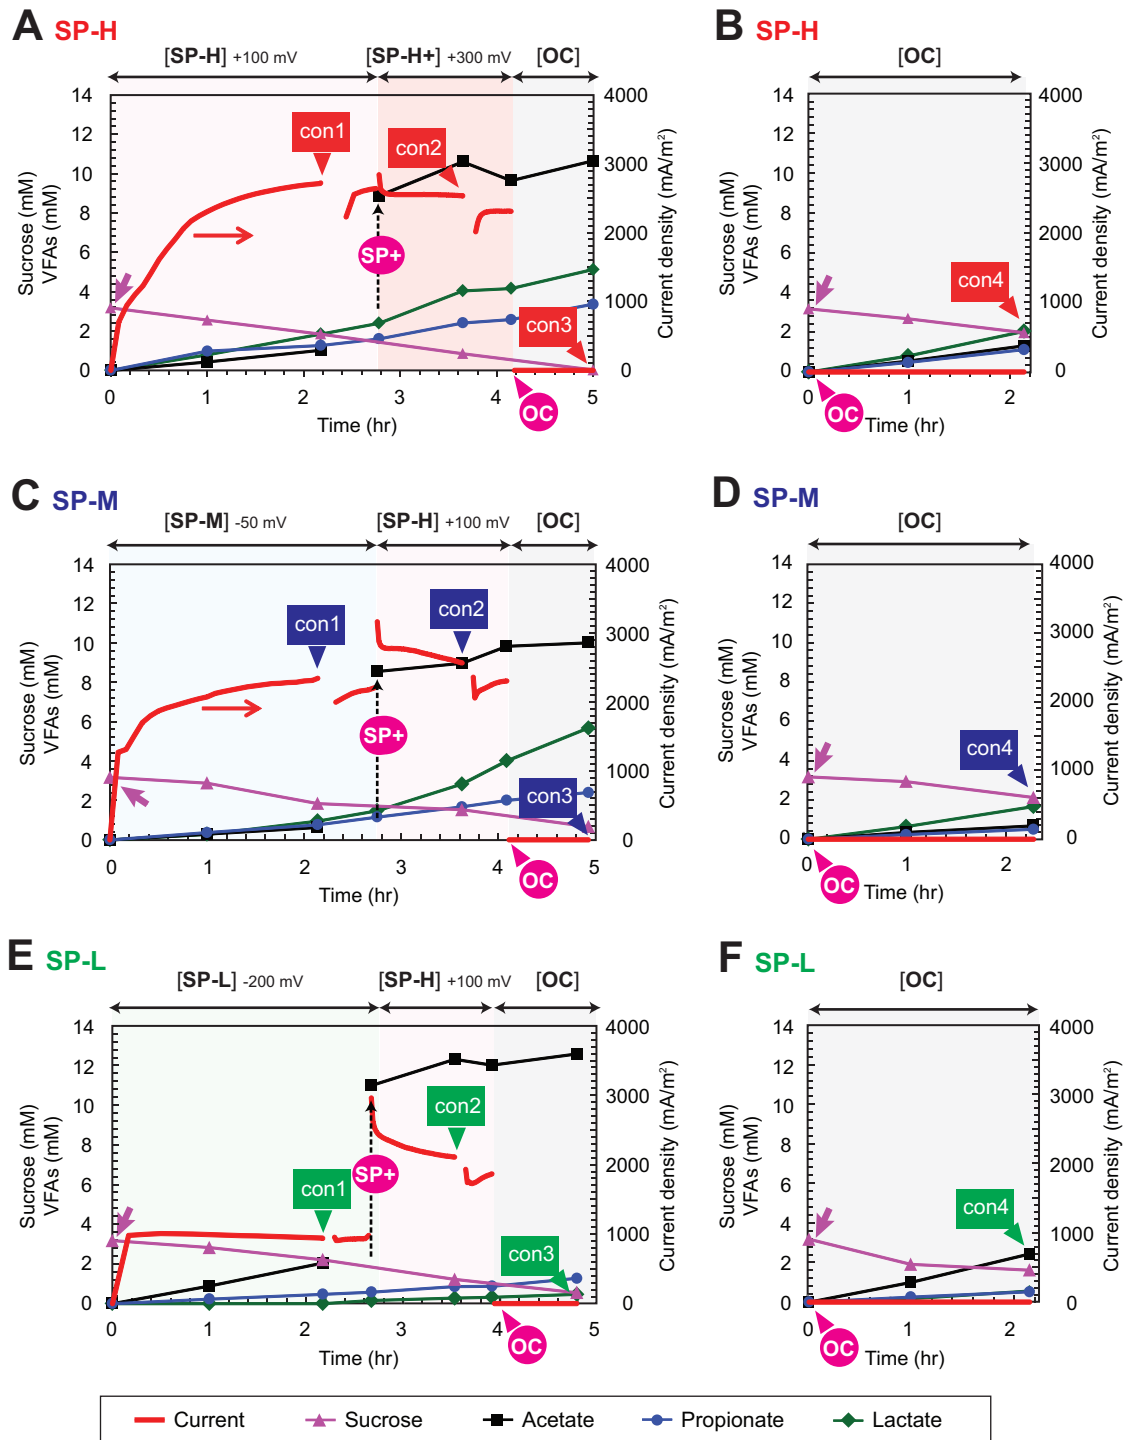

**Supplementary Fig. S1 | Operational data of four sampling conditions (con1 - con4).**

Current and substrate/byproducts responses throughout the different sampling conditions during the sucrose consuming conditions in SP-H (AB), SP-M (CD), and SP-L (EF) communities. The 2.5 mM sucrose was injected at the starting point of batch (purple arrow). Initial three conditions, con1 after SP operation, con2 after SP+ stimulus, and con3 after OC stimulus (red arrowhead) were harvested in first batch (A, C, E), subsequently con5 samples (acetate/propionate consuming EET condition, stimulus AcPro) were collected in second batch (data not shown). In third batch (B, D, F), con4 samples (sucrose-consuming OC as similar substrate condition to con1) were collected after OC stimulus. As for SP+ stimulus, anode surface potentials were changed to more positive potentials and ~9 mM of acetate was injected (dashed arrow) at 2.8 hr (A, C, E).

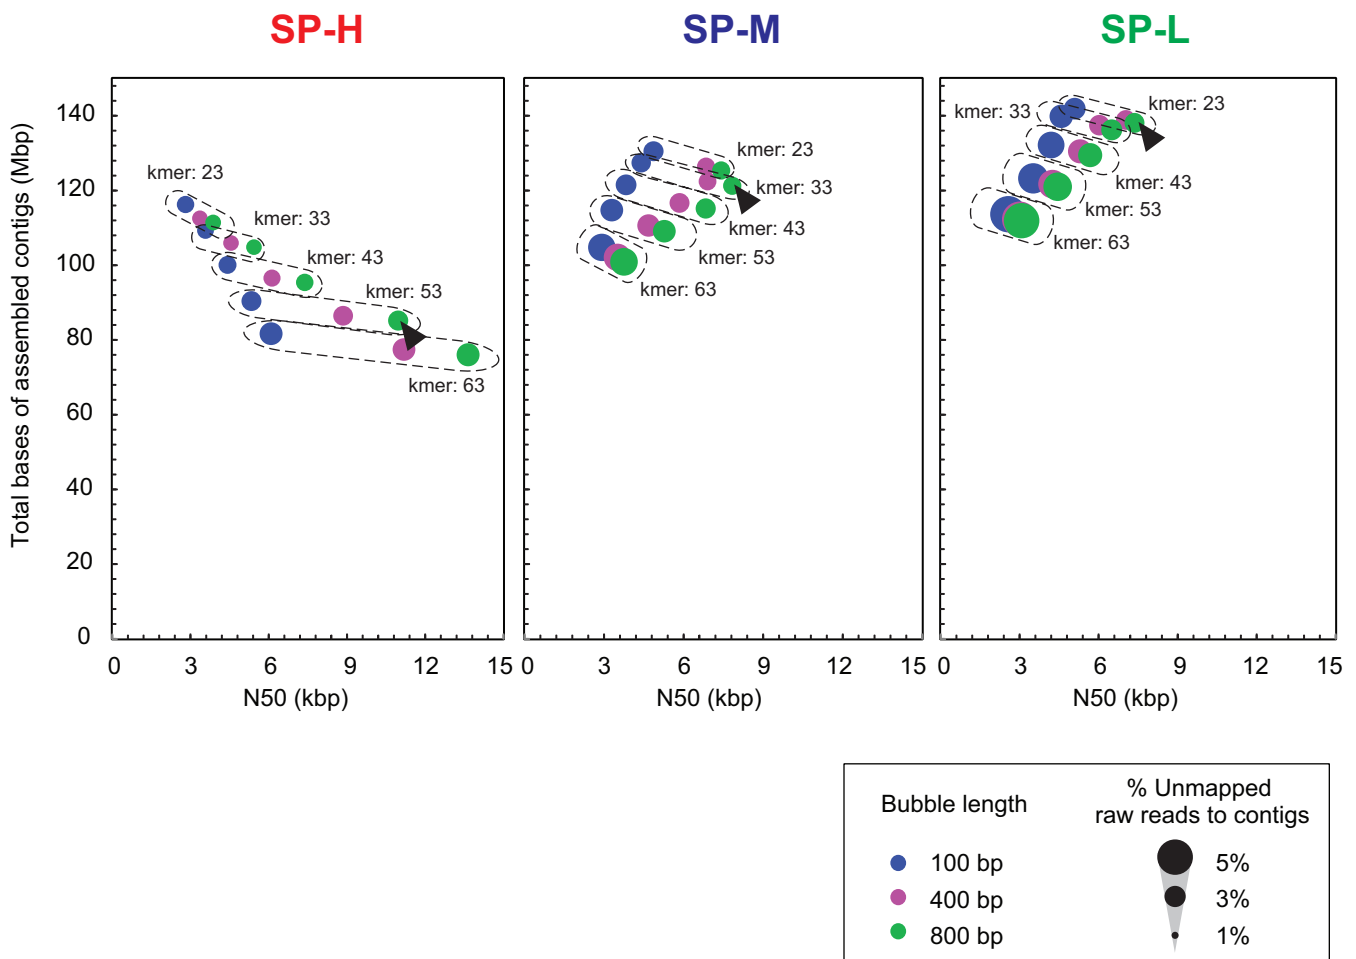

**Supplementary Fig. S2 | Metagenomic assembly metrics with the various parameters on *de novo* assembly software.**

Three metagenomic assembly metrics, total bases (y-axis), N50 (x-axis), and % unmapped raw reads back to the assembled contigs (size of bubble), are shown with different parameters of both kmer size (dashed line) and bubble length (color) in CLC *de novo* assembly cell 4.0. Filled arrowhead indicates an assembly used in this study.

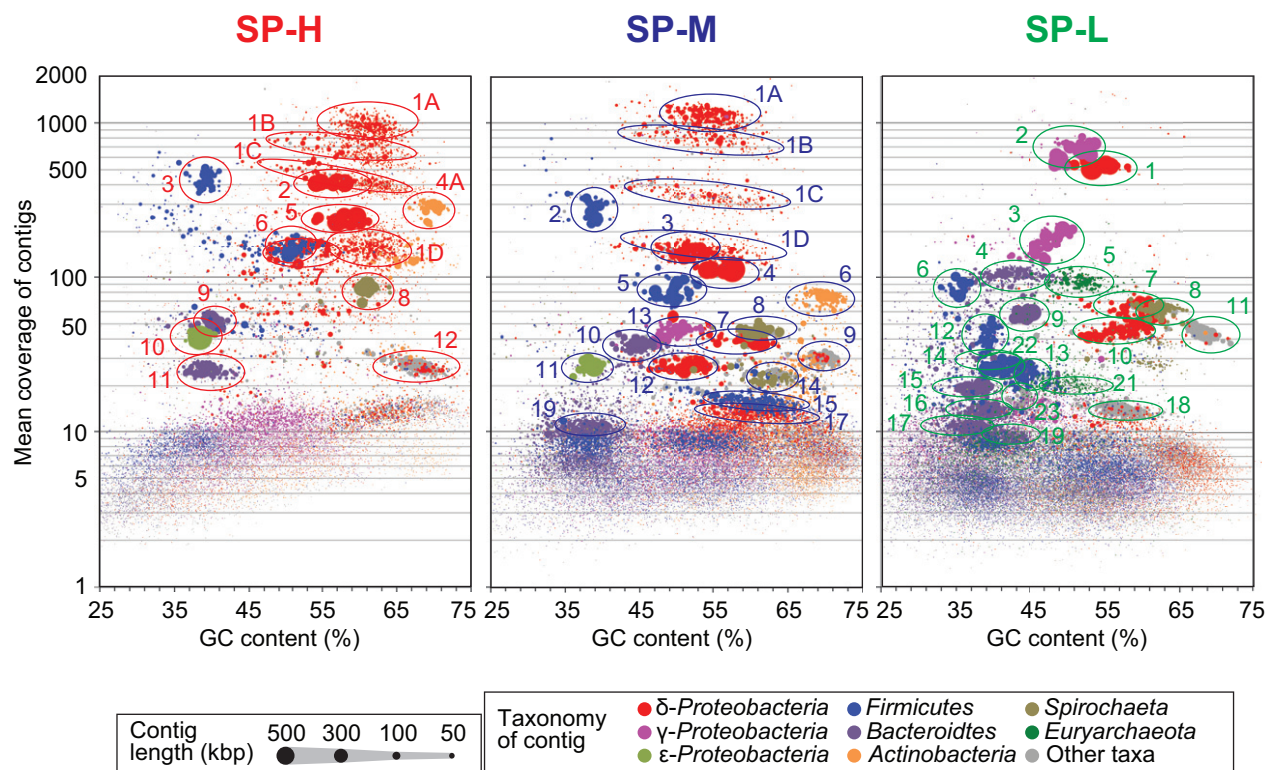

**Supplementary Fig. S3 | Identified bin-genomes of dominant strains within the EET-active microbial communities established under different electrode surface potentials SP-H, SP-M, or SP-L.**

Bin-genome clusters (colored circles, ID described near circles) which were established using the estimated taxonomic classification of contigs (color of dots), contig lengths (size of dots), GC content of contigs (%), and mean coverage of contig. Microbial communities were established under +100 mV vs SHE for SP-H, -50 mV vs SHE for SP-M, and -200 mV vs SHE for SP-L, respectively.

**A**

|       | Hcon1  | Hcon2  | Hcon3        | Hcon4  | Hcon5  | Mcon1        | Lcon1         |
|-------|--------|--------|--------------|--------|--------|--------------|---------------|
| Hcon1 | 1      | 0.995  | <b>0.955</b> | 0.993  | 0.966  | <b>0.087</b> | <b>-0.113</b> |
| Hcon2 | 0.995  | 1      | 0.945        | 0.997  | 0.957  | 0.082        | -0.109        |
| Hcon3 | 0.955  | 0.945  | 1            | 0.940  | 0.984  | 0.101        | -0.115        |
| Hcon4 | 0.993  | 0.997  | 0.940        | 1      | 0.952  | 0.081        | -0.104        |
| Hcon5 | 0.966  | 0.957  | 0.984        | 0.952  | 1      | 0.116        | -0.106        |
| Mcon1 | 0.087  | 0.082  | 0.101        | 0.081  | 0.116  | 1            | 0.029         |
| Lcon1 | -0.113 | -0.109 | -0.115       | -0.104 | -0.106 | 0.029        | 1             |

**B**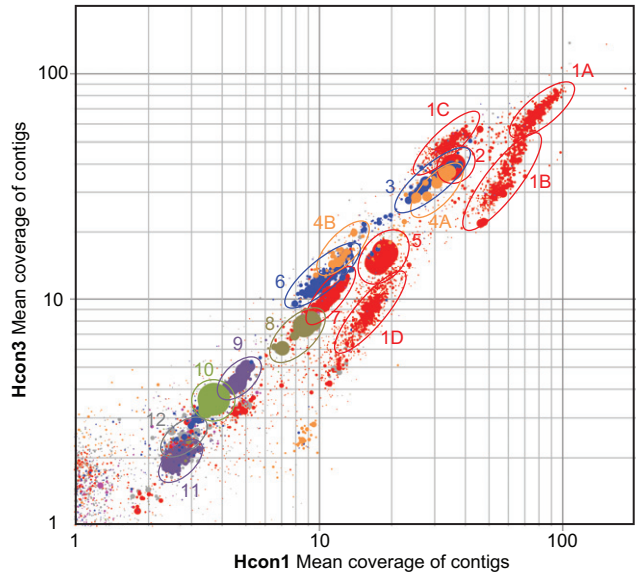**C**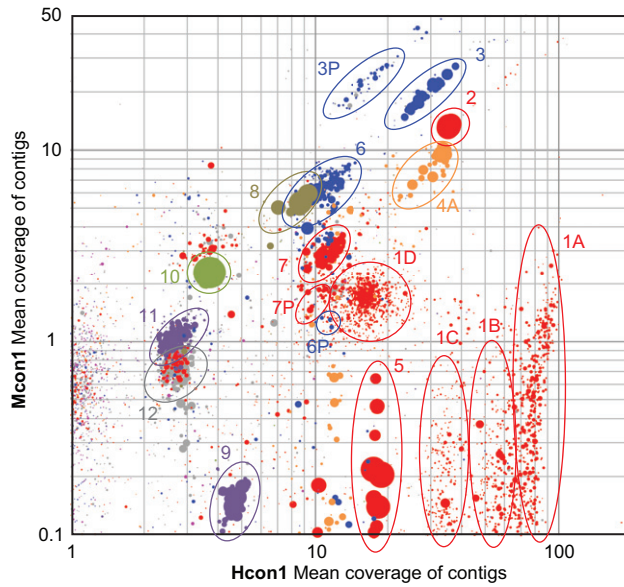**D**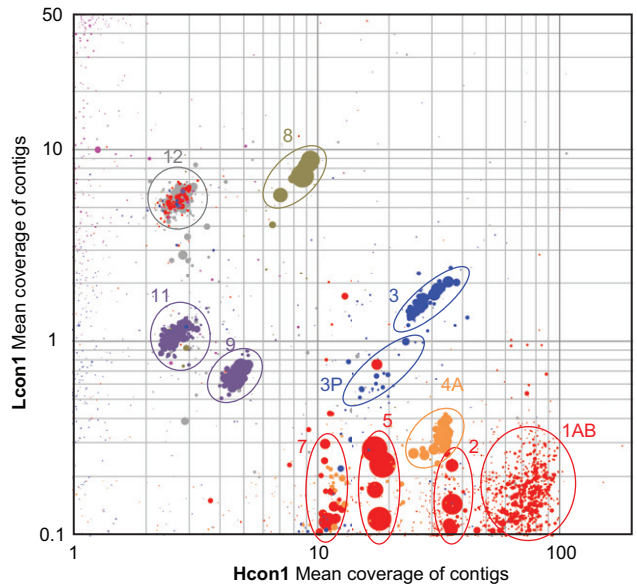

Taxonomy of contig

- $\delta$ -Proteobacteria
- Firmicutes
- Spirochaeta
- $\gamma$ -Proteobacteria
- Bacteroides
- Euryarchaeota
- $\epsilon$ -Proteobacteria
- Actinobacteria
- Other taxa

Contig length (kbp)

- 500
- 300
- 100
- 50

### Supplementary Fig. S4 | Identification of bin-genomes of dominant strains within SP-H microbial communities by using cross read mapping.

Panel A shows similarity matrix of mean coverage of contigs between five different samples of SP-H, and con1 samples for SP-M and SP-L. Raw reads for each condition were separately mapped to SP-H contigs by using similarity cut-off 0.95 and length cut-off 0.7. Associations used for further bin-genome cluster clean up by cross mapping chart were highlighted by white letters on red background. Panel B-D show SP-H bin-genome clusters (colored circles, ID described near circles) which were used for refining the bin-genomes; panel B for Hcon1 vs Hcon3, panel C for Hcon1 vs Mcon1, and panel D for Hcon1 vs Lcon1. Color of dots indicate estimated taxonomy of contigs, while size of dots indicate length of contigs.

**A**

|       | Mcon1 | Mcon2 | Mcon3 | Mcon4 | Mcon5        | Hcon1        | Lcon1        |
|-------|-------|-------|-------|-------|--------------|--------------|--------------|
| Mcon1 | 1     | 0.963 | 0.994 | 0.990 | 0.994        | 0.008        | 0.391        |
| Mcon2 | 0.963 | 1     | 0.981 | 0.984 | <b>0.942</b> | <b>0.010</b> | <b>0.528</b> |
| Mcon3 | 0.994 | 0.981 | 1     | 0.996 | 0.986        | 0.015        | 0.458        |
| Mcon4 | 0.990 | 0.984 | 0.996 | 1     | 0.982        | 0.005        | 0.458        |
| Mcon5 | 0.994 | 0.942 | 0.986 | 0.982 | 1            | 0.016        | 0.365        |
| Hcon1 | 0.008 | 0.010 | 0.015 | 0.005 | 0.016        | 1            | -0.057       |
| Lcon1 | 0.391 | 0.528 | 0.458 | 0.458 | 0.365        | -0.057       | 1            |

**B**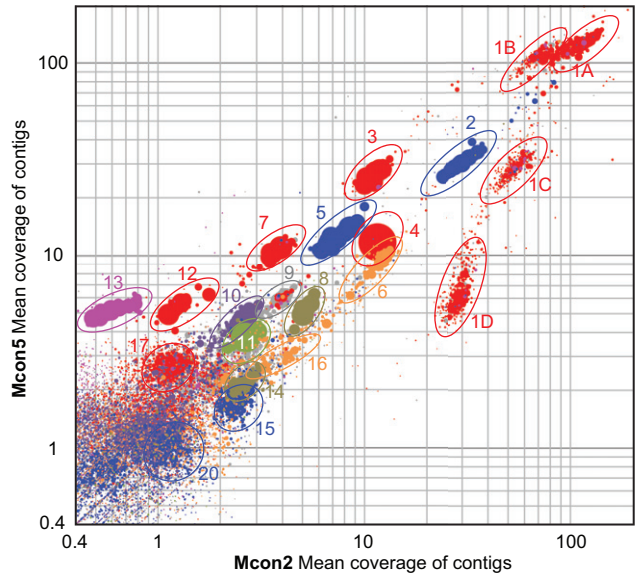**C**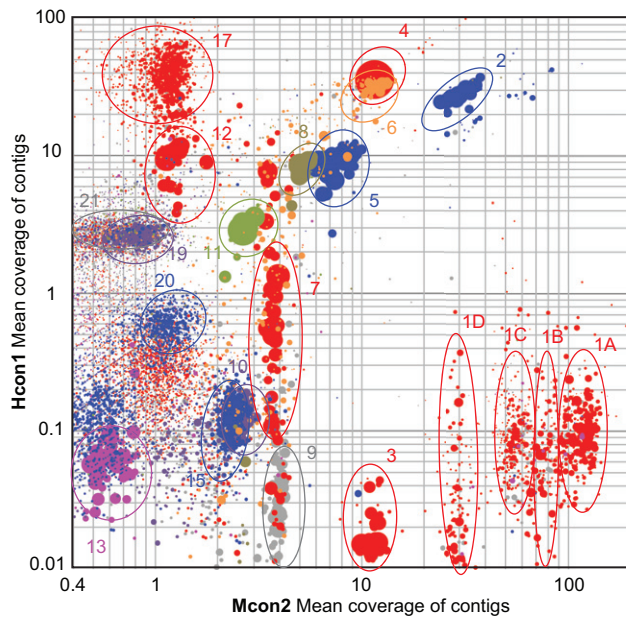**D**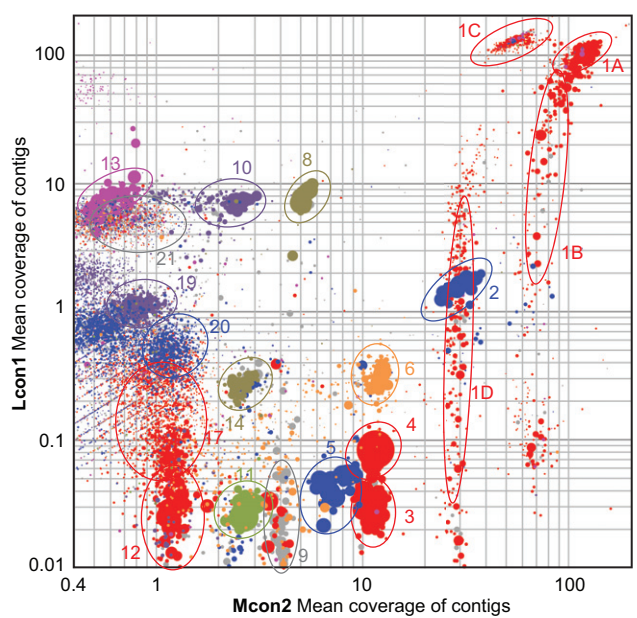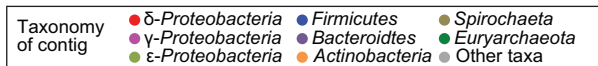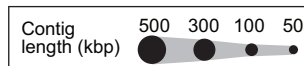

### Supplementary Fig. S5 | Identification of bin-genomes of dominant strains within SP-M microbial communities by using cross read mapping.

Panel A shows similarity matrix of mean coverage of contigs between five different samples of SP-M, and con1 samples for SP-H and SP-L. Raw reads for each condition were separately mapped to SP-M contigs by using similarity cut-off 0.95 and length cut-off 0.7. Associations used for further bin-genome cluster clean up by cross mapping chart were highlighted by white letters on red background. Panel B-D show SP-M bin-genome clusters (colored circles, ID described near circles) which were used for refining the bin-genomes; panel B for Mcon2 vs Mcon4, panel C for Mcon2 vs Hcon1, and panel D for Mcon2 vs Lcon1. Color of dots indicate estimated taxonomy of contigs, while size of dots indicate length of contigs.

**A**

|       | Lcon1 | Lcon2 | Lcon3 | Lcon4 | Lcon5 | Hcon1 | Mcon1 |
|-------|-------|-------|-------|-------|-------|-------|-------|
| Lcon1 | 1     | 0.904 | 0.764 | 0.808 | 0.844 | 0.147 | 0.290 |
| Lcon2 | 0.904 | 1     | 0.955 | 0.959 | 0.947 | 0.126 | 0.208 |
| Lcon3 | 0.764 | 0.955 | 1     | 0.977 | 0.942 | 0.094 | 0.125 |
| Lcon4 | 0.808 | 0.959 | 0.977 | 1     | 0.978 | 0.151 | 0.159 |
| Lcon5 | 0.844 | 0.947 | 0.942 | 0.978 | 1     | 0.189 | 0.186 |
| Hcon1 | 0.147 | 0.126 | 0.094 | 0.151 | 0.189 | 1     | 0.199 |
| Mcon1 | 0.290 | 0.208 | 0.125 | 0.159 | 0.186 | 0.199 | 1     |

**B**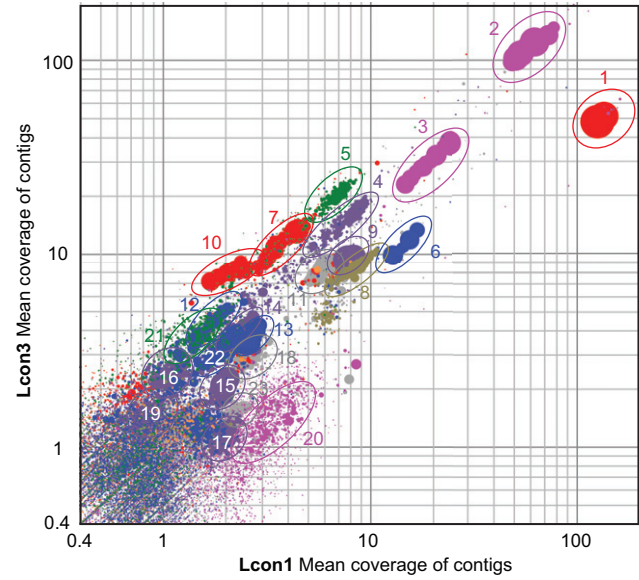**C**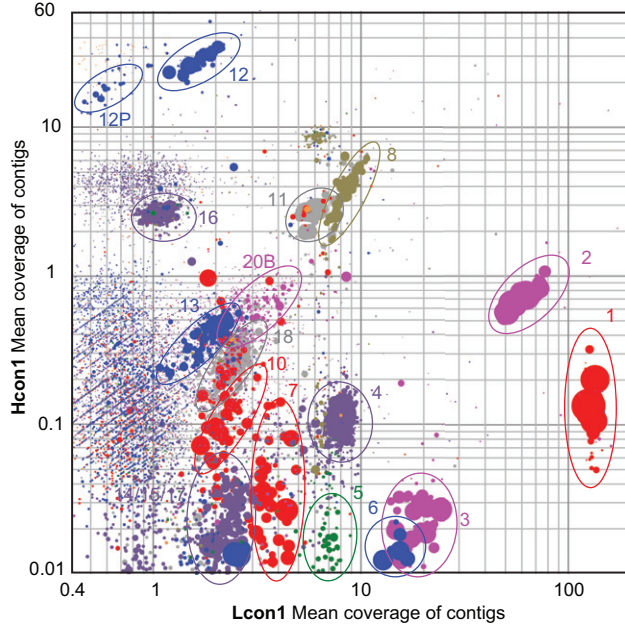**D**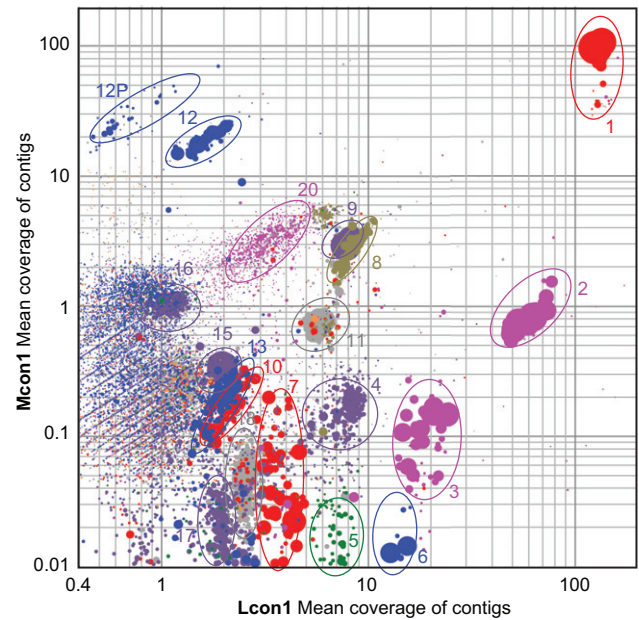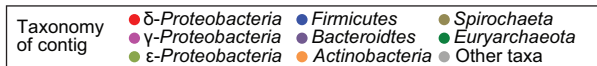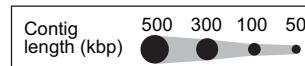

### Supplementary Fig. S6 | Identification of bin-genomes of dominant strains within SP-L microbial communities by using cross read mapping.

Panel A shows similarity matrix of mean coverage of contigs between five different samples of SP-L, and con1 samples for SP-H and SP-L. Raw reads for each condition were separately mapped to SP-L contigs by using similarity cut-off 0.95 and length cut-off 0.7. Associations used for further bin-genome cluster clean up by cross mapping chart were highlighted by white letters on red background. Panel B-D show SP-L bin-genome clusters (colored circles, ID described near circles) which were used for refining the bin-genomes; panel B for Lcon1 vs Lcon3, panel C for Lcon1 vs Hcon1, and panel D for Lcon1 vs Mcon1. Color of dots indicate estimated taxonomy of contigs, while size of dots indicate length of contigs.

**A** GyrB tree

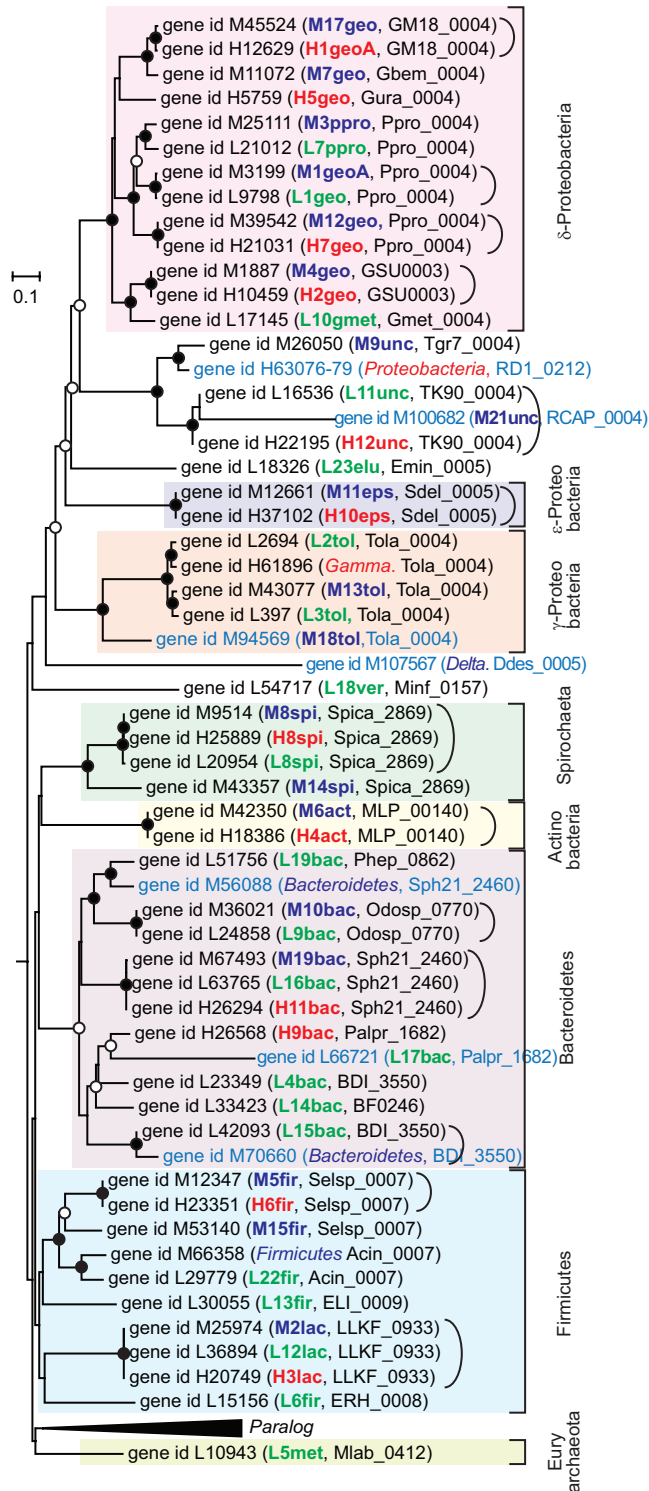

**B**

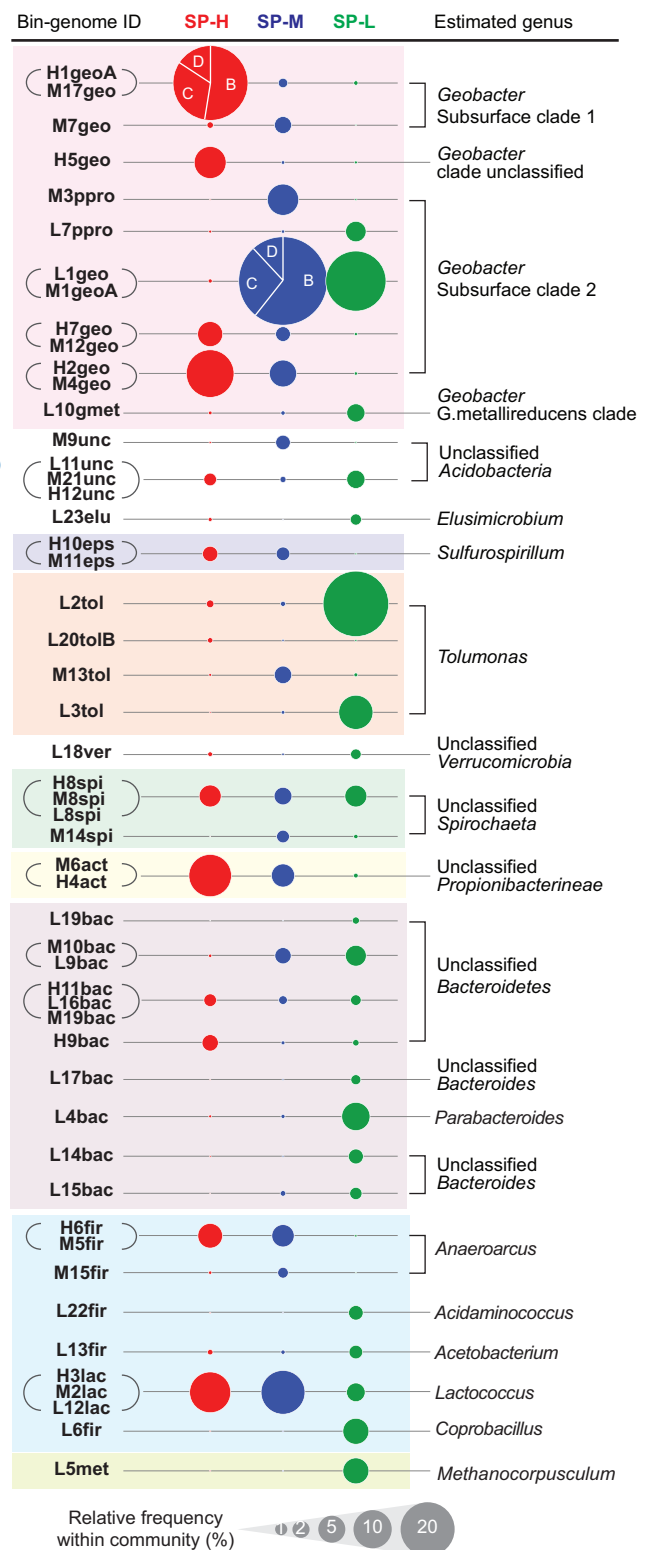

**Supplementary Fig. S7 | Taxonomic positions and relative frequencies of bin-genomes.**

Panel A shows a neighbor-joining phylogenetic tree of DNA gyrase beta subunit (GyrB) genes for bin-genomes observed in metagenomics analysis. Blue letters indicate using partial peptide information. The peptides are described as “orf ID (bin-genome ID, closest relative in RefSeq)”. Branch points supported with bootstrap values (100 trials) of >90% are indicated with closed circles, while those between 70% and 90% are indicated with open circles. Panel B shows relative frequencies within communities among SP-H, SP-M, and SP-L.

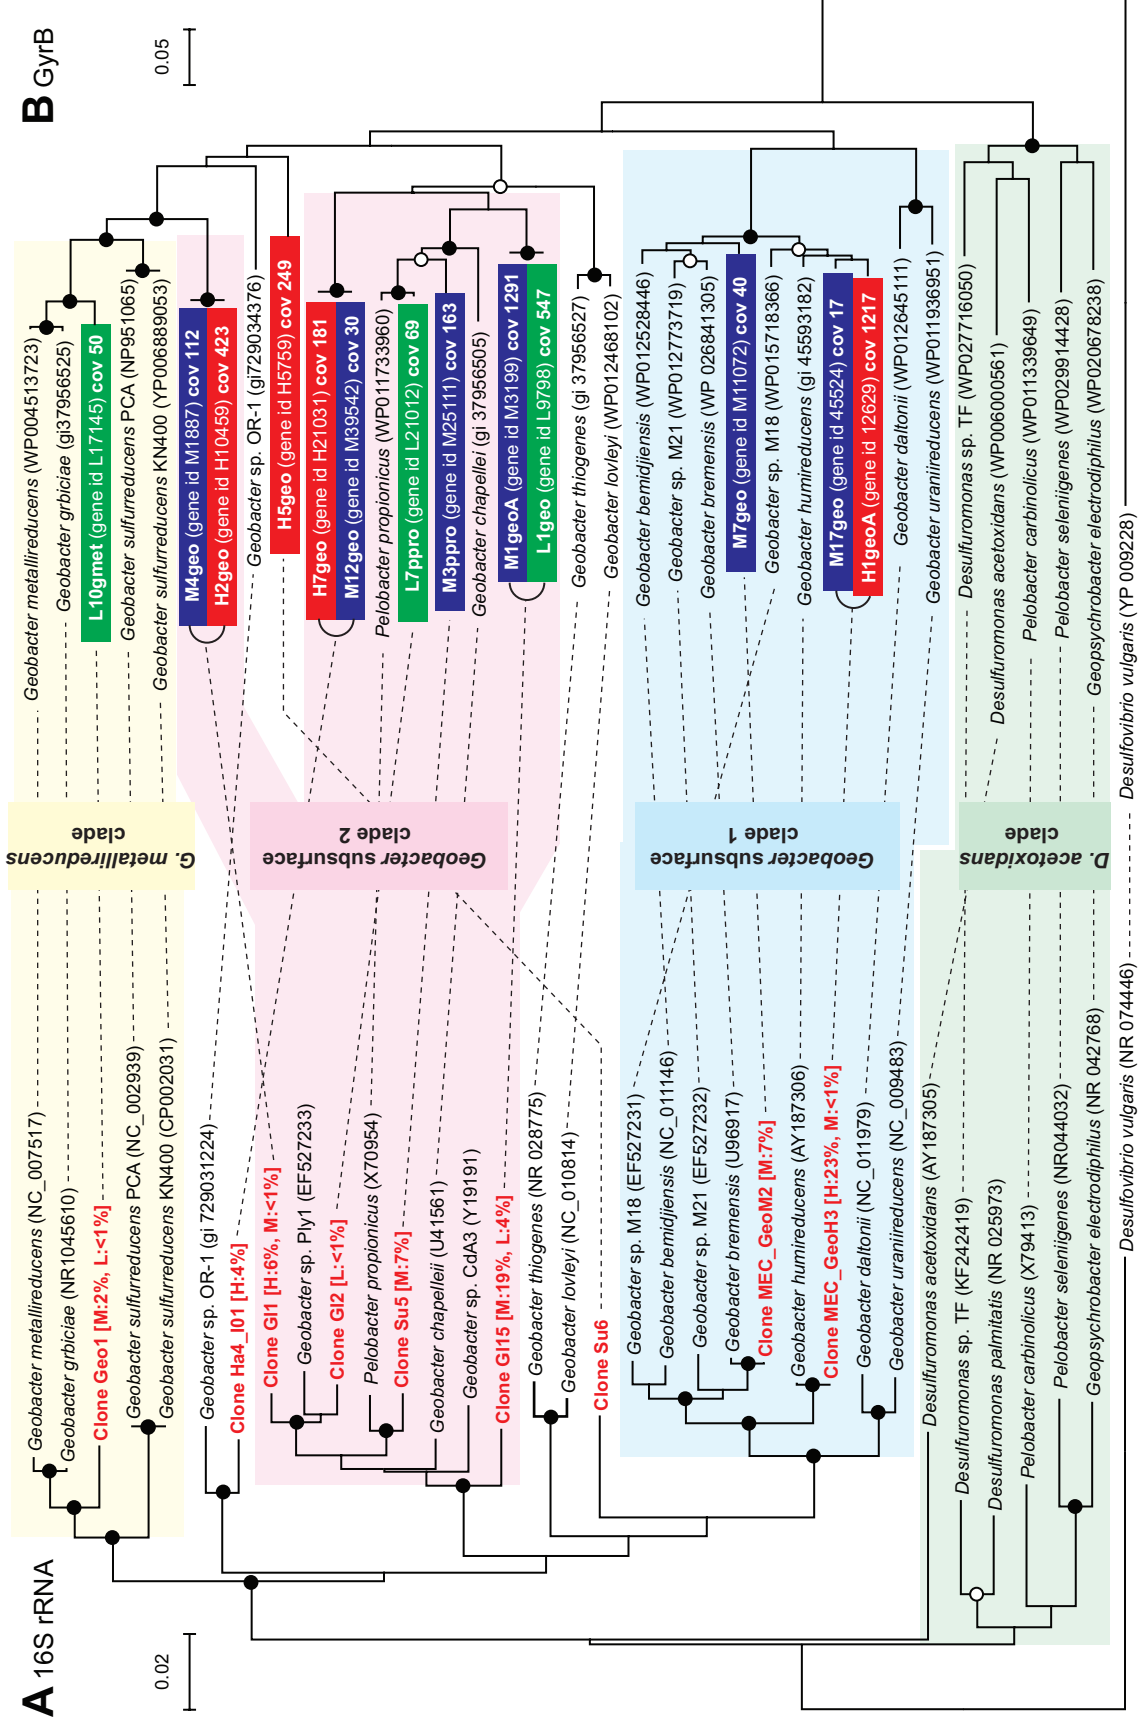

**Supplementary Fig. S8 | Neighbor-joining phylogenetic trees of 16S rRNA and GyrB showing positions of *Desulfuromonadales* strains.**

Panel A for 16S rRNA partial gene includes major *Desulfuromonadales* phylotypes observed in clone library analysis. The phylotypes are described as “clone ID [Community ID: % frequency]”. Panel B for DNA gyrase beta subunit (GyrB) gene includes major *Desulfuromonadales* peptides observed in metagenomics analysis. The peptides are described as “bin-genome ID (orf ID) mean coverage”. Branch points supported with bootstrap values (100 trials) of >90% are indicated with closed circles, while those between 70% and 90% are indicated with open circles. Accession numbers of reference sequences are indicated in parentheses.



### A. SP-H

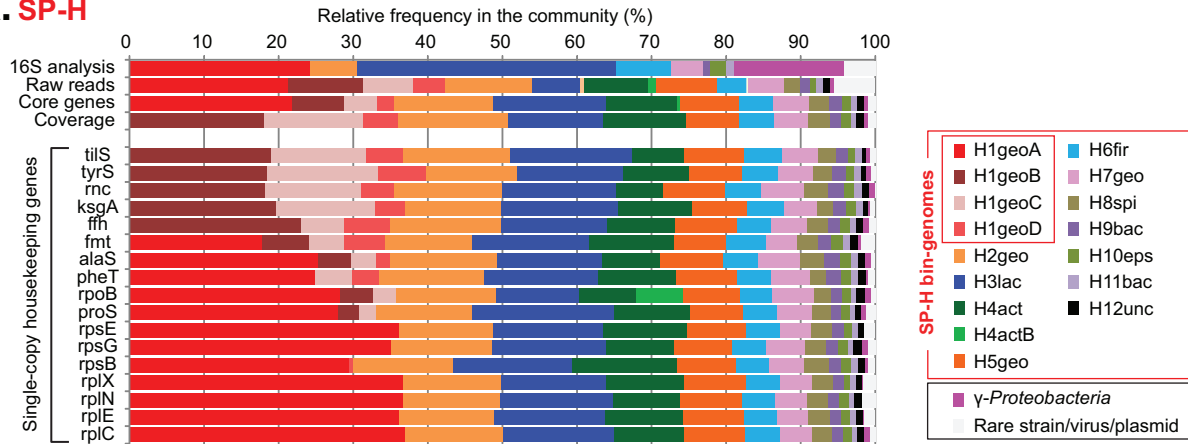

### B. SP-M

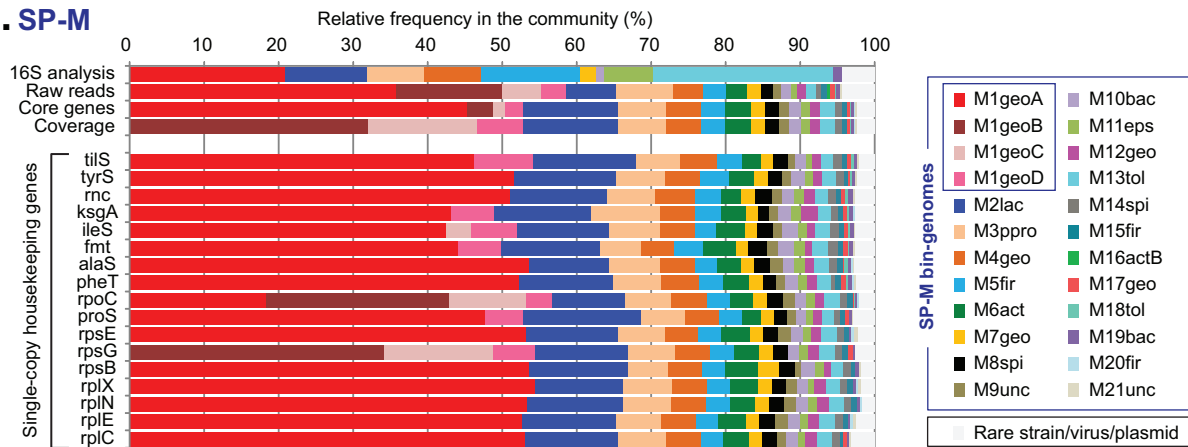

### C. SP-L

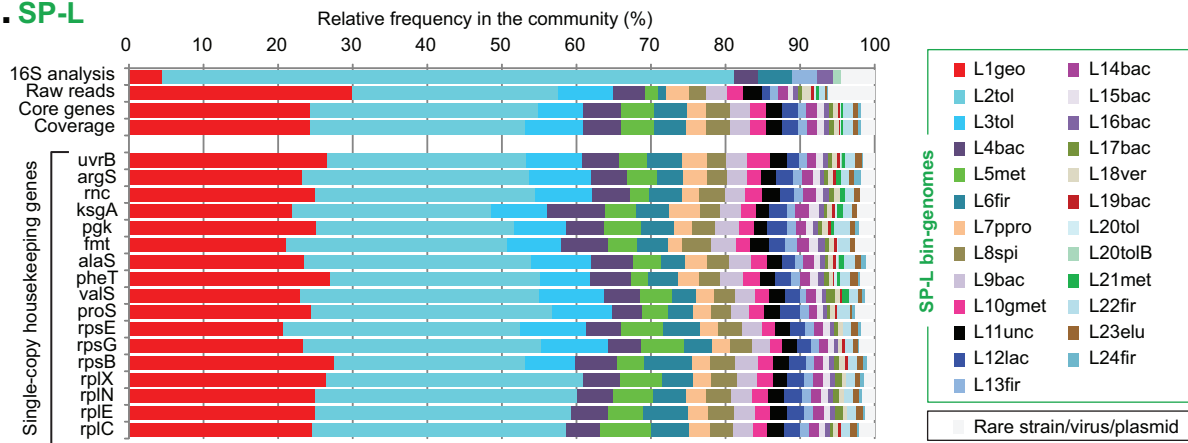

## Supplementary Fig. S10. Single-copy housekeeping gene-based analysis to profile microbial diversity using metagenomic analyses and bin-genome clustering

Relative frequencies of each strain within SP-H (A), SP-M (B) and SP-L (C) estimated from a relative abundance of 16S rRNA gene (16S analysis), percentage of mapped raw reads to each bin-genome (Raw reads), an average value of reads per kilobase per million mapped reads (RPKM) for 12 single-copied housekeeping genes (Core genes), an average RPKM value of contigs associated with each bin-genome (Coverage), and a RPKM value of twelve individual single-copied housekeeping genes.

**A**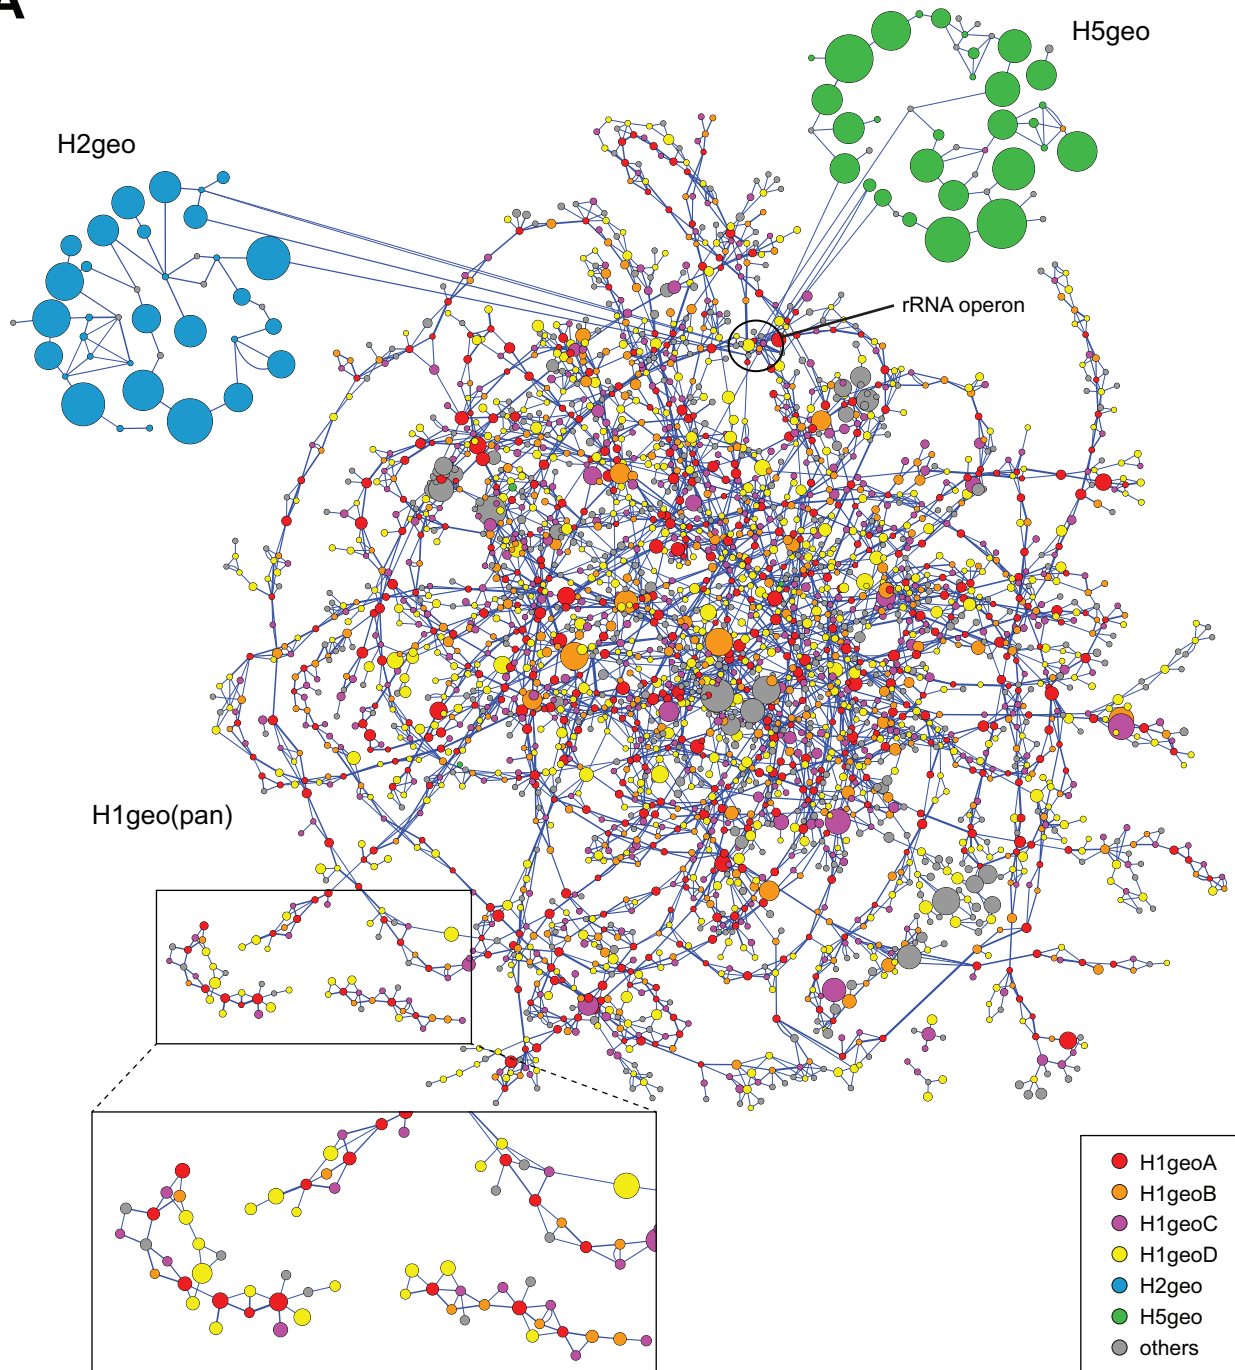

**Supplementary Fig. S11 | Visualization of paired-end connections between ends of contigs for dominant *Geobacter/Pelobacter* members in each community.**

Contigs (colored bubbles) are linked by blue lines to show paired-end connections (>5) between edges of contigs. A network graph is generated based on three dominant *Geobacter/Pelobacter* bin-genomes in SP-H (panel A), SP-M (panel B), or SP-L (panel C). The bin-genome ID for each contig is shown by using different colors. The line width is scaled by the number of connections, while the size of bubbles is scaled by the length of contigs. The network graph was generated directly from a read mapping file to contigs using CLC Genomics Workbench and visualised using Cytoscape.

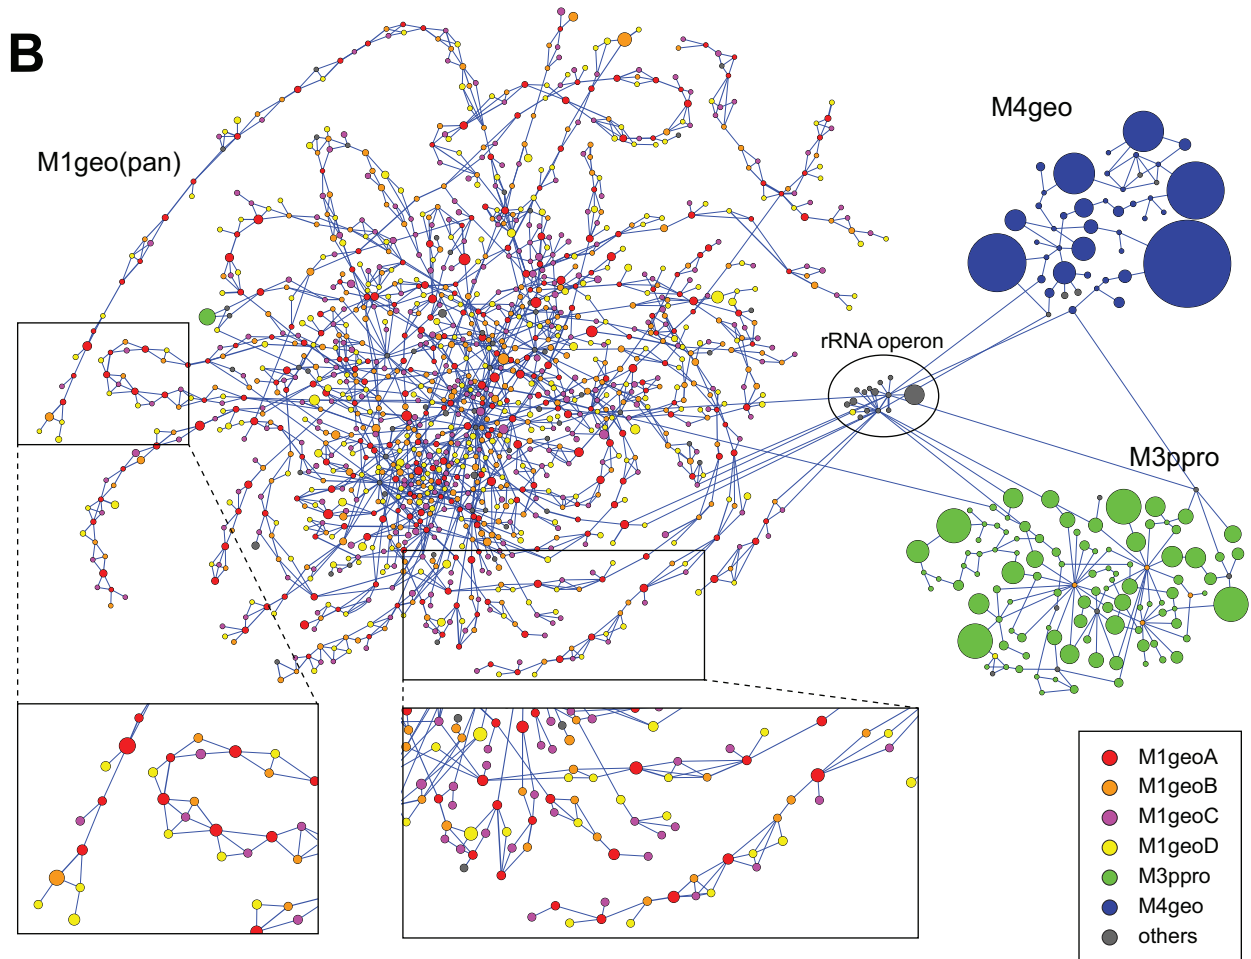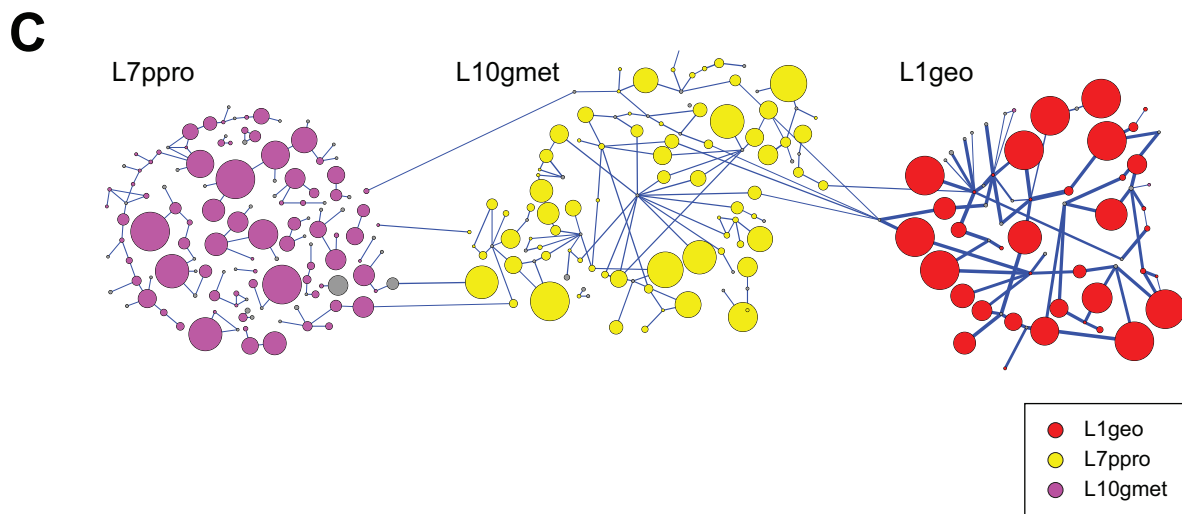

Supplementary Fig. S11 | *Continued.*

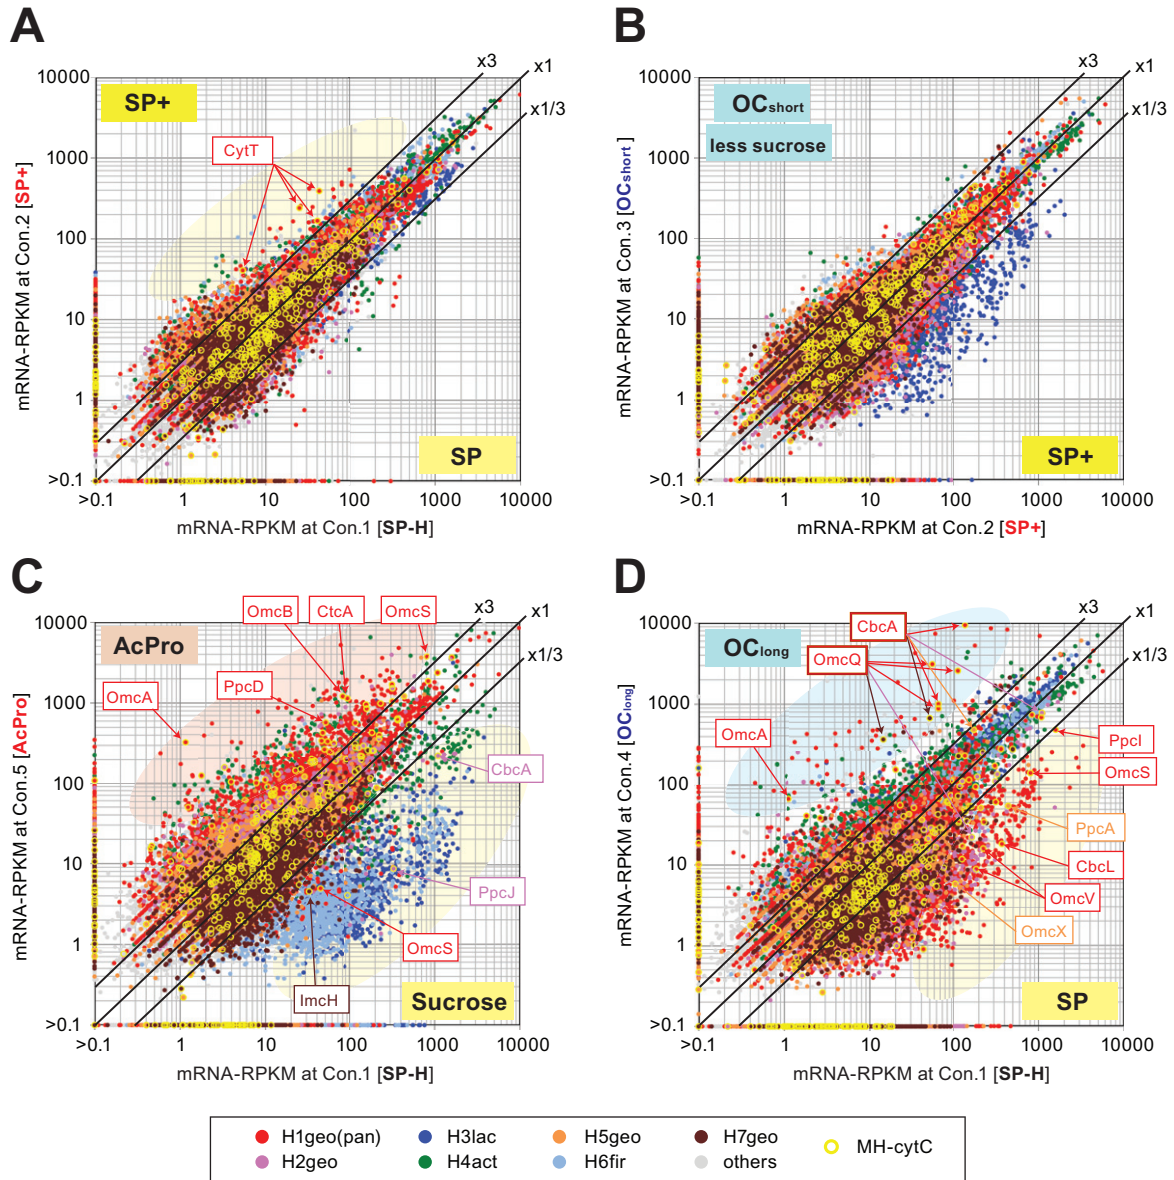

**Supplementary Fig. S12 | Scatter plots comparing gene expression changes responsive to given EET stimuli in SP-H bin-genomes.**

Scatter plots of all CDS responses as measured by mRNA frequency (mRNA-RPKM) for the SP-H electrogenic community between con.1 (SP-H) and con.2 (SP+) conditions in panel A, between con.2 (SP+) and con.3 (OC<sub>short</sub>) conditions in panel B, between con.1 (SP-H) and con.5 (AcPro) in panel C, and between con.1 (SP-H) and con.4 (OC<sub>long</sub>) in panel D. Highly abundant strains are shown as unique colors, all other groups are shown in gray. MH-cytC CDSs (CXXCH  $\geq 2$ ) are highlighted by yellow circle, and MH-cytCs with remarkable expression change are labeled with color of representative bin-genome.

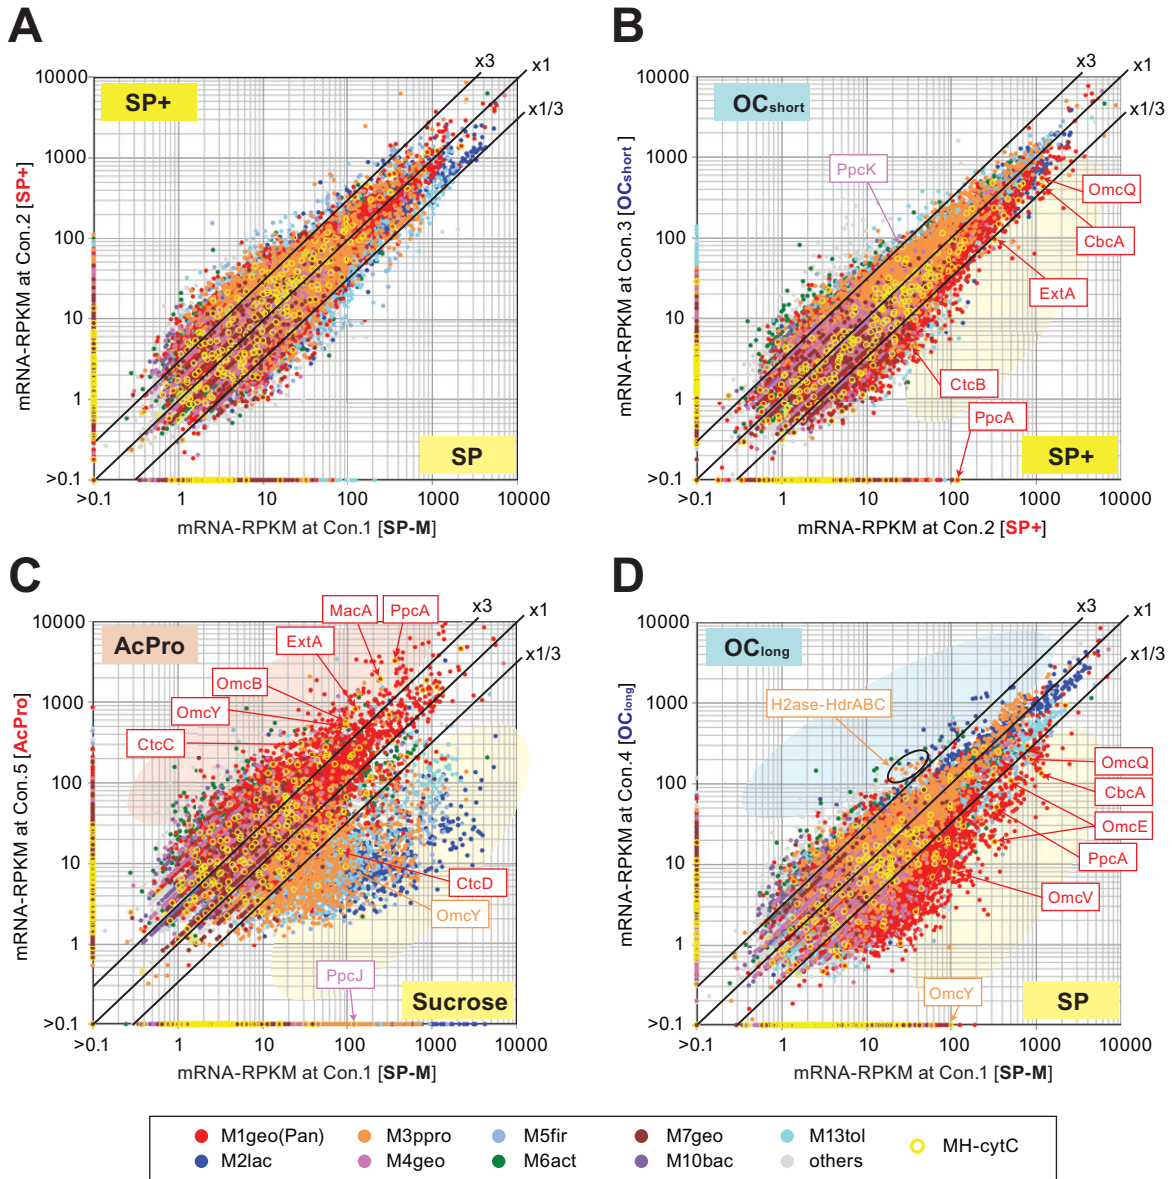

**Supplementary Fig. S13 | Scatter plots comparing gene expression changes responsive to given EET stimuli in SP-M bin-genomes.**

Scatter plots of all CDS responses as measured by mRNA frequency (mRNA-RPKM) for the SP-M electrogenic community between con.1 (SP-M) and con.2 (SP+) conditions in panel A, between con.2 (SP+) and con.3 (OC<sub>short</sub>) conditions in panel B, between con.1 (SP-M) and con.5 (AcPro) in panel C, and between con.1 (SP-M) and con.4 (OC<sub>long</sub>) in panel D. Highly abundant strains are shown as unique colors, all other groups are shown in gray. MH-cytC CDSs (CXXCH  $\geq 2$ ) are highlighted by yellow circle, and MH-cytCs with remarkable expression change are labeled with color of representative bin-genome.

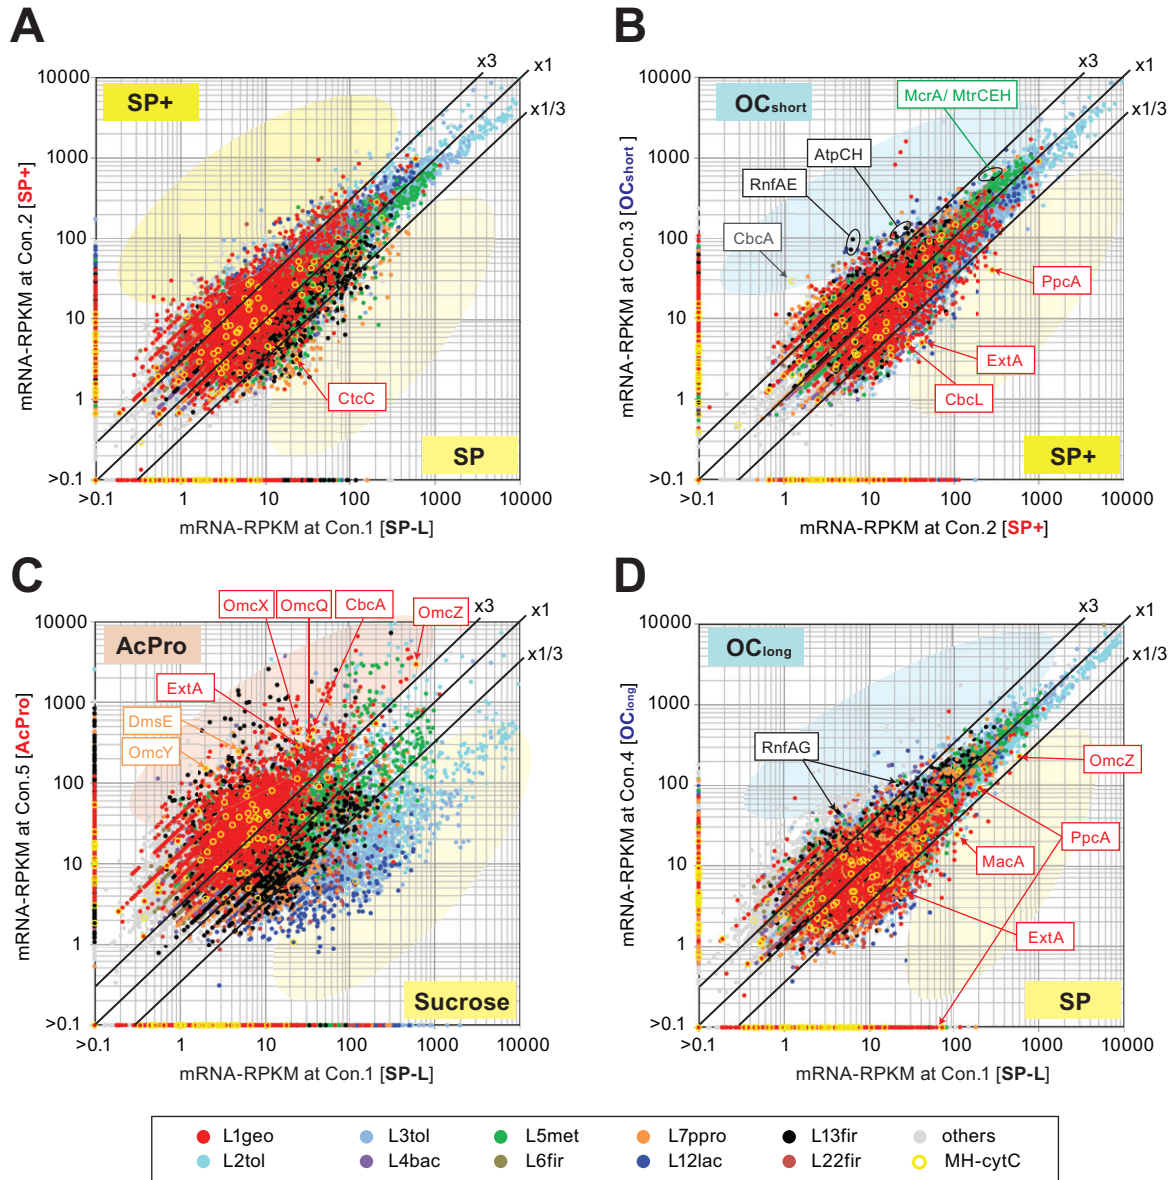

**Supplementary Fig. S14 | Scatter plots comparing gene expression changes responsive to given EET stimuli in SP-L bin-genomes.**

Scatter plots of all CDS responses as measured by mRNA frequency (mRNA-RPKM) for the SP-L electrogenic community between con.1 (SP-L) and con.2 (SP+) conditions in panel A, between con.2 (SP+) and con.3 (OC<sub>short</sub>) conditions in panel B, between con.1 (SP-L) and con.5 (AcPro) in panel C, and between con.1 (SP-L) and con.4 (OC<sub>long</sub>) in panel D. Highly abundant strains are shown as unique colors, all other groups are shown in gray. MH-cytC CDSs (CXXCH  $\geq$  2) are highlighted by yellow circle, and MH-cytCs with remarkable expression change are labeled with color of representative bin-genome.

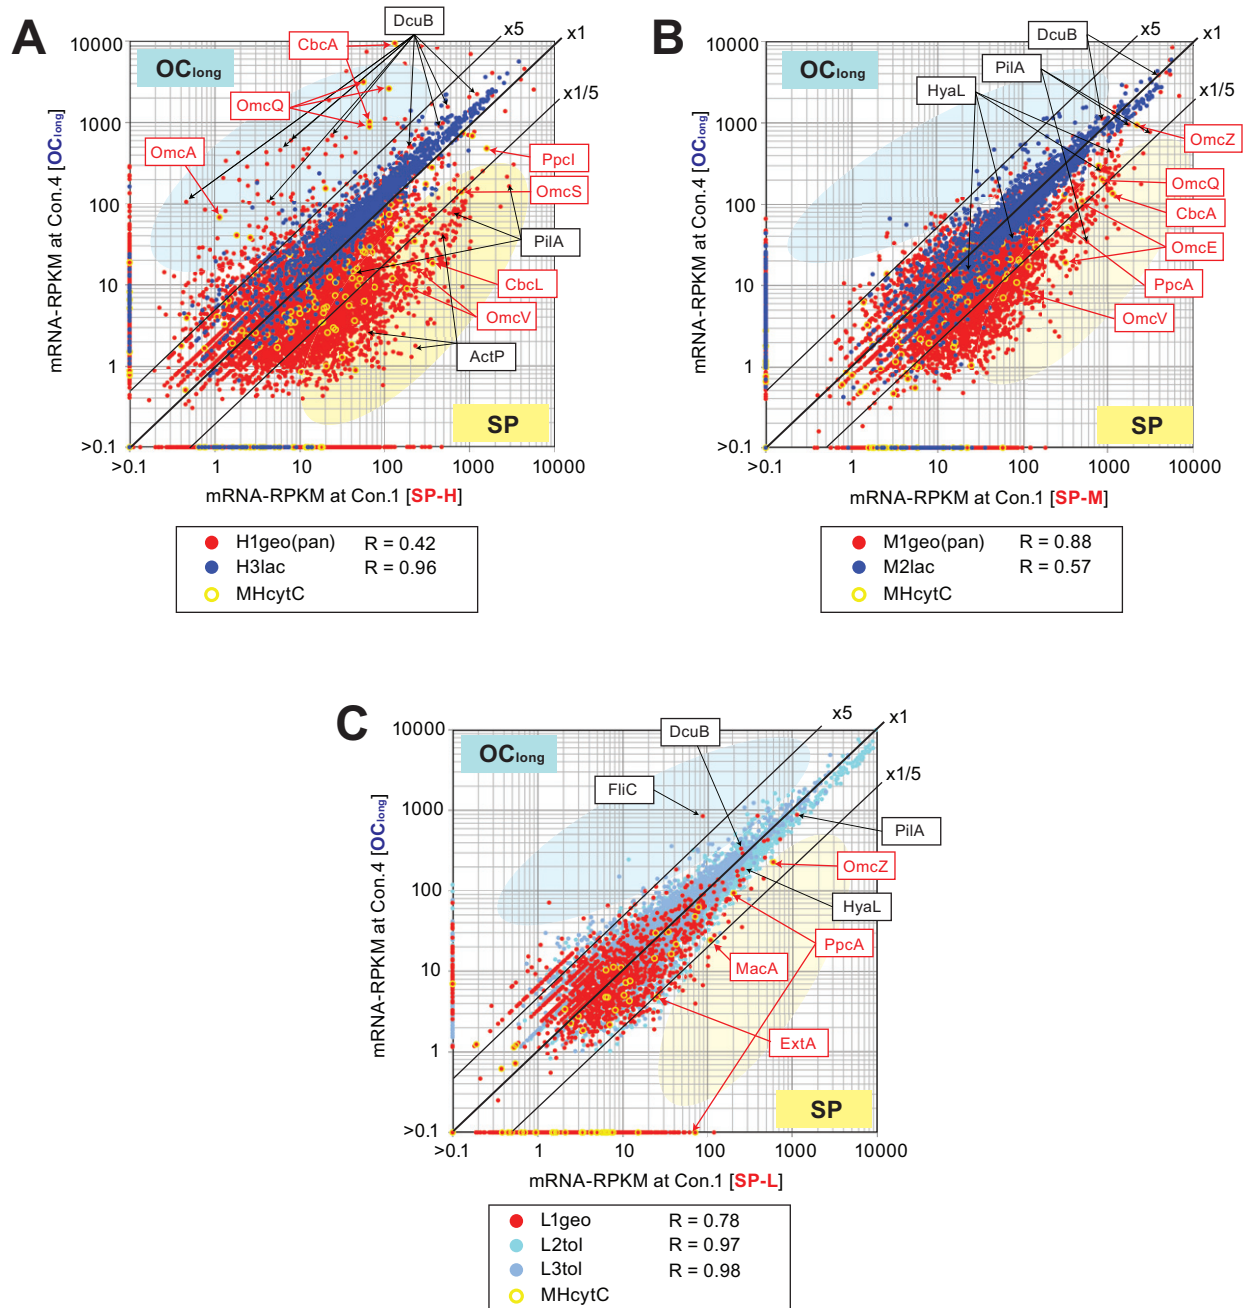

**Supplementary Fig. S15 | Scatter plots comparing gene expression changes of dominant electrogenic and fermenter bin-genomes between EET and OC conditions.**

Scatter plots of all CDS responses as measured by mRNA frequency (mRNA-RPKM) for dominant electrogenic and fermenter bin-genomes between con.1 (SP basal condition) and con.4 (OC<sub>long</sub>). Panel A, OCSs H1geo(pan) and H3lac in the SP-H electrogenic community; panel B, OCSs M1geo(pan) and M2lac in the SP-M electrogenic community; and panel C, OCSs L1geo, L2tol, and L3tol in the SP-L electrogenic community. MH-cytC CDSs (CXXCH  $\geq 2$ ) are highlighted by yellow circle, and marker genes with remarkable expression change are labeled. Correlation coefficient (R) is shown next to the labels.

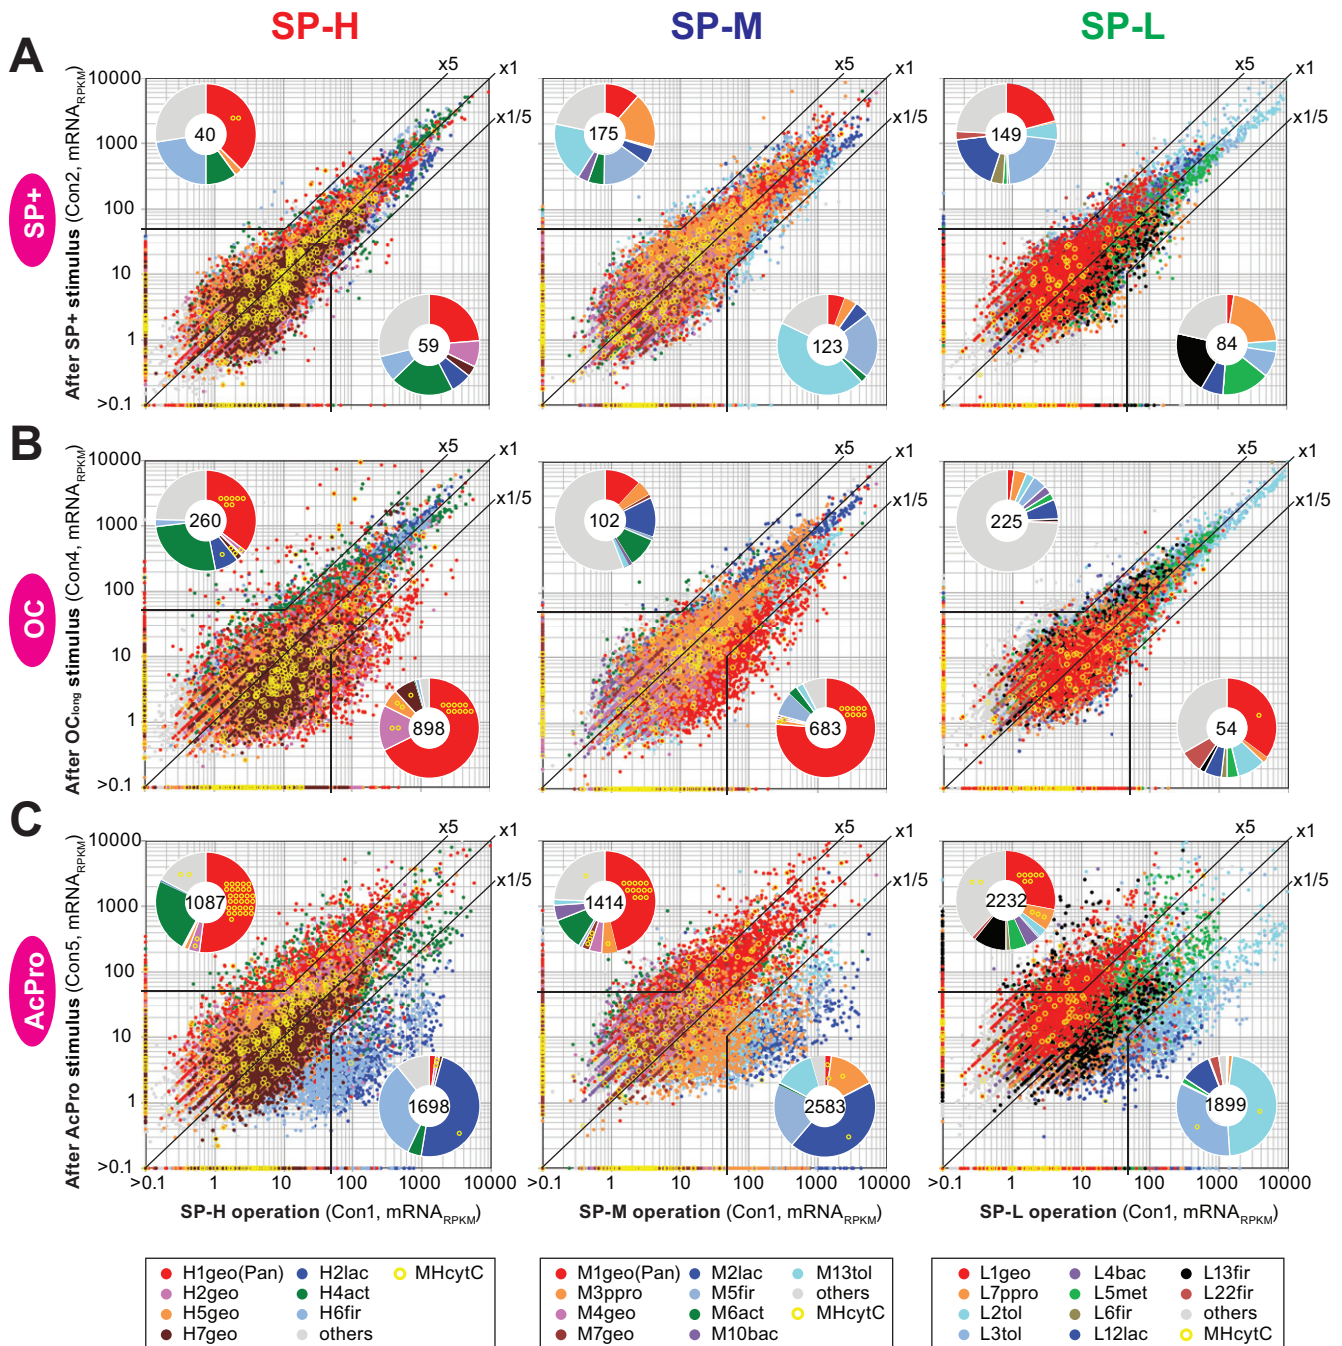

**Supplementary Fig. S16 | Gene expression changes by three EET stimuli for three different communities.**

Scatter plots of all CDS responses as measured by mRNA frequency (mRNA-RPKM) after SP+ stimulus (panels A), OC<sub>long</sub> stimulus (panels B) or AcPro stimulus (panels C) compared to static EET operations of SP-H (left), SP-M (middle), or SP-L (right). Several dominant OCSs are shown as unique color dots, all other groups are shown in grey dots, and MH-cytCs are shown in yellow circles. CDSs that showed remarkable responses (5-times change and mRNA-RPKM after/before stimulus over 50) to the given stimulus were summed relative to OCSs in ring charts and numbers of MH-cytCs (yellow circles). The ring charts of upper left showed up-regulation by the stimulus, while those of downer right showed down regulation by the stimulus in each scatter plot. The numbers of remarkably changed CDSs were shown in the center of rings.

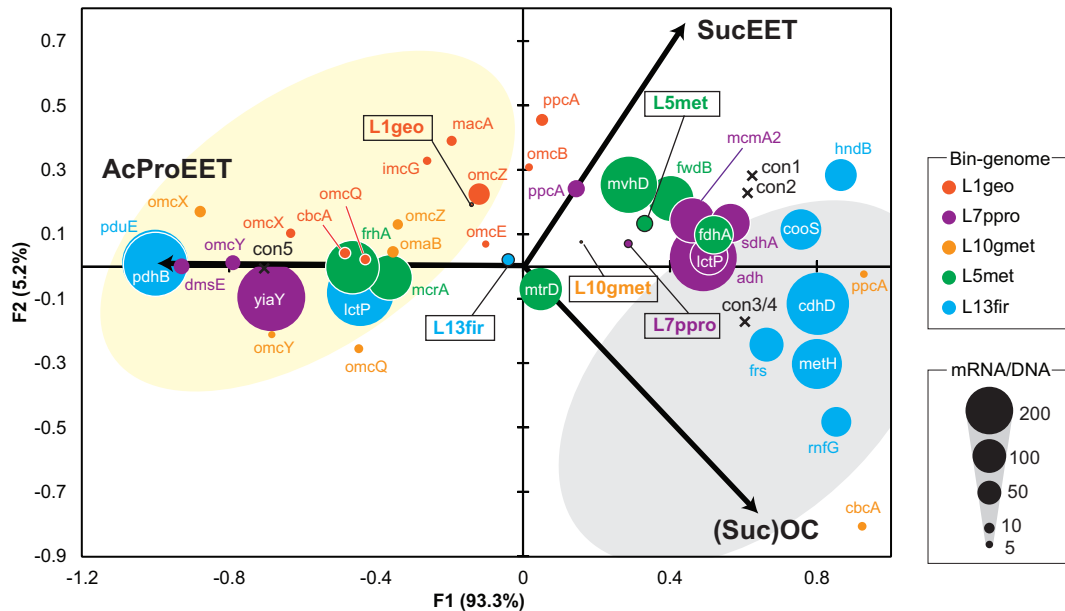

**Supplementary Fig. S17 | wCCA diagrams comparing gene expression dynamics in five SP-L bin-genomes that reponsive to EET stimuli.**

Weighted canonical correspondence analysis (wCCA) diagram comparing gene expression dynamics of MH-cytCs for *Geonacteraceae* strain L1geo, L7ppro, L10gmet, methanogenesis genes for L5met, and reductive acetyl-coA pathway genes for L13fir under five operational conditions with the stilumi addition for electrogenic microbial community SP-L. Size of dots indicates summed gene expression levels (mRNA-RPKM per DNA-RPKM) for the five conditions, while color of dots indicates bin-genomes. wCCA diagram showing the relationships between three operational variables (sucrose-consuming EET as SucEET, acetate/propionate-consuming EET as AcProEET, and open circuit as OC, black arrows), five operation conditions (cross marks), and highly expressed genes (dots) as well as whole gene expression (dots with black border) of the dominant microbes. Gene names were described near or within dots, while bin-genome IDs were described near dots with boxes.

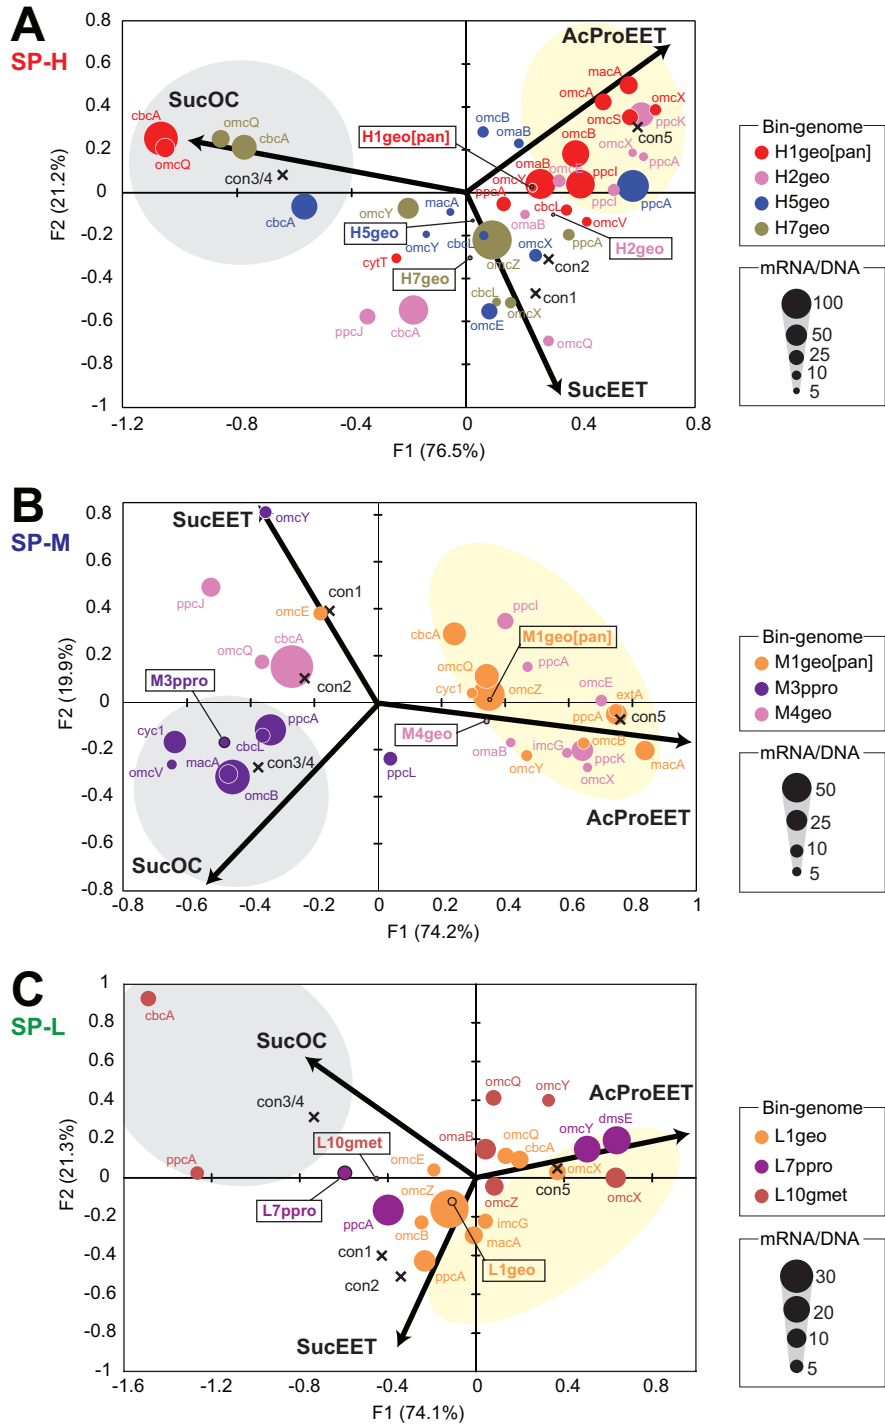

**Supplementary Fig. S18 | wCCA diagrams comparing gene expression dynamics of multi-heme *c*-type cytochromes in dominant *Geobacteraceae* OCSs to the given stimuli.**

Weighted canonical correspondence analysis (wCCA) diagram comparing gene expression dynamics of MH-cytCs under five operational conditions with the stimuli addition for three electrogenic microbial communities SP-H (A), SP-M (B) and SP-L (C). Size of dots indicates summed gene expression levels (mRNA-RPKM per DNA-RPKM) for the five conditions, while color of dots indicates bin-genomes. wCCA diagram showing the relationships between three operational variables (sucrose-consuming EET as SucEET, acetate/propionate-consuming EET as AcProEET, and open circuit as OC, black arrows), five operation conditions (cross marks), and highly expressed MH-cytCs (dots) as well as whole gene expression (dots with black border) of dominant microbes. MH-cytC IDs were described near dots, while bin-genome IDs were described near dots with boxes.

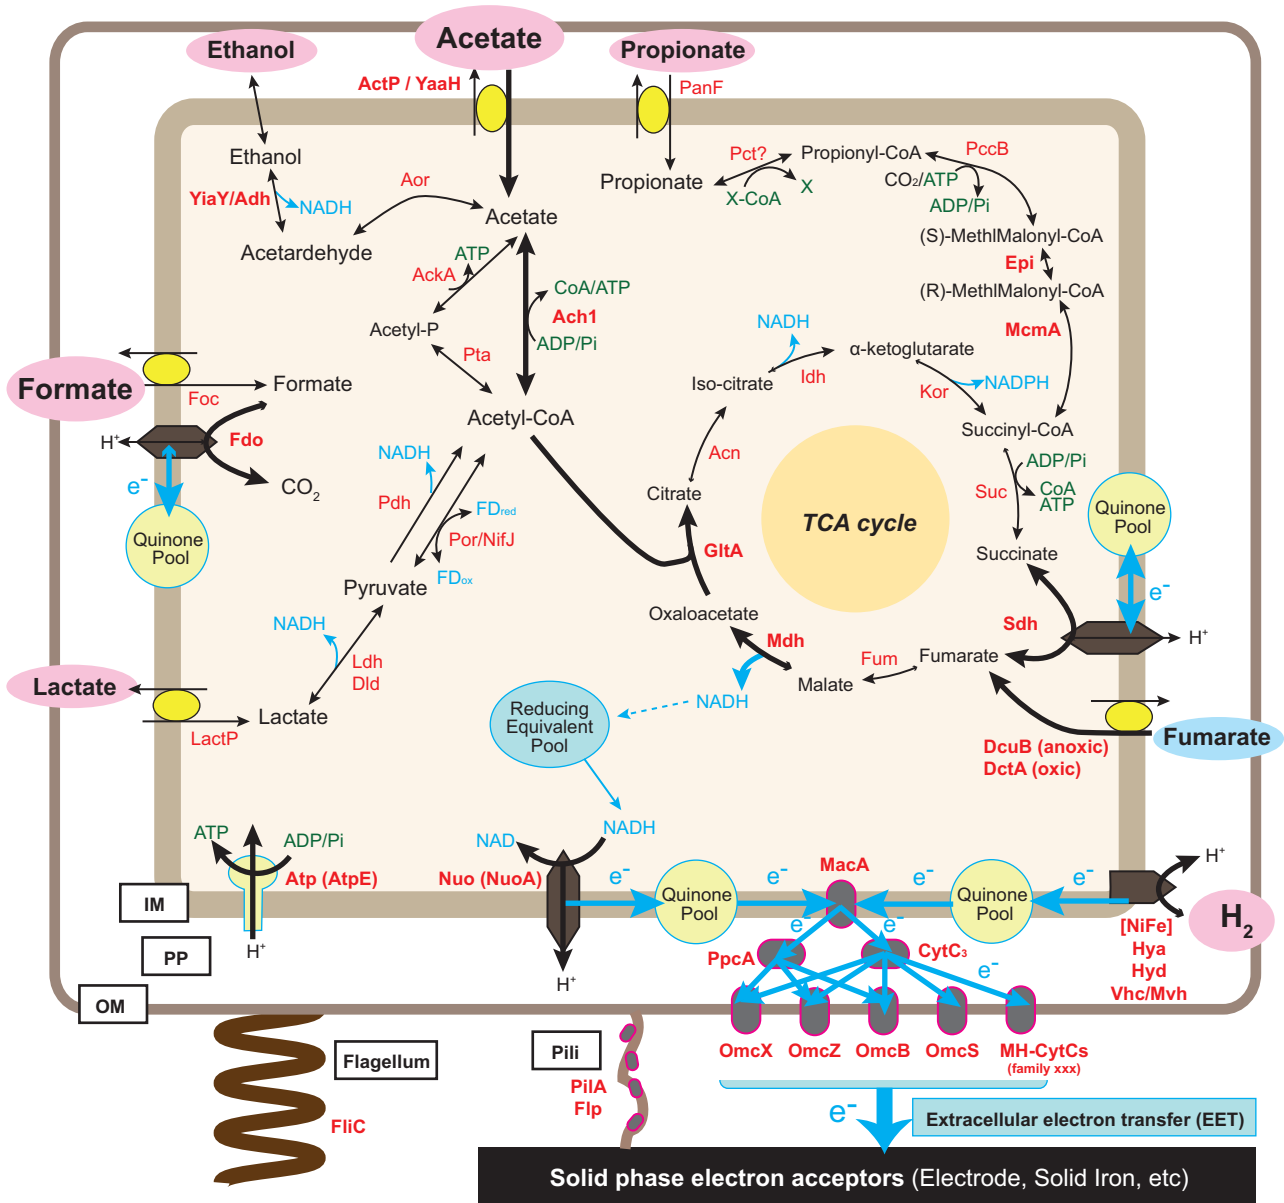

**Supplementary Fig. S19 | EET-related metabolic pathway correlated with electron donors and acceptors within *Geobacter* microbes.**

Selected genes (bold red letter) and related metabolic functions (thick arrow) are used for comparative gene expression analyses to identify their responses to the given stimuli. ActP, cation/acetate symporter (K14393); YaaH, acetate transporter, putative (K07034); Ach1, acetyl-CoA hydrolase (K01067); GltA, citrate synthase (K01647); SdhA, succinate dehydrogenase flavoprotein subunit (K00239); Mdh, malate dehydrogenase (K00024); Epi, methylmalonyl-CoA epimerase (K05606); McmA2, methylmalonyl-CoA mutase, C-terminal domain (K01849); NuoA, NADH-quinone oxidoreductase subunit A (K00330); AtpE, F-type  $H^+$ -transporting ATPase subunit c (K02110); HyaL, hydrogenase large subunit (K06281); HyaS, hydrogenase small subunit (K06282); MvhD, F420-non-reducing hydrogenase iron-sulfur subunit D (K14127); HydB2, [NiFe] hydrogenase large subunit (K00437); FdoG, formate dehydrogenase, alpha subunit (K00123); HydA, ferredoxin hydrogenase (K00532); FdoH, formate dehydrogenase, beta subunit (K00124); Adh, alcohol dehydrogenase (K00001); YiaY, alcohol dehydrogenase (K13954); FliC, flagellin (K02406); PilA, type IV pilus assembly protein PilA (K02650); Flp, pilus assembly protein Flp/PilA (K02651); dctA, aerobic C4-dicarboxylate transport protein (K11103); DcuB, anaerobic C4-dicarboxylate transporter (K07792); MacA, cytochrome c peroxidase; PpcA/CytC<sub>3</sub>, cytochrome c3; OmcX/OmcZ/OmcB/OmcS/MH-CytCs, outer membrane multi-heme c-type cytochrome proteins; e<sup>-</sup>, electron; IM, inner membrane; PP, periplasm; OM, outer membrane.

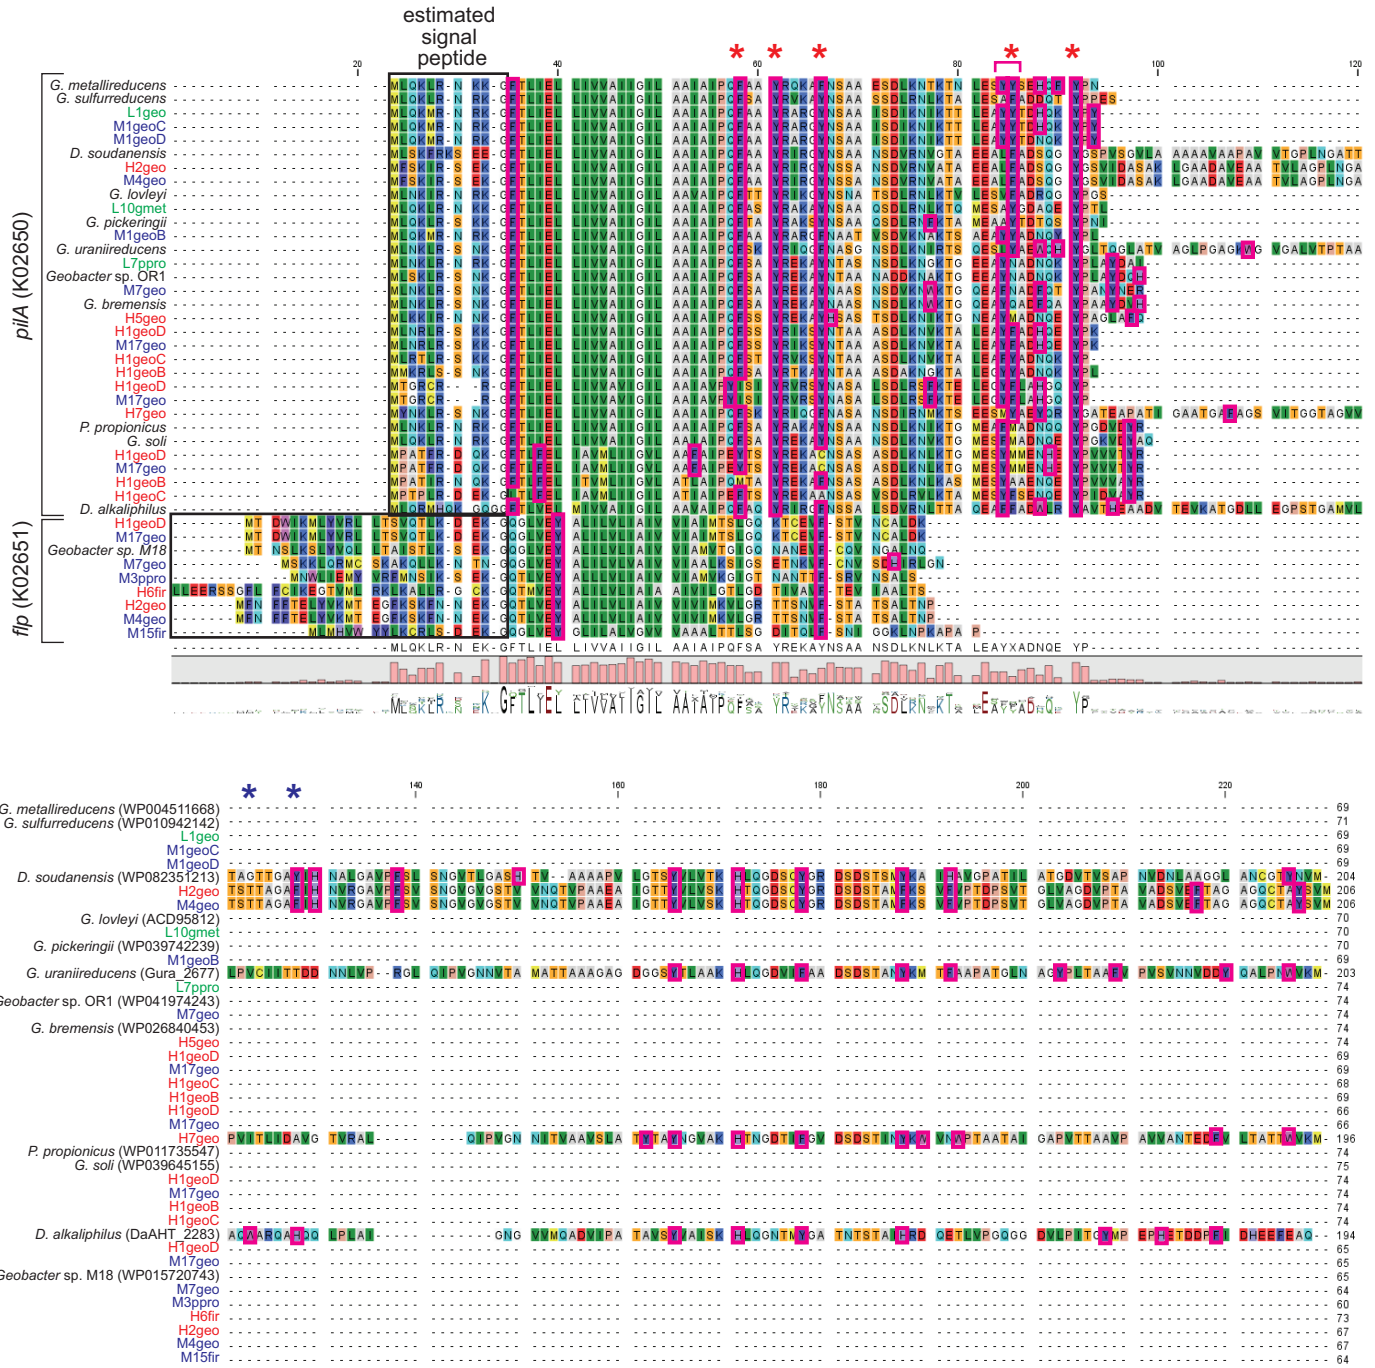

**Supplementary Fig. S20 | Alignment of PilA and Flp amino acids sequences of *Geobacter/Pelobacter* bin-genomes and the reference strains.**

Aromatic amino-acide (FYWH) placement is shown by purple rectangles, while estimated signal peptides for *pilA* (MLQKLRNRKG/ as cleavage site for model *G. sulfurreducens*) and *flp* (G/XXXXEY as cleavage site) are shown by black rectangles. Seven potential essential aromatic amino acids for conductive e-pili are marked by \* above purple rectangles. Five essential aromatic amino acids were selected based on reduced EET mutant strain Aro-5 (red \*), while two of them were selected from the comparison between confirmed e-pili from *D. alkaliphilus* and non e-pili from *G. uranireducens* (blue \*). The accession number of the reference sequences is only shown in parentheses of lower panel.

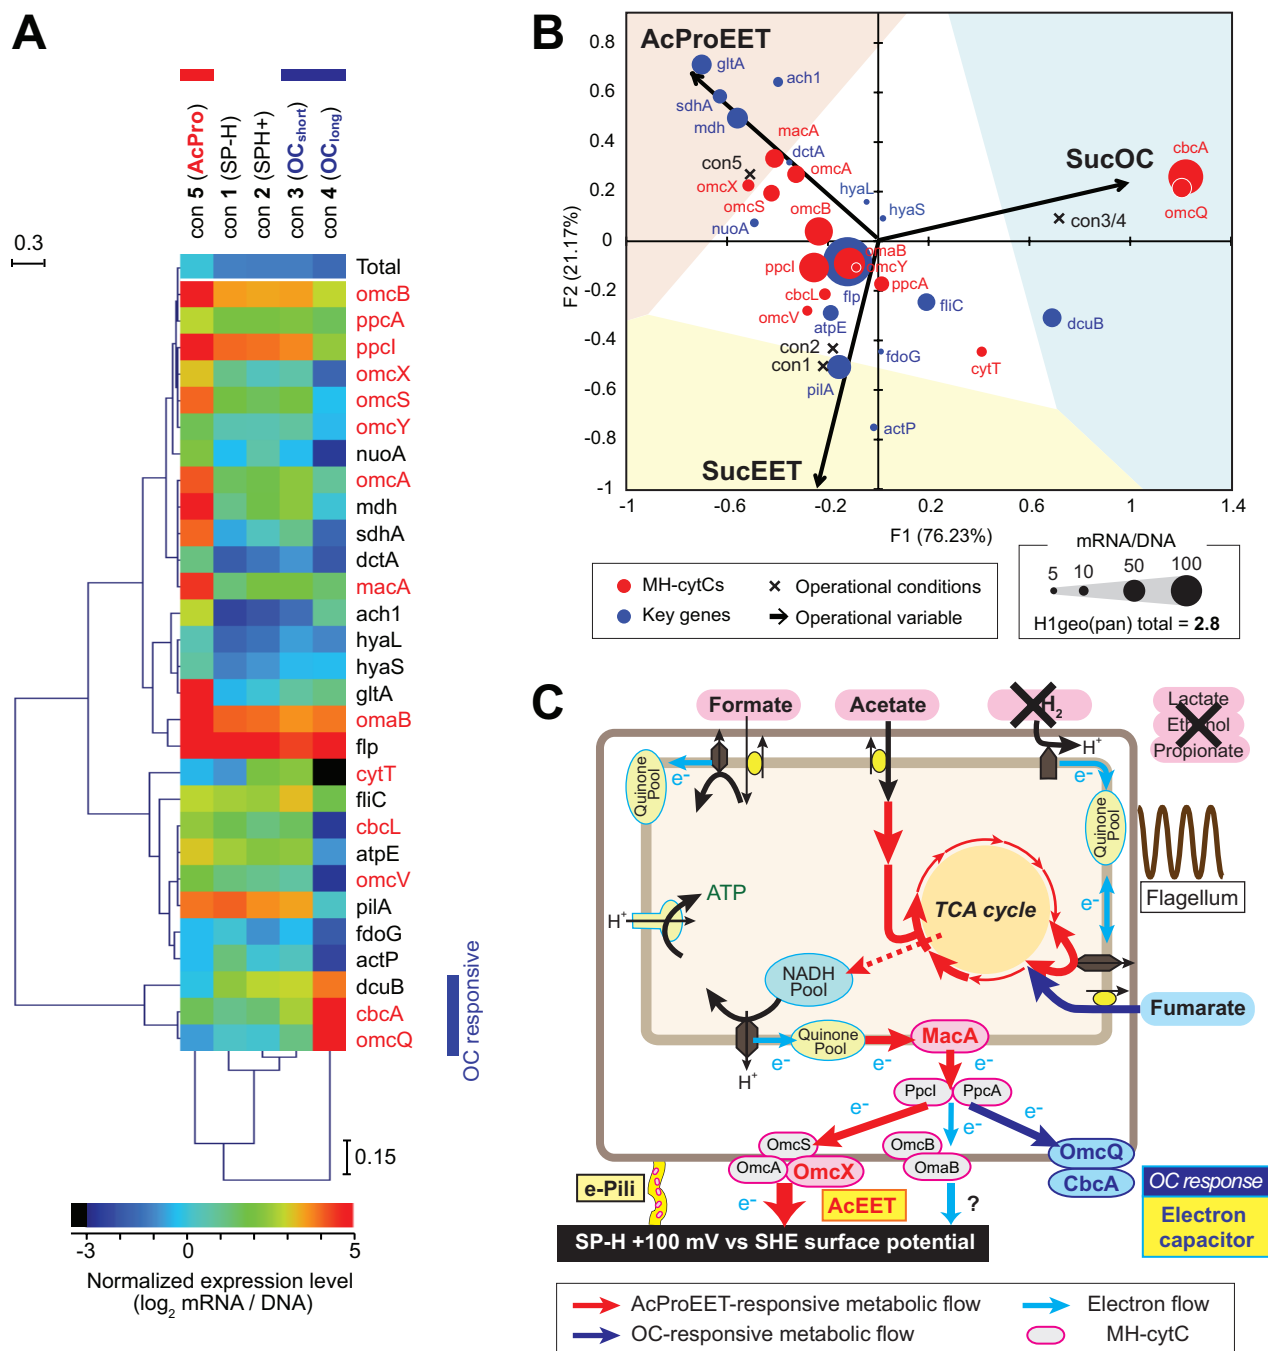

**Supplementary Fig. S21 | Gene expression profiles and the stimuli responses of EET-related metabolic pathway of H1geo(pan) microbes.**

(A) The gene expression levels of selected marker genes (refer to Supplementary Fig. S19) for each condition in the H1geo pan-genome. Genes coding multi-heme *c*-type cytochrome (MH-cytC) proteins are shown by red letter. (B) Weighted canonical correspondence analysis (wCCA) diagram shows relationship between marker genes (dots), five operational conditions (cross marks), and three operational variables (sucrose-consuming EET as SucEET, acetate/propionate-consuming EET as AcProEET, and open circuit as SucOC, black arrows). Size of dots indicates summed gene expression levels (mRNA-RPKM per DNA-RPKM) for the five conditions, while red dots indicate MH-cytCs and blue dots indicate key metabolic genes. (C) EET-related metabolic pathway map constructed by gene expression profiles in the H1geo(pan). The operational variable-associated metabolic flows and electron ( $e^-$ ) flow are highlighted by thick colored arrows. MH-cytC proteins for EET reactions are shown as oval (IDs are described inside).

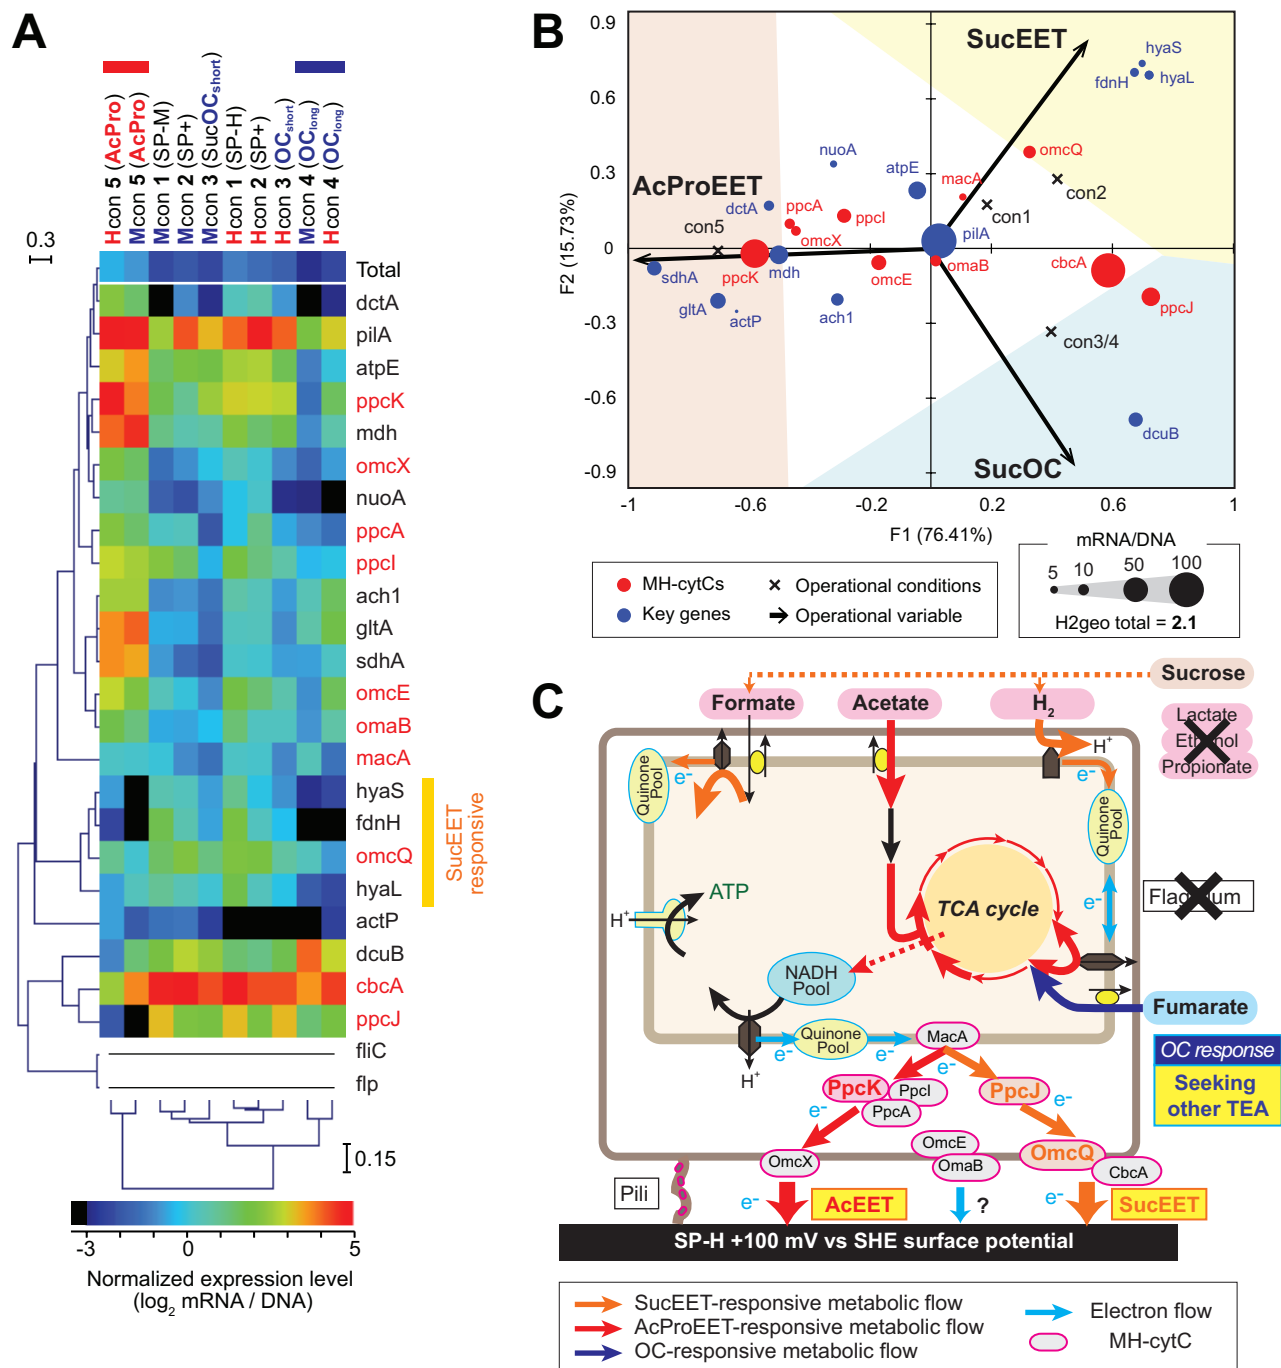

**Supplementary Fig. S22 | Gene expression profiles and the stimuli responses of EET-related metabolic pathway of OCS H2geo/M4geo.**

(A) The gene expression levels of selected marker genes (refer to Supplementary Fig. S19) for each condition in the OCS H2geo/M4geo. Genes coding multi-heme *c*-type cytochrome (MH-cytC) proteins are shown by red letter. The *fliC* and *flp* genes are not existed in the bin-genome. (B) Weighted canonical correspondence analysis (wCCA) diagram for only bin-genome H2geo shows relationship between marker genes (dots), five operational conditions (cross marks), and three operational variables (sucrose-consuming EET as SucEET, acetate/propionate-consuming EET as AcProEET, and open circuit as SucOC, black arrows). Size of dots indicates summed gene expression levels (mRNA-RPKM per DNA-RPKM) for the five conditions, while red dots indicate MH-cytCs and blue dots indicate key metabolic genes. The wCCA diagram for bin-genome M4geo is shown in Supplementary Fig. S25. (C) EET-related metabolic pathway map constructed by gene expression profiles in the OCS H2/M4geo. The operational variable-associated metabolic flows and electron ( $e^-$ ) flow are highlighted by thick colored arrows. MH-cytC proteins for EET reactions are shown as oval (IDs are described inside).

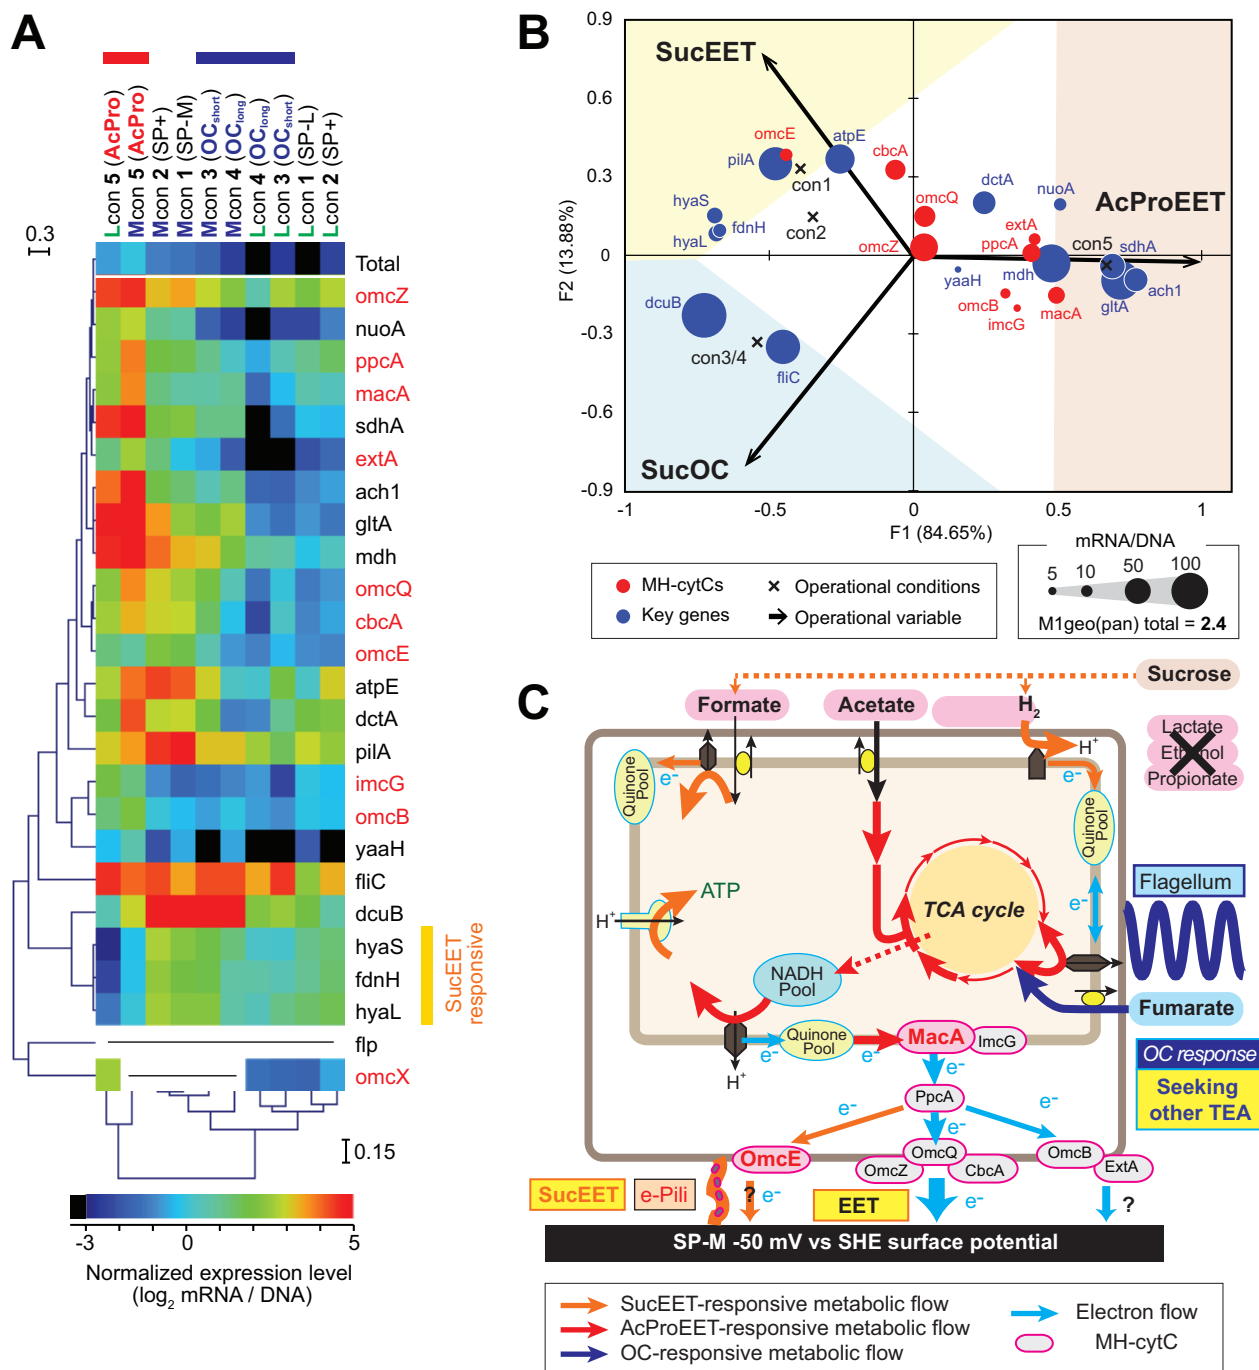

**Supplementary Fig. S23 | Gene expression profiles and the stimuli responses of EET-related metabolic pathway of OCS L1geo/M1geo(pan).**

(A) The gene expression levels of selected marker genes (refer to Supplementary Fig. S19) for each condition in the M1geo pan-genome and L1geo bin-genome. Genes coding multi-heme *c*-type cytochrome (MH-cytC) proteins are shown by red letter. The flp and omcX (only for L1geo) genes are not existed in the bin-genomes.

(B) Weighted canonical correspondence analysis (wCCA) diagram for only OCS M1geo(pan) shows relationship between marker genes (dots), five operational conditions (cross marks), and three operational variables (sucrose-consuming EET as SucEET, acetate/propionate-consuming EET as AcProEET, and open circuit as SucOC, black arrows). Size of dots indicates summed gene expression levels (mRNA-RPKM per DNA-RPKM) for the five conditions, while red dots indicate MH-cytCs and blue dots indicate key metabolic genes. The wCCA diagram for OCS L1geo is shown in Supplementary Fig. S25.

(C) EET-related metabolic pathway map constructed by gene expression profiles in the M1geo(pan)/L1geo microbe. The operational variable-associated metabolic flows and electron ( $e^-$ ) flow are highlighted by thick colored arrows. MH-cytC proteins for EET reactions are shown as oval (IDs are described inside).

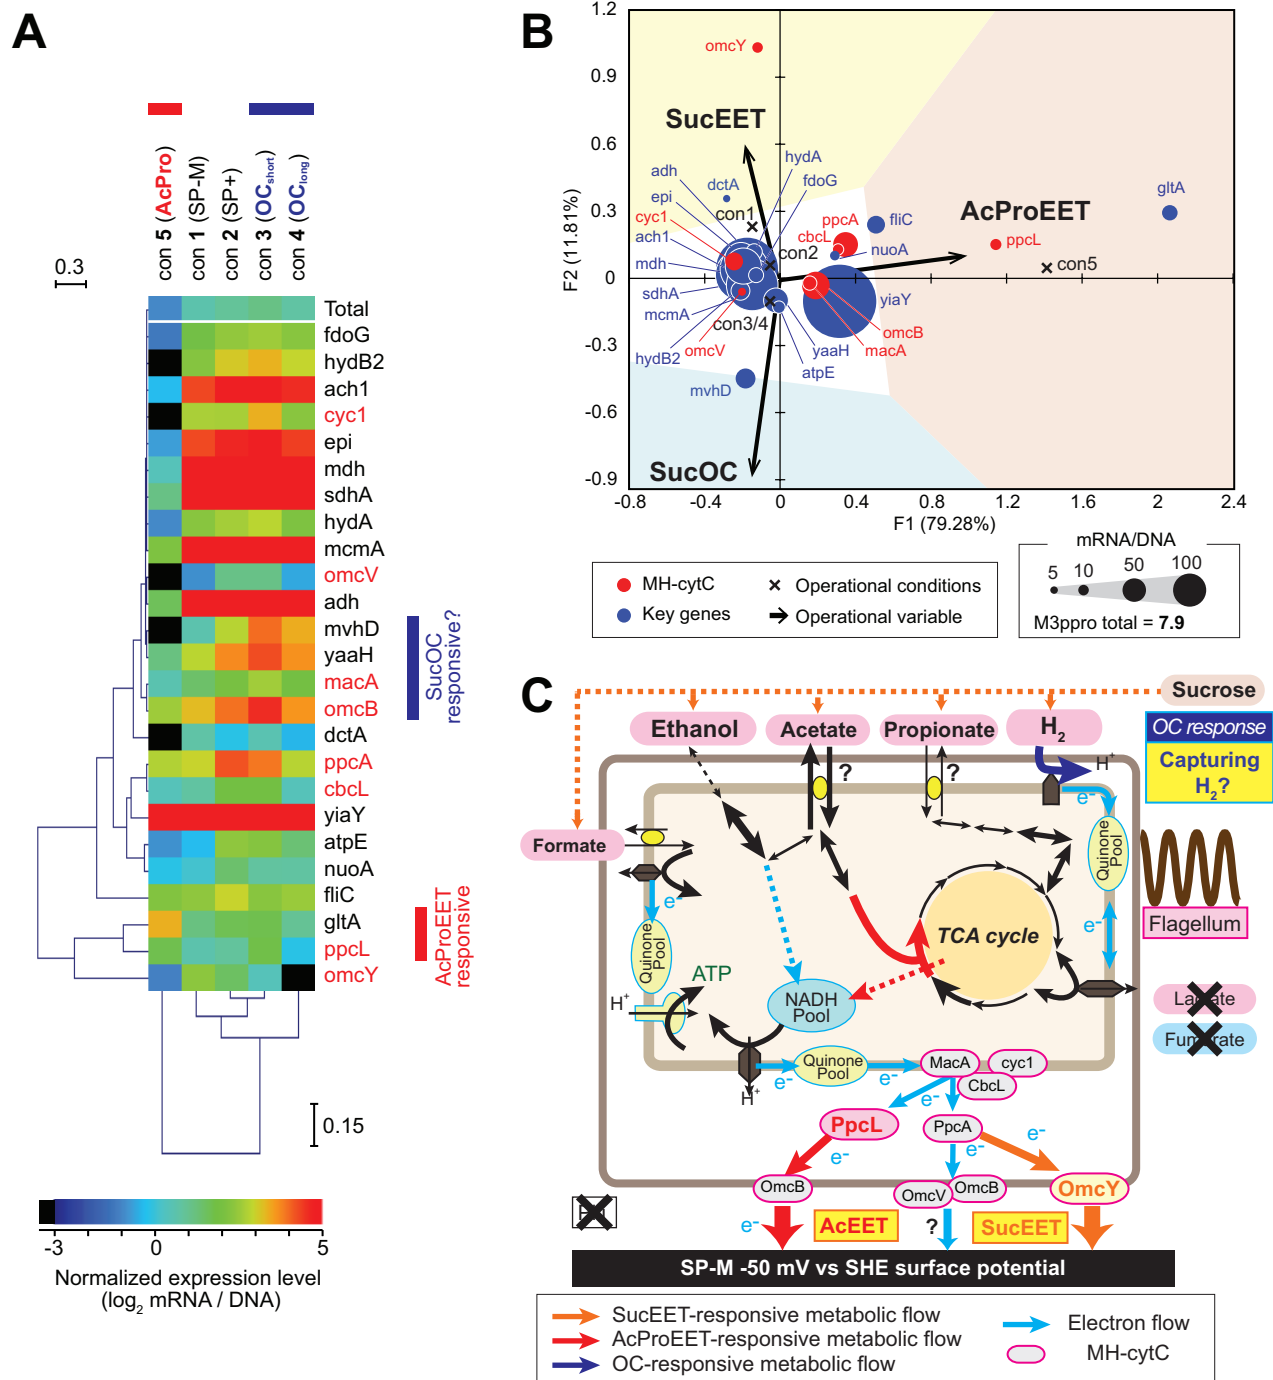

**Supplementary Fig. S24 | Gene expression profiles and the stimuli responses of EET-related metabolic pathway of OCS M3ppro.**

(A) The gene expression levels of selected marker genes (refer to Supplementary Fig. S19) for each condition in the M3ppro bin-genome. Genes coding multi-heme *c*-type cytochrome (MH-cytC) proteins are shown by red letter. (B) Weighted canonical correspondence analysis (wCCA) diagram shows relationship between marker genes (dots), five operational conditions (cross marks), and three operational variables (sucrose-consuming EET as SucEET, acetate/propionate-consuming EET as AcProEET, and open circuit as SucOC, black arrows). Size of dots indicates summed gene expression levels (mRNA-RPKM per DNA-RPKM) for the five conditions, while red dots indicate MH-cytCs and blue dots indicate key metabolic genes. (C) EET-related metabolic pathway map constructed by gene expression profiles in the OCS M3ppro. The operational variable-associated metabolic flows and electron ( $e^-$ ) flow are highlighted by thick colored arrows. MH-cytC proteins for EET reactions are shown as oval (IDs are described inside).

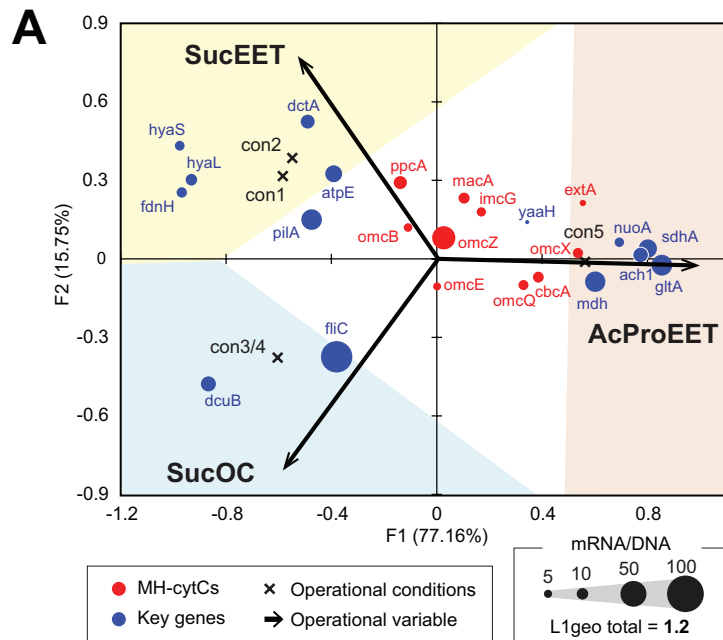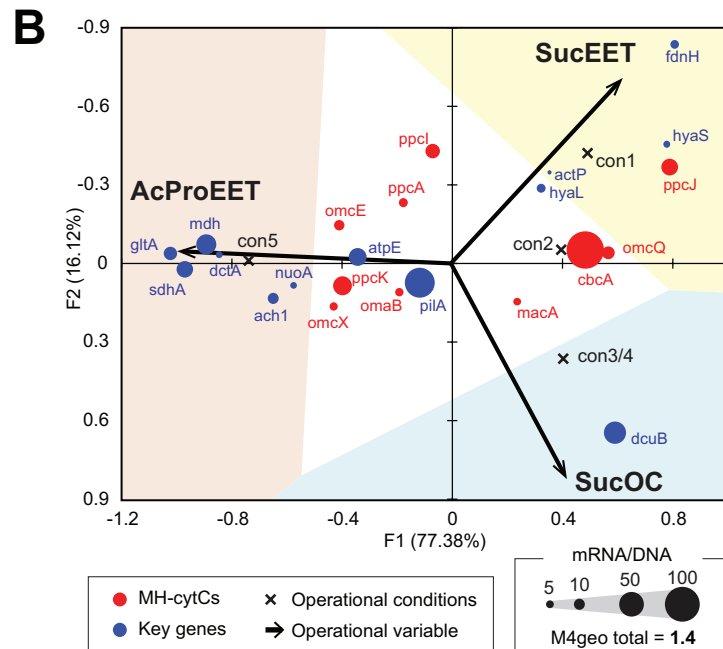

**Supplementary Fig. S25 | Weighted canonical correspondence analysis diagram for OCS L1geo and OCS M4geo.**

Weighted canonical correspondence analysis (wCCA) diagram for OCS L1geo (A) and OCS M4geo (B) shows relationship between marker genes (dots), five operational conditions (cross marks), and three operational variables (sucrose-consuming EET as SucEET, acetate/propionate-consuming EET as AcProEET, and open circuit as SucOC, black arrows). Size of dots indicates summed gene expression levels (mRNA-RPKM per DNA-RPKM) for the five conditions, while red dots indicate MH-cytCs and blue dots indicate key metabolic genes. The wCCA diagram for OCS M1geo(pan) that is same OCS of L1geo in SP-M biofilm is shown in Supplementary Fig. S23, while the wCCA diagram for OCS H2geo that is same OCS of M4geo in SP-H biofilm is shown in Supplementary Fig. S22.

Supplementary Table S1. Statistical parameters of metagenomic assemblies .

| Community   | kmer<br>(Bubble<br>size) | No. of raw<br>reads <sup>a</sup> | Filtering <sup>b</sup> | Reads<br>Mapped <sup>a</sup> | %<br>Mapped <sup>a</sup> | No.<br>Contigs | Total Bases<br>(bp) | Max contig<br>size (bp) | N50 (bp) | No.<br>contigs<br>>1 kbp |
|-------------|--------------------------|----------------------------------|------------------------|------------------------------|--------------------------|----------------|---------------------|-------------------------|----------|--------------------------|
| <b>SP-H</b> | 53 bp<br>(800 bp)        | 136,822,919                      | ≥ 200 bp               | 133,327,400                  | 97.5%                    | 66,781         | 85,176,296          | 902,175                 | 10,964   | 8,808                    |
|             |                          |                                  | ≥ 500 bp               | 131,040,285                  | 95.8%                    | 19,400         | 70,873,878          | 902,175                 | 22,768   | 8,808                    |
|             |                          |                                  | Bin-genomes            | 123,153,365                  | 90.0%                    | 3,870          | 49,410,450          | 902,382                 | 48,747   | 3,361                    |
| <b>SP-M</b> | 33 bp<br>(800 bp)        | 103,431,637                      | ≥ 200 bp               | 100,924,528                  | 97.6%                    | 88,351         | 121,290,853         | 876,693                 | 7,832    | 15,304                   |
|             |                          |                                  | ≥ 500 bp               | 99,439,728                   | 96.1%                    | 31,040         | 102,736,699         | 876,693                 | 14,395   | 15,304                   |
|             |                          |                                  | Bin-genomes            | 95,180,985                   | 92.0%                    | 9,098          | 73,311,907          | 876,693                 | 35,524   | 6,696                    |
| <b>SP-L</b> | 23 bp<br>(800 bp)        | 86,097,008                       | ≥ 200 bp               | 83,818,222                   | 97.4%                    | 110,648        | 138,095,058         | 696,411                 | 7,360    | 16,164                   |
|             |                          |                                  | ≥ 500 bp               | 82,449,067                   | 95.8%                    | 40,757         | 115,007,795         | 696,411                 | 16,307   | 16,164                   |
|             |                          |                                  | Bin-genomes            | 77,341,799                   | 89.8%                    | 6,261          | 75,303,664          | 696,411                 | 42,736   | 4,814                    |

<sup>a</sup> Numbers of reads to perform mapping raw reads back to the assembled contigs (with length cutoff 0.8 and similarity cutoff 0.8).

<sup>b</sup> Original parameter of length cut-off for CLC *de novo* assembly cell was 200 bp, while contig length cut-off of 500 bp was used for further metagenomic analyses. Stats of contigs associated with Bin-genomes for each community were also shown.

Supplementary Table S2. Summary of mRNA read counts for metatranscriptomic analyses.

| Condition <sup>a</sup>   | Time after stimulus | Total RNA reads | Total mRNA reads <sup>b</sup> | Mapped mRNA reads <sup>c</sup> |                          |
|--------------------------|---------------------|-----------------|-------------------------------|--------------------------------|--------------------------|
|                          |                     |                 |                               | ORFs (%) <sup>d</sup>          | Contigs (%) <sup>e</sup> |
| <b>SP-H</b>              |                     |                 |                               |                                |                          |
| con1 SP                  | 2 hr                | 22,634,752      | 2,125,261                     | 1,432,775 (67)                 | 1,970,198 (93)           |
| con2 SP+                 | 45 min              | 24,744,087      | 1,845,776                     | 1,246,473 (68)                 | 1,696,388 (92)           |
| con3 OC <sub>short</sub> | 45 min              | 20,492,732      | 1,570,703                     | 1,066,465 (68)                 | 1,414,017 (90)           |
| con4 OC <sub>long</sub>  | 2 hr                | 19,686,643      | 1,088,960                     | 618,827 (57)                   | 910,506 (84)             |
| con5 AcPro               | 16 hr               | 18,329,605      | 1,245,790                     | 847,595 (68)                   | 1,122,232 (90)           |
| <b>SP-M</b>              |                     |                 |                               |                                |                          |
| con1 SP                  | 2 hr                | 10,848,606      | 783,889                       | 566,246 (72)                   | 712,230 (91)             |
| con2 SP+                 | 45 min              | 10,960,172      | 1,240,115                     | 781,360 (63)                   | 1,059,975 (85)           |
| con3 OC <sub>short</sub> | 45 min              | 11,961,906      | 1,113,151                     | 707,397 (64)                   | 958,208 (86)             |
| con4 OC <sub>long</sub>  | 2 hr                | 12,825,598      | 377,062                       | 171,319 (45)                   | 295,793 (78)             |
| con5 AcPro               | 16 hr               | 13,152,708      | 887,317                       | 610,414 (69)                   | 765,433 (86)             |
| <b>SP-L</b>              |                     |                 |                               |                                |                          |
| con1 SP                  | 3 hr                | 12,302,272      | 1,041,465                     | 808,661 (78)                   | 941,517 (90)             |
| con2 SP+                 | 45 min              | 12,655,429      | 680,113                       | 524,394 (77)                   | 614,565 (90)             |
| con3 OC <sub>short</sub> | 45 min              | 12,484,744      | 733,830                       | 554,784 (76)                   | 663,430 (90)             |
| con4 OC <sub>long</sub>  | 3 hr                | 11,307,619      | 501,029                       | 270,592 (54)                   | 427,606 (85)             |
| con5 AcPro               | 16 hr               | 11,524,413      | 595,758                       | 451,531 (76)                   | 533,517 (90)             |

<sup>a</sup> Con1-Con3 were short-term responses in same batch. Suc, sucrose-consuming; AcPro, acetate/propionate-consuming.

<sup>b</sup> rRNA was subtracted from unmapped RNA reads to ORFs using SILVA database, then total mRNA reads were calculated.

<sup>c</sup> mRNA was mapped to metagenomic contigs or ORFs with the parameter as 0.95 of identity and 0.6 of length coverage.

<sup>d</sup> Numbers of mRNA reads mapped to all metagenomic ORFs. Parenthesis indicates % mRNA mapped.

<sup>e</sup> Numbers of mRNA reads mapped to all metagenomic contigs. Parenthesis indicates % mRNA mapped.

Supplementary Table S3. Summary of SP-H Bin-genomes clustered from metagenomic assembly.

| Bin-genome ID            | Taxa <sup>a</sup>       | SP-H frequency (%) <sup>b</sup> | Genome size (Mbp) | GC content (%) | Numbers of ORF <sup>c</sup> | COG-assigned ORFs | KO-assigned ORFs | Number of c-type cytochromes <sup>d</sup> | Number of contigs <sup>e</sup> | N50 (kbp) <sup>e</sup> | Longest contig (kbp) <sup>e</sup> | % Complete <sup>ness</sup> | Average coverage of contigs <sup>g</sup> |       |       |       |       |       |       |
|--------------------------|-------------------------|---------------------------------|-------------------|----------------|-----------------------------|-------------------|------------------|-------------------------------------------|--------------------------------|------------------------|-----------------------------------|----------------------------|------------------------------------------|-------|-------|-------|-------|-------|-------|
|                          |                         |                                 |                   |                |                             |                   |                  |                                           |                                |                        |                                   |                            | Hcon1                                    | Hcon2 | Hcon3 | Hcon4 | Hcon5 | Mcon1 | Lcon1 |
| <b>H1geoA</b>            |                         | -                               | 2.75              | 61             | 2960                        | 2208              | 2164             | 64 (44)                                   | 586                            | 7.0                    | 27.4                              | <b>93</b>                  | 77                                       | 82    | 66    | 293   | 66    | 1     | 0     |
| <b>H1geoB</b>            | <i>δ-Proteobacteria</i> | <b>18.1</b>                     | 1.85              | 60             | 2003                        | 1292              | 1268             | 57 (35)                                   | 458                            | 7.2                    | 54.8                              | 13                         | 54                                       | 60    | 34    | 214   | 37    | 0     | 0     |
| <b>H1geoC</b>            |                         | <b>13.3</b>                     | 1.93              | 61             | 2121                        | 1329              | 1287             | 60 (41)                                   | 642                            | 4.7                    | 80.8                              | 15                         | 33                                       | 32    | 46    | 110   | 40    | 0     | 0     |
| <b>H1geoD</b>            |                         | <b>4.7</b>                      | 3.25              | 61             | 3525                        | 2480              | 2442             | 79 (44)                                   | 901                            | 6.0                    | 31.9                              | 26                         | 16                                       | 13    | 10    | 44    | 14    | 2     | 0     |
| <b>H2geo</b>             | <i>δ-Proteobacteria</i> | <b>14.8</b>                     | 3.46              | 57             | 3098                        | 2322              | 2212             | 99 (67)                                   | <b>36</b>                      | <b>377.3</b>           | <b>500.1</b>                      | <b>98</b>                  | 42                                       | 36    | 46    | 137   | 40    | 15    | 0     |
| <b>H3lac</b>             | <i>Firmicutes</i>       | <b>12.6</b>                     | 1.91              | 38             | 1848                        | 1476              | 1370             | 5 (2)                                     | <b>54</b>                      | <b>63.7</b>            | <b>136.0</b>                      | <b>98</b>                  | 30                                       | 31    | 36    | 107   | 47    | 23    | 2     |
| <b>H4act</b>             | <i>Actinomycetes</i>    | <b>11.1</b>                     | 3.42              | 70             | 3271                        | 2469              | 2257             | 10 (1)                                    | <b>74</b>                      | <b>100.2</b>           | <b>208.3</b>                      | <b>97</b>                  | 33                                       | 33    | 36    | 80    | 29    | 9     | 0     |
| <b>H5geo</b>             | <i>δ-Proteobacteria</i> | <b>7.2</b>                      | 4.23              | 54             | 3684                        | 2740              | 2621             | 104 (70)                                  | <b>35</b>                      | <b>357.5</b>           | <b>602.7</b>                      | <b>98</b>                  | 18                                       | 21    | 15    | 73    | 24    | 0     | 0     |
| <b>H6fir</b>             | <i>Firmicutes</i>       | <b>4.7</b>                      | 3.13              | 50             | 3002                        | 2458              | 2298             | 14 (0)                                    | <b>197</b>                     | 29.2                   | <b>135.6</b>                      | <b>98</b>                  | 11                                       | 11    | 13    | 35    | 20    | 6     | 0     |
| <b>H7geo</b>             | <i>δ-Proteobacteria</i> | <b>4.6</b>                      | 3.47              | 51             | 3191                        | 2470              | 2368             | 85 (50)                                   | <b>107</b>                     | <b>60.0</b>            | <b>281.2</b>                      | <b>95</b>                  | 11                                       | 12    | 10    | 35    | 20    | 3     | 0     |
| <b>H8spi</b>             | <i>Spirochaeta</i>      | <b>2.8</b>                      | 3.22              | 59             | 2939                        | 2206              | 2054             | 10 (0)                                    | <b>35</b>                      | <b>200.4</b>           | <b>450.3</b>                      | <b>96</b>                  | 9                                        | 9     | 7     | 21    | 8     | 5     | 7     |
| <b>H9bac</b>             | <i>Bacteroidetes</i>    | <b>1.5</b>                      | 3.28              | 39             | 2706                        | 1820              | 1725             | 7 (0)                                     | <b>66</b>                      | <b>83.7</b>            | <b>307.7</b>                      | <b>98</b>                  | 5                                        | 4     | 4     | 10    | 5     | 0     | 1     |
| <b>H10eps</b>            | <i>ε-Proteobacteria</i> | <b>1.3</b>                      | 2.72              | 39             | 2712                        | 2183              | 2084             | 55 (20)                                   | <b>22</b>                      | <b>216.0</b>           | <b>902.4</b>                      | <b>99</b>                  | 4                                        | 4     | 4     | 8     | 4     | 3     | 0     |
| <b>H11bac</b>            | <i>Bacteroidetes</i>    | <b>0.8</b>                      | 4.25              | 39             | 3275                        | 2180              | 2130             | 17 (5)                                    | <b>191</b>                     | 31.1                   | <b>110.8</b>                      | <b>97</b>                  | 3                                        | 2     | 2     | 4     | 2     | 1     | 1     |
| <b>H12unc</b>            | <i>Acidobacteria</i>    | <b>1.0</b>                      | 4.55              | 68             | 4398                        | 3121              | 2884             | 31 (16)                                   | 311                            | 23.4                   | <b>113.0</b>                      | <b>97</b>                  | 3                                        | 3     | 2     | 6     | 4     | 1     | 5     |
| H3lacP                   | Plasmid                 | -                               | 0.28              | 34             | 341                         | 128               | 109              | 0 (0)                                     | 28                             | 18.6                   | 25.7                              | 0                          | 18                                       | 19    | 23    | 65    | 27    | 23    | 1     |
| H4actB                   | Plasmid?                | -                               | 1.02              | 66             | 1021                        | 502               | 444              | 3 (0)                                     | 109                            | 27.5                   | 82.2                              | 3                          | 15                                       | 16    | 17    | 38    | 14    | 3     | 0     |
| H6firP                   | Plasmid                 | -                               | 0.14              | 42             | 137                         | 85                | 77               | 1 (0)                                     | 11                             | 38.3                   | 43.6                              | 0                          | 10                                       | 11    | 12    | 34    | 18    | 0     | 0     |
| H6firP2                  | Plasmid                 | -                               | 0.05              | 45             | 51                          | 33                | 30               | 0 (0)                                     | 4                              | 17.4                   | 19.9                              | 0                          | 11                                       | 11    | 13    | 35    | 19    | 1     | 0     |
| H7geoP                   | Plasmid                 | -                               | 0.52              | 48             | 566                         | 233               | 229              | 6 (2)                                     | 30                             | 99.8                   | <b>199.0</b>                      | <b>3</b>                   | 9                                        | 10    | 8     | 23    | 14    | 0     | 0     |
| TOTAL in Bin-genomes     |                         | <b>98.5</b>                     | 49.44             | -              | 46849                       | 33735             | 32053            | 707 (397)                                 | 3897                           | 48.7                   | 902.4                             | -                          | 411                                      | 420   | 403   | 1374  | 450   | 97    | 18    |
| TOTAL in Sp-H metagenome |                         | <b>100.0</b>                    | 70.87             | -              | 82776                       | 53951             | 52553            | 911 (478)                                 | 19400                          | 22.8                   | 902.4                             | -                          | na                                       | na    | na    | na    | na    | na    | na    |

<sup>a</sup> Taxonomy used for bin-genome clustering. Clusters potentially assigned as plasmid were separated based on their coverage differences and less KO assignment.

<sup>b</sup> Relative frequency within the SP-H metagenome was calculated based on the coverage of 17 universal single-copied core genes. Micro-diversity of H1geoA-D was separately considered as to one core gene group (H1geoA) and three subgroups (H1geoB-D).

<sup>c</sup> Numbers of ORFs have potential errors in metagenomic ORF calling because of incomplete assemblies.

<sup>d</sup> Number of ORFs assigned as c-type cytochrome by CXXCH domain search. Numbers of multi-heme c-type cytochromes are described in parentheses.

<sup>e</sup> Bold letters indicate well-clustered bin-genomes in terms of the parameters.

<sup>f</sup> Values were calculated from frequency of KO assignment to universal single-copied gene family lists (Supplementary Table S5).

<sup>g</sup> Raw reads for each condition were separately mapped to SP-H contigs by using similarity cut-off by 0.95 and length cut-off by 0.7.

Supplementary Table S4. Summary of SP-M Bin-genomes clustered from metagenomic assembly.

| Bin-genome ID                   | Taxa <sup>a</sup>       | SP-M frequency (%) <sup>b</sup> | Genome size (Mbp) | GC content (%) | Numbers of ORFs <sup>c</sup> | COG- assigned ORFs | KO- assigned ORFs | Number of c-type cytochromes <sup>d</sup> | Number of contigs <sup>e</sup> | N50 (kbp) <sup>e</sup> | Longest contig (kbp) <sup>e</sup> | % Complete-ness <sup>f</sup> | Average coverage of contigs <sup>g</sup> |            |            |            |            |            |            |
|---------------------------------|-------------------------|---------------------------------|-------------------|----------------|------------------------------|--------------------|-------------------|-------------------------------------------|--------------------------------|------------------------|-----------------------------------|------------------------------|------------------------------------------|------------|------------|------------|------------|------------|------------|
|                                 |                         |                                 |                   |                |                              |                    |                   |                                           |                                |                        |                                   |                              | Mcon1                                    | Mcon2      | Mcon3      | Mcon4      | Mcon5      | Hcon1      | Lcon1      |
| <b>M1geoA</b>                   |                         | -                               | 3.01              | 55             | 2915                         | 2176               | 2037              | 71 (44)                                   | 287                            | 18.6                   | 54.3                              | 88                           | 123                                      | 117        | 127        | 137        | 128        | 0          | 103        |
| <b>M1geoB</b>                   | <b>δ-Proteobacteria</b> | <b>32.1</b>                     | 1.63              | 53             | 1675                         | 962                | 877               | 47 (31)                                   | 337                            | 9.5                    | 76.9                              | 8                            | 98                                       | 75         | 93         | 100        | 107        | 0          | 18         |
| <b>M1geoC</b>                   |                         | <b>14.5</b>                     | 1.39              | 54             | 1449                         | 771                | 736               | 38 (28)                                   | 421                            | 6.1                    | 38.7                              | 9                            | 33                                       | 55         | 47         | 49         | 30         | 0          | 127        |
| <b>M1geoD</b>                   |                         | <b>6.2</b>                      | 2.17              | 54             | 2235                         | 1316               | 1199              | 49 (30)                                   | 465                            | 8.8                    | 61.5                              | 19                           | 15                                       | 30         | 15         | 22         | 8          | 0          | 4          |
| <b>M2lac</b>                    | <i>Firmicutes</i>       | <b>12.7</b>                     | 2.24              | 36             | 2226                         | 1613               | 1451              | 7 (2)                                     | <b>66</b>                      | <b>124.7</b>           | <b>205.1</b>                      | <b>98</b>                    | 27                                       | 40         | 36         | 57         | 40         | 28         | 1          |
| <b>M3ppro</b>                   | <b>δ-Proteobacteria</b> | <b>6.4</b>                      | 4.89              | 52             | 4511                         | 3184               | 2844              | 59 (27)                                   | <b>109</b>                     | <b>102.9</b>           | <b>254.3</b>                      | <b>95</b>                    | 15                                       | 12         | 17         | 22         | 28         | 0          | 0          |
| <b>M4geo</b>                    | <b>δ-Proteobacteria</b> | <b>4.8</b>                      | 3.46              | 56             | 3102                         | 2320               | 2136              | 99 (67)                                   | <b>42</b>                      | <b>442.8</b>           | <b>876.7</b>                      | <b>98</b>                    | 17                                       | 15         | 19         | 23         | 15         | 45         | 0          |
| <b>M5fir</b>                    | <i>Firmicutes</i>       | <b>3.2</b>                      | 3.46              | 50             | 3283                         | 2583               | 2317              | 19 (0)                                    | <b>37</b>                      | <b>151.1</b>           | <b>295.3</b>                      | <b>97</b>                    | 7                                        | 8          | 9          | 12         | 13         | 9          | 0          |
| <b>M6act</b>                    | <i>Actinomycetes</i>    | <b>3.5</b>                      | 3.31              | 70             | 3182                         | 2410               | 2136              | 10 (1)                                    | 217                            | 26.7                   | 78.3                              | <b>97</b>                    | 9                                        | 12         | 11         | 8          | 9          | 32         | 0          |
| <b>M7geo</b>                    | <b>δ-Proteobacteria</b> | <b>1.8</b>                      | 4.81              | 57             | 4223                         | 3064               | 2827              | 107 (64)                                  | <b>90</b>                      | <b>113.7</b>           | <b>326.9</b>                      | <b>96</b>                    | 3                                        | 4          | 5          | 1          | 10         | 2          | 0          |
| <b>M8spi</b>                    | <i>Spirochaeta</i>      | <b>2.0</b>                      | 3.20              | 61             | 2874                         | 2189               | 1969              | 10 (0)                                    | <b>48</b>                      | <b>114.0</b>           | <b>302.6</b>                      | <b>95</b>                    | 6                                        | 5          | 6          | 6          | 5          | 9          | 8          |
| <b>M9unc</b>                    | <i>Acidobacteria</i>    | <b>1.3</b>                      | 3.26              | 68             | 3131                         | 2353               | 2078              | 40 (15)                                   | <b>126</b>                     | 44.9                   | <b>155.6</b>                      | 87                           | 3                                        | 4          | 6          | 1          | 6          | 0          | 0          |
| <b>M10bac</b>                   | <i>Bacteroidetes</i>    | <b>1.7</b>                      | 3.56              | 45             | 3037                         | 2169               | 2012              | 7 (0)                                     | <b>189</b>                     | 44.0                   | 94.2                              | <b>99</b>                    | 3                                        | 2          | 3          | 4          | 4          | 0          | 7          |
| <b>M11eps</b>                   | <b>ε-Proteobacteria</b> | <b>1.1</b>                      | 2.78              | 38             | 2797                         | 2218               | 2016              | 53 (18)                                   | <b>30</b>                      | <b>159.5</b>           | <b>531.5</b>                      | <b>99</b>                    | 3                                        | 3          | 3          | 3          | 4          | 3          | 0          |
| <b>M12geo</b>                   | <b>δ-Proteobacteria</b> | <b>1.4</b>                      | 3.72              | 51             | 3692                         | 2772               | 2527              | 90 (56)                                   | <b>78</b>                      | <b>98.0</b>            | <b>284.1</b>                      | <b>96</b>                    | 3                                        | 1          | 3          | 3          | 5          | 10         | 0          |
| <b>M13tol</b>                   | <b>γ-Proteobacteria</b> | <b>1.9</b>                      | 2.96              | 49             | 2766                         | 2399               | 2293              | 9 (1)                                     | <b>64</b>                      | <b>114.1</b>           | <b>212.7</b>                      | <b>98</b>                    | 4                                        | 1          | 6          | 9          | 5          | 0          | 8          |
| <b>M14spi</b>                   | <i>Spirochaeta</i>      | <b>1.0</b>                      | 3.11              | 61             | 2954                         | 2290               | 2078              | 12 (2)                                    | <b>147</b>                     | 34.9                   | <b>102.9</b>                      | <b>94</b>                    | 4                                        | 3          | 3          | 3          | 2          | 0          | 0          |
| <b>M15fir</b>                   | <i>Firmicutes</i>       | <b>0.7</b>                      | 4.44              | 61             | 4820                         | 3531               | 3197              | 22 (2)                                    | 412                            | 17.0                   | 60.5                              | <b>96</b>                    | 2                                        | 2          | 2          | 2          | 2          | 0          | 0          |
| <b>M17geo</b>                   | <b>δ-Proteobacteria</b> | <b>0.4</b>                      | 4.55              | 59             | 5327                         | 3784               | 3626              | 112 (66)                                  | 1051                           | 7.2                    | 41.4                              | 63                           | 2                                        | 1          | 2          | 1          | 2          | 39         | 0          |
| <b>M18tol</b>                   | <b>γ-Proteobacteria</b> | <b>0.1</b>                      | 2.11              | 48             | 3324                         | 2543               | 2541              | 5 (0)                                     | 1607                           | 1.5                    | 11.3                              | 49                           | 1                                        | 0          | 1          | 1          | 2          | 1          | 51         |
| <b>M19bac</b>                   | <i>Bacteroidetes</i>    | <b>0.4</b>                      | 3.84              | 39             | 3393                         | 2202               | 2063              | 17 (5)                                    | 704                            | 7.8                    | 29.7                              | <b>92</b>                    | 1                                        | 1          | 1          | 1          | 1          | 3          | 1          |
| <b>M20fir</b>                   | <i>Firmicutes</i>       | <b>0.1</b>                      | 0.85              | 54             | 1132                         | 851                | 781               | 2 (0)                                     | 323                            | 3.9                    | 13.4                              | 29                           | 1                                        | 1          | 1          | 2          | 1          | 0          | 1          |
| <b>M21unc</b>                   | Unclassified            | <b>0.2</b>                      | 2.69              | 68             | 4182                         | 2665               | 2370              | 25 (12)                                   | 1952                           | 1.6                    | 8.2                               | 63                           | 1                                        | 1          | 1          | 1          | 1          | 3          | 5          |
| <b>M5firP</b>                   | <i>Firmicutes</i>       | -                               | 0.06              | 48             | 69                           | 25                 | 23                | 1 (0)                                     | 3                              | 30.4                   | 30.4                              | 0                            | 8                                        | 8          | 11         | 13         | 14         | 0          | 0          |
| <b>M16actB</b>                  | <i>Actinomycetes</i>    | -                               | 1.34              | 68             | 1363                         | 713                | 584               | 1 (0)                                     | 291                            | 8.5                    | 57.7                              | 3                            | 4                                        | 5          | 4          | 3          | 4          | 8          | 0          |
| <b>TOTAL in Bin-genomes</b>     |                         | <b>97.6</b>                     | <b>72.82</b>      | -              | <b>73662</b>                 | <b>53103</b>       | <b>48718</b>      | <b>912 (471)</b>                          | <b>9096</b>                    | <b>35.5</b>            | <b>876.7</b>                      | -                            | <b>394</b>                               | <b>403</b> | <b>432</b> | <b>485</b> | <b>447</b> | <b>192</b> | <b>336</b> |
| <b>TOTAL in Sp-M metagenome</b> |                         | <b>100.0</b>                    | <b>102.74</b>     | -              | <b>119295</b>                | <b>80485</b>       | <b>74089</b>      | <b>1114 (549)</b>                         | <b>31040</b>                   | <b>14.4</b>            | <b>876.7</b>                      | -                            | <b>na</b>                                | <b>na</b>  | <b>na</b>  | <b>na</b>  | <b>na</b>  | <b>na</b>  | <b>na</b>  |

<sup>a</sup> Taxonomy used for bin-genome clustering. Clusters potentially assigned as plasmid were separated based on their coverage differences and less KO assignment.

<sup>b</sup> Relative frequency within the SP-M metagenome was calculated based on the coverage of 17 universal single-copied core genes. Micro-diversity of M1geoA-D was separately considered as to one core gene group (M1geoA) and three subgroups (M1geoB-D).

<sup>c</sup> Numbers of ORFs have potential errors in metagenomic ORF calling because of incomplete assemblies.

<sup>d</sup> Number of ORFs assigned as c-type cytochrome by CXXCH domain search. Numbers of multi-heme c-type cytochromes are described in parentheses.

<sup>e</sup> Bold letters indicate well-clustered bin-genomes in terms of the parameters.

<sup>f</sup> Values were calculated from frequency of KO assignment to universal single-copied gene family lists (Supplementary Table S6).

<sup>g</sup> Raw reads for each condition were separately mapped to SP-M contigs by using similarity cut-off by 0.95 and length cut-off by 0.7.

Supplementary Table S5. Summary of SP-L Bin-genomes clustered from metagenomic assembly.

| Bin-genome ID            | Taxa <sup>a</sup>       | SP-L frequency (%) <sup>b</sup> | Genome size (Mbp) | GC content (%) | Numbers of ORFs <sup>c</sup> | COG- assigned ORFs | KO- assigned ORFs | Number of c-type cytochromes <sup>d</sup> | Number of contigs <sup>e</sup> | N50 (kbp) <sup>e</sup> | Longest contig (kbp) <sup>e</sup> | % Complete-ness <sup>f</sup> | Average coverage of contigs <sup>g</sup> |       |       |       |       |       |       |
|--------------------------|-------------------------|---------------------------------|-------------------|----------------|------------------------------|--------------------|-------------------|-------------------------------------------|--------------------------------|------------------------|-----------------------------------|------------------------------|------------------------------------------|-------|-------|-------|-------|-------|-------|
|                          |                         |                                 |                   |                |                              |                    |                   |                                           |                                |                        |                                   |                              | Lcon1                                    | Lcon2 | Lcon3 | Lcon4 | Lcon5 | Hcon1 | Mcon1 |
| L1geo                    | <i>δ-Proteobacteria</i> | 24.3                            | 4.44              | 54             | 3845                         | 2792               | 2582              | 106 (70)                                  | 42                             | 268.4                  | 696.4                             | 95                           | 159                                      | 102   | 61    | 65    | 68    | 0     | 92    |
| L2tol                    | <i>γ-Proteobacteria</i> | 28.9                            | 3.41              | 49             | 3169                         | 2692               | 2543              | 8 (1)                                     | 26                             | 279.8                  | 525.8                             | 99                           | 69                                       | 119   | 135   | 106   | 86    | 1     | 1     |
| L3tol                    | <i>γ-Proteobacteria</i> | 7.7                             | 3.47              | 45             | 3170                         | 2659               | 2528              | 11 (1)                                    | 63                             | 147.7                  | 358.1                             | 73                           | 19                                       | 19    | 30    | 27    | 22    | 0     | 0     |
| L4bac                    | <i>Bacteroidetes</i>    | 5.2                             | 3.40              | 42             | 2846                         | 2128               | 1947              | 18 (5)                                    | 361                            | 16.6                   | 62.3                              | 94                           | 8                                        | 12    | 15    | 16    | 14    | 0     | 0     |
| L5met                    | <i>Euryarchaeota</i>    | 4.4                             | 1.47              | 51             | 1670                         | 1305               | 1172              | 7 (0)                                     | 225                            | 11.6                   | 45.9                              | 94                           | 6                                        | 13    | 19    | 9     | 6     | 0     | 0     |
| L6fir                    | <i>Firmicutes</i>       | 4.4                             | 1.12              | 35             | 1056                         | 774                | 705               | 5 (0)                                     | 15                             | 143.9                  | 253.4                             | 95                           | 20                                       | 11    | 16    | 17    | 22    | 0     | 0     |
| L7ppro                   | <i>δ-Proteobacteria</i> | 2.7                             | 3.82              | 58             | 3435                         | 2646               | 2391              | 25 (11)                                   | 84                             | 82.8                   | 347.8                             | 88 <sup>h</sup>              | 4                                        | 10    | 12    | 12    | 12    | 0     | 0     |
| L8spi                    | <i>Spirochaeta</i>      | 3.1                             | 2.84              | 61             | 2600                         | 2012               | 1816              | 7 (0)                                     | 102                            | 45.5                   | 140.7                             | 95                           | 9                                        | 9     | 9     | 6     | 5     | 4     | 3     |
| L9bac                    | <i>Bacteroidetes</i>    | 2.8                             | 3.96              | 45             | 3305                         | 2290               | 2099              | 7 (0)                                     | 24                             | 228.4                  | 556.0                             | 99                           | 8                                        | 9     | 9     | 6     | 6     | 0     | 3     |
| L10met                   | <i>δ-Proteobacteria</i> | 2.1                             | 3.51              | 57             | 3216                         | 2445               | 2235              | 96 (61)                                   | 91                             | 77.0                   | 222.8                             | 97                           | 2                                        | 11    | 8     | 4     | 2     | 0     | 0     |
| L11unc                   | <i>Acidobacteria</i>    | 2.1                             | 4.50              | 68             | 3973                         | 2947               | 2598              | 33 (16)                                   | 91                             | 90.6                   | 319.3                             | 95                           | 6                                        | 8     | 8     | 7     | 6     | 3     | 1     |
| L12lac                   | <i>Firmicutes</i>       | 2.2                             | 1.95              | 38             | 1905                         | 1489               | 1361              | 7 (2)                                     | 69                             | 55.5                   | 188.4                             | 97                           | 2                                        | 3     | 4     | 15    | 18    | 28    | 21    |
| L13fir                   | <i>Firmicutes</i>       | 1.1                             | 3.43              | 45             | 3234                         | 2601               | 2319              | 16 (0)                                    | 177                            | 35.2                   | 173.9                             | 98                           | 2                                        | 3     | 3     | 4     | 8     | 0     | 0     |
| L14bac                   | <i>Bacteroidetes</i>    | 1.4                             | 3.90              | 39             | 3230                         | 2237               | 2053              | 9 (3)                                     | 308                            | 28.8                   | 98.8                              | 96                           | 2                                        | 3     | 4     | 4     | 5     | 0     | 0     |
| L15bac                   | <i>Bacteroidetes</i>    | 0.9                             | 3.13              | 37             | 2586                         | 1770               | 1609              | 12 (2)                                    | 25                             | 264.4                  | 437.3                             | 97                           | 2                                        | 2     | 2     | 5     | 4     | 0     | 0     |
| L16bac                   | <i>Bacteroidetes</i>    | 0.7                             | 3.94              | 39             | 3092                         | 2098               | 1943              | 17 (5)                                    | 251                            | 22.7                   | 75.3                              | 92                           | 1                                        | 2     | 2     | 2     | 2     | 3     | 1     |
| L17bac                   | <i>Bacteroidetes</i>    | 0.6                             | 3.85              | 37             | 3311                         | 2243               | 2120              | 11 (2)                                    | 326                            | 20.0                   | 107.8                             | 86                           | 2                                        | 1     | 1     | 2     | 4     | 0     | 0     |
| L18ver                   | <i>Verrucomicrobia</i>  | 0.7                             | 6.49              | 57             | 5195                         | 3458               | 3087              | 51 (20)                                   | 411                            | 26.4                   | 102.5                             | 92                           | 3                                        | 2     | 3     | 1     | 3     | 0     | 0     |
| L19bac                   | <i>Bacteroidetes</i>    | 0.3                             | 3.33              | 38             | 3323                         | 2063               | 1892              | 9 (2)                                     | 725                            | 7.1                    | 42.7                              | 80                           | 1                                        | 1     | 1     | 1     | 1     | 0     | 0     |
| L20tol                   | <i>γ-Proteobacteria</i> | 0.1                             | 1.54              | 41             | 2725                         | 2004               | 2115              | 4 (1)                                     | 1133                           | 1.6                    | 14.2                              | 29                           | 3                                        | 1     | 1     | 1     | 3     | 0     | 3     |
| L20tolB                  | <i>γ-Proteobacteria</i> | 0.0                             | 1.06              | 42             | 1934                         | 1359               | 1399              | 2 (0)                                     | 860                            | 1.3                    | 27.1                              | 17                           | 2                                        | 1     | 1     | 1     | 2     | 0     | 0     |
| L21met                   | <i>Euryarchaeota</i>    | 0.3                             | 1.00              | 50             | 1336                         | 958                | 855               | 7 (0)                                     | 416                            | 3.4                    | 16.3                              | 40                           | 2                                        | 3     | 4     | 2     | 1     | 0     | 0     |
| L22fir                   | <i>Firmicutes</i>       | 1.3                             | 2.38              | 40             | 2335                         | 1899               | 1728              | 11 (0)                                    | 43                             | 143.9                  | 363.6                             | 96                           | 3                                        | 3     | 4     | 5     | 7     | 0     | 0     |
| L23elu                   | <i>Elusimicrobia</i>    | 0.7                             | 1.39              | 44             | 1312                         | 993                | 884               | 3 (1)                                     | 79                             | 30.0                   | 65.1                              | 92                           | 2                                        | 1     | 1     | 4     | 3     | 0     | 0     |
| L24fir                   | <i>Firmicutes</i>       | 0.3                             | 1.78              | 39             | 1906                         | 1319               | 1166              | 8 (0)                                     | 300                            | 7.9                    | 24.3                              | 87                           | 2                                        | 1     | 1     | 1     | 1     | 0     | 0     |
| L12lacP                  | Plasmid                 | -                               | 0.25              | 34             | 300                          | 123                | 86                | 1 (0)                                     | 39                             | 13.0                   | 25.6                              | 0                            | 1                                        | 1     | 2     | 6     | 6     | 20    | 26    |
| TOTAL in Bin-genomes     |                         | 98.2                            | 75.36             | -              | 70009                        | 51304              | 47233             | 489 (201)                                 | 6261                           | 42.7                   | 696.4                             | -                            | 336                                      | 351   | 356   | 329   | 317   | 61    | 152   |
| TOTAL in Sp-L metagenome |                         | 100.0                           | 115.01            | -              | 132905                       | 88116              | 81603             | 684 (238)                                 | 40757                          | 16.3                   | 696.4                             | -                            | na                                       | na    | na    | na    | na    | na    | na    |

<sup>a</sup> Taxonomy used for bin-genome clustering. Clusters potentially assigned as plasmid were separated based on their coverage differences and less KO assignment.

<sup>b</sup> Relative frequency within the SP-L metagenome was calculated based on the coverage of 17 universal single-copied core genes.

<sup>c</sup> Numbers of ORFs have potential errors in metagenomic ORF calling because of incomplete assemblies.

<sup>d</sup> Number of ORFs assigned as c-type cytochrome by CXXCH domain search. Numbers of multi-heme c-type cytochromes are described in parentheses.

<sup>e</sup> Bold letters indicate well-clustered bin-genomes in terms of the parameters.

<sup>f</sup> Values were calculated from frequency of KO assignment to universal single-copied gene family lists (Supplementary Table S7 and S8).

<sup>g</sup> Raw reads for each condition were separately mapped to SP-L contigs by using similarity cut-off by 0.95 and length cut-off by 0.7.

<sup>h</sup> The genome completeness of L7ppro was improved to 99% if different ORF calling program of MetaGene annotater was applied.



Supplementary TableS6. Continued.

Number of ORF annotated to specific KO within bin-genomes<sup>a</sup> 0 1 2 3 >4

| KO     | Genesymbol         | Description                                                  | Average peptide length ± SD | House keeping (%) | Single copied (%) | Bin-genome <sup>b</sup> |        |        |        |       |       |        |       |       |       |       |       |        |        | Plasmid etc. |        |        |        |         |        |   |   |   |
|--------|--------------------|--------------------------------------------------------------|-----------------------------|-------------------|-------------------|-------------------------|--------|--------|--------|-------|-------|--------|-------|-------|-------|-------|-------|--------|--------|--------------|--------|--------|--------|---------|--------|---|---|---|
|        |                    |                                                              |                             |                   |                   | H1geoA                  | H1geoB | H1geoC | H1geoD | H2geo | H3lac | H4Acet | H5geo | H6clo | H7geo | H8spi | H9bac | H10eps | H11bac | H12unc       | H3lacP | H4Bact | H6cloP | H6cloP2 | H7geoP |   |   |   |
| K01868 | thrS               | threonyl-tRNA synthetase                                     | 634 ± 51                    | 99.1              | 93.4              | 1                       | 0      | 0      | 0      | 1     | 1     | 1      | 1     | 1     | 1     | 1     | 1     | 1      | 1      | 1            | 1      | 1      | 1      | 0       | 0      | 0 | 0 | 0 |
| K03110 | ftsY               | signal recognition particle-docking protein FtsY             | 392 ± 86                    | 97.1              | 99.9              | 1                       | 0      | 0      | 1      | 1     | 1     | 1      | 1     | 1     | 2     | 1     | 1     | 1      | 1      | 1            | 1      | 1      | 1      | 0       | 0      | 0 | 0 | 0 |
| K01870 | ileS               | isoleucyl-tRNA synthetase                                    | 983 ± 75                    | 98.2              | 97.3              | 1                       | 0      | 0      | 0      | 1     | 1     | 1      | 1     | 1     | 1     | 1     | 1     | 1      | 1      | 1            | 1      | 1      | 0      | 0       | 0      | 0 | 1 |   |
| K02601 | nusG               | transcription termination/antitermination factor NusG        | 193 ± 39                    | 97.6              | 97.5              | 1                       | 0      | 0      | 0      | 1     | 1     | 1      | 1     | 1     | 1     | 2     | 1     | 1      | 1      | 1            | 2      | 1      | 0      | 0       | 0      | 0 | 0 |   |
| K06942 | ychF               | GTP-binding protein YchF                                     | 367 ± 10                    | 99.1              | 99.6              | 1                       | 0      | 0      | 0      | 1     | 1     | 1      | 1     | 1     | 1     | 1     | 1     | 1      | 1      | 1            | 1      | 2      | 0      | 0       | 0      | 0 | 0 |   |
| K01887 | argS               | Arginyl-tRNA synthetase                                      | 571 ± 38                    | 97.4              | 95.4              | 1                       | 0      | 0      | 0      | 1     | 1     | 1      | 1     | 1     | 1     | 1     | 1     | 1      | 1      | 1            | 1      | 1      | 0      | 0       | 0      | 0 | 0 |   |
| K03702 | uvrB               | excinuclease ABC, B subunit                                  | 687 ± 65                    | 96.7              | 99.4              | 2                       | 0      | 0      | 2      | 1     | 1     | 1      | 1     | 1     | 1     | 1     | 1     | 1      | 1      | 1            | 1      | 1      | 0      | 0       | 0      | 0 | 0 |   |
| K01876 | aspS               | aspartyl-tRNA synthetase                                     | 584 ± 28                    | 98.5              | 98.8              | 1                       | 0      | 0      | 0      | 1     | 2     | 2      | 1     | 1     | 1     | 2     | 1     | 1      | 1      | 1            | 1      | 1      | 0      | 0       | 0      | 0 | 0 |   |
| K01892 | hisS               | histidyl-tRNA synthetase                                     | 434 ± 25                    | 98.4              | 96.8              | 1                       | 1      | 1      | 1      | 1     | 2     | 1      | 1     | 2     | 1     | 1     | 1     | 1      | 1      | 1            | 1      | 1      | 0      | 0       | 0      | 0 | 0 |   |
| K01883 | cysS               | cysteinyl-tRNA synthetase                                    | 473 ± 39                    | 97.3              | 97.3              | 0                       | 0      | 0      | 1      | 1     | 1     | 2      | 1     | 1     | 1     | 1     | 1     | 1      | 1      | 1            | 1      | 1      | 0      | 0       | 0      | 0 | 0 |   |
| K02343 | dnaX               | DNA polymerase III, subunits gamma and tau                   | 614 ± 141                   | 97.5              | 95.3              | 2                       | 0      | 0      | 1      | 1     | 1     | 1      | 1     | 1     | 1     | 2     | 1     | 1      | 1      | 1            | 2      | 0      | 0      | 0       | 0      | 0 | 0 |   |
| K01937 | pyrG <sup>d</sup>  | CTP synthase                                                 | 544 ± 15                    | 94.1              | 99.8              | 1                       | 0      | 0      | 1      | 1     | 1     | 1      | 1     | 1     | 1     | 1     | 1     | 1      | 1      | 1            | 1      | 1      | 0      | 0       | 0      | 0 | 0 |   |
| K00927 | pgk <sup>d</sup>   | phosphoglycerate kinase                                      | 399 ± 15                    | 94.5              | 98.4              | 1                       | 0      | 0      | 0      | 1     | 1     | 1      | 1     | 1     | 1     | 1     | 1     | 1      | 1      | 1            | 1      | 1      | 0      | 0       | 0      | 0 | 0 |   |
| K02834 | rfbA               | ribosome-binding factor A                                    | 133 ± 47                    | 97.0              | 99.9              | 1                       | 0      | 0      | 0      | 1     | 1     | 1      | 1     | 1     | 1     | 1     | 1     | 1      | 1      | 1            | 1      | 1      | 0      | 0       | 0      | 0 | 0 |   |
| K02838 | frt <sup>d</sup>   | ribosome recycling factor                                    | 185 ± 5                     | 98.6              | 99.9              | 1                       | 0      | 0      | 0      | 1     | 1     | 1      | 1     | 1     | 1     | 1     | 1     | 1      | 1      | 1            | 1      | 1      | 0      | 0       | 0      | 0 | 0 |   |
| K02357 | tsf <sup>d</sup>   | translation elongation factor Ts                             | 285 ± 36                    | 98.1              | 99.9              | 1                       | 0      | 0      | 0      | 1     | 1     | 1      | 1     | 1     | 1     | 1     | 1     | 1      | 1      | 1            | 1      | 1      | 0      | 0       | 0      | 0 | 0 |   |
| K02835 | prfA               | peptide chain release factor 1                               | 358 ± 12                    | 97.9              | 99.8              | 2                       | 0      | 0      | 1      | 2     | 1     | 1      | 1     | 1     | 3     | 1     | 1     | 1      | 1      | 1            | 1      | 0      | 0      | 0       | 0      | 0 | 0 |   |
| K03977 | engA               | ribosome-associated GTPase EngA                              | 467 ± 46                    | 97.3              | 99.8              | 1                       | 0      | 0      | 2      | 1     | 1     | 1      | 1     | 1     | 1     | 1     | 1     | 1      | 1      | 1            | 1      | 1      | 0      | 0       | 0      | 0 | 0 |   |
| K02519 | infB               | translation initiation factor IF-2                           | 865 ± 127                   | 98.5              | 99.6              | 1                       | 0      | 0      | 0      | 1     | 1     | 1      | 1     | 2     | 1     | 1     | 1     | 1      | 1      | 1            | 1      | 0      | 1      | 0       | 0      | 0 | 0 |   |
| K03664 | smpB <sup>d</sup>  | SmpB protein                                                 | 156 ± 10                    | 98.0              | 99.5              | 1                       | 0      | 0      | 0      | 1     | 1     | 1      | 1     | 1     | 1     | 1     | 1     | 1      | 1      | 1            | 1      | 1      | 0      | 0       | 0      | 0 | 0 |   |
| K03596 | lepA               | GTP-binding protein LepA                                     | 604 ± 22                    | 98.4              | 99.4              | 2                       | 0      | 2      | 0      | 1     | 1     | 1      | 1     | 1     | 1     | 1     | 1     | 1      | 1      | 1            | 1      | 1      | 0      | 0       | 0      | 0 | 0 |   |
| K03545 | tig                | trigger factor                                               | 445 ± 23                    | 97.9              | 99.4              | 1                       | 0      | 0      | 0      | 1     | 1     | 1      | 1     | 1     | 1     | 1     | 1     | 1      | 1      | 1            | 1      | 1      | 0      | 0       | 0      | 0 | 0 |   |
| K03438 | mraW               | MraW methylase family                                        | 318 ± 22                    | 98.5              | 99.3              | 2                       | 0      | 0      | 0      | 1     | 1     | 1      | 1     | 1     | 1     | 1     | 1     | 1      | 1      | 1            | 1      | 2      | 0      | 0       | 0      | 0 | 0 |   |
| K02520 | infC <sup>d</sup>  | translation initiation factor IF-3                           | 176 ± 39                    | 96.4              | 98.7              | 1                       | 0      | 0      | 0      | 1     | 1     | 1      | 1     | 1     | 1     | 1     | 1     | 1      | 1      | 1            | 1      | 1      | 0      | 0       | 0      | 0 | 0 |   |
| K03046 | rpoC               | DNA-directed RNA polymerase, beta' or beta'' subunit         | 1335 ± 148                  | 96.5              | 97.4              | 1                       | 0      | 0      | 0      | 1     | 1     | 1      | 1     | 1     | 1     | 1     | 1     | 1      | 1      | 1            | 1      | 1      | 0      | 0       | 0      | 0 | 0 |   |
| K02316 | dnaG <sup>d</sup>  | DNA primase                                                  | 606 ± 57                    | 97.8              | 98.2              | 1                       | 0      | 0      | 1      | 1     | 1     | 1      | 1     | 2     | 1     | 1     | 2     | 1      | 1      | 1            | 1      | 0      | 9      | 0       | 0      | 2 | 0 |   |
| K03553 | recA               | recA protein                                                 | 358 ± 61                    | 96.6              | 96.8              | 2                       | 0      | 0      | 1      | 1     | 1     | 1      | 1     | 1     | 1     | 1     | 1     | 1      | 1      | 1            | 1      | 1      | 0      | 0       | 0      | 0 | 0 |   |
| K02963 | rpsR               | ribosomal protein S18                                        | 83 ± 11                     | 98.2              | 96.8              | 1                       | 0      | 0      | 0      | 1     | 1     | 1      | 1     | 1     | 1     | 1     | 1     | 1      | 1      | 1            | 1      | 1      | 0      | 0       | 0      | 0 | 0 |   |
| K00942 | gmk                | guanylate kinase                                             | 207 ± 24                    | 95.7              | 96.6              | 1                       | 0      | 0      | 0      | 1     | 1     | 1      | 1     | 1     | 1     | 0     | 1     | 1      | 1      | 1            | 1      | 1      | 0      | 0       | 0      | 0 | 0 |   |
| K02338 | dnaN               | DNA polymerase III, beta subunit                             | 375 ± 16                    | 98.3              | 94.7              | 1                       | 0      | 0      | 0      | 1     | 1     | 1      | 1     | 1     | 1     | 1     | 1     | 1      | 1      | 1            | 1      | 1      | 0      | 0       | 0      | 0 | 1 |   |
| K02902 | rpmB               | ribosomal protein L28                                        | 75 ± 13                     | 96.1              | 94.4              | 1                       | 0      | 0      | 0      | 1     | 1     | 1      | 1     | 1     | 0     | 0     | 1     | 1      | 1      | 1            | 1      | 1      | 0      | 0       | 0      | 0 | 0 |   |
| K02313 | dnaA               | chromosomal replication initiator protein DnaA               | 469 ± 54                    | 96.6              | 94.1              | 2                       | 1      | 2      | 1      | 2     | 1     | 1      | 2     | 1     | 2     | 1     | 1     | 1      | 1      | 1            | 1      | 1      | 0      | 0       | 0      | 0 | 0 |   |
| K07042 | ybeY               | probable rRNA maturation factor                              | 164 ± 31                    | 93.8              | 99.9              | 1                       | 0      | 0      | 0      | 1     | 1     | 1      | 1     | 1     | 1     | 1     | 1     | 1      | 1      | 1            | 1      | 1      | 0      | 0       | 0      | 0 | 0 |   |
| K00859 | coaE               | dephospho-CoA kinase                                         | 212 ± 42                    | 94.9              | 99.7              | 1                       | 0      | 0      | 1      | 1     | 1     | 1      | 1     | 2     | 1     | 1     | 1     | 2      | 1      | 2            | 1      | 0      | 0      | 0       | 0      | 0 | 0 |   |
| K03595 | era                | GTP-binding protein Era                                      | 306 ± 19                    | 92.2              | 99.6              | 1                       | 0      | 0      | 0      | 1     | 1     | 1      | 1     | 1     | 1     | 1     | 1     | 1      | 1      | 1            | 1      | 2      | 0      | 0       | 0      | 0 | 0 |   |
| K03075 | secG <sup>f</sup>  | preprotein translocase, SecG subunit                         | 105 ± 30                    | 95.2              | 99.8              | 1                       | 0      | 0      | 0      | 1     | 1     | 1      | 1     | 1     | 0     | 1     | 1     | 1      | 1      | 1            | 1      | 0      | 0      | 0       | 0      | 0 | 0 |   |
| K03073 | secE <sup>f</sup>  | preprotein translocase, SecE subunit                         | 92 ± 32                     | 94.7              | 99.6              | 1                       | 0      | 0      | 0      | 1     | 1     | 1      | 1     | 1     | 0     | 1     | 1     | 1      | 1      | 1            | 0      | 0      | 0      | 0       | 0      | 0 | 0 |   |
| K04043 | dnaK <sup>f</sup>  | chaperone protein DnaK                                       | 629 ± 35                    | 97.9              | 91.6              | 1                       | 0      | 0      | 0      | 1     | 1     | 3      | 1     | 1     | 1     | 3     | 1     | 1      | 1      | 4            | 0      | 1      | 0      | 0       | 0      | 0 | 0 |   |
| K02470 | gyrB <sup>16</sup> | DNA gyrase, B subunit                                        | 724 ± 94                    | 97.6              | 88.5              | 1                       | 0      | 0      | 0      | 1     | 1     | 2      | 1     | 1     | 1     | 2     | 1     | 1      | 1      | 1            | 1      | 0      | 0      | 0       | 0      | 0 | 0 |   |
| K01972 | ligA <sup>f</sup>  | DNA ligase, NAD-dependent                                    | 675 ± 80                    | 96.9              | 88.3              | 1                       | 0      | 0      | 2      | 1     | 1     | 1      | 1     | 1     | 1     | 1     | 1     | 2      | 1      | 1            | 0      | 0      | 0      | 0       | 1      | 0 | 0 |   |
| K02469 | gyrA <sup>f</sup>  | DNA gyrase, A subunit                                        | 852 ± 82                    | 97.6              | 86.6              | 1                       | 0      | 0      | 0      | 1     | 1     | 2      | 1     | 1     | 1     | 2     | 1     | 1      | 1      | 1            | 1      | 0      | 0      | 0       | 0      | 0 | 0 |   |
| K03070 | secA <sup>f</sup>  | preprotein translocase, SecA subunit                         | 889 ± 79                    | 99.2              | 86.1              | 1                       | 1      | 1      | 3      | 1     | 1     | 1      | 2     | 1     | 1     | 1     | 1     | 2      | 1      | 1            | 0      | 0      | 0      | 0       | 0      | 0 | 0 |   |
| K02911 | rpmF <sup>f</sup>  | ribosomal protein L32                                        | 59 ± 7                      | 93.5              | 96.6              | 0                       | 0      | 0      | 0      | 0     | 1     | 1      | 0     | 0     | 0     | 0     | 0     | 1      | 0      | 0            | 0      | 0      | 0      | 0       | 0      | 0 | 0 |   |
| K00566 | mnmA <sup>f</sup>  | tRNA (5-methylaminomethyl-2-thiouridylate)-methyltransferase | 370 ± 25                    | 95.0              | 93.7              | 2                       | 1      | 2      | 3      | 2     | 1     | 1      | 3     | 1     | 2     | 1     | 2     | 2      | 1      | 1            | 0      | 0      | 0      | 0       | 0      | 0 | 0 |   |
| K02914 | rpmH <sup>f</sup>  | ribosomal protein L34                                        | 46 ± 4                      | 88.2              | 99.9              | 0                       | 0      | 0      | 0      | 0     | 0     | 0      | 0     | 0     | 0     | 0     | 1     | 1      | 0      | 1            | 0      | 0      | 0      | 0       | 0      | 0 | 0 |   |
| K01879 | glyS <sup>f</sup>  | glycyl-tRNA synthetase beta chain                            | 693 ± 32                    | 64.6              | 100.0             | 1                       | 0      | 0      | 0      | 1     | 1     | 0      | 1     | 1     | 0     | 0     | 1     | 0      | 1      | 0            | 1      | 0      | 0      | 0       | 0      | 0 | 0 |   |
| K01869 | leuS <sup>f</sup>  | leucyl-tRNA synthetase                                       | 859 ± 61                    | 47.4              | 26.6              | 0                       | 4      | 0      | 4      | 1     | 1     | 1      | 1     | 1     | 1     | 1     | 1     | 1      | 1      | 1            | 1      | 0      | 0      | 0       | 0      | 0 | 0 |   |

<sup>a</sup> Bacterial genomes having the housekeeping gene / Total 1943 KEGG organisms (in Nov, 2012) × 100 (%). Red colored, <95%; Orange colored, <97%.<sup>b</sup> Bacterial genomes having the housekeeping gene with single copy / Total bacterial genomes having the housekeeping gene × 100 (%). Red colored, <95%; Orange colored, <97%.<sup>c</sup> Seventeen single-copied housekeeping genes (seven for ribosomal proteins) used for core gene-based microbial community analysis.<sup>d</sup> Thirty protein encoding phylogenetic marker genes used for AMPHORA program (Wu et al. 2008). The column yellow-highlighted.<sup>e</sup> Three single-copied housekeeping genes (rpsG, tllS, and gyrB) used for phylogenetic tree analysis.<sup>f</sup> Twelve single-copied housekeeping genes were not used for draft genome completeness estimation because of their low qualities.<sup>g</sup> Column was colored depend on number of ORF annotated to specific KO within each bin-genome. White column was counted for draft genome completeness.<sup>h</sup> Column with red letter showed multi-copied partial ORFs annotated to same KO, and the sum of the peptide length was similar to averaged peptide length, which treated as single copy existence.







Supplementary TableS8. Continued.

Number of ORF annotated to specific KO within bin-genomes<sup>g</sup>

|   |   |   |   |    |
|---|---|---|---|----|
| 0 | 1 | 2 | 3 | >4 |
|---|---|---|---|----|

| KO     | Gene symbol       | Description                                                    | Average peptide length ± SD | House keeping (%) <sup>a</sup> | Single copied (%) <sup>b</sup> | Bin-genome <sup>h</sup> |       |       |       |       |       |        |       |       |         |        |        |        |        |        |        |        |        |        |        |        |        |        |        |         |   |   |   |   |
|--------|-------------------|----------------------------------------------------------------|-----------------------------|--------------------------------|--------------------------------|-------------------------|-------|-------|-------|-------|-------|--------|-------|-------|---------|--------|--------|--------|--------|--------|--------|--------|--------|--------|--------|--------|--------|--------|--------|---------|---|---|---|---|
|        |                   |                                                                |                             |                                |                                | L1geo                   | L2tol | L3tol | L4bac | L5met | L6fir | L7ppro | L8spi | L9bac | L10gmet | L11pro | L12bac | L13fir | L14bac | L15bac | L16bac | L17bac | L18ver | L19bac | L20tol | L21met | L22fir | L23elu | L24fir | L12bacP |   |   |   |   |
| K06942 | ychF              | GTP-binding protein YchF                                       | 367 ± 10                    | 99.1                           | 99.6                           | 1                       | 1     | 1     | 1     | 1     | 1     | 1      | 1     | 1     | 2       | 1      | 1      | 1      | 1      | 1      | 1      | 2      | 1      | 1      | 3      | 1      | 1      | 1      | 1      | 0       |   |   |   |   |
| K04075 | tilS <sup>e</sup> | tRNA(Ile)-lysidine synthetase                                  | 413 ± 61                    | 96.4                           | 99.8                           | 1                       | 1     | 1     | 1     | 0     | 1     | 1      | 1     | 1     | 1       | 1      | 1      | 1      | 1      | 1      | 1      | 1      | 1      | 2      | 1      | 0      | 1      | 1      | 1      | 0       |   |   |   |   |
| K01866 | tyrS              | tyrosyl-tRNA synthetase                                        | 412 ± 18                    | 99.5                           | 94.2                           | 1                       | 2     | 2     | 1     | 1     | 1     | 1      | 1     | 1     | 1       | 1      | 1      | 1      | 1      | 1      | 1      | 1      | 1      | 1      | 0      | 2      | 0      | 1      | 1      | 0       |   |   |   |   |
| K01876 | aspS              | aspartyl-tRNA synthetase                                       | 584 ± 28                    | 98.5                           | 98.8                           | 1                       | 1     | 1     | 1     | 1     | 1     | 1      | 2     | 1     | 1       | 1      | 1      | 1      | 1      | 2      | 1      | 1      | 1      | 0      | 0      | 1      | 1      | 1      | 1      | 0       |   |   |   |   |
| K01892 | hisS              | histidyl-tRNA synthetase                                       | 434 ± 25                    | 98.4                           | 96.8                           | 1                       | 1     | 1     | 1     | 2     | 1     | 1      | 1     | 1     | 1       | 1      | 2      | 1      | 1      | 1      | 1      | 1      | 1      | 0      | 3      | 2      | 1      | 2      | 1      | 0       |   |   |   |   |
| K01883 | cysS              | cysteiny-tRNA synthetase                                       | 473 ± 39                    | 97.3                           | 97.3                           | 1                       | 1     | 1     | 1     | 0     | 1     | 1      | 1     | 1     | 1       | 1      | 1      | 1      | 1      | 1      | 1      | 1      | 1      | 1      | 3      | 0      | 0      | 1      | 1      | 0       |   |   |   |   |
| K02343 | dnaX              | DNA polymerase III, subunits gamma and tau                     | 614 ± 141                   | 97.5                           | 95.3                           | 1                       | 1     | 1     | 1     | 0     | 2     | 1      | 2     | 1     | 1       | 2      | 1      | 1      | 1      | 1      | 1      | 1      | 1      | 2      | 1      | 1      | 1      | 0      | 1      | 2       | 0 |   |   |   |
| K01937 | pyrG <sup>d</sup> | CTP synthase                                                   | 544 ± 15                    | 94.1                           | 99.8                           | 1                       | 1     | 1     | 1     | 0     | 1     | 1      | 1     | 1     | 1       | 1      | 1      | 1      | 1      | 1      | 1      | 0      | 2      | 1      | 1      | 2      | 0      | 0      | 1      | 1       | 0 |   |   |   |
| K01870 | ileS              | isoleucyl-tRNA synthetase                                      | 983 ± 75                    | 98.2                           | 97.3                           | 1                       | 1     | 1     | 1     | 4     | 1     | 1      | 1     | 1     | 1       | 1      | 1      | 2      | 1      | 1      | 1      | 1      | 1      | 1      | 1      | 1      | 1      | 1      | 1      | 1       | 0 |   |   |   |
| K02834 | rfaA              | ribosome-binding factor A                                      | 133 ± 47                    | 97.0                           | 99.9                           | 1                       | 1     | 1     | 1     | 0     | 1     | 1      | 1     | 1     | 1       | 1      | 1      | 1      | 1      | 1      | 1      | 1      | 1      | 1      | 0      | 0      | 0      | 1      | 1      | 1       | 0 |   |   |   |
| K02838 | frr <sup>d</sup>  | ribosome recycling factor                                      | 185 ± 5                     | 98.6                           | 99.9                           | 1                       | 1     | 1     | 1     | 0     | 1     | 1      | 1     | 1     | 1       | 1      | 1      | 1      | 1      | 1      | 1      | 1      | 1      | 1      | 1      | 0      | 0      | 0      | 1      | 0       | 1 | 0 |   |   |
| K02357 | tsf <sup>d</sup>  | translation elongation factor Ts                               | 285 ± 36                    | 98.1                           | 99.9                           | 1                       | 1     | 1     | 1     | 0     | 1     | 1      | 1     | 1     | 1       | 1      | 1      | 1      | 1      | 1      | 1      | 1      | 1      | 1      | 2      | 1      | 0      | 0      | 0      | 3       | 1 | 0 |   |   |
| K02835 | prfA              | peptide chain release factor 1                                 | 358 ± 12                    | 97.9                           | 99.8                           | 1                       | 1     | 1     | 1     | 0     | 1     | 1      | 1     | 1     | 1       | 2      | 1      | 1      | 1      | 1      | 1      | 1      | 0      | 1      | 1      | 2      | 0      | 0      | 0      | 1       | 1 | 0 |   |   |
| K03977 | engA              | ribosome-associated GTPase EngA                                | 467 ± 46                    | 97.3                           | 99.8                           | 1                       | 1     | 1     | 1     | 0     | 1     | 1      | 1     | 1     | 1       | 1      | 1      | 1      | 1      | 1      | 1      | 1      | 0      | 1      | 1      | 0      | 1      | 2      | 0      | 1       | 0 | 1 | 0 |   |
| K02519 | infB              | translation initiation factor IF-2                             | 865 ± 127                   | 98.5                           | 99.6                           | 1                       | 1     | 1     | 1     | 1     | 1     | 1      | 1     | 1     | 1       | 1      | 1      | 1      | 1      | 1      | 1      | 1      | 2      | 2      | 1      | 1      | 0      | 0      | 0      | 2       | 1 | 1 | 0 |   |
| K03664 | smpB <sup>d</sup> | SmpB protein                                                   | 156 ± 10                    | 98.0                           | 99.5                           | 2                       | 1     | 1     | 1     | 0     | 1     | 1      | 1     | 1     | 1       | 1      | 1      | 1      | 1      | 1      | 1      | 1      | 0      | 1      | 1      | 1      | 1      | 0      | 0      | 1       | 1 | 1 | 0 |   |
| K03596 | lepA              | GTP-binding protein LepA                                       | 604 ± 22                    | 98.4                           | 99.4                           | 1                       | 1     | 1     | 1     | 0     | 1     | 1      | 1     | 1     | 1       | 1      | 1      | 2      | 1      | 1      | 1      | 1      | 1      | 2      | 1      | 3      | 3      | 1      | 0      | 1       | 1 | 1 | 0 |   |
| K03545 | tig               | trigger factor                                                 | 445 ± 23                    | 97.9                           | 99.4                           | 1                       | 1     | 1     | 1     | 0     | 1     | 1      | 1     | 1     | 1       | 1      | 1      | 1      | 1      | 1      | 1      | 1      | 1      | 1      | 1      | 0      | 0      | 0      | 1      | 0       | 1 | 0 | 1 | 0 |
| K03438 | mraW              | MraW methylase family                                          | 318 ± 22                    | 98.5                           | 99.3                           | 1                       | 1     | 1     | 1     | 0     | 1     | 1      | 1     | 1     | 1       | 2      | 1      | 2      | 1      | 1      | 1      | 1      | 2      | 2      | 1      | 1      | 1      | 0      | 0      | 0       | 1 | 1 | 1 | 0 |
| K02520 | infC <sup>d</sup> | translation initiation factor IF-3                             | 176 ± 39                    | 96.4                           | 98.7                           | 1                       | 1     | 1     | 1     | 0     | 1     | 1      | 1     | 1     | 1       | 1      | 1      | 1      | 1      | 1      | 1      | 1      | 1      | 3      | 1      | 0      | 0      | 0      | 0      | 1       | 1 | 1 | 0 |   |
| K03043 | rpoB <sup>d</sup> | DNA-directed RNA polymerase, beta subunit                      | 1274 ± 108                  | 95.5                           | 99.5                           | 1                       | 2     | 1     | 1     | 1     | 1     | 1      | 1     | 2     | 1       | 1      | 1      | 1      | 1      | 1      | 1      | 2      | 1      | 1      | 1      | 2      | 2      | 0      | 0      | 3       | 1 | 3 | 0 |   |
| K02316 | dnaG <sup>d</sup> | DNA primase                                                    | 606 ± 57                    | 97.8                           | 98.2                           | 1                       | 1     | 1     | 3     | 1     | 1     | 1      | 1     | 1     | 1       | 1      | 1      | 1      | 1      | 2      | 2      | 1      | 1      | 1      | 2      | 5      | 0      | 1      | 1      | 1       | 1 | 1 | 0 |   |
| K03553 | recA              | recA protein                                                   | 358 ± 61                    | 96.6                           | 96.8                           | 1                       | 1     | 1     | 1     | 0     | 1     | 1      | 1     | 1     | 1       | 2      | 1      | 1      | 1      | 1      | 1      | 1      | 1      | 1      | 3      | 3      | 3      | 0      | 1      | 1       | 1 | 1 | 0 |   |
| K02963 | rpsR              | ribosomal protein S18                                          | 83 ± 11                     | 98.2                           | 96.8                           | 1                       | 1     | 1     | 1     | 0     | 1     | 1      | 1     | 1     | 1       | 1      | 1      | 1      | 1      | 1      | 1      | 1      | 1      | 1      | 1      | 0      | 0      | 0      | 1      | 1       | 1 | 1 | 0 |   |
| K00942 | gmk               | guanylate kinase                                               | 207 ± 24                    | 95.7                           | 96.6                           | 1                       | 1     | 1     | 1     | 0     | 2     | 1      | 0     | 1     | 1       | 1      | 1      | 1      | 1      | 1      | 1      | 1      | 1      | 1      | 1      | 0      | 0      | 0      | 1      | 1       | 1 | 1 | 0 |   |
| K02338 | dnaN              | DNA polymerase III, beta subunit                               | 375 ± 16                    | 98.3                           | 94.7                           | 1                       | 1     | 1     | 1     | 0     | 1     | 1      | 1     | 1     | 1       | 1      | 1      | 1      | 1      | 1      | 2      | 1      | 1      | 1      | 1      | 2      | 0      | 0      | 0      | 1       | 1 | 1 | 0 |   |
| K02902 | rpmB              | ribosomal protein L28                                          | 75 ± 13                     | 96.1                           | 94.4                           | 0                       | 1     | 0     | 1     | 0     | 0     | 1      | 1     | 1     | 1       | 1      | 0      | 1      | 1      | 1      | 1      | 1      | 1      | 1      | 1      | 0      | 0      | 0      | 0      | 0       | 0 | 0 | 1 | 0 |
| K02313 | dnaA              | chromosomal replication initiator protein DnaA                 | 469 ± 54                    | 96.6                           | 94.1                           | 2                       | 1     | 1     | 1     | 0     | 1     | 2      | 1     | 1     | 1       | 2      | 1      | 1      | 1      | 1      | 1      | 1      | 1      | 1      | 1      | 1      | 0      | 0      | 0      | 1       | 2 | 1 | 0 |   |
| K07042 | ybeY              | probable rRNA maturation factor                                | 164 ± 31                    | 93.8                           | 99.9                           | 1                       | 1     | 1     | 0     | 0     | 1     | 1      | 1     | 1     | 1       | 1      | 1      | 1      | 1      | 1      | 1      | 1      | 1      | 2      | 1      | 0      | 0      | 0      | 1      | 1       | 1 | 1 | 0 |   |
| K00859 | coaE              | dephospho-CoA kinase                                           | 212 ± 42                    | 94.9                           | 99.7                           | 2                       | 1     | 1     | 1     | 1     | 0     | 1      | 1     | 1     | 1       | 0      | 1      | 1      | 1      | 1      | 1      | 2      | 1      | 1      | 1      | 2      | 1      | 0      | 1      | 1       | 1 | 1 | 1 | 0 |
| K03595 | era               | GTP-binding protein Era                                        | 306 ± 19                    | 92.2                           | 99.6                           | 1                       | 1     | 1     | 1     | 0     | 1     | 1      | 1     | 1     | 1       | 1      | 1      | 1      | 1      | 1      | 1      | 0      | 1      | 0      | 1      | 2      | 0      | 0      | 0      | 1       | 1 | 1 | 1 | 0 |
| K03075 | secG <sup>f</sup> | preprotein translocase, SecG subunit                           | 105 ± 30                    | 95.2                           | 99.8                           | 0                       | 1     | 1     | 1     | 0     | 0     | 1      | 1     | 1     | 1       | 0      | 0      | 1      | 1      | 1      | 1      | 1      | 1      | 1      | 0      | 1      | 0      | 0      | 0      | 0       | 0 | 1 | 0 | 0 |
| K03073 | secE <sup>f</sup> | preprotein translocase, SecE subunit                           | 92 ± 32                     | 94.7                           | 99.6                           | 0                       | 1     | 0     | 1     | 0     | 0     | 0      | 1     | 1     | 1       | 0      | 1      | 1      | 0      | 1      | 1      | 0      | 1      | 0      | 0      | 0      | 0      | 0      | 0      | 1       | 0 | 0 | 0 | 0 |
| K04043 | dnaK <sup>f</sup> | chaperone protein DnaK                                         | 629 ± 35                    | 97.9                           | 91.6                           | 1                       | 1     | 1     | 1     | 1     | 1     | 1      | 3     | 1     | 1       | 2      | 1      | 1      | 1      | 1      | 1      | 1      | 0      | 4      | 1      | 0      | 0      | 0      | 1      | 1       | 2 | 0 | 0 |   |
| K02470 | gyrB <sup>g</sup> | DNA gyrase, B subunit                                          | 724 ± 94                    | 97.6                           | 88.5                           | 1                       | 1     | 1     | 1     | 1     | 2     | 1      | 2     | 1     | 1       | 1      | 1      | 1      | 1      | 1      | 1      | 1      | 2      | 3      | 4      | 3      | 1      | 0      | 1      | 1       | 2 | 0 | 0 |   |
| K01972 | ligA <sup>f</sup> | DNA ligase, NAD-dependent                                      | 675 ± 80                    | 96.9                           | 88.3                           | 1                       | 1     | 1     | 1     | 0     | 1     | 1      | 1     | 1     | 1       | 1      | 1      | 1      | 1      | 1      | 1      | 1      | 2      | 1      | 1      | 1      | 3      | 3      | 0      | 1       | 1 | 1 | 0 |   |
| K02469 | gyrA <sup>f</sup> | DNA gyrase, A subunit                                          | 852 ± 82                    | 97.6                           | 86.6                           | 1                       | 1     | 1     | 1     | 3     | 2     | 1      | 2     | 1     | 1       | 1      | 1      | 1      | 1      | 1      | 1      | 1      | 1      | 2      | 1      | 1      | 0      | 0      | 1      | 1       | 2 | 0 | 0 |   |
| K03070 | secA <sup>f</sup> | preprotein translocase, SecA subunit                           | 889 ± 79                    | 99.2                           | 86.1                           | 2                       | 1     | 1     | 1     | 0     | 1     | 1      | 1     | 1     | 1       | 1      | 1      | 1      | 1      | 1      | 1      | 1      | 1      | 2      | 3      | 2      | 2      | 0      | 0      | 1       | 1 | 2 | 0 |   |
| K02911 | rpmF <sup>f</sup> | ribosomal protein L32                                          | 59 ± 7                      | 93.5                           | 96.6                           | 0                       | 0     | 1     | 1     | 0     | 1     | 0      | 0     | 0     | 0       | 0      | 1      | 0      | 1      | 1      | 0      | 1      | 0      | 0      | 0      | 0      | 0      | 0      | 1      | 1       | 1 | 0 | 0 |   |
| K00566 | mnmA <sup>f</sup> | tRNA (5-methylaminomethyl-2-thiouridylylate)-methyltransferase | 370 ± 25                    | 95.0                           | 93.7                           | 2                       | 1     | 1     | 1     | 0     | 1     | 2      | 1     | 1     | 2       | 1      | 1      | 2      | 2      | 1      | 1      | 2      | 0      | 0      | 0      | 0      | 0      | 0      | 0      | 2       | 1 | 1 | 0 | 0 |
| K02914 | rpmH <sup>f</sup> | ribosomal protein L34                                          | 46 ± 4                      | 88.2                           | 99.9                           | 0                       | 0     | 0     | 0     | 0     | 0     | 0      | 0     | 0     | 0       | 1      | 0      | 0      | 0      | 1      | 0      | 1      | 0      | 0      | 0      | 0      | 0      | 0      | 0      | 0       | 0 | 0 | 1 | 0 |
| K01879 | glyS <sup>f</sup> | glycyl-tRNA synthetase beta chain                              | 693 ± 32                    | 64.6                           | 100.0                          | 1                       | 1     | 1     | 0     | 0     | 0     | 0      | 1     | 0     | 0       | 1      | 1      | 1      | 0      | 0      | 0      | 0      | 0      | 0      | 0      | 0      | 2      | 0      | 0      | 1       | 1 | 0 | 0 |   |
| K01869 | leuS <sup>f</sup> | leucyl-tRNA synthetase                                         | 859 ± 61                    | 47.4                           | 26.6                           | 1                       | 1     | 1     | 1     | 1     | 1     | 1      | 1     | 1     | 2       | 1      | 1      | 1      | 1      | 1      | 1      | 1      | 1      | 2      | 1      | 1      | 0      | 0      | 1      | 1       | 1 | 1 | 0 |   |

<sup>a</sup> Bacterial genomes having the housekeeping gene / Total 1943 KEGG organisms (in Nov, 2012) × 100 (%). Red colored, <95%; Orange colored, <97%.<sup>b</sup> Bacterial genomes having the housekeeping gene with single copy / Total bacterial genomes having the housekeeping gene × 100 (%). Red colored, <95%; Orange colored, <97%.<sup>c</sup> Seventeen single-copied housekeeping genes (seven for ribosomal proteins) used for core gene-based microbial community analysis.<sup>d</sup> Thirty protein encoding phylogenetic marker genes used for AMPHORA program (Wu et al. 2008). The column yellow-highlighted.<sup>e</sup> Three single-copied housekeeping genes (rpsG, tilS, and gyrB) used for phylogenetic tree analysis.<sup>f</sup> Twelve single-copied housekeeping genes were not used for draft genome completeness estimation because of their low qualities.<sup>g</sup> Column was colored depend on number of ORF annotated to specific KO within each bin-genome. White column was counted for draft genome completeness.<sup>h</sup> Column with red letter showed multi-copied partial ORFs annotated to same KO, and the sum of the peptide length was similar to averaged peptide length, which treated as single copy existence.

Supplementary Table S9. Single copied gene list for validation of draft genome assembly within domain *Archaea*<sup>a</sup>

| KO     | KO discription                                                     | Bin-genome<br>L5met | Bin-genome<br>L21met | <i>Methanosalsum<br/>zhilinae</i> | <i>Methanococcoides<br/>burtonii</i> |
|--------|--------------------------------------------------------------------|---------------------|----------------------|-----------------------------------|--------------------------------------|
| K00096 | glycerol-1-phosphate dehydrogenase [NAD(P)] [EC:1.1.1.261]         | 1                   | 2                    | 1                                 | 1                                    |
| K00555 | tRNA (guanine-N2-)-methyltransferase [EC:2.1.1.32]                 | 1                   | 0                    | 1                                 | 1                                    |
| K00586 | diphthine synthase [EC:2.1.1.98]                                   | 3                   | 1                    | 1                                 | 1                                    |
| K00609 | aspartate carbamoyltransferase catalytic subunit [EC:2.1.3.2]      | 1                   | 0                    | 1                                 | 1                                    |
| K00611 | ornithine carbamoyltransferase [EC:2.1.3.3]                        | 1                   | 0                    | 1                                 | 1                                    |
| K00946 | thiamine-monophosphate kinase [EC:2.7.4.16]                        | 1                   | 0                    | 1                                 | 1                                    |
| K01251 | adenosylhomocysteinase [EC:3.3.1.1]                                | 2                   | 2                    | 1                                 | 1                                    |
| K01265 | methionyl aminopeptidase [EC:3.4.11.18]                            | 1                   | 0                    | 1                                 | 1                                    |
| K01591 | orotidine-5'-phosphate decarboxylase [EC:4.1.1.23]                 | 1                   | 1                    | 1                                 | 1                                    |
| K01803 | triosephosphate isomerase (TIM) [EC:5.3.1.1]                       | 1                   | 2                    | 1                                 | 1                                    |
| K01807 | ribose 5-phosphate isomerase A [EC:5.3.1.6]                        | 1                   | 1                    | 1                                 | 1                                    |
| K01868 | threonyl-tRNA synthetase [EC:6.1.1.3]                              | 1                   | 2                    | 1                                 | 1                                    |
| K01870 | isoleucyl-tRNA synthetase [EC:6.1.1.5]                             | 4                   | 1                    | 1                                 | 1                                    |
| K01872 | alanyl-tRNA synthetase [EC:6.1.1.7]                                | 2                   | 2                    | 1                                 | 1                                    |
| K01873 | valyl-tRNA synthetase [EC:6.1.1.9]                                 | 1                   | 2                    | 1                                 | 1                                    |
| K01874 | methionyl-tRNA synthetase [EC:6.1.1.10]                            | 2                   | 1                    | 1                                 | 1                                    |
| K01876 | aspartyl-tRNA synthetase [EC:6.1.1.12]                             | 1                   | 1                    | 1                                 | 1                                    |
| K01880 | glycyl-tRNA synthetase [EC:6.1.1.14]                               | 2                   | 1                    | 1                                 | 1                                    |
| K01881 | prolyl-tRNA synthetase [EC:6.1.1.15]                               | 1                   | 0                    | 1                                 | 1                                    |
| K01885 | glutamyl-tRNA synthetase [EC:6.1.1.17]                             | 1                   | 0                    | 1                                 | 1                                    |
| K01887 | arginyl-tRNA synthetase [EC:6.1.1.19]                              | 1                   | 2                    | 1                                 | 1                                    |
| K01889 | phenylalanyl-tRNA synthetase alpha chain [EC:6.1.1.20]             | 2                   | 1                    | 1                                 | 1                                    |
| K01890 | phenylalanyl-tRNA synthetase beta chain [EC:6.1.1.20]              | 2                   | 2                    | 1                                 | 1                                    |
| K01892 | histidyl-tRNA synthetase [EC:6.1.1.21]                             | 2                   | 1                    | 1                                 | 1                                    |
| K01937 | CTP synthase [EC:6.3.4.2]                                          | 1                   | 0                    | 1                                 | 1                                    |
| K01975 | 2'-5' RNA ligase [EC:6.5.1.-]                                      | 1                   | 1                    | 1                                 | 1                                    |
| K02117 | V-type H <sup>+</sup> -transporting ATPase subunit A [EC:3.6.3.14] | 1                   | 0                    | 1                                 | 1                                    |
| K02118 | V-type H <sup>+</sup> -transporting ATPase subunit B [EC:3.6.3.14] | 1                   | 0                    | 1                                 | 1                                    |
| K02528 | 16S rRNA -dimethyltransferase [EC:2.1.1.182]                       | 1                   | 1                    | 1                                 | 1                                    |
| K02601 | transcriptional antiterminator NusG                                | 1                   | 0                    | 1                                 | 1                                    |
| K02683 | DNA primase [EC:2.7.7.-]                                           | 1                   | 1                    | 1                                 | 1                                    |
| K02863 | large subunit ribosomal protein L1                                 | 1                   | 0                    | 1                                 | 1                                    |
| K02864 | large subunit ribosomal protein L10                                | 1                   | 0                    | 1                                 | 1                                    |
| K02866 | large subunit ribosomal protein L10e                               | 1                   | 1                    | 1                                 | 1                                    |
| K02867 | large subunit ribosomal protein L11                                | 1                   | 0                    | 1                                 | 1                                    |
| K02869 | large subunit ribosomal protein L12                                | 1                   | 0                    | 1                                 | 1                                    |
| K02871 | large subunit ribosomal protein L13                                | 1                   | 0                    | 1                                 | 1                                    |
| K02874 | large subunit ribosomal protein L14                                | 1                   | 0                    | 1                                 | 1                                    |
| K02876 | large subunit ribosomal protein L15                                | 1                   | 0                    | 1                                 | 1                                    |
| K02877 | large subunit ribosomal protein L15e                               | 1                   | 0                    | 1                                 | 1                                    |
| K02881 | large subunit ribosomal protein L18                                | 1                   | 0                    | 1                                 | 1                                    |
| K02883 | large subunit ribosomal protein L18e                               | 1                   | 0                    | 1                                 | 1                                    |
| K02885 | large subunit ribosomal protein L19e                               | 1                   | 0                    | 1                                 | 1                                    |
| K02886 | large subunit ribosomal protein L2                                 | 1                   | 0                    | 1                                 | 1                                    |
| K02889 | large subunit ribosomal protein L21e                               | 1                   | 1                    | 1                                 | 1                                    |
| K02890 | large subunit ribosomal protein L22                                | 1                   | 0                    | 1                                 | 1                                    |
| K02895 | large subunit ribosomal protein L24                                | 1                   | 0                    | 1                                 | 1                                    |
| K02896 | large subunit ribosomal protein L24e                               | 1                   | 0                    | 1                                 | 1                                    |
| K02906 | large subunit ribosomal protein L3                                 | 1                   | 0                    | 1                                 | 1                                    |
| K02907 | large subunit ribosomal protein L30                                | 1                   | 0                    | 1                                 | 1                                    |
| K02910 | large subunit ribosomal protein L31e                               | 1                   | 0                    | 1                                 | 1                                    |
| K02912 | large subunit ribosomal protein L32e                               | 1                   | 0                    | 1                                 | 1                                    |
| K02921 | large subunit ribosomal protein L37Ae                              | 1                   | 0                    | 1                                 | 1                                    |
| K02927 | large subunit ribosomal protein L40e                               | 0                   | 0                    | 1                                 | 1                                    |
| K02929 | large subunit ribosomal protein L44e                               | 1                   | 0                    | 1                                 | 1                                    |
| K02930 | large subunit ribosomal protein L4e                                | 1                   | 0                    | 1                                 | 1                                    |
| K02931 | large subunit ribosomal protein L5                                 | 1                   | 0                    | 1                                 | 1                                    |
| K02933 | large subunit ribosomal protein L6                                 | 1                   | 0                    | 1                                 | 1                                    |
| K02936 | large subunit ribosomal protein L7Ae                               | 1                   | 0                    | 1                                 | 1                                    |
| K02946 | small subunit ribosomal protein S10                                | 1                   | 0                    | 1                                 | 1                                    |
| K02948 | small subunit ribosomal protein S11                                | 1                   | 0                    | 1                                 | 1                                    |
| K02950 | small subunit ribosomal protein S12                                | 1                   | 0                    | 1                                 | 1                                    |
| K02952 | small subunit ribosomal protein S13                                | 1                   | 0                    | 0                                 | 1                                    |
| K02956 | small subunit ribosomal protein S15                                | 1                   | 0                    | 1                                 | 1                                    |
| K02961 | small subunit ribosomal protein S17                                | 1                   | 0                    | 1                                 | 1                                    |
| K02965 | small subunit ribosomal protein S19                                | 1                   | 0                    | 1                                 | 1                                    |
| K02966 | small subunit ribosomal protein S19e                               | 1                   | 0                    | 1                                 | 1                                    |
| K02967 | small subunit ribosomal protein S2                                 | 1                   | 0                    | 1                                 | 1                                    |
| K02974 | small subunit ribosomal protein S24e                               | 1                   | 1                    | 1                                 | 1                                    |
| K02978 | small subunit ribosomal protein S27e                               | 1                   | 0                    | 1                                 | 1                                    |

Supplementary Table S9. *Continued.*

| KO     | KO description                                                | Bin-genome<br>L5met | Bin-genome<br>L21met | <i>Methanosalsum<br/>zhilinae</i> | <i>Methanococcoides<br/>burtonii</i> |
|--------|---------------------------------------------------------------|---------------------|----------------------|-----------------------------------|--------------------------------------|
| K02979 | small subunit ribosomal protein S28e                          | 1                   | 0                    | 1                                 | 1                                    |
| K02982 | small subunit ribosomal protein S3                            | 1                   | 0                    | 1                                 | 1                                    |
| K02984 | small subunit ribosomal protein S3Ae                          | 1                   | 1                    | 1                                 | 1                                    |
| K02986 | small subunit ribosomal protein S4                            | 1                   | 0                    | 1                                 | 1                                    |
| K02987 | small subunit ribosomal protein S4e                           | 1                   | 0                    | 1                                 | 1                                    |
| K02988 | small subunit ribosomal protein S5                            | 1                   | 0                    | 1                                 | 1                                    |
| K02991 | small subunit ribosomal protein S6e                           | 1                   | 1                    | 1                                 | 1                                    |
| K02992 | small subunit ribosomal protein S7                            | 1                   | 0                    | 1                                 | 1                                    |
| K02994 | small subunit ribosomal protein S8                            | 1                   | 0                    | 1                                 | 1                                    |
| K02995 | small subunit ribosomal protein S8e                           | 1                   | 0                    | 1                                 | 1                                    |
| K02996 | small subunit ribosomal protein S9                            | 1                   | 0                    | 1                                 | 1                                    |
| K03041 | DNA-directed RNA polymerase subunit A' [EC:2.7.7.6]           | 1                   | 0                    | 1                                 | 1                                    |
| K03042 | DNA-directed RNA polymerase subunit A" [EC:2.7.7.6]           | 1                   | 0                    | 1                                 | 1                                    |
| K03047 | DNA-directed RNA polymerase subunit D [EC:2.7.7.6]            | 1                   | 0                    | 1                                 | 1                                    |
| K03049 | DNA-directed RNA polymerase subunit E' [EC:2.7.7.6]           | 1                   | 1                    | 1                                 | 1                                    |
| K03050 | DNA-directed RNA polymerase subunit E" [EC:2.7.7.6]           | 1                   | 1                    | 1                                 | 1                                    |
| K03053 | DNA-directed RNA polymerase subunit H [EC:2.7.7.6]            | 0                   | 0                    | 1                                 | 1                                    |
| K03055 | DNA-directed RNA polymerase subunit K [EC:2.7.7.6]            | 1                   | 0                    | 1                                 | 1                                    |
| K03056 | DNA-directed RNA polymerase subunit L [EC:2.7.7.6]            | 1                   | 0                    | 1                                 | 1                                    |
| K03058 | DNA-directed RNA polymerase subunit N [EC:2.7.7.6]            | 0                   | 0                    | 1                                 | 1                                    |
| K03076 | preprotein translocase subunit SecY                           | 2                   | 0                    | 1                                 | 1                                    |
| K03106 | signal recognition particle subunit SRP54                     | 1                   | 0                    | 1                                 | 1                                    |
| K03110 | fused signal recognition particle receptor                    | 1                   | 1                    | 1                                 | 1                                    |
| K03232 | elongation factor 1-beta                                      | 1                   | 1                    | 1                                 | 0                                    |
| K03234 | elongation factor 2                                           | 1                   | 0                    | 1                                 | 1                                    |
| K03237 | translation initiation factor 2 subunit 1                     | 1                   | 1                    | 1                                 | 1                                    |
| K03242 | translation initiation factor 2 subunit 3                     | 1                   | 1                    | 1                                 | 1                                    |
| K03243 | translation initiation factor 5B                              | 1                   | 0                    | 1                                 | 1                                    |
| K03263 | translation initiation factor 5A                              | 1                   | 2                    | 1                                 | 1                                    |
| K03264 | translation initiation factor 6                               | 1                   | 0                    | 1                                 | 1                                    |
| K03265 | peptide chain release factor subunit 1                        | 1                   | 1                    | 1                                 | 1                                    |
| K03330 | glutamyl-tRNA(Gln) amidotransferase subunit E [EC:6.3.5.7]    | 1                   | 2                    | 1                                 | 1                                    |
| K03470 | ribonuclease HII [EC:3.1.26.4]                                | 2                   | 2                    | 1                                 | 1                                    |
| K03626 | nascent polypeptide-associated complex subunit alpha          | 1                   | 0                    | 1                                 | 1                                    |
| K03627 | putative transcription factor                                 | 1                   | 1                    | 1                                 | 1                                    |
| K04483 | DNA repair protein RadA                                       | 1                   | 1                    | 1                                 | 1                                    |
| K04794 | peptidyl-tRNA hydrolase, PTH2 family [EC:3.1.1.29]            | 1                   | 0                    | 1                                 | 1                                    |
| K04795 | fibrillar-like pre-rRNA processing protein                    | 2                   | 1                    | 1                                 | 1                                    |
| K04798 | prefoldin beta subunit                                        | 1                   | 1                    | 1                                 | 1                                    |
| K04799 | flap endonuclease-1 [EC:3.-.-.]                               | 1                   | 1                    | 1                                 | 1                                    |
| K04800 | replication factor C large subunit                            | 1                   | 0                    | 1                                 | 1                                    |
| K06174 | ATP-binding cassette, sub-family E, member 1                  | 3                   | 2                    | 1                                 | 1                                    |
| K06865 | ATPase                                                        | 2                   | 1                    | 1                                 | 1                                    |
| K06875 | programmed cell death protein 5                               | 1                   | 0                    | 1                                 | 1                                    |
| K06943 | nucleolar GTP-binding protein                                 | 1                   | 1                    | 1                                 | 1                                    |
| K06944 | Predicted GTPase                                              | 1                   | 1                    | 1                                 | 1                                    |
| K06961 | ribosomal RNA assembly protein                                | 1                   | 0                    | 1                                 | 1                                    |
| K06965 | protein pelota                                                | 1                   | 0                    | 1                                 | 1                                    |
| K07041 | Predicted metal-dependent RNase                               | 1                   | 1                    | 1                                 | 1                                    |
| K07060 | UPF0271 protein                                               | 1                   | 1                    | 1                                 | 1                                    |
| K07178 | RIO kinase 1 [EC:2.7.11.1]                                    | 1                   | 0                    | 1                                 | 1                                    |
| K07558 | tRNA nucleotidyltransferase (CCA-adding enzyme) [EC:2.7.7.72] | 1                   | 1                    | 1                                 | 1                                    |
| K07561 | diphthamide synthase subunit DPH2                             | 1                   | 1                    | 1                                 | 1                                    |
| K07566 | tRNA threonylcarbamoyladenine biosynthesis protein            | 2                   | 1                    | 1                                 | 1                                    |
| K07572 | putative nucleotide binding protein                           | 1                   | 1                    | 1                                 | 1                                    |
| K07575 | PUA domain protein                                            | 1                   | 2                    | 0                                 | 1                                    |
| K07580 | hypothetical protein                                          | 0                   | 0                    | 1                                 | 1                                    |
| K07583 | tRNA pseudouridine synthase 10 [EC:5.4.99.-]                  | 1                   | 1                    | 1                                 | 1                                    |
| K07732 | riboflavin kinase, archaea type [EC:2.7.1.161]                | 1                   | 1                    | 1                                 | 1                                    |
| K09141 | hypothetical protein                                          | 1                   | 0                    | 1                                 | 1                                    |
| K09482 | glutamyl-tRNA(Gln) amidotransferase subunit D [EC:6.3.5.7]    | 1                   | 1                    | 1                                 | 1                                    |
| K09735 | hypothetical protein                                          | 1                   | 1                    | 1                                 | 1                                    |
| K09903 | uridylylase [EC:2.7.4.22]                                     | 1                   | 1                    | 1                                 | 1                                    |
| K11130 | H/ACA ribonucleoprotein complex subunit 3                     | 0                   | 0                    | 1                                 | 1                                    |
| K14415 | tRNA-splicing ligase RtcB [EC:6.5.1.3]                        | 1                   | 1                    | 1                                 | 1                                    |
| K14574 | ribosome maturation protein SDO1                              | 1                   | 0                    | 1                                 | 1                                    |

<sup>a</sup> Column was colored depend on number of ORF annotated to specific KO within each bin-genome. White column was counted for draft genome completeness. Column with red letter showed multi-copied partial ORFs annotated to same KO, and the sum of the peptide length was similar to averaged peptide length, which treated as single copy existence.

Supplementary Table S10. Minimum Information about a Metagenome-Assembled Genome (MIMAG)

| Bin Name | Genome classification | Completeness <sup>a</sup> | Contamination <sup>a</sup> | No. of tRNAs | 5S | 16S | 23S | Marker Lineage <sup>a</sup> | No. Markers <sup>a</sup> | 0 <sup>a</sup> | 1 <sup>a</sup> | 2 <sup>a</sup> | 3+ <sup>a</sup> |
|----------|-----------------------|---------------------------|----------------------------|--------------|----|-----|-----|-----------------------------|--------------------------|----------------|----------------|----------------|-----------------|
| HAgeoA   | Medium-quality draft  | 78.5                      | 1.5                        | 15           | Y  | Y   | Y   | c__Deltaproteobacteria      | 247                      | 42             | 202            | 3              | 0               |
| H1geoB   | Low-quality draft     | 9.4                       | 1.8                        | 11           | Y  | N   | Y   | k__Bacteria                 | 103                      | 93             | 9              | 1              | 0               |
| H1geoC   | Low-quality draft     | 7.7                       | 0.0                        | 10           | N  | N   | N   | k__Bacteria                 | 103                      | 95             | 8              | 0              | 0               |
| H1geoD   | Low-quality draft     | 28.9                      | 0.0                        | 10           | N  | N   | N   | k__Bacteria                 | 103                      | 84             | 19             | 0              | 0               |
| H2geo    | High-quality draft    | 99.4                      | 0.0                        | 20           | Y  | Y   | Y   | c__Deltaproteobacteria      | 247                      | 1              | 246            | 0              | 0               |
| H3lac    | High-quality draft    | 97.4                      | 0.1                        | 18           | Y  | Y   | Y   | o__Lactobacillales          | 472                      | 13             | 458            | 1              | 0               |
| H4act    | High-quality draft    | 95.2                      | 0.0                        | 20           | Y  | Y   | Y   | o__Actinomycetales          | 330                      | 12             | 318            | 0              | 0               |
| H5geo    | High-quality draft    | 100.0                     | 1.0                        | 20           | Y  | Y   | Y   | c__Deltaproteobacteria      | 247                      | 1              | 243            | 3              | 0               |
| H6fir    | High-quality draft    | 100.0                     | 1.5                        | 19           | Y  | Y   | Y   | p__Firmicutes               | 295                      | 0              | 292            | 3              | 0               |
| H7geo    | Medium-quality draft  | 98.7                      | 0.0                        | 20           | N  | N   | Y   | c__Deltaproteobacteria      | 246                      | 3              | 243            | 0              | 0               |
| H8spi    | High-quality draft    | 98.9                      | 0.0                        | 20           | Y  | Y   | Y   | k__Bacteria                 | 141                      | 1              | 140            | 0              | 0               |
| H9bac    | High-quality draft    | 100.0                     | 0.8                        | 20           | Y  | Y   | Y   | k__Bacteria                 | 278                      | 0              | 276            | 2              | 0               |
| H10eps   | High-quality draft    | 99.6                      | 0.7                        | 20           | N  | Y   | Y   | p__Proteobacteria           | 395                      | 1              | 391            | 3              | 0               |
| H11bac   | High-quality draft    | 95.6                      | 1.6                        | 20           | Y  | Y   | Y   | k__Bacteria                 | 278                      | 11             | 264            | 3              | 0               |
| H12unc   | High-quality draft    | 94.7                      | 1.3                        | 20           | Y  | Y   | Y   | k__Bacteria                 | 185                      | 7              | 176            | 2              | 0               |
| M1geoA   | High-quality draft    | 91.5                      | 0.6                        | 18           | Y  | Y   | Y   | c__Deltaproteobacteria      | 246                      | 20             | 225            | 1              | 0               |
| M1geoB   | Low-quality draft     | 10.1                      | 1.8                        | 6            | N  | N   | N   | k__Bacteria                 | 103                      | 94             | 8              | 1              | 0               |
| M1geoC   | Low-quality draft     | 6.5                       | 0.0                        | 5            | N  | N   | N   | k__Bacteria                 | 103                      | 97             | 6              | 0              | 0               |
| M1geoD   | Low-quality draft     | 14.4                      | 0.0                        | 7            | N  | N   | N   | k__Bacteria                 | 103                      | 92             | 11             | 0              | 0               |
| M2lac    | High-quality draft    | 98.1                      | 0.5                        | 18           | Y  | Y   | Y   | o__Lactobacillales          | 472                      | 10             | 460            | 2              | 0               |
| M3ppro   | High-quality draft    | 100.0                     | 0.0                        | 19           | N  | Y   | Y   | c__Deltaproteobacteria      | 246                      | 0              | 246            | 0              | 0               |
| M4geo    | High-quality draft    | 99.4                      | 0.0                        | 19           | Y  | N   | Y   | c__Deltaproteobacteria      | 247                      | 1              | 246            | 0              | 0               |
| M5fir    | High-quality draft    | 100.0                     | 1.3                        | 20           | Y  | Y   | Y   | p__Firmicutes               | 295                      | 0              | 293            | 2              | 0               |
| M6act    | High-quality draft    | 96.4                      | 0.1                        | 20           | Y  | Y   | Y   | o__Actinomycetales          | 330                      | 9              | 320            | 1              | 0               |
| M7geo    | High-quality draft    | 98.1                      | 3.2                        | 19           | Y  | N   | Y   | c__Deltaproteobacteria      | 247                      | 4              | 235            | 8              | 0               |
| M8spi    | High-quality draft    | 98.9                      | 0.0                        | 20           | Y  | Y   | Y   | k__Bacteria                 | 141                      | 1              | 140            | 0              | 0               |
| M9unc    | High-quality draft    | 91.3                      | 0.7                        | 20           | N  | Y   | Y   | k__Bacteria                 | 185                      | 14             | 167            | 4              | 0               |
| M10bac   | High-quality draft    | 97.1                      | 4.5                        | 19           | Y  | Y   | Y   | p__Bacteroidetes            | 316                      | 7              | 298            | 11             | 0               |
| M11eps   | High-quality draft    | 100.0                     | 1.2                        | 20           | N  | Y   | Y   | p__Proteobacteria           | 395                      | 0              | 390            | 5              | 0               |
| M12geo   | Medium-quality draft  | 97.4                      | 1.4                        | 13           | N  | N   | N   | c__Deltaproteobacteria      | 246                      | 7              | 235            | 4              | 0               |
| M13tol   | High-quality draft    | 99.9                      | 1.1                        | 18           | Y  | Y   | Y   | c__Gammaproteobacteria      | 312                      | 1              | 309            | 2              | 0               |
| M14spi   | High-quality draft    | 93.8                      | 1.9                        | 19           | Y  | Y   | Y   | k__Bacteria                 | 141                      | 9              | 129            | 3              | 0               |
| M15fir   | Medium-quality draft  | 96.7                      | 4.8                        | 20           | Y  | N   | N   | p__Firmicutes               | 295                      | 12             | 272            | 10             | 1               |
| M17geo   | Medium-quality draft  | 78.5                      | 1.2                        | 16           | N  | N   | N   | c__Deltaproteobacteria      | 247                      | 79             | 164            | 4              | 0               |
| M18tol   | Medium-quality draft  | 54.3                      | 0.0                        | 5            | N  | N   | N   | k__Bacteria                 | 104                      | 66             | 38             | 0              | 0               |
| M19bac   | Medium-quality draft  | 88.1                      | 4.7                        | 18           | Y  | Y   | Y   | k__Bacteria                 | 278                      | 27             | 240            | 11             | 0               |
| M20fir   | Low-quality draft     | 27.0                      | 0.6                        | 5            | N  | N   | N   | p__Firmicutes               | 294                      | 214            | 79             | 1              | 0               |
| M21unc   | Low-quality draft     | 45.4                      | 2.6                        | 13           | Y  | N   | N   | k__Bacteria                 | 185                      | 92             | 90             | 3              | 0               |
| L1geo    | High-quality draft    | 99.3                      | 1.3                        | 20           | N  | Y   | Y   | c__Deltaproteobacteria      | 246                      | 3              | 241            | 2              | 0               |
| L2tol    | High-quality draft    | 100.0                     | 0.6                        | 18           | Y  | Y   | Y   | c__Gammaproteobacteria      | 312                      | 0              | 310            | 2              | 0               |
| L3tol    | Medium-quality draft  | 96.8                      | 0.5                        | 18           | Y  | N   | N   | c__Gammaproteobacteria      | 312                      | 35             | 276            | 1              | 0               |
| L4bac    | High-quality draft    | 96.8                      | 1.0                        | 19           | Y  | Y   | Y   | o__Bacteroidales            | 427                      | 13             | 410            | 4              | 0               |
| L5met    | Medium-quality draft  | 86.2                      | 0.9                        | 19           | Y  | Y   | Y   | p__Euryarchaeota            | 234                      | 27             | 205            | 2              | 0               |
| L6fir    | High-quality draft    | 98.9                      | 1.1                        | 20           | Y  | Y   | Y   | k__Bacteria                 | 149                      | 1              | 147            | 1              | 0               |
| L7ppro   | High-quality draft    | 96.5                      | 0.2                        | 20           | N  | Y   | Y   | c__Deltaproteobacteria      | 246                      | 18             | 227            | 1              | 0               |
| L8spi    | High-quality draft    | 92.9                      | 0.0                        | 20           | Y  | Y   | Y   | k__Bacteria                 | 141                      | 9              | 132            | 0              | 0               |
| L9bac    | High-quality draft    | 99.5                      | 4.5                        | 20           | Y  | N   | Y   | p__Bacteroidetes            | 316                      | 1              | 304            | 11             | 0               |
| L10gmet  | High-quality draft    | 98.1                      | 0.1                        | 20           | Y  | Y   | Y   | c__Deltaproteobacteria      | 247                      | 6              | 238            | 2              | 1               |
| L11pro   | High-quality draft    | 99.1                      | 1.8                        | 20           | Y  | Y   | Y   | k__Bacteria                 | 185                      | 1              | 182            | 2              | 0               |
| L12lac   | Medium-quality draft  | 97.9                      | 0.1                        | 17           | Y  | Y   | Y   | o__Lactobacillales          | 472                      | 11             | 460            | 1              | 0               |
| L13fir   | Medium-quality draft  | 98.6                      | 0.7                        | 15           | Y  | N   | Y   | o__Clostridiales            | 249                      | 2              | 244            | 3              | 0               |
| L14bac   | Medium-quality draft  | 97.7                      | 0.8                        | 19           | N  | N   | N   | o__Bacteroidales            | 486                      | 7              | 470            | 9              | 0               |
| L15bac   | Medium-quality draft  | 98.4                      | 0.0                        | 18           | Y  | N   | N   | o__Bacteroidales            | 406                      | 10             | 396            | 0              | 0               |
| L16bac   | Medium-quality draft  | 91.4                      | 1.6                        | 15           | N  | N   | N   | k__Bacteria                 | 278                      | 16             | 259            | 3              | 0               |
| L17bac   | Medium-quality draft  | 92.1                      | 2.3                        | 17           | N  | N   | N   | k__Bacteria                 | 278                      | 27             | 241            | 10             | 0               |
| L18ver   | Medium-quality draft  | 94.4                      | 4.4                        | 18           | Y  | N   | N   | k__Bacteria                 | 230                      | 13             | 209            | 8              | 0               |
| L19bac   | Medium-quality draft  | 84.3                      | 1.8                        | 14           | Y  | Y   | N   | p__Bacteroidetes            | 316                      | 55             | 253            | 8              | 0               |
| L20tol   | Low-quality draft     | 9.5                       | 0.0                        | 0            | N  | N   | N   | k__Bacteria                 | 104                      | 98             | 6              | 0              | 0               |
| L20tolB  | Low-quality draft     | 3.9                       | 0.0                        | 0            | N  | N   | N   | k__Bacteria                 | 104                      | 99             | 5              | 0              | 0               |
| L21met   | Low-quality draft     | 37.9                      | 0.0                        | 11           | N  | N   | N   | k__Archaea                  | 149                      | 103            | 46             | 0              | 0               |
| L22fir   | High-quality draft    | 98.1                      | 1.6                        | 18           | N  | Y   | Y   | o__Selenomonadales          | 334                      | 10             | 312            | 11             | 1               |
| L23elu   | Medium-quality draft  | 91.0                      | 0.0                        | 19           | Y  | N   | N   | k__Bacteria                 | 143                      | 8              | 135            | 0              | 0               |
| L24fir   | Medium-quality draft  | 75.3                      | 1.9                        | 17           | N  | N   | N   | k__Bacteria                 | 161                      | 36             | 123            | 2              | 0               |

<sup>a</sup> Genome completeness and contamination were analyzed by using CheckM software.

Supplementary Table S11. Bin-genome linkage to phylotypes observed in 16S rRNA clone analyses.

| Taxonomy<br>Phylotype                          | H-a5 <sup>a</sup> | M-a5 <sup>a</sup> | L-a5 <sup>a</sup> | %<br>match | Best matched sequence                       | Accession<br>No. | Bin-genome linkage       |                     |                     |
|------------------------------------------------|-------------------|-------------------|-------------------|------------|---------------------------------------------|------------------|--------------------------|---------------------|---------------------|
|                                                |                   |                   |                   |            |                                             |                  | SPH                      | SPM                 | SPL                 |
| <i>Proteobacteria - d-Proteobacteria</i>       |                   |                   |                   |            |                                             |                  |                          |                     |                     |
| <b>MEC_GeoH3</b>                               | 23                | -                 | -                 | 98         | <i>Geobacter humireducens</i>               | AY187306         | H1geo(pan)               | M17geo              | -                   |
| <b>G11</b>                                     | 6                 | -                 | -                 | 96         | <i>Geobacter</i> sp. CdA-2                  | Y19190           | H2geo                    | M4geo               | -                   |
| <b>Su5</b>                                     | -                 | 7                 | -                 | 98         | <i>Pelobacter propionicus</i> DSM 2379      | CP000482         | -                        | M3ppro              | -                   |
| <b>G12</b>                                     | -                 | -                 | -                 | 97         | <i>Geobacter</i> sp. Ply1                   | EF527233         | -                        | -                   | L7ppro <sup>b</sup> |
| <b>G115</b>                                    | -                 | 19                | 4                 | 95         | <i>Geobacter chapelleii</i>                 | U41561           | -                        | M1geo(pan)          | L1geo               |
| <b>MEC_GeoM2</b>                               | -                 | 7                 | -                 | 99         | <i>Geobacter bremensis</i>                  | JN795198         | -                        | M7geo <sup>b</sup>  | -                   |
| <b>Su6</b>                                     | -                 | -                 | -                 | 99         | <i>Geobacter</i> sp. OSK6                   | AB682759         | H5geo                    | -                   | -                   |
| <b>Ha4_I01</b>                                 | 4                 | -                 | -                 | 99         | <i>Geobacter</i> sp. CLFeRB                 | DQ086800         | H7geo                    | M12geo              | -                   |
| <b>Geo1</b>                                    | -                 | 2                 | -                 | 96         | <i>Geobacter metallireducens</i> GS-15      | CP000148         | -                        | -                   | L10gmet             |
| <b>Ha2_G01</b>                                 | -                 | 1                 | -                 | 99         | <i>Desulfovibrio desulfuricans</i> SRB-22   | FJ873799         | -                        | -                   | -                   |
| <i>Proteobacteria - g-Proteobacteria</i>       |                   |                   |                   |            |                                             |                  |                          |                     |                     |
| <b>ToI5</b>                                    | 3                 | 22                | 69                | 99         | <i>Tolomonas</i> sp. OCF                    | GU370947         | -                        | M13tol              | L3tol               |
|                                                |                   |                   |                   |            |                                             |                  | -                        | -                   | L2tol               |
|                                                |                   |                   |                   |            |                                             |                  | -                        | M18tol              | -                   |
| <b>MEC_TOL2</b>                                | 10                | -                 | 1                 | 96         | <i>Tolomonas auensis</i> DSM 9187           | CP001616         | $\gamma$ -Proteobacteria | -                   | L20tol              |
| <b>G113</b>                                    | 1                 | -                 | -                 | 97         | <i>Aeromonas sharmana</i> GPTSA-6           | DQ013306         | -                        | -                   | -                   |
| <i>Proteobacteria - e-Proteobacteria</i>       |                   |                   |                   |            |                                             |                  |                          |                     |                     |
| <b>Ma3_I21</b>                                 | 2                 | 6                 | -                 | 98         | <i>Sulfurospirillum deleyianum</i> DSM 6946 | CP001816         | H10eps                   | M11eps              | -                   |
| <i>Firmicutes - Bacilli</i>                    |                   |                   |                   |            |                                             |                  |                          |                     |                     |
| <b>G117</b>                                    | 33                | 10                | -                 | 100        | <i>Lactococcus</i> sp. JXZ-2                | JF496551         | H3lac                    | M2lac               | L12lac              |
| <i>Firmicutes - Clostridia / Negativicutes</i> |                   |                   |                   |            |                                             |                  |                          |                     |                     |
| <b>G118</b>                                    | 7                 | 10                | -                 | 99         | <i>Anaerovibrio burkinabensis</i> DSM6283   | AJ010961         | H6fir                    | M5fir               | -                   |
| <b>G113</b>                                    | -                 | 1                 | 4                 | 98         | <i>Acetobacterium submarinus</i>            | AY485791         | -                        | -                   | L13fir              |
| <b>Ma4_P11</b>                                 | -                 | 2                 | -                 | 99         | <i>Anaeroarcus burkinensis</i> DSM 6283     | NR_025298        | -                        | M15fir <sup>b</sup> | -                   |
| <b>Hb2_E04</b>                                 | -                 | -                 | 3                 | 92         | <i>Phascolarctobacterium</i> sp. YIT 12068  | AB490812         | -                        | -                   | L6fir               |
| <b>Hb1_O19</b>                                 | -                 | -                 | -                 | 90         | <i>Acidaminococcus intestini</i> ADV 255.99 | NR_041894        | -                        | -                   | L22fir              |
| <b>Ma3_I07</b>                                 | 1                 | 1                 | -                 | 94         | <i>Acidaminococcus fermentans</i> DSM20731  | CP001859         | -                        | -                   | -                   |
| <i>Unlinked</i>                                | -                 | -                 | -                 | -          | <i>Unlinked</i>                             | -                | -                        | M20fir              | -                   |
| <i>Bacteroidetes</i>                           |                   |                   |                   |            |                                             |                  |                          |                     |                     |
| <b>Su2</b>                                     | -                 | -                 | 3                 | 99         | <i>Parabacteroides</i> sp. Lind7H           | HQ020488         | -                        | -                   | L4bac               |
| <b>La4_A15</b>                                 | -                 | -                 | -                 | 90         | <i>Paludibacter propionicigenes</i> WB4     | CP002345         | H9bac                    | -                   | -                   |
| <b>La3_B11</b>                                 | -                 | 1                 | -                 | 90         | <i>Porphyromonadaceae</i> bacterium C941    | JF803519         | -                        | M10bac              | L9bac               |
| <b>G110</b>                                    | 1                 | 1                 | 2                 | 85         | <i>Bacteroidetes</i> bacterium 4F6B         | AB623230         | H11bac                   | M19bac              | L16bac              |
| <i>Unlinked</i>                                | -                 | -                 | -                 | -          | <i>Unlinked Bacteroidetes</i>               | -                | -                        | -                   | L14bac              |
| <i>Unlinked</i>                                | -                 | -                 | -                 | -          | <i>Unlinked Bacteroidetes</i>               | -                | -                        | Bact                | L15bac              |
| <i>Unlinked</i>                                | -                 | -                 | -                 | -          | <i>Unlinked Bacteroidetes</i>               | -                | -                        | -                   | L17bac              |
| <i>Unlinked</i>                                | -                 | -                 | -                 | -          | <i>Unlinked Bacteroidetes</i>               | -                | -                        | -                   | L19bac              |
| Other clones                                   |                   |                   |                   |            |                                             |                  |                          |                     |                     |
| <b>Hb4_A12</b>                                 | -                 | -                 | -                 | 95         | <i>Geothrix fermentans</i> H5               | NR_036779        | H12unc                   | M21unc              | L11pro              |
| <i>Unlinked</i>                                | -                 | -                 | -                 | 98         | <i>Geothrix fermentans</i> HradG1           | HF559181         | -                        | M9unc               | -                   |
| <i>Unlinked</i>                                | -                 | -                 | -                 | 99         | <i>Propionicimonas paludicola</i> Wd        | NR_104769        | H4act                    | M6act               | -                   |
| <i>Unlinked</i>                                | -                 | -                 | -                 | 95         | <i>Treponema stenostreptum</i> 3S-CHLI6-a   | MG264272         | H8spi                    | M8spi               | L8spi               |
| <i>Unlinked</i>                                | -                 | -                 | -                 | 94         | <i>Treponema</i> sp. HM                     | KP297860         | -                        | M14spi              | -                   |
| <i>Unlinked</i>                                | -                 | -                 | -                 | -          | <i>Unlinked Verrucomicrobia</i>             | -                | -                        | -                   | L18ver              |
| <i>Unlinked</i>                                | -                 | -                 | -                 | -          | <i>Unlinked Bacteria</i>                    | -                | -                        | -                   | L23elu              |
| <i>Euryarcheota</i>                            |                   |                   |                   |            |                                             |                  |                          |                     |                     |
| <i>Unlinked</i>                                | -                 | -                 | -                 | 99         | <i>Methanocorpusculum sinense</i> DSM 4274  | NR117148         | -                        | -                   | L5met               |
| <i>Unlinked</i>                                | -                 | -                 | -                 | -          | <i>Unlinked</i>                             | -                | -                        | -                   | L21met              |
| Total clones                                   | 95                | 91                | 90                |            |                                             | Total Bingenomes | 12                       | 20                  | 23                  |

<sup>a</sup> 16S rRNA basis clone analyses were referred from our previous work (Ishii et al. 2015. ISME J. 8:963)

<sup>b</sup> Linkage was estimated from phylogenetic trees.





Supplementary Table 13. Analysis of ANIb and TETRA among the recovered bin-genomes for other dominant microbes in the communities.

\* Operational Candidate Species (OCS) is defined by TETRA >0.99 and ANIb >97

| TETRA                        | Tolomonas auensis |        |         |        |        |       |      | Tolomonas lignilytica |      |      | Acetobacterium dehalogenans<br>Acetobacterium wieringae |      |       | Acetobacterium bakii<br>Acetobacterium woodii |       |        | Anaerococcus burkinensis |       |        | Methanocorpusculum labreanum |        | Methanocorpusculum bavaricum |       | M2lac<br>L12lac<br>H3lac |      |      | H4actB<br>H4actA<br>M6act |      |  |
|------------------------------|-------------------|--------|---------|--------|--------|-------|------|-----------------------|------|------|---------------------------------------------------------|------|-------|-----------------------------------------------|-------|--------|--------------------------|-------|--------|------------------------------|--------|------------------------------|-------|--------------------------|------|------|---------------------------|------|--|
|                              | L2tol             | M18tol | L20tolB | M13tol | L20tol | L3tol |      |                       |      |      |                                                         |      | L6fir | M5fir                                         | H6fir | L21met | L5met                    | M2lac | L12lac | H3lac                        | H4actB | H4actA                       | M6act |                          |      |      |                           |      |  |
| L2tol                        | ---               | 1.00   | 0.98    | 0.98   | 0.97   | 0.96  | 0.93 | 0.91                  | 0.85 | 0.84 | 0.83                                                    | 0.79 | 0.78  | 0.66                                          | 0.57  | 0.55   | 0.55                     | 0.51  | 0.46   | 0.46                         | 0.44   | 0.40                         | 0.39  | 0.39                     | 0.41 | 0.36 | 0.36                      |      |  |
| M18tol                       | 1.00              | ---    | 0.98    | 0.98   | 0.97   | 0.97  | 0.92 | 0.90                  | 0.85 | 0.84 | 0.83                                                    | 0.79 | 0.78  | 0.66                                          | 0.56  | 0.55   | 0.54                     | 0.49  | 0.44   | 0.44                         | 0.43   | 0.41                         | 0.40  | 0.39                     | 0.40 | 0.34 | 0.34                      |      |  |
| L20tolB                      | 0.98              | 0.98   | ---     | 0.97   | 0.97   | 0.98  | 0.93 | 0.90                  | 0.84 | 0.84 | 0.84                                                    | 0.80 | 0.80  | 0.64                                          | 0.55  | 0.53   | 0.53                     | 0.45  | 0.41   | 0.39                         | 0.37   | 0.44                         | 0.43  | 0.42                     | 0.34 | 0.27 | 0.27                      |      |  |
| Tolomonas auensis            | 0.98              | 0.98   | 0.97    | ---    | 0.99   | 0.98  | 0.95 | 0.95                  | 0.83 | 0.82 | 0.81                                                    | 0.78 | 0.80  | 0.66                                          | 0.53  | 0.51   | 0.50                     | 0.48  | 0.44   | 0.43                         | 0.42   | 0.39                         | 0.38  | 0.38                     | 0.38 | 0.31 | 0.31                      |      |  |
| M13tol                       | 0.97              | 0.97   | 0.97    | 0.99   | ---    | 0.99  | 0.93 | 0.93                  | 0.81 | 0.80 | 0.79                                                    | 0.76 | 0.77  | 0.62                                          | 0.49  | 0.47   | 0.46                     | 0.45  | 0.40   | 0.40                         | 0.39   | 0.36                         | 0.36  | 0.35                     | 0.34 | 0.28 | 0.28                      |      |  |
| L20tol                       | 0.96              | 0.97   | 0.98    | 0.98   | 0.99   | ---   | 0.92 | 0.92                  | 0.81 | 0.80 | 0.79                                                    | 0.76 | 0.78  | 0.61                                          | 0.48  | 0.46   | 0.45                     | 0.42  | 0.37   | 0.37                         | 0.36   | 0.37                         | 0.36  | 0.36                     | 0.31 | 0.25 | 0.25                      |      |  |
| Tolomonas lignilytica        | 0.93              | 0.92   | 0.93    | 0.95   | 0.93   | 0.92  | ---  | 0.97                  | 0.81 | 0.79 | 0.79                                                    | 0.76 | 0.80  | 0.67                                          | 0.58  | 0.56   | 0.55                     | 0.49  | 0.47   | 0.43                         | 0.43   | 0.46                         | 0.45  | 0.45                     | 0.36 | 0.26 | 0.26                      |      |  |
| L3tol                        | 0.91              | 0.90   | 0.90    | 0.95   | 0.93   | 0.92  | 0.97 | ---                   | 0.77 | 0.75 | 0.75                                                    | 0.71 | 0.77  | 0.63                                          | 0.53  | 0.51   | 0.50                     | 0.47  | 0.45   | 0.42                         | 0.42   | 0.41                         | 0.39  | 0.39                     | 0.35 | 0.26 | 0.26                      |      |  |
| Acetobacterium dehalogenans  | 0.85              | 0.85   | 0.84    | 0.83   | 0.81   | 0.81  | 0.81 | 0.77                  | ---  | 0.98 | 0.98                                                    | 0.94 | 0.93  | 0.77                                          | 0.71  | 0.70   | 0.69                     | 0.56  | 0.54   | 0.50                         | 0.48   | 0.45                         | 0.43  | 0.42                     | 0.48 | 0.38 | 0.38                      |      |  |
| Acetobacterium wieringae     | 0.84              | 0.84   | 0.84    | 0.82   | 0.80   | 0.80  | 0.79 | 0.75                  | 0.98 | ---  | 1.00                                                    | 0.93 | 0.91  | 0.74                                          | 0.71  | 0.70   | 0.69                     | 0.50  | 0.47   | 0.44                         | 0.42   | 0.43                         | 0.41  | 0.41                     | 0.42 | 0.32 | 0.32                      |      |  |
| L13fir                       | 0.83              | 0.83   | 0.84    | 0.81   | 0.79   | 0.79  | 0.79 | 0.75                  | 0.98 | 1.00 | ---                                                     | 0.92 | 0.91  | 0.73                                          | 0.71  | 0.70   | 0.69                     | 0.49  | 0.46   | 0.43                         | 0.41   | 0.44                         | 0.42  | 0.42                     | 0.40 | 0.30 | 0.30                      |      |  |
| Acetobacterium bakii         | 0.79              | 0.79   | 0.80    | 0.78   | 0.76   | 0.76  | 0.76 | 0.71                  | 0.94 | 0.93 | 0.92                                                    | ---  | 0.92  | 0.75                                          | 0.73  | 0.72   | 0.71                     | 0.52  | 0.49   | 0.44                         | 0.43   | 0.46                         | 0.44  | 0.43                     | 0.44 | 0.34 | 0.25                      | 0.25 |  |
| Acetobacterium woodii        | 0.78              | 0.78   | 0.80    | 0.80   | 0.77   | 0.78  | 0.80 | 0.77                  | 0.93 | 0.91 | 0.91                                                    | 0.92 | ---   | 0.80                                          | 0.70  | 0.68   | 0.67                     | 0.54  | 0.51   | 0.44                         | 0.44   | 0.53                         | 0.52  | 0.51                     | 0.36 | 0.27 | 0.27                      |      |  |
| L6fir                        | 0.66              | 0.66   | 0.64    | 0.66   | 0.62   | 0.61  | 0.67 | 0.63                  | 0.77 | 0.74 | 0.73                                                    | 0.75 | 0.80  | ---                                           | 0.66  | 0.65   | 0.64                     | 0.47  | 0.46   | 0.37                         | 0.38   | 0.59                         | 0.57  | 0.57                     | 0.37 | 0.30 | 0.31                      |      |  |
| Anaerococcus burkinensis     | 0.57              | 0.56   | 0.55    | 0.53   | 0.49   | 0.48  | 0.58 | 0.53                  | 0.71 | 0.71 | 0.71                                                    | 0.73 | 0.70  | 0.66                                          | ---   | 1.00   | 1.00                     | 0.57  | 0.60   | 0.53                         | 0.54   | 0.45                         | 0.43  | 0.43                     | 0.47 | 0.35 | 0.35                      |      |  |
| M5fir                        | 0.55              | 0.55   | 0.53    | 0.51   | 0.47   | 0.46  | 0.56 | 0.51                  | 0.70 | 0.70 | 0.70                                                    | 0.72 | 0.68  | 0.65                                          | 1.00  | ---    | 1.00                     | 0.58  | 0.61   | 0.55                         | 0.55   | 0.45                         | 0.43  | 0.43                     | 0.50 | 0.38 | 0.37                      |      |  |
| H6fir                        | 0.55              | 0.54   | 0.53    | 0.50   | 0.46   | 0.45  | 0.55 | 0.50                  | 0.69 | 0.69 | 0.69                                                    | 0.71 | 0.67  | 0.64                                          | 1.00  | 1.00   | ---                      | 0.58  | 0.61   | 0.55                         | 0.55   | 0.45                         | 0.42  | 0.42                     | 0.49 | 0.37 | 0.37                      |      |  |
| L21met                       | 0.51              | 0.49   | 0.45    | 0.48   | 0.45   | 0.42  | 0.49 | 0.47                  | 0.56 | 0.50 | 0.49                                                    | 0.52 | 0.54  | 0.47                                          | 0.57  | 0.58   | 0.58                     | ---   | 0.98   | 0.97                         | 0.97   | 0.17                         | 0.15  | 0.15                     | 0.58 | 0.48 | 0.48                      |      |  |
| Methanocorpusculum labreanum | 0.46              | 0.44   | 0.41    | 0.44   | 0.40   | 0.37  | 0.47 | 0.45                  | 0.54 | 0.47 | 0.46                                                    | 0.49 | 0.51  | 0.46                                          | 0.60  | 0.61   | 0.61                     | 0.98  | ---    | 0.96                         | 0.97   | 0.17                         | 0.15  | 0.15                     | 0.62 | 0.52 | 0.52                      |      |  |
| L5met                        | 0.46              | 0.44   | 0.39    | 0.43   | 0.40   | 0.37  | 0.43 | 0.42                  | 0.50 | 0.44 | 0.43                                                    | 0.44 | 0.44  | 0.37                                          | 0.53  | 0.55   | 0.55                     | 0.97  | 0.96   | ---                          | 0.99   | 0.05                         | 0.03  | 0.03                     | 0.61 | 0.51 | 0.51                      |      |  |
| Methanocorpusculum bavaricum | 0.44              | 0.43   | 0.37    | 0.42   | 0.39   | 0.36  | 0.43 | 0.42                  | 0.48 | 0.42 | 0.41                                                    | 0.43 | 0.44  | 0.38                                          | 0.54  | 0.55   | 0.55                     | 0.97  | 0.97   | 0.99                         | ---    | 0.06                         | 0.04  | 0.04                     | 0.62 | 0.51 | 0.51                      |      |  |
| M2lac                        | 0.40              | 0.41   | 0.44    | 0.39   | 0.36   | 0.37  | 0.46 | 0.41                  | 0.45 | 0.43 | 0.44                                                    | 0.46 | 0.53  | 0.59                                          | 0.45  | 0.45   | 0.45                     | 0.17  | 0.17   | 0.05                         | 0.06   | ---                          | 1.00  | 1.00                     | 0.19 | 0.12 | 0.12                      |      |  |
| L12lac                       | 0.39              | 0.40   | 0.43    | 0.38   | 0.36   | 0.36  | 0.45 | 0.39                  | 0.43 | 0.41 | 0.42                                                    | 0.44 | 0.52  | 0.57                                          | 0.43  | 0.43   | 0.42                     | 0.15  | 0.15   | 0.03                         | 0.04   | 1.00                         | ---   | 1.00                     | 0.18 | 0.11 | 0.11                      |      |  |
| H3lac                        | 0.39              | 0.39   | 0.42    | 0.38   | 0.35   | 0.36  | 0.45 | 0.39                  | 0.42 | 0.41 | 0.42                                                    | 0.43 | 0.51  | 0.57                                          | 0.43  | 0.43   | 0.42                     | 0.15  | 0.15   | 0.03                         | 0.04   | 1.00                         | 1.00  | ---                      | 0.18 | 0.11 | 0.11                      |      |  |
| H4actB                       | 0.41              | 0.40   | 0.34    | 0.38   | 0.34   | 0.31  | 0.36 | 0.35                  | 0.48 | 0.42 | 0.40                                                    | 0.34 | 0.36  | 0.37                                          | 0.47  | 0.50   | 0.49                     | 0.58  | 0.62   | 0.61                         | 0.62   | 0.19                         | 0.18  | 0.18                     | ---  | 0.94 | 0.94                      |      |  |
| H4act                        | 0.36              | 0.34   | 0.27    | 0.31   | 0.28   | 0.25  | 0.26 | 0.26                  | 0.38 | 0.32 | 0.30                                                    | 0.25 | 0.27  | 0.30                                          | 0.35  | 0.38   | 0.37                     | 0.48  | 0.52   | 0.51                         | 0.51   | 0.12                         | 0.11  | 0.11                     | 0.94 | ---  | 1.00                      |      |  |
| M6act                        | 0.36              | 0.34   | 0.27    | 0.31   | 0.28   | 0.25  | 0.26 | 0.26                  | 0.38 | 0.32 | 0.30                                                    | 0.25 | 0.27  | 0.31                                          | 0.35  | 0.37   | 0.37                     | 0.48  | 0.52   | 0.51                         | 0.51   | 0.12                         | 0.11  | 0.11                     | 0.94 | 1.00 | ---                       |      |  |

| ANIb                        | Tolomonas auensis |        |         |        |        |       |      | Tolomonas lignilytica |      |      | Acetobacterium dehalogenans<br>Acetobacterium wieringae |      |       | Acetobacterium bakii<br>Acetobacterium woodii |       |        | Anaerococcus burkinensis |       |        | Methanocorpusculum labreanum |        | Methanocorpusculum bavaricum |       | M2lac<br>L12lac<br>H3lac |      |      | H4actB<br>H4actA<br>M6act |      |      |      |
|-----------------------------|-------------------|--------|---------|--------|--------|-------|------|-----------------------|------|------|---------------------------------------------------------|------|-------|-----------------------------------------------|-------|--------|--------------------------|-------|--------|------------------------------|--------|------------------------------|-------|--------------------------|------|------|---------------------------|------|------|------|
|                             | L2tol             | M18tol | L20tolB | M13tol | L20tol | L3tol |      |                       |      |      |                                                         |      | L6fir | M5fir                                         | H6fir | L21met | L5met                    | M2lac | L12lac | H3lac                        | H4actB | H4actA                       | M6act |                          |      |      |                           |      |      |      |
| L2tol                       | ---               | 99.1   | 78.5    | 83.6   | 83.3   | 77.5  | 79.1 | 78.5                  | 60.4 | 60.8 | 60.3                                                    | 59.7 | 60.8  | 59.1                                          | 60.3  | 60.8   | 60.6                     | 60.4  | 59.9   | 58.8                         | 59.8   | 60.6                         | 60.2  | 60.5                     | 60.6 | 60.2 | 60.5                      | 64.4 | 61.5 | 61.6 |
| M18tol                      | 99.5              | ---    | 79.2    | 82.3   | 81.6   | 78.1  | 77.8 | 77.5                  | 61.8 | 61.9 | 62.3                                                    | 61.6 | 62.8  | 60.3                                          | 62.0  | 61.9   | 61.9                     | 60.0  | 62.2   | 61.1                         | 61.1   | 61.7                         | 61.4  | 61.3                     | 61.8 | 61.8 | 62.7                      | 62.6 |      |      |
| L20tolB                     | 80.4              | 80.6   | ---     | 78.8   | 78.2   | 76.8  | 73.4 | 73.2                  | 62.7 | 63.0 | 63.3                                                    | 61.1 | 60.1  | NaN                                           | 58.9  | 58.2   | 57.8                     | NaN   | NaN    | NaN                          | NaN    | 59.3                         | 59.3  | 59.3                     | 60.9 | 60.1 | 60.2                      |      |      |      |
| Tolomonas auensis           | 83.7              | 81.6   | 77.6    | ---    | 91.9   | 89.9  | 79.6 | 80.6                  | 60.9 | 63.7 | 59.9                                                    | 64.9 | 64.5  | 59.5                                          | 61.1  | 63.8   | 60.9                     | 61.2  | 61.6   | 59.3                         | 61.2   | 61.0                         | 61.0  | 61.0                     | 61.9 | 64.2 | 62.9                      |      |      |      |
| M13tol                      | 83.5              | 81.1   | 77.1    | 92.1   | ---    | 97.7  | 79.4 | 80.4                  | 60.1 | 60.5 | 60.4                                                    | 61.0 | 60.2  | 59.7                                          | 61.0  | 60.8   | 60.6                     | 59.4  | 58.9   | 59.0                         | 59.6   | 61.1                         | 61.0  | 61.0                     | 59.5 | 60.9 | 60.9                      |      |      |      |
| L20tol                      | 79.2              | 78.9   | 76.8    | 90.9   | 98.3   | ---   | 76.4 | 77.4                  | 62.5 | 62.8 | 60.6                                                    | 62.0 | 60.8  | 64.0                                          | 64.6  | 63.9   | 63.5                     | NaN   | 57.0   | NaN                          | NaN    | 63.2                         | 63.2  | 63.2                     | NaN  | 62.9 | 62.9                      |      |      |      |
| Tolomonas lignilytica       | 79.1              | 77.3   | 71.9    | 79.5   | 79.3   | 75.5  | ---  | 77.4                  | 61.3 | 64.2 | 60.8                                                    | 63.8 | 64.5  | 60.7                                          | 60.1  | 63.0   | 60.4                     | 59.7  | 60.8   | 60.0                         | 61.6   | 61.8                         | 61.5  | 61.6                     | 55.5 | 65.0 | 63.8                      |      |      |      |
| L3tol                       | 78.6              | 76.9   | 73.1    | 80.6   | 80.4   | 76.3  | 77.4 | ---                   | 60.4 | 60.9 | 60.4                                                    | 60.2 | 60.5  | 59.8                                          | 60.2  | 60.2   | 60.3                     | 59.6  | 58.4   | 57.5                         | 57.6   | 61.5                         | 61.1  | 61.4                     | 63.0 | 60.2 | 59.9                      |      |      |      |
| Acetobacterium dehalogenans | 60.8              | 60.9   | 64.7    | 61.1   | 60.9   | 64.7  | 61.8 | 61.0                  | ---  | 83.2 | 82.6                                                    | 73.8 | 76.6  | 61.3                                          | 62.0  | 61.7   | 61.9                     | 59.3  | 60.2   | 59.8                         | 59.8   | 61.0                         | 60.9  | 60.9                     | 58.8 | 60.2 | 60.4                      |      |      |      |
| Acetobacterium wieringae    | 61.2              | 62.0   | 62.9    | 61.4   | 60.3   | 62.6  | 62.2 | 60.8                  | 83.4 | ---  | 93.6                                                    | 73.4 | 76.0  | 60.7                                          | 61.9  | 62.1   | 61.7                     | 61.5  | 61.2   | 60.8                         | 60.6   | 61.2                         | 61.3  | 61.2                     | 58.5 | 62.8 | 62.4                      |      |      |      |
| L13fir                      | 60.6              | 61.0   | 63.2    | 60.3   | 60.4   | 62.3  | 60.4 | 60.4                  | 82.9 | 93.7 | ---                                                     | 73.3 | 76.1  | 59.9                                          | 61.8  | 61.7   | 61.8                     | 59.9  | 60.1   | 59.4                         | 60.2   | 60.7                         | 60.7  | 60.7                     | 60.1 | 60.0 | 60.1                      |      |      |      |
| Acetobacterium bakii        | 60.5              | 60.6   | 63.8    | 61.0   | 60.5   | 63.1  | 61.0 | 60.2                  | 73.8 | 73.4 | 73.2                                                    | ---  | 73.3  | 60.2                                          | 61.4  | 61.9   | 61.7                     | 60.3  | 60.1   | 60.2                         | 60.1   | 60.5                         | 60.5  | 60.6                     | NaN  | 62.0 | 61.5                      |      |      |      |
| Acetobacterium woodii       | 61.9              | 61.5   | 58.9    | 63.8   | 61.3   | 59.4  | 63.9 | 61.0                  | 76.8 | 76.0 | 75.9                                                    | 73.3 | ---   | 61.8                                          | 61.8  | 63.1   | 61.8                     | 63.2  | 61.5   | 61.2                         | 62.0   | 61.7                         | 61.8  | 61.7                     | 58.5 | 66.5 | 63.8                      |      |      |      |
| L6fir                       |                   |        |         |        |        |       |      |                       |      |      |                                                         |      |       |                                               |       |        |                          |       |        |                              |        |                              |       |                          |      |      |                           |      |      |      |

Supplementary Table S14. Summary of mRNA and DNA read counts and RPKM calculation for SP-H bin-genomes.

| Bin-genome ID        | Total bases of ORFs | Mapped reads count to ORFs <sup>a</sup> |         |          |         |          |                         |         |        |        |        | DNA-RPKM <sup>b</sup> |      |      |      |      | mRNA-RPKM after normalization <sup>c</sup> |             |      |      |      |       |      |       |      |      |       |       |
|----------------------|---------------------|-----------------------------------------|---------|----------|---------|----------|-------------------------|---------|--------|--------|--------|-----------------------|------|------|------|------|--------------------------------------------|-------------|------|------|------|-------|------|-------|------|------|-------|-------|
|                      |                     | metagenomic DNA                         |         |          |         |          | metatranscriptomic mRNA |         |        |        |        | Total                 | Cn1  | Cn2  | Cn3  | Cn4  | Cn5                                        | Total       | Cn1  | Cn2  | Cn3  | Cn4   | Cn5  |       |      |      |       |       |
|                      |                     | Cn1                                     | Cn2     | Cn3      | Cn4     | Cn5      | Total                   | Cn1     | Cn2    | Cn3    | Cn4    |                       |      |      |      |      |                                            |             |      |      |      |       |      | Cn5   |      |      |       |       |
| <b>H1geoA</b>        | 2,442,280           | 1907212                                 | 2024868 | 1642070  | 7191682 | 1639202  | 14405044                | 164794  | 139556 | 102666 | 65006  | 104796                | 77.9 | 81.2 | 70.9 | 89.1 | 63.3                                       | <b>80.4</b> | 46.0 | 46.7 | 39.0 | 33.1  | 80.6 | 47.5  | 46.2 | 44.3 | 29.8  | 102.5 |
| <b>H1geoB</b>        | 1,586,911           | 884176                                  | 973548  | 556956   | 3465043 | 616766   | 6496509                 | 68141   | 55099  | 29953  | 31913  | 28089                 | 53.6 | 58.0 | 35.7 | 63.7 | 35.3                                       | <b>53.8</b> | 28.2 | 27.3 | 16.8 | 24.1  | 32.1 | 28.3  | 25.4 | 25.4 | 20.3  | 48.9  |
| <b>H1geoC</b>        | 1,645,543           | 553662                                  | 536042  | 775996   | 1849990 | 680020   | 4395710                 | 21964   | 17672  | 28400  | 13437  | 25645                 | 32.2 | 30.6 | 47.7 | 32.7 | 37.4                                       | <b>34.9</b> | 8.7  | 8.4  | 15.4 | 9.7   | 28.1 | 9.5   | 9.6  | 11.3 | 10.4  | 26.3  |
| <b>H1geoD</b>        | 2,848,753           | 481327                                  | 379815  | 283965   | 1304439 | 410132   | 2859678                 | 20689   | 13899  | 10240  | 10231  | 15164                 | 16.6 | 12.9 | 10.3 | 13.7 | 13.4                                       | <b>13.5</b> | 4.9  | 3.9  | 3.3  | 4.4   | 9.9  | 4.0   | 4.1  | 4.3  | 4.3   | 9.9   |
| <b>H2geo</b>         | 3,047,821           | 1025431                                 | 888484  | 1123199  | 3367952 | 997408   | 7402474                 | 70391   | 38854  | 37418  | 17366  | 37101                 | 33.3 | 28.3 | 38.5 | 33.2 | 30.6                                       | <b>32.9</b> | 15.6 | 10.3 | 11.3 | 7.0   | 22.7 | 15.4  | 12.0 | 9.6  | 7.0   | 24.4  |
| <b>H3lac</b>         | 1,668,484           | 454182                                  | 465034  | 530435   | 1599901 | 704179   | 3753731                 | 227823  | 16472  | 82569  | 189427 | 11417                 | 26.7 | 26.9 | 33.0 | 28.6 | 39.2                                       | <b>30.2</b> | 91.6 | 77.8 | 45.2 | 138.8 | 12.7 | 103.4 | 87.4 | 41.4 | 146.7 | 9.8   |
| <b>H4act</b>         | 3,131,599           | 1014566                                 | 1004277 | 1093265  | 2442420 | 866713   | 6421241                 | 325874  | 313790 | 320297 | 175094 | 124470                | 33.3 | 32.3 | 37.9 | 24.3 | 26.9                                       | <b>28.8</b> | 73.0 | 84.3 | 97.8 | 71.5  | 76.9 | 63.1  | 75.0 | 74.3 | 84.7  | 82.4  |
| <b>H5geo</b>         | 3,724,696           | 637279                                  | 721533  | 536805   | 2540914 | 841621   | 5278152                 | 31712   | 34047  | 30587  | 13675  | 20286                 | 16.9 | 18.8 | 15.1 | 20.5 | 21.1                                       | <b>19.1</b> | 5.7  | 7.4  | 7.6  | 4.5   | 10.1 | 6.5   | 7.5  | 9.6  | 4.2   | 9.2   |
| <b>H6fir</b>         | 2,786,110           | 284381                                  | 301813  | 335376   | 933603  | 535766   | 2390939                 | 138168  | 133160 | 155904 | 76214  | 4637                  | 10.2 | 10.6 | 12.7 | 10.2 | 18.2                                       | <b>11.7</b> | 33.9 | 39.2 | 52.1 | 34.1  | 3.1  | 38.9  | 43.2 | 48.1 | 39.3  | 2.0   |
| <b>H7geo</b>         | 3,185,047           | 343230                                  | 388578  | 321400   | 1098554 | 613104   | 2764866                 | 38512   | 27791  | 23799  | 11860  | 18512                 | 11.1 | 12.3 | 11.0 | 10.8 | 18.7                                       | <b>12.2</b> | 8.5  | 7.4  | 7.2  | 4.8   | 11.3 | 9.4   | 7.3  | 8.0  | 5.4   | 7.3   |
| <b>H8spi</b>         | 2,993,938           | 253760                                  | 261249  | 220276   | 610209  | 2483066  | 1593800                 | 47502   | 29935  | 26308  | 22288  | 17909                 | 8.9  | 9.0  | 8.1  | 6.5  | 8.2                                        | <b>7.6</b>  | 11.3 | 8.6  | 8.5  | 9.7   | 11.8 | 9.7   | 7.3  | 8.0  | 11.4  | 10.9  |
| <b>H9bac</b>         | 2,823,157           | 124964                                  | 119244  | 118466   | 270477  | 123640   | 756791                  | 20073   | 16476  | 13416  | 6802   | 8230                  | 4.3  | 4.0  | 4.3  | 2.8  | 4.0                                        | <b>3.5</b>  | 4.7  | 4.6  | 4.3  | 3.0   | 5.3  | 3.9   | 4.1  | 3.5  | 3.7   | 4.7   |
| <b>H10eps</b>        | 2,555,140           | 89938                                   | 94975   | 87145    | 177099  | 83469    | 532626                  | 11070   | 10457  | 6458   | 4681   | 2582                  | 3.7  | 3.9  | 3.8  | 2.2  | 3.3                                        | <b>3.0</b>  | 3.1  | 3.5  | 2.5  | 2.4   | 2.0  | 2.5   | 2.8  | 2.0  | 3.3   | 1.9   |
| <b>H11bac</b>        | 3,645,112           | 93180                                   | 86130   | 69667    | 154706  | 78533    | 482216                  | 12070   | 9771   | 6753   | 4140   | 5595                  | 2.5  | 2.2  | 1.9  | 1.2  | 2.0                                        | <b>1.7</b>  | 2.2  | 2.1  | 1.7  | 1.4   | 2.8  | 1.5   | 1.6  | 1.5  | 1.9   | 2.5   |
| <b>H12unc</b>        | 4,079,749           | 108985                                  | 118763  | 90340    | 262245  | 146308   | 726641                  | 1905    | 1321   | 1015   | 1594   | 1539                  | 2.7  | 2.9  | 2.4  | 2.0  | 3.4                                        | <b>2.5</b>  | 0.3  | 0.3  | 0.2  | 0.5   | 0.7  | 0.3   | 0.2  | 0.2  | 0.6   | 0.5   |
| <b>H3lacP</b>        | 243,715             | 39760                                   | 41975   | 51670    | 146355  | 59874    | 339634                  | 5901    | 6477   | 6998   | 6555   | 875                   | 15.8 | 16.4 | 21.7 | 17.7 | 22.5                                       | <b>18.5</b> | 16.1 | 21.1 | 25.9 | 32.5  | 6.6  | 18.7  | 23.8 | 22.1 | 34.0  | 5.4   |
| <b>H4actB</b>        | 876,568             | 114039                                  | 128624  | 137961   | 310115  | 122418   | 813157                  | 11264   | 12291  | 12727  | 8507   | 10266                 | 12.5 | 13.8 | 16.0 | 10.3 | 12.7                                       | <b>12.2</b> | 8.4  | 11.0 | 13.0 | 11.6  | 21.2 | 8.2   | 9.7  | 9.9  | 13.7  | 20.4  |
| <b>H6firP</b>        | 126,010             | 13454                                   | 13624   | 15137    | 42228   | 22666    | 107109                  | 384     | 365    | 390    | 198    | 15                    | 10.5 | 10.4 | 12.5 | 10.0 | 16.7                                       | <b>11.4</b> | 2.0  | 2.3  | 2.8  | 1.9   | 0.2  | 2.2   | 2.6  | 2.2  | 0.2   | 0.2   |
| <b>H6firP2</b>       | 45,007              | 4802                                    | 4983    | 5737     | 15116   | 8271     | 38919                   | 150     | 143    | 173    | 99     | 5                     | 10.3 | 10.6 | 13.0 | 9.9  | 16.6                                       | <b>11.4</b> | 2.2  | 2.5  | 3.5  | 2.7   | 0.2  | 2.4   | 2.7  | 3.0  | 3.1   | 0.1   |
| <b>H7geop</b>        | 466,315             | 41294                                   | 47480   | 37692    | 110428  | 65723    | 302517                  | 6463    | 6246   | 5308   | 3742   | 5253                  | 8.8  | 10.0 | 8.5  | 7.2  | 13.3                                       | <b>8.8</b>  | 9.4  | 10.9 | 10.6 | 10.0  | 21.2 | 9.5   | 9.7  | 11.0 | 12.3  | 14.1  |
| Reads to metagenome  | 8914854             | 9073242                                 | 8433708 | 29360208 | 9430577 | 65212589 | 1304911                 | 1089423 | 957349 | 715456 | 472917 |                       |      |      |      |      |                                            | <b>492</b>  | 414  | 409  | 385  | 438   | 386  | 422   | 411  | 364  | 469   | 415   |
| Reads to bin-genomes | 8469622             | 8601049                                 | 8032558 | 27893486 | 8864139 | 61850854 | 1224850                 | 1028822 | 901299 | 662349 | 442388 |                       |      |      |      |      |                                            | <b>492</b>  | 414  | 409  | 385  | 438   | 386  | 422   | 411  | 364  | 469   | 415   |
| % in bin-genome      | 95                  | 95                                      | 95      | 95       | 94      | 95       | 94                      | 95      | 94     | 93     | 94     |                       |      |      |      |      |                                            | <b>492</b>  | 414  | 409  | 385  | 438   | 386  | 422   | 411  | 364  | 469   | 415   |

<sup>a</sup>Raw reads for each condition of both metagenomic DNA and metatranscriptomic mRNA were separately mapped to SP-H ORFs by using similarity cut-off by 0.95 and length cut-off by 0.7.  
<sup>b</sup>RPKM values, Reads Per Kilo-base per Million mapped reads, for both DNA and mRNA samples under five different operational conditions were calculated based on total bases of ORFs in each bin-genome.  
<sup>c</sup>mRNA-RPKM values were normalized by DNA existence fluctuation among five conditions based on DNA-RPKM of each condition divided by DNA-RPKM of total reads.

Supplementary Table S15. Summary of mRNA and DNA read counts and RPKM calculation for SP-M bin-genomes.

| Bin-genome ID        | Total bases of ORFs | Mapped reads count to ORFs <sup>a</sup> |         |          |          |          |                         |        |        |        |        | DNA-RPKM <sup>b</sup>             |                 |       |       |      | mRNA-RPKM <sup>b</sup>           |       |       |       |       |       |       |
|----------------------|---------------------|-----------------------------------------|---------|----------|----------|----------|-------------------------|--------|--------|--------|--------|-----------------------------------|-----------------|-------|-------|------|----------------------------------|-------|-------|-------|-------|-------|-------|
|                      |                     | metagenomic DNA                         |         |          |          |          | metatranscriptomic mRNA |        |        |        |        | before normalization <sup>b</sup> |                 |       |       |      | after normalization <sup>c</sup> |       |       |       |       |       |       |
|                      |                     | C01                                     | C02     | C03      | C04      | C05      | Total                   | C01    | C02    | C03    | C04    | C05                               | Total           | C01   | C02   | C03  | C04                              | C05   | C01   | C02   | C03   | C04   | C05   |
| <b>M1geoA</b>        | 2,715,252           | 3222331                                 | 3249832 | 3433435  | 3747513  | 33980295 | 17151136                | 121133 | 179745 | 109485 | 48115  | 71117                             | 120.0           | 71.2  | 76.6  | 51.5 | 26.2                             | 138.2 | 67.1  | 74.1  | 51.6  | 26.3  | 149.6 |
| <b>M1geoB</b>        | 1,427,715           | 1390908                                 | 1092502 | 1320923  | 1423476  | 1488629  | 6716438                 | 24906  | 27305  | 20553  | 9384   | 17622                             | 86.5            | 27.0  | 21.4  | 17.8 | 9.4                              | 63.0  | 23.8  | 24.2  | 18.1  | 9.7   | 61.0  |
| <b>M1geoC</b>        | 1,205,514           | 390824                                  | 650479  | 549870   | 578586   | 348191   | 2517950                 | 8501   | 20830  | 9956   | 5526   | 4463                              | 38.2            | 10.8  | 19.2  | 10.2 | 6.5                              | 18.8  | 12.7  | 13.7  | 9.3   | 6.2   | 29.1  |
| <b>M1geoD</b>        | 1,892,772           | 278829                                  | 542255  | 278367   | 406400   | 135862   | 1641713                 | 7040   | 28778  | 7865   | 4336   | 1907                              | 15.9            | 5.7   | 17.0  | 5.1  | 3.3                              | 5.1   | 6.2   | 9.4   | 6.1   | 2.9   | 13.3  |
| <b>M2lac</b>         | 1,947,600           | 385823                                  | 568063  | 511706   | 825796   | 577942   | 2869330                 | 142572 | 208897 | 142428 | 274754 | 5049                              | 27.0            | 112.7 | 119.6 | 90.1 | 201.4                            | 13.2  | 153.0 | 110.9 | 101.3 | 153.3 | 14.0  |
| <b>M3ppro</b>        | 4,287,699           | 586786                                  | 456676  | 645577   | 837004   | 1080753  | 3606796                 | 60258  | 78995  | 107307 | 84617  | 9418                              | 15.5            | 21.8  | 19.9  | 31.0 | 28.4                             | 11.2  | 24.4  | 28.8  | 34.7  | 26.8  | 8.0   |
| <b>M4geo</b>         | 3,049,983           | 381124                                  | 329298  | 425948   | 514888   | 333432   | 1994690                 | 5538   | 7418   | 6674   | 4386   | 3285                              | 12.1            | 2.8   | 2.7   | 2.7  | 2.1                              | 5.5   | 2.7   | 3.0   | 2.5   | 1.8   | 7.1   |
| <b>M5fir</b>         | 3,075,351           | 202228                                  | 216429  | 265950   | 340242   | 369662   | 1394511                 | 53756  | 8215   | 97202  | 43139  | 1855                              | 8.5             | 27.4  | 31.8  | 39.7 | 20.4                             | 3.1   | 34.5  | 37.6  | 41.7  | 18.3  | 2.5   |
| <b>M6act</b>         | 3,029,682           | 301683                                  | 374320  | 333095   | 251129   | 295106   | 1555333                 | 20126  | 46662  | 54165  | 13315  | 10571                             | 9.9             | 10.7  | 18.1  | 23.2 | 6.6                              | 18.7  | 10.1  | 13.8  | 21.7  | 9.0   | 21.1  |
| <b>M7geo</b>         | 3,968,730           | 125093                                  | 140364  | 205895   | 57601    | 400432   | 929385                  | 2086   | 3423   | 2345   | 334    | 4961                              | 4.1             | 0.8   | 0.9   | 0.7  | 0.1                              | 6.0   | 1.0   | 1.1   | 0.6   | 0.4   | 3.0   |
| <b>M8spi</b>         | 2,981,820           | 165096                                  | 149203  | 178914   | 163814   | 157371   | 814398                  | 11029  | 13249  | 9332   | 5695   | 3783                              | 5.4             | 6.1   | 5.3   | 4.1  | 2.9                              | 6.9   | 5.5   | 5.3   | 3.8   | 3.2   | 7.7   |
| <b>M9unc</b>         | 2,992,662           | 86489                                   | 116869  | 177905   | 34010    | 174087   | 589360                  | 371    | 491    | 419    | 112    | 310                               | 3.5             | 0.2   | 0.2   | 0.2  | 0.1                              | 0.6   | 0.3   | 0.2   | 0.1   | 0.2   | 0.4   |
| <b>M10bac</b>        | 3,188,667           | 104178                                  | 83289   | 94311    | 154711   | 150431   | 586920                  | 4411   | 10480  | 7045   | 8242   | 8351                              | 3.8             | 2.2   | 3.8   | 2.8  | 3.8                              | 13.7  | 2.3   | 4.9   | 3.5   | 3.2   | 11.5  |
| <b>M11eps</b>        | 2,622,807           | 62662                                   | 68197   | 69221    | 65691    | 93275    | 359046                  | 2870   | 6244   | 4591   | 5258   | 1151                              | 3.3             | 2.6   | 2.8   | 2.6  | 2.3                              | 3.3   | 2.7   | 1.8   | 2.9   | 2.3   | 3.1   |
| <b>M12geo</b>        | 3,595,401           | 113241                                  | 46924   | 109302   | 115947   | 192108   | 577522                  | 3596   | 3452   | 4446   | 2839   | 1665                              | 3.3             | 3.5   | 1.4   | 3.1  | 3.0                              | 5.1   | 3.3   | 1.7   | 1.2   | 1.7   | 1.3   |
| <b>M13tol</b>        | 2,678,925           | 110469                                  | 15782   | 143001   | 215874   | 132284   | 617990                  | 65699  | 8289   | 67521  | 57344  | 5215                              | 4.4             | 4.3   | 0.6   | 5.1  | 7.0                              | 4.4   | 4.4   | 39.3  | 3.6   | 32.3  | 31.8  |
| <b>M14spi</b>        | 2,831,517           | 104169                                  | 73087   | 96664    | 84788    | 60673    | 419381                  | 1561   | 1910   | 2128   | 1441   | 1048                              | 2.8             | 0.9   | 0.8   | 1.0  | 0.8                              | 2.0   | 0.7   | 0.8   | 0.8   | 0.8   | 2.9   |
| <b>M15fir</b>        | 3,849,516           | 76982                                   | 87761   | 84601    | 70247    | 64893    | 384484                  | 5941   | 14740  | 11237  | 6383   | 2865                              | 1.8             | 2.4   | 4.3   | 3.6  | 2.4                              | 3.8   | 2.2   | 2.4   | 3.4   | 3.3   | 2.8   |
| <b>M17geo</b>        | 3,876,561           | 68108                                   | 44891   | 83564    | 30065    | 101087   | 327715                  | 612    | 813    | 657    | 117    | 902                               | 1.5             | 0.2   | 0.2   | 0.2  | 0.0                              | 1.2   | 0.2   | 0.3   | 0.2   | 0.1   | 0.8   |
| <b>M18tol</b>        | 1,822,401           | 11260                                   | 3362    | 14238    | 18395    | 38024    | 86279                   | 1947   | 690    | 3307   | 1848   | 788                               | 0.9             | 0.6   | 0.2   | 0.7  | 0.9                              | 1.6   | 0.9   | 1.6   | 0.4   | 2.2   | 1.4   |
| <b>M19bac</b>        | 3,322,566           | 33905                                   | 26038   | 35872    | 46456    | 374222   | 179693                  | 1599   | 2437   | 2460   | 3040   | 1782                              | 1.0             | 0.7   | 0.8   | 0.9  | 1.3                              | 2.7   | 0.7   | 1.0   | 0.9   | 1.1   | 2.8   |
| <b>M20fir</b>        | 761,991             | 10171                                   | 3790    | 6895     | 12010    | 5544     | 38410                   | 847    | 638    | 1332   | 1141   | 236                               | 1.0             | 1.8   | 1.0   | 2.2  | 2.2                              | 1.6   | 1.2   | 1.8   | 2.5   | 1.5   | 2.4   |
| <b>M21unc</b>        | 2,390,274           | 18787                                   | 14052   | 31676    | 23037    | 31707    | 119259                  | 131    | 139    | 208    | 291    | 205                               | 0.9             | 0.8   | 0.6   | 1.2  | 0.8                              | 1.2   | 0.9   | 0.1   | 0.1   | 0.2   | 0.4   |
| <b>M5firP</b>        | 56,427              | 4590                                    | 5073    | 6115     | 7412     | 79696    | 31159                   | 24     | 54     | 47     | 15     | 4                                 | 10.8            | 8.7   | 9.6   | 10.6 | 11.7                             | 12.9  | 10.8  | 0.7   | 1.1   | 1.1   | 0.4   |
| <b>M16actB</b>       | 1,150,047           | 42084                                   | 52264   | 48881    | 35797    | 42096    | 221222                  | 1016   | 3005   | 3890   | 940    | 748                               | 3.5             | 1.3   | 2.9   | 4.1  | 1.1                              | 3.3   | 1.3   | 2.2   | 3.7   | 1.6   | 3.7   |
| Reads to metagenome  | 8686268             | 8727062                                 | 9535095 | 10423552 | 10199776 | 47571743 | 566246                  | 781360 | 707397 | 610414 | 171319 | 385                               | SUM of RPKMs:   | 352   | 356   | 331  | 357                              | 337   | 397   | 371   | 342   | 296   | 361   |
| Reads to bin-genomes | 8377820             | 8410880                                 | 9151926 | 10061889 | 9717005  | 45719520 | 547570                  | 751779 | 676600 | 562612 | 159281 | 93                                | % in bin-genome | 96    | 96    | 96   | 97                               | 95    | 96    | 96    | 96    | 95    | 93    |

<sup>a</sup> Raw reads for each condition of both metagenomic DNA and metatranscriptomic mRNA were separately mapped to SP-H ORFs by using similarity cut-off by 0.95 and length cut-off by 0.7.  
<sup>b</sup> RPKM values, Reads Per Kilo-base per Million mapped reads, for both DNA and mRNA samples under five different operational conditions were calculated based on total bases of ORFs in each bin-genome.  
<sup>c</sup> mRNA-RPKM values were normalized by DNA existence fluctuation among five conditions based on DNA-RPKM of each condition divided by DNA-RPKM of total reads.

Supplementary Table S16. Summary of mRNA and DNA read counts and RPKM calculation for SP-L bin-genomes.

| Bin-genome ID        | Total bases of ORFs | Mapped reads count to ORFs <sup>a</sup> |           |           |           |            |            |                         |          |          |               |        | DNA-RPKM <sup>b</sup>             |      |       |      |      |      | mRNA-RPKM <sup>b</sup>           |       |       |       |      |       |       |       |       |      |     |     |     |     |
|----------------------|---------------------|-----------------------------------------|-----------|-----------|-----------|------------|------------|-------------------------|----------|----------|---------------|--------|-----------------------------------|------|-------|------|------|------|----------------------------------|-------|-------|-------|------|-------|-------|-------|-------|------|-----|-----|-----|-----|
|                      |                     | metagenomic DNA                         |           |           |           |            |            | metatranscriptomic mRNA |          |          |               |        | before normalization <sup>b</sup> |      |       |      |      |      | after normalization <sup>c</sup> |       |       |       |      |       |       |       |       |      |     |     |     |     |
|                      |                     | C01                                     | C02       | C03       | C04       | C05        | Total      | C01                     | C02      | C03      | C04           | C05    | Total                             | C01  | C02   | C03  | C04  | C05  | C01                              | C02   | C03   | C04   | C05  |       |       |       |       |      |     |     |     |     |
| L1go                 | 3,966,585           | 493,4372                                | 318,4858  | 189,7243  | 201,1668  | 209,0780   | 1,411,8921 | 51,147                  | 2,4408   | 1,1029   | 5,083         | 2,0852 | 113.2                             | 70.7 | 42.9  | 49.6 | 53.6 | 66.5 | 17.8                             | 13.5  | 6.2   | 3.2   | 28.2 | 7.5   | 12.6  | 11.2  | 4.9   | 41.3 |     |     |     |     |
| L2tol                | 3,088,263           | 1,755,692                               | 3,011,278 | 3,449,156 | 2,683,542 | 2,228,128  | 31,277,96  | 32,2728                 | 2,28650  | 1,90504  | 15,3323       | 37,304 | 52.4                              | 87.0 | 101.4 | 86.1 | 74.3 | 80.4 | 146.1                            | 165.1 | 138.7 | 124.7 | 65.6 | 160.6 | 151.5 | 128.2 | 133.1 | 83.9 |     |     |     |     |
| L3tol                | 3,153,606           | 5,73206                                 | 5,835,695 | 9,02873   | 8,265,99  | 6,723,00   | 35,956,63  | 12,8006                 | 6,7463   | 81,976   | 7,6414        | 40,25  | 16.8                              | 16.5 | 26.0  | 26.0 | 22.0 | 21.4 | 56.9                             | 47.8  | 58.5  | 61.0  | 6.9  | 51.9  | 61.3  | 56.0  | 57.2  | 8.0  |     |     |     |     |
| L4bac                | 3,096,891           | 2,448,52                                | 3,937,96  | 4,845,50  | 4,976,11  | 4,393,23   | 20,601,32  | 6,804                   | 6,221    | 7,782    | 7,369         | 5,539  | 7.3                               | 11.4 | 14.3  | 16.0 | 14.7 | 12.7 | 3.1                              | 4.5   | 5.7   | 6.0   | 9.8  | 3.8   | 5.0   | 5.9   | 5.4   | 10.0 |     |     |     |     |
| L5met                | 1,306,779           | 891,88                                  | 1,733,49  | 2,604,46  | 1,263,98  | 837,50     | 7,331,31   | 33,317                  | 2,2263   | 3,6820   | 18,431        | 8,869  | 6.2                               | 11.7 | 17.8  | 9.4  | 6.5  | 10.4 | 35.1                             | 37.4  | 62.4  | 34.9  | 36.4 | 42.4  | 33.3  | 42.6  | 44.1  | 69.1 |     |     |     |     |
| L6fir                | 1,042,185           | 1,443,70                                | 8,2815    | 11,2191   | 12,4563   | 16,3396    | 62,7335    | 68,39                   | 3,714    | 6,208    | 29,17         | 4,769  | 13.1                              | 7.3  | 10.0  | 12.2 | 16.6 | 11.7 | 9.4                              | 8.2   | 13.8  | 7.2   | 25.5 | 6.0   | 13.0  | 18.7  | 7.9   | 21.3 |     |     |     |     |
| L7ppro               | 3,352,092           | 1,261,31                                | 3,325,62  | 3,779,05  | 3,898,01  | 3,910,44   | 16,174,43  | 10,729                  | 7,973    | 12,256   | 14,238        | 10,410 | 3.4                               | 8.6  | 9.9   | 11.1 | 11.6 | 8.8  | 4.3                              | 5.1   | 8.0   | 10.3  | 16.3 | 8.2   | 5.3   | 8.3   | 9.3   | 14.7 |     |     |     |     |
| L8spi                | 2,677,965           | 2,445,39                                | 2,350,19  | 2,403,31  | 1,666,96  | 15,285,58  | 10,394,43  | 7,360                   | 1,376    | 1,050    | 2,871         | 4,343  | 8.7                               | 8.1  | 8.5   | 6.4  | 6.1  | 7.6  | 4.0                              | 1.2   | 0.9   | 2.8   | 9.2  | 2.5   | 1.1   | 1.0   | 3.8   | 13.5 |     |     |     |     |
| L9bac                | 3,521,796           | 2,675,75                                | 2,954,63  | 3,172,82  | 2,109,56  | 19,381,4   | 12,850,90  | 4,942                   | 2,866    | 3,204    | 2,338         | 4,614  | 6.9                               | 7.3  | 8.0   | 5.8  | 5.6  | 6.0  | 1.9                              | 1.8   | 2.0   | 1.6   | 7.0  | 1.4   | 1.6   | 2.0   | 2.2   | 10.0 |     |     |     |     |
| L10met               | 3,170,025           | 6,6556                                  | 3,491,30  | 2,497,06  | 1,246,71  | 4,3982     | 8,331,45   | 359                     | 978      | 567      | 404           | 1,27   | 1.9                               | 9.8  | 7.1   | 3.9  | 1.4  | 5.0  | 0.2                              | 0.7   | 0.4   | 0.3   | 0.2  | 0.3   | 0.3   | 0.3   | 0.5   | 0.9  |     |     |     |     |
| L11unc               | 4,100,073           | 2,234,00                                | 3,385,28  | 3,156,55  | 2,930,63  | 2,327,06   | 14,033,52  | 484                     | 1,91     | 248      | 595           | 7,26   | 5.0                               | 7.4  | 7.0   | 7.1  | 5.9  | 6.5  | 0.2                              | 0.1   | 0.1   | 0.4   | 1.0  | 0.2   | 0.1   | 0.1   | 0.4   | 1.3  |     |     |     |     |
| L12lac               | 1,700,727           | 2,663,8                                 | 4,647,7   | 6,7082    | 2,401,22  | 2,879,60   | 6,682,79   | 7,207                   | 7,256    | 8,846    | 2,5950        | 1,221  | 1.4                               | 2.3  | 3.5   | 13.5 | 16.8 | 7.2  | 5.7                              | 9.2   | 11.3  | 36.9  | 3.8  | 21.1  | 27.8  | 27.3  | 22.4  | 1.9  |     |     |     |     |
| L13fir               | 3,061,467           | 5,658,7                                 | 8,991,7   | 9,7884    | 13,3815   | 24,7257    | 62,7460    | 8,928                   | 3,782    | 5,076    | 11,176        | 24,565 | 1.7                               | 2.6  | 2.9   | 4.3  | 8.2  | 3.8  | 4.0                              | 2.7   | 3.7   | 9.0   | 42.9 | 6.3   | 4.0   | 5.7   | 9.2   | 23.6 |     |     |     |     |
| L14bac               | 3,572,166           | 8,2801                                  | 11,5863   | 14,1763   | 15,054,9  | 19,128,9   | 66,2265    | 2,422                   | 1,521    | 1,957    | 1,942         | 2,543  | 2.2                               | 2.9  | 3.6   | 4.2  | 5.6  | 3.6  | 1.0                              | 1.0   | 1.2   | 1.4   | 3.9  | 1.2   | 1.2   | 1.5   | 1.4   | 3.0  |     |     |     |     |
| L15bac               | 2,817,237           | 5,1598                                  | 5,0751    | 5,324,7   | 12,699,7  | 11,698,3   | 3,995,76   | 1,395                   | 1,232    | 1,404    | 2,583         | 1,565  | 1.7                               | 1.6  | 1.7   | 4.4  | 4.3  | 2.7  | 0.7                              | 1.0   | 1.1   | 2.3   | 3.0  | 0.8   | 1.6   | 2.0   | 1.6   | 2.2  |     |     |     |     |
| L22fir               | 2,151,693           | 5,3742                                  | 5,9901    | 7,5428    | 11,107,7  | 15,420,1   | 45,434,9   | 6,463                   | 3,237    | 4,227    | 4,318         | 2,311  | 2.3                               | 2.5  | 3.2   | 5.1  | 7.4  | 4.0  | 4.2                              | 3.3   | 4.4   | 5.0   | 5.8  | 5.2   | 5.3   | 6.4   | 4.5   | 3.7  |     |     |     |     |
| L16bac               | 3,438,726           | 3,5580                                  | 6,5456    | 7,6963    | 7,3117    | 5,987,3    | 30,698,9   | 10,57                   | 9,44     | 1,385    | 15,339        | 1,662  | 0.9                               | 1.6  | 2.0   | 2.0  | 1.6  | 1.6  | 0.4                              | 0.6   | 0.9   | 1.1   | 2.5  | 0.5   | 0.6   | 0.8   | 1.0   | 3.0  |     |     |     |     |
| L17bac               | 3,426,279           | 6,3259                                  | 2,2797    | 3,7483    | 6,3594    | 14,783,6   | 33,496,9   | 8,26                    | 2,84     | 4,51     | 10,60         | 1,905  | 1.7                               | 0.6  | 1.0   | 1.8  | 4.4  | 1.8  | 0.3                              | 0.2   | 0.3   | 0.8   | 3.0  | 0.3   | 0.6   | 0.6   | 0.9   | 1.5  |     |     |     |     |
| L18ver               | 5,758,203           | 14,1867                                 | 10,7469   | 16,4518   | 7,9496    | 14,506,1   | 63,841,1   | 5,777                   | 14,93    | 1,779    | 9,26          | 12,85  | 2.2                               | 1.6  | 2.5   | 1.3  | 2.5  | 2.0  | 1.4                              | 0.6   | 0.7   | 0.4   | 1.2  | 0.9   | 0.7   | 0.6   | 0.7   | 1.1  |     |     |     |     |
| L19bac               | 3,062,352           | 2,3772                                  | 4,2566    | 4,154,9   | 3,7520    | 3,143,4    | 17,684,1   | 248                     | 1,97     | 2,81     | 3,02          | 3,27   | 0.7                               | 1.3  | 1.2   | 1.2  | 1.1  | 1.1  | 0.1                              | 0.1   | 0.2   | 0.3   | 0.6  | 0.1   | 0.1   | 0.2   | 0.3   | 0.7  |     |     |     |     |
| L20tol               | 1,166,886           | 4,2711                                  | 1,9450    | 1,9810    | 1,3994    | 3,979,00   | 13,575,5   | 3,931                   | 8,78     | 8,28     | 308           | 309    | 2.8                               | 1.2  | 1.3   | 1.0  | 2.9  | 1.8  | 3.9                              | 1.4   | 1.3   | 0.6   | 1.2  | 1.8   | 2.1   | 2.2   | 1.2   | 0.9  |     |     |     |     |
| L20toB               | 823,299             | 23,154                                  | 8,234     | 8,877     | 10,354    | 2,255,4    | 7,317,3    | 1,720                   | 419      | 307      | 248           | 2,21   | 2.2                               | 0.8  | 0.8   | 1.1  | 2.4  | 1.4  | 2.5                              | 1.0   | 0.7   | 0.6   | 1.2  | 1.2   | 1.8   | 1.4   | 1.0   | 0.9  |     |     |     |     |
| L21met               | 894,954             | 14,477                                  | 25,501    | 3,7603    | 1,6935    | 12,150     | 10,666,6   | 2,641                   | 1,890    | 3,018    | 1,368         | 7,66   | 1.5                               | 2.5  | 3.8   | 1.8  | 1.4  | 2.2  | 4.1                              | 4.6   | 7.5   | 3.8   | 4.6  | 4.4   | 4.1   | 5.1   | 5.2   | 8.7  |     |     |     |     |
| L23elu               | 1,276,272           | 2,6948                                  | 1,3654    | 1,782,7   | 4,647,3   | 4,056,8    | 14,547,0   | 8,53                    | 3,44     | 546      | 14,53         | 10,55  | 2.0                               | 1.0  | 1.3   | 3.6  | 3.3  | 2.2  | 0.9                              | 0.6   | 1.0   | 2.9   | 4.5  | 0.7   | 1.4   | 1.9   | 2.0   | 3.5  |     |     |     |     |
| L24fir               | 1,631,334           | 2,451,3                                 | 14,786    | 1,943,7   | 1,3550    | 2,1784     | 9,407,0    | 7,85                    | 1,41     | 1,75     | 4,50          | 7,39   | 1.4                               | 0.8  | 1.1   | 0.8  | 1.4  | 1.1  | 0.7                              | 0.2   | 0.2   | 0.7   | 2.5  | 0.4   | 0.3   | 0.3   | 1.1   | 2.3  |     |     |     |     |
| L12lacP              | 212,073             | 1,284                                   | 2,735     | 3,237     | 1,752     | 1,1851     | 30,839     | 108                     | 116      | 155      | 420           | 21     | 0.5                               | 1.1  | 1.3   | 5.2  | 5.4  | 2.6  | 0.7                              | 1.1   | 1.5   | 4.7   | 0.5  | 2.4   | 2.7   | 3.6   | 2.7   | 0.3  |     |     |     |     |
| Reads to metagenome  | 9,945,047           | 10,713,82                               | 9,997,513 | 9,161,502 | 8,800,887 | 17,994,261 | 64,902,0   | 407,156                 | 403,655  | 361,385  | 1,671,51      |        |                                   |      |       |      |      |      |                                  |       |       |       |      |       |       |       |       |      |     |     |     |     |
| Reads to bin-genomes | 9,339,982           | 9,665,940                               | 9,470,046 | 8,584,913 | 8,216,672 | 46,279,463 | 61,707,6   | 3,898,47                | 3,820,79 | 3,380,16 | 14,203,3      |        |                                   |      |       |      |      |      |                                  |       |       |       |      |       |       |       |       |      |     |     |     |     |
| % in bin-genome      | 95                  | 95                                      | 95        | 94        | 93        | 94         | 94         | 95                      | 96       | 95       | 94            | 85     |                                   |      |       |      |      |      |                                  |       |       |       |      |       |       |       |       |      |     |     |     |     |
|                      |                     |                                         |           |           |           |            |            |                         |          |          | SUM of RPKMs: |        |                                   |      |       |      |      |      |                                  |       |       | 277   | 310  | 313   | 333   | 323   | 287   | 332  | 339 | 334 | 324 | 331 |

<sup>a</sup>Raw reads for each condition of both metagenomic DNA and metatranscriptomic mRNA were separately mapped to SP-H ORFs by using similarity cut-off by 0.95 and length cut-off by 0.7.  
<sup>b</sup>RPKM values, Reads Per Kilo-base per Million mapped reads, for both DNA and mRNA samples under five different operational conditions were calculated based on total bases of ORFs in each bin-genome.  
<sup>c</sup>mRNA-RPKM values were normalized by DNA existence fluctuation among five conditions based on DNA-RPKM of each condition divided by DNA-RPKM of total reads.

Supplementary Table S17. Top 30 highly down regulated CDSs responded to AcPro stimulus for fermentation-associated OCSs.

| Bin-genom ID     | Contig ID     | ORF begin | ORF end | Expression dynamics (SP/AcPro) | KO    | KO description<br>[Yellow highlight: Fermentation-related metabolic genes]<br>[Blue letter: Ribosomal proteins] | Gene expression level (mRNA <sub>RPKM</sub> ) |          |                          |                         |            |     | Ave DNA <sub>RPKM</sub> |
|------------------|---------------|-----------|---------|--------------------------------|-------|-----------------------------------------------------------------------------------------------------------------|-----------------------------------------------|----------|--------------------------|-------------------------|------------|-----|-------------------------|
|                  |               |           |         |                                |       |                                                                                                                 | Con1 SP                                       | Con2 SP+ | Con3 OC <sub>short</sub> | Con4 OC <sub>long</sub> | Con5 AcPro |     |                         |
| <b>OCS L2tol</b> |               |           |         |                                |       |                                                                                                                 |                                               |          |                          |                         |            |     |                         |
| L2tol            | L_contig_8    | 231584    | 232117  | -                              | 56.6  | K01507 ppa; inorganic pyrophosphatase [EC:3.6.1.1]                                                              | 812                                           | 798      | 360                      | 730                     | 14         | 103 |                         |
| L2tol            | L_contig_6    | 279736    | 280968  | -                              | 53.5  | K00058 serA, PHGDH; D-3-phosphoglycerate dehydrogenase                                                          | 665                                           | 479      | 280                      | 400                     | 12         | 76  |                         |
| L2tol            | L_contig_6    | 262278    | 263405  | +                              | 49.2  | K10112 msmX, msmK, malK, sugC, ggtA, msik; multiple sugar transport system ATP-binding protein                  | 1001                                          | 650      | 538                      | 688                     | 20         | 74  |                         |
| L2tol            | L_contig_6    | 258847    | 260112  | +                              | 41.8  | K02027 ABC.MS.S; multiple sugar transport system substrate-binding protein                                      | 2780                                          | 1931     | 1686                     | 2022                    | 67         | 76  |                         |
| L2tol            | L_contig_100  | 21403     | 22731   | -                              | 41.5  | K01940 argG; argininosuccinate synthase [EC:6.3.4.5]                                                            | 478                                           | 287      | 190                      | 251                     | 12         | 73  |                         |
| L2tol            | L_contig_12   | 257148    | 257378  | -                              | 40.6  | K02963 RP-S18, MRPS18, rpsR; small subunit ribosomal protein S18                                                | 4039                                          | 2645     | 1537                     | 3388                    | 99         | 89  |                         |
| L2tol            | L_contig_6    | 244524    | 2461294 | +                              | 40.4  | K02025 ABC.MS.P; multiple sugar transport system permease protein                                               | 1105                                          | 683      | 567                      | 786                     | 27         | 79  |                         |
| L2tol            | L_contig_10   | 99521     | 99913   | +                              | 39.9  | K02994 RP-S8, rpsH; small subunit ribosomal protein S8                                                          | 6213                                          | 3167     | 2395                     | 4358                    | 156        | 130 |                         |
| L2tol            | L_contig_100  | 2237      | 3427    | +                              | 38.6  | K00813 aspC; aspartate aminotransferase [EC:2.6.1.1]                                                            | 496                                           | 547      | 313                      | 305                     | 13         | 76  |                         |
| L2tol            | L_contig_12   | 257405    | 257782  | -                              | 38.3  | K02990 RP-S6, MRPS6, rpsF; small subunit ribosomal protein S6                                                   | 2325                                          | 1127     | 848                      | 1773                    | 61         | 95  |                         |
| L2tol            | L_contig_13   | 244524    | 246005  | -                              | 37.7  | K01212 sacC; levansucrase [EC:3.2.1.65]                                                                         | 390                                           | 262      | 238                      | 253                     | 10         | 80  |                         |
| L2tol            | L_contig_443  | 14817     | 15455   | -                              | 37.6  | K10914 crp; CRP/FNR family transcriptional regulator, cyclic AMP receptor protein                               | 451                                           | 378      | 240                      | 416                     | 12         | 98  |                         |
| L2tol            | L_contig_8    | 123529    | 124977  | -                              | 37.5  | K00703 glgA; starch synthase [EC:2.4.1.21]                                                                      | 396                                           | 352      | 199                      | 324                     | 11         | 102 |                         |
| L2tol            | L_contig_12   | 256658    | 257107  | -                              | 36.9  | K02939 RP-L9, MRPL9, rplI; large subunit ribosomal protein L9                                                   | 1885                                          | 1203     | 595                      | 1299                    | 51         | 91  |                         |
| L2tol            | L_contig_6    | 263426    | 265357  | +                              | 35.9  | K05343 treS; maltose alpha-D-glucosyltransferase/ alpha-amylase                                                 | 1139                                          | 636      | 492                      | 741                     | 32         | 78  |                         |
| L2tol            | L_contig_33   | 175500    | 176975  | +                              | 34.9  | K00873 PK, pyk; pyruvate kinase [EC:2.7.1.40]                                                                   | 2354                                          | 1383     | 832                      | 1695                    | 67         | 106 |                         |
| L2tol            | L_contig_10   | 99193     | 99498   | +                              | 33.3  | K02954 RP-S14, MRPS14, rpsN; small subunit ribosomal protein S14                                                | 6674                                          | 3375     | 2440                     | 4487                    | 200        | 124 |                         |
| L2tol            | L_contig_147  | 87879     | 89093   | +                              | 33.1  | K00647 fabB; 3-oxoacyl-[acyl-carrier-protein] synthase I [EC:2.3.1.41]                                          | 626                                           | 343      | 254                      | 447                     | 19         | 76  |                         |
| L2tol            | L_contig_13   | 226253    | 226813  | -                              | 32.7  | -                                                                                                               | 447                                           | 394      | 278                      | 321                     | 14         | 84  |                         |
| L2tol            | L_contig_34   | 173623    | 174549  | -                              | 32.5  | K00847 scrK; fructokinase [EC:2.7.1.4]                                                                          | 537                                           | 399      | 311                      | 411                     | 17         | 79  |                         |
| L2tol            | L_contig_1438 | 949       | 1452    | -                              | 30.7  | K02864 RP-L10, MRPL10, rplJ; large subunit ribosomal protein L10                                                | 7929                                          | 3297     | 2890                     | 5349                    | 258        | 131 |                         |
| L2tol            | L_contig_8    | 42332     | 43327   | -                              | 30.7  | K00134 GAPDH, gapA; glyceraldehyde 3-phosphate dehydrogenase                                                    | 10143                                         | 6667     | 3957                     | 7112                    | 331        | 106 |                         |
| L2tol            | L_contig_13   | 110858    | 111196  | -                              | 29.2  | K03210 yajC; preprotein translocase subunit YajC                                                                | 659                                           | 472      | 318                      | 418                     | 23         | 81  |                         |
| L2tol            | L_contig_10   | 90123     | 91034   | +                              | 29.0  | K00611 OTC, argF, argI; ornithine carbamoyltransferase [EC:2.1.3.3]                                             | 486                                           | 410      | 229                      | 311                     | 17         | 100 |                         |
| L2tol            | L_contig_34   | 53736     | 54860   | +                              | 28.9  | K00133 asd; aspartate-semialdehyde dehydrogenase [EC:1.2.1.11]                                                  | 590                                           | 369      | 208                      | 304                     | 20         | 91  |                         |
| L2tol            | L_contig_147  | 47932     | 48543   | -                              | 28.8  | K11755 hisI; phosphoribosyl-ATP pyrophosphohydrolase / phosphoribosyl-AMP cyclohydrolase                        | 360                                           | 346      | 195                      | 217                     | 13         | 71  |                         |
| L2tol            | L_contig_33   | 52759     | 54270   | +                              | 27.2  | -                                                                                                               | 276                                           | 301      | 158                      | 176                     | 10         | 92  |                         |
| L2tol            | L_contig_34   | 22102     | 22728   | +                              | 27.2  | K03775 slyD; FKBP-type peptidyl-prolyl cis-trans isomerase SlyD [EC:5.2.1.8]                                    | 332                                           | 176      | 124                      | 297                     | 12         | 86  |                         |
| L2tol            | L_contig_33   | 20661     | 22076   | +                              | 26.9  | K01193 sacA; beta-fructofuranosidase [EC:3.2.1.26]                                                              | 727                                           | 640      | 429                      | 505                     | 27         | 85  |                         |
| L2tol            | L_contig_6    | 30191     | 30736   | +                              | 26.8  | K03607 proQ; ProP effector                                                                                      | 375                                           | 285      | 164                      | 184                     | 14         | 82  |                         |
| L2tol            | L_contig_12   | 286878    | 287348  | -                              | 25.9  | K00794 ribH, RIB4; 6,7-dimethyl-8-ribityllumazine synthase [EC:2.5.1.78]                                        | 421                                           | 407      | 214                      | 288                     | 16         | 88  |                         |
| L2tol            | L_contig_6    | 195325    | 197325  | +                              | 25.7  | K00615 tktA, tktB; transketolase [EC:2.2.1.1]                                                                   | 394                                           | 290      | 176                      | 286                     | 15         | 76  |                         |
| <b>OCS L3tol</b> |               |           |         |                                |       |                                                                                                                 |                                               |          |                          |                         |            |     |                         |
| L3tol            | L_contig_427  | 111       | 467     | -                              | 128.6 | K02952 RP-S13, rpsM; small subunit ribosomal protein S13                                                        | 2477                                          | 1652     | 1455                     | 2708                    | 19         | 29  |                         |
| L3tol            | L_contig_427  | 2090      | 2524    | -                              | 126.3 | K02876 RP-L15, MRPL15, rplO; large subunit ribosomal protein L15                                                | 1997                                          | 1334     | 1254                     | 2103                    | 16         | 26  |                         |
| L3tol            | L_contig_228  | 15732     | 16103   | +                              | 116.5 | K02888 RP-L21, MRPL21, rplU; large subunit ribosomal protein L21                                                | 2154                                          | 1560     | 975                      | 2173                    | 18         | 39  |                         |
| L3tol            | L_contig_310  | 3963      | 4337    | -                              | 96.9  | K02950 RP-S12, MRPS12, rpsL; small subunit ribosomal protein S12                                                | 1777                                          | 908      | 1006                     | 1823                    | 18         | 33  |                         |
| L3tol            | L_contig_101  | 2         | 649     | -                              | 74.2  | K00873 PK, pyk; pyruvate kinase [EC:2.7.1.40]                                                                   | 788                                           | 613      | 417                      | 658                     | 11         | 27  |                         |
| L3tol            | L_contig_9    | 10029     | 10259   | -                              | 63.8  | K02963 RP-S18, MRPS18, rpsR; small subunit ribosomal protein S18                                                | 1899                                          | 1133     | 1078                     | 1924                    | 30         | 27  |                         |
| L3tol            | L_contig_400  | 640       | 1026    | +                              | 49.5  | K02879 RP-L17, MRPL17, rplQ; large subunit ribosomal protein L17                                                | 879                                           | 611      | 815                      | 846                     | 18         | 30  |                         |
| L3tol            | L_contig_337  | 12708     | 14018   | -                              | 47.7  | K03545 tig; trigger factor                                                                                      | 501                                           | 356      | 255                      | 500                     | 10         | 23  |                         |
| L3tol            | L_contig_427  | 2718      | 3218    | -                              | 45.0  | K02988 RP-S5, MRPS5, rpsE; small subunit ribosomal protein S5                                                   | 1855                                          | 1076     | 1108                     | 2184                    | 41         | 27  |                         |
| L3tol            | L_contig_192  | 33762     | 34055   | -                              | 41.9  | K04078 groES, HSPE1; chaperonin GroES                                                                           | 980                                           | 493      | 573                      | 822                     | 23         | 29  |                         |
| L3tol            | L_contig_310  | 1225      | 3327    | -                              | 38.9  | K02355 fusA, GFM, EFG; elongation factor G                                                                      | 1400                                          | 751      | 691                      | 1070                    | 36         | 29  |                         |
| L3tol            | L_contig_123  | 12259     | 13302   | +                              | 37.8  | -                                                                                                               | 1993                                          | 2468     | 3441                     | 2235                    | 53         | 24  |                         |
| L3tol            | L_contig_427  | 2528      | 2710    | -                              | 37.2  | K02907 RP-L30, MRPL30, rpmD; large subunit ribosomal protein L30                                                | 1398                                          | 827      | 855                      | 1818                    | 38         | 22  |                         |
| L3tol            | L_contig_123  | 1         | 369     | +                              | 36.4  | K00873 PK, pyk; pyruvate kinase [EC:2.7.1.40]                                                                   | 678                                           | 684      | 411                      | 739                     | 19         | 27  |                         |
| L3tol            | L_contig_2    | 305808    | 306035  | -                              | 34.1  | K02110 ATPF0C, atpE; F-type H <sup>+</sup> -transporting ATPase subunit c                                       | 1030                                          | 1231     | 926                      | 1014                    | 30         | 30  |                         |
| L3tol            | L_contig_41   | 88000     | 88887   | -                              | 32.5  | K02357 tsf, TSMF; elongation factor Ts                                                                          | 1007                                          | 629      | 539                      | 1051                    | 31         | 25  |                         |
| L3tol            | L_contig_301  | 119665    | 120930  | -                              | 32.1  | K02027 ABC.MS.S; multiple sugar transport system substrate-binding protein                                      | 873                                           | 1303     | 1441                     | 1074                    | 27         | 20  |                         |
| L3tol            | L_contig_2    | 306079    | 306858  | -                              | 31.8  | K02108 ATPF0A, atpB; F-type H <sup>+</sup> -transporting ATPase subunit a                                       | 561                                           | 627      | 529                      | 493                     | 18         | 31  |                         |
| L3tol            | L_contig_123  | 186786    | 188195  | +                              | 31.3  | K01915 glnA; glutamine synthetase [EC:6.3.1.2]                                                                  | 1223                                          | 1145     | 991                      | 1148                    | 39         | 30  |                         |
| L3tol            | L_contig_427  | 751       | 2082    | -                              | 30.1  | K03076 secY; preprotein translocase subunit SecY                                                                | 1554                                          | 912      | 1001                     | 1666                    | 52         | 30  |                         |
| L3tol            | L_contig_81   | 22973     | 24343   | +                              | 29.8  | K02809 PTS-Scr-EIIB, scrA; PTS system, sucrose-specific IIB component                                           | 896                                           | 929      | 1136                     | 1118                    | 30         | 22  |                         |
| L3tol            | L_contig_9    | 211050    | 212045  | +                              | 27.2  | K00134 GAPDH, gapA; glyceraldehyde 3-phosphate dehydrogenase                                                    | 3574                                          | 3217     | 2381                     | 3765                    | 131        | 30  |                         |
| L3tol            | L_contig_310  | 3         | 1160    | -                              | 26.8  | K02358 tuf, TUFM; elongation factor Tu                                                                          | 2710                                          | 2084     | 2027                     | 2955                    | 101        | 56  |                         |
| L3tol            | L_contig_400  | 3         | 596     | +                              | 26.4  | K03040 rpoA; DNA-directed RNA polymerase subunit alpha [EC:2.7.7.6]                                             | 1529                                          | 940      | 914                      | 1540                    | 58         | 27  |                         |
| L3tol            | L_contig_2    | 56400     | 57071   | -                              | 26.0  | -                                                                                                               | 266                                           | 375      | 459                      | 336                     | 10         | 31  |                         |
| L3tol            | L_contig_310  | 3409      | 3879    | -                              | 25.3  | K02992 RP-S7, MRPS7, rpsG; small subunit ribosomal protein S7                                                   | 1851                                          | 884      | 901                      | 1738                    | 73         | 29  |                         |
| L3tol            | L_contig_427  | 3233      | 3484    | -                              | 25.1  | K02881 RP-L18, MRPL18, rplR; large subunit ribosomal protein L18                                                | 1373                                          | 864      | 894                      | 1299                    | 55         | 27  |                         |
| L3tol            | L_contig_29   | 16569     | 18236   | +                              | 24.9  | K01953 asnB, ASNS; asparagine synthase (glutamine-hydrolyzing)                                                  | 309                                           | 265      | 185                      | 274                     | 12         | 26  |                         |
| L3tol            | L_contig_406  | 37451     | 38017   | +                              | 24.5  | K02945 RP-S1, rpsA; small subunit ribosomal protein S1                                                          | 1188                                          | 801      | 736                      | 1242                    | 49         | 17  |                         |
| L3tol            | L_contig_107  | 128359    | 129273  | -                              | 24.3  | K02406 fliC; flagellin                                                                                          | 549                                           | 793      | 863                      | 523                     | 23         | 22  |                         |

Supplementary Table S17. *Continued*

| Bin-genom ID                  | Contig ID     | ORF begin | ORF end | Expression dynamics (SP/ACPro) | KO    | KO description<br>[Yellow highlight: Fermentation-related metabolic genes]<br>[Blue letter: Ribosomal proteins] | Gene expression level (mRNA <sub>RPKM</sub> ) |          |                          |                         |            |    |  | Ave DNA <sub>RPKM</sub> |
|-------------------------------|---------------|-----------|---------|--------------------------------|-------|-----------------------------------------------------------------------------------------------------------------|-----------------------------------------------|----------|--------------------------|-------------------------|------------|----|--|-------------------------|
|                               |               |           |         |                                |       |                                                                                                                 | Con1 SP                                       | Con2 SP+ | Con3 OC <sub>short</sub> | Con4 OC <sub>long</sub> | Con5 ACPro |    |  |                         |
| <b>OCS M13tol</b>             |               |           |         |                                |       |                                                                                                                 |                                               |          |                          |                         |            |    |  |                         |
| M13tol                        | M_contig_104  | 69476     | 70363   | -                              | 40.0  | K02357 tsf, TSFM; elongation factor Ts                                                                          | 526                                           | 238      | 138                      | 206                     | 13         | 5  |  |                         |
| M13tol                        | M_contig_1871 | 17267     | 17449   | +                              | 32.1  | K02907 <b>RP-L30, MRPL30, rpmD; large subunit ribosomal protein L30</b>                                         | 1024                                          | 201      | 341                      | 494                     | 32         | 5  |  |                         |
| M13tol                        | M_contig_630  | 1427      | 1774    | +                              | 30.5  | K02884 <b>RP-L19, MRPL19, rplS; large subunit ribosomal protein L19</b>                                         | 513                                           | 79       | 95                       | 239                     | 17         | 5  |  |                         |
| M13tol                        | M_contig_178  | 123735    | 124472  | -                              | 25.9  | K01803 <b>TPI, tpiA; triosephosphate isomerase (TIM) [EC:5.3.1.1]</b>                                           | 410                                           | 112      | 99                       | 181                     | 16         | 4  |  |                         |
| M13tol                        | M_contig_1379 | 10062     | 10298   | +                              | 25.6  | K02078 acpP; acyl carrier protein                                                                               | 631                                           | 310      | 217                      | 269                     | 25         | 5  |  |                         |
| M13tol                        | M_contig_1843 | 2837      | 3211    | -                              | 24.4  | K02950 <b>RP-S12, MRPS12, rpsL; small subunit ribosomal protein S12</b>                                         | 759                                           | 172      | 173                      | 394                     | 31         | 5  |  |                         |
| M13tol                        | M_contig_71   | 79566     | 81284   | +                              | 23.8  | K08483 PTS-EI.PTSI, ptsI; phosphotransferase system, enzyme I, PtsI                                             | 404                                           | 112      | 115                      | 142                     | 17         | 6  |  |                         |
| M13tol                        | M_contig_420  | 121563    | 122975  | -                              | 22.5  | K00873 <b>PK, pyk; pyruvate kinase [EC:2.7.1.40]</b>                                                            | 466                                           | 143      | 100                      | 243                     | 21         | 6  |  |                         |
| M13tol                        | M_contig_405  | 9148      | 10311   | -                              | 22.3  | K00927 <b>PGK, pgk; phosphoglycerate kinase [EC:2.7.2.3]</b>                                                    | 670                                           | 308      | 136                      | 281                     | 30         | 5  |  |                         |
| M13tol                        | M_contig_336  | 23791     | 24240   | +                              | 21.3  | K02939 <b>RP-L9, MRPL9, rplI; large subunit ribosomal protein L9</b>                                            | 553                                           | 123      | 120                      | 267                     | 26         | 4  |  |                         |
| M13tol                        | M_contig_630  | 94        | 615     | +                              | 21.0  | K02860 rimM; 16S rRNA processing protein RimM                                                                   | 704                                           | 70       | 173                      | 258                     | 34         | 5  |  |                         |
| M13tol                        | M_contig_1871 | 11480     | 11758   | +                              | 20.6  | K02965 <b>RP-S19, rpsS; small subunit ribosomal protein S19</b>                                                 | 2157                                          | 824      | 403                      | 802                     | 105        | 7  |  |                         |
| M13tol                        | M_contig_2079 | 59673     | 60062   | -                              | 20.1  | K02116 atpI; ATP synthase protein I                                                                             | 300                                           | 165      | 110                      | 103                     | 15         | 6  |  |                         |
| M13tol                        | M_contig_71   | 10759     | 11853   | +                              | 18.4  | K00052 leuB; 3-isopropylmalate dehydrogenase [EC:1.1.1.85]                                                      | 196                                           | 76       | 46                       | 67                      | 11         | 5  |  |                         |
| M13tol                        | M_contig_1871 | 16391     | 16744   | +                              | 17.4  | K02881 <b>RP-L18, MRPL18, rplR; large subunit ribosomal protein L18</b>                                         | 1145                                          | 260      | 228                      | 458                     | 66         | 6  |  |                         |
| M13tol                        | M_contig_2079 | 58885     | 59664   | -                              | 17.1  | K02108 ATPFOA, atpB; F-type H <sup>+</sup> -transporting ATPase subunit a [EC:3.6.3.14]                         | 384                                           | 248      | 163                      | 136                     | 22         | 7  |  |                         |
| M13tol                        | M_contig_1871 | 8725      | 9036    | +                              | 16.9  | K02946 <b>RP-S10, MRPS10, rpsJ; small subunit ribosomal protein S10</b>                                         | 1265                                          | 560      | 322                      | 599                     | 75         | 6  |  |                         |
| M13tol                        | M_contig_976  | 48366     | 50648   | -                              | 16.1  | K00656 <b>pflD; formate C-acetyltransferase [EC:2.3.1.54]</b>                                                   | 867                                           | 528      | 396                      | 243                     | 54         | 5  |  |                         |
| M13tol                        | M_contig_1379 | 10397     | 11620   | +                              | 15.3  | K09458 fabF; 3-oxoacyl[acyl-carrier-protein] synthase II [EC:2.3.1.179]                                         | 219                                           | 68       | 71                       | 79                      | 14         | 4  |  |                         |
| M13tol                        | M_contig_1308 | 26045     | 27040   | -                              | 15.2  | K00134 <b>GAPDH, gapA; glyceraldehyde 3-phosphate dehydrogenase</b>                                             | 1960                                          | 766      | 553                      | 762                     | 129        | 6  |  |                         |
| M13tol                        | M_contig_980  | 78134     | 82768   | -                              | 15.1  | K00265 gltB; glutamate synthase (NADPH/NADH) large chain                                                        | 247                                           | 89       | 78                       | 94                      | 16         | 5  |  |                         |
| M13tol                        | M_contig_1871 | 9059      | 9697    | +                              | 14.5  | K02906 <b>RP-L3, MRPL3, rplC; large subunit ribosomal protein L3</b>                                            | 1328                                          | 374      | 299                      | 556                     | 91         | 7  |  |                         |
| M13tol                        | M_contig_976  | 53744     | 54868   | +                              | 14.3  | K00133 asd; aspartate-semialdehyde dehydrogenase                                                                | 149                                           | 98       | 35                       | 47                      | 10         | 5  |  |                         |
| M13tol                        | M_contig_2302 | 5149      | 5406    | +                              | 14.2  | K02899 <b>RP-L27, MRPL27, rpmA; large subunit ribosomal protein L27</b>                                         | 321                                           | 107      | 142                      | 219                     | 23         | 4  |  |                         |
| M13tol                        | M_contig_1843 | 99        | 2201    | -                              | 13.9  | K02355 fusA, GFM, EFG; elongation factor G                                                                      | 928                                           | 258      | 257                      | 416                     | 67         | 6  |  |                         |
| M13tol                        | M_contig_1843 | 13574     | 13939   | -                              | 13.9  | K02935 <b>RP-L7, MRPL7, rplL; large subunit ribosomal protein L7/L12</b>                                        | 665                                           | 176      | 160                      | 295                     | 48         | 6  |  |                         |
| M13tol                        | M_contig_71   | 11856     | 13253   | +                              | 13.9  | K01703 leuC; 3-isopropylmalate/(R)-2-methylmalate dehydratase large subunit                                     | 174                                           | 92       | 49                       | 69                      | 13         | 5  |  |                         |
| M13tol                        | M_contig_1871 | 13853     | 14221   | +                              | 13.7  | K02874 <b>RP-L14, MRPL14, rplN; large subunit ribosomal protein L14</b>                                         | 1734                                          | 498      | 408                      | 712                     | 127        | 6  |  |                         |
| M13tol                        | M_contig_2302 | 4820      | 5131    | +                              | 13.6  | K02888 <b>RP-L21, MRPL21, rplU; large subunit ribosomal protein L21</b>                                         | 1017                                          | 236      | 271                      | 477                     | 75         | 5  |  |                         |
| M13tol                        | M_contig_2079 | 4266      | 5189    | +                              | 13.6  | K00826 ilvE; branched-chain amino acid aminotransferase [EC:2.6.1.42]                                           | 172                                           | 60       | 32                       | 68                      | 13         | 5  |  |                         |
| <b>OCS H3lac/M2lac/L12lac</b> |               |           |         |                                |       |                                                                                                                 |                                               |          |                          |                         |            |    |  |                         |
| H3lac                         | H_contig_1010 | 24726     | 25034   | -                              | 154.8 | K02946 <b>RP-S10, MRPS10, rpsJ; small subunit ribosomal protein S10</b>                                         | 1370                                          | 467      | 37                       | 1868                    | 11         | 36 |  |                         |
| H3lac                         | H_contig_1010 | 20466     | 20894   | -                              | 146.1 | K02878 <b>RP-L16, MRPL16, rplP; large subunit ribosomal protein L16</b>                                         | 1863                                          | 830      | 118                      | 2347                    | 15         | 38 |  |                         |
| H3lac                         | H_contig_1010 | 20894     | 21547   | -                              | 136.6 | K02982 <b>RP-S3, rpsC; small subunit ribosomal protein S3</b>                                                   | 1428                                          | 593      | 89                       | 1894                    | 12         | 37 |  |                         |
| H3lac                         | H_contig_1010 | 19022     | 19327   | -                              | 128.5 | K02895 <b>RP-L24, MRPL24, rplX; large subunit ribosomal protein L24</b>                                         | 1149                                          | 654      | 119                      | 1612                    | 11         | 37 |  |                         |
| H3lac                         | H_contig_1010 | 10615     | 11550   | -                              | 127.7 | K03040 rpoA; DNA-directed RNA polymerase subunit alpha [EC:2.7.7.6]                                             | 1493                                          | 592      | 86                       | 1893                    | 14         | 40 |  |                         |
| H3lac                         | H_contig_1089 | 25374     | 25685   | -                              | 125.0 | K02888 <b>RP-L21, MRPL21, rplU; large subunit ribosomal protein L21</b>                                         | 1096                                          | 308      | 28                       | 1230                    | 10         | 38 |  |                         |
| H3lac                         | H_contig_1010 | 24088     | 24711   | -                              | 119.9 | K02906 <b>RP-L3, MRPL3, rplC; large subunit ribosomal protein L3</b>                                            | 1314                                          | 526      | 46                       | 1640                    | 13         | 40 |  |                         |
| H3lac                         | H_contig_1010 | 21924     | 22202   | -                              | 111.6 | K02965 <b>RP-S19, rpsS; small subunit ribosomal protein S19</b>                                                 | 1642                                          | 703      | 127                      | 2096                    | 18         | 35 |  |                         |
| H3lac                         | H_contig_1010 | 23151     | 23438   | -                              | 96.2  | K02892 <b>RP-L23, MRPL23, rplW; large subunit ribosomal protein L23</b>                                         | 1371                                          | 652      | 56                       | 1805                    | 17         | 38 |  |                         |
| H3lac                         | H_contig_417  | 44484     | 44951   | +                              | 95.2  | K02992 <b>RP-S7, MRPS7, rpsG; small subunit ribosomal protein S7</b>                                            | 834                                           | 282      | 18                       | 1063                    | 10         | 37 |  |                         |
| H3lac                         | H_contig_1010 | 15122     | 15571   | -                              | 93.1  | K02876 <b>RP-L15, MRPL15, rplO; large subunit ribosomal protein L15</b>                                         | 1131                                          | 463      | 166                      | 1365                    | 14         | 32 |  |                         |
| H3lac                         | H_contig_1010 | 15882     | 16376   | -                              | 82.5  | K02988 <b>RP-S5, MRPS5, rpsE; small subunit ribosomal protein S5</b>                                            | 1595                                          | 661      | 162                      | 1816                    | 23         | 36 |  |                         |
| H3lac                         | H_contig_63   | 73952     | 74461   | +                              | 82.1  | K02109 ATPFOB, atpF; F-type H <sup>+</sup> -transporting ATPase subunit b [EC:3.6.3.14]                         | 881                                           | 767      | 163                      | 1132                    | 13         | 34 |  |                         |
| H3lac                         | H_contig_417  | 45235     | 47310   | +                              | 78.6  | K02355 fusA, GFM, EFG; elongation factor G                                                                      | 673                                           | 285      | 23                       | 856                     | 10         | 39 |  |                         |
| H3lac                         | H_contig_210  | 78621     | 79316   | +                              | 78.1  | K01834 <b>PGAM, gpmA; 2,3-bisphosphoglycerate-dependent phosphoglycerate mutase</b>                             | 768                                           | 329      | 14                       | 984                     | 12         | 37 |  |                         |
| H3lac                         | H_contig_1010 | 18457     | 18999   | -                              | 74.0  | K02931 <b>RP-L5, MRPL5, rplE; large subunit ribosomal protein L5</b>                                            | 1118                                          | 466      | 97                       | 1506                    | 18         | 39 |  |                         |
| H3lac                         | H_contig_1010 | 18156     | 18464   | +                              | 72.5  | -                                                                                                               | 1283                                          | 544      | 155                      | 1653                    | 21         | 34 |  |                         |
| H3lac                         | H_contig_208  | 16165     | 16674   | -                              | 68.1  | K03111 ssb; single-strand DNA-binding protein                                                                   | 1460                                          | 459      | 67                       | 1456                    | 26         | 34 |  |                         |
| H3lac                         | H_contig_1010 | 12002     | 12367   | -                              | 67.6  | K02952 <b>RP-S13, rpsM; small subunit ribosomal protein S13</b>                                                 | 1767                                          | 837      | 112                      | 2275                    | 31         | 36 |  |                         |
| H3lac                         | H_contig_1010 | 22303     | 23136   | -                              | 67.3  | K02886 <b>RP-L2, MRPL2, rplB; large subunit ribosomal protein L2</b>                                            | 772                                           | 359      | 47                       | 1115                    | 14         | 38 |  |                         |
| H3lac                         | H_contig_352  | 11252     | 12043   | -                              | 62.2  | K02795 <b>PTS-Man-EIIC, manY; PTS system, mannose-specific IIC component</b>                                    | 537                                           | 937      | 148                      | 2185                    | 10         | 39 |  |                         |
| H3lac                         | H_contig_1010 | 20270     | 20476   | -                              | 61.8  | K02904 <b>RP-L29, rpmC; large subunit ribosomal protein L29</b>                                                 | 1226                                          | 668      | 83                       | 1683                    | 24         | 37 |  |                         |
| H3lac                         | H_contig_208  | 15872     | 16117   | -                              | 61.7  | K02963 <b>RP-S18, MRPS18, rpsR; small subunit ribosomal protein S18</b>                                         | 686                                           | 227      | 51                       | 600                     | 13         | 34 |  |                         |
| H3lac                         | H_contig_1010 | 21560     | 21904   | -                              | 59.8  | K02890 <b>RP-L22, MRPL22, rplV; large subunit ribosomal protein L22</b>                                         | 1659                                          | 748      | 80                       | 1926                    | 33         | 39 |  |                         |
| H3lac                         | H_contig_208  | 26120     | 28228   | -                              | 57.4  | K01915 glnA; glutamine synthetase [EC:6.3.1.2]                                                                  | 894                                           | 650      | 26                       | 1322                    | 19         | 40 |  |                         |
| H3lac                         | H_contig_481  | 31477     | 31977   | +                              | 57.4  | K02864 <b>RP-L10, MRPL10, rplJ; large subunit ribosomal protein L10</b>                                         | 2038                                          | 797      | 101                      | 2393                    | 42         | 27 |  |                         |
| H3lac                         | H_contig_313  | 7376      | 8257    | +                              | 54.1  | K01624 <b>FBA, fbaA; fructose-bisphosphate aldolase, class II</b>                                               | 1845                                          | 1347     | 108                      | 2516                    | 41         | 36 |  |                         |
| H3lac                         | H_contig_1010 | 16397     | 16744   | -                              | 53.0  | K02881 <b>RP-L18, MRPL18, rplR; large subunit ribosomal protein L18</b>                                         | 1042                                          | 409      | 135                      | 1358                    | 23         | 37 |  |                         |
| H3lac                         | H_contig_352  | 10416     | 11240   | -                              | 52.6  | K02796 <b>PTS-Man-EIID, manZ; PTS system, mannose-specific IID component</b>                                    | 524                                           | 824      | 272                      | 2165                    | 12         | 40 |  |                         |
| H3lac                         | H_contig_63   | 73229     | 73939   | +                              | 52.1  | K02108 ATPFOA, atpB; F-type H <sup>+</sup> -transporting ATPase subunit a                                       | 701                                           | 608      | 110                      | 845                     | 16         | 33 |  |                         |

Supplementary Table S17. *Continued*

| Bin-genom ID | Contig ID      | ORF begin | ORF end | Expression dynamics (SP/AcPro) | KO    | KO description<br>[Yellow highlight: Fermentation-related metabolic genes]<br>[Blue letter: Ribosomal proteins] | Gene expression level (mRNA <sub>RPKM</sub> )                              |          |                          |                         |            |    | Ave DNA <sub>RPKM</sub> |
|--------------|----------------|-----------|---------|--------------------------------|-------|-----------------------------------------------------------------------------------------------------------------|----------------------------------------------------------------------------|----------|--------------------------|-------------------------|------------|----|-------------------------|
|              |                |           |         |                                |       |                                                                                                                 | Con1 SP                                                                    | Con2 SP+ | Con3 OC <sub>short</sub> | Con4 OC <sub>long</sub> | Con5 ACP10 |    |                         |
| M2lac        | M_contig_349   | 20446     | 20874   | -                              | 266.7 | K02878                                                                                                          | RP-L16, MRPL16, rplP; large subunit ribosomal protein L16                  | 3863     | 1805                     | 918                     | 2727       | 14 | 31                      |
| M2lac        | M_contig_349   | 15862     | 16356   | -                              | 206.5 | K02988                                                                                                          | RP-S5, MRPS5, rpsE; small subunit ribosomal protein S5                     | 2592     | 1076                     | 703                     | 1890       | 13 | 31                      |
| M2lac        | M_contig_349   | 21904     | 22182   | -                              | 174.8 | K02965                                                                                                          | RP-S19, rpsS; small subunit ribosomal protein S19                          | 3894     | 1288                     | 752                     | 2700       | 22 | 27                      |
| M2lac        | M_contig_349   | 19967     | 20227   | -                              | 153.2 | K02961                                                                                                          | RP-S17, MRPS17, rpsQ; small subunit ribosomal protein S17                  | 3648     | 1331                     | 785                     | 2624       | 24 | 29                      |
| M2lac        | M_contig_349   | 24068     | 24691   | -                              | 143.4 | K02906                                                                                                          | RP-L3, MRPL3, rplC; large subunit ribosomal protein L3                     | 2855     | 1192                     | 677                     | 2139       | 20 | 33                      |
| M2lac        | M_contig_349   | 18136     | 18444   | +                              | 141.6 | -                                                                                                               | -                                                                          | 2848     | 929                      | 509                     | 1602       | 20 | 28                      |
| M2lac        | M_contig_137   | 31526     | 32026   | +                              | 139.5 | K02864                                                                                                          | RP-L10, MRPL10, rplJ; large subunit ribosomal protein L10                  | 3461     | 1262                     | 774                     | 2487       | 25 | 23                      |
| M2lac        | M_contig_349   | 19575     | 19943   | -                              | 135.1 | K02874                                                                                                          | RP-L14, MRPL14, rplN; large subunit ribosomal protein L14                  | 2275     | 990                      | 650                     | 1670       | 17 | 30                      |
| M2lac        | M_contig_349   | 17583     | 17981   | -                              | 122.7 | K02994                                                                                                          | RP-S8, rpsH; small subunit ribosomal protein S8                            | 1911     | 681                      | 418                     | 1203       | 16 | 34                      |
| M2lac        | M_contig_129   | 68780     | 69964   | -                              | 117.5 | K01999                                                                                                          | livK; branched-chain amino acid transport system substrate-binding protein | 1232     | 785                      | 508                     | 1166       | 10 | 35                      |
| M2lac        | M_contig_628   | 4003      | 4416    | -                              | 113.5 | K02950                                                                                                          | RP-S12, MRPS12, rpsL; small subunit ribosomal protein S12                  | 1703     | 771                      | 426                     | 1311       | 15 | 30                      |
| M2lac        | M_contig_349   | 10595     | 11530   | -                              | 112.5 | K03040                                                                                                          | rpoA; DNA-directed RNA polymerase subunit alpha                            | 2987     | 1211                     | 725                     | 1921       | 27 | 34                      |
| M2lac        | M_contig_272   | 9719      | 10495   | +                              | 111.5 | K02967                                                                                                          | RP-S2, MRPS2, rpsB; small subunit ribosomal protein S2                     | 1784     | 644                      | 352                     | 1151       | 16 | 33                      |
| M2lac        | M_contig_364   | 136452    | 137333  | -                              | 110.5 | K01624                                                                                                          | FBA, fbaA; fructose-bisphosphate aldolase, class I                         | 3113     | 1940                     | 1400                    | 3424       | 28 | 30                      |
| M2lac        | M_contig_349   | 22283     | 23116   | -                              | 110.4 | K02886                                                                                                          | RP-L2, MRPL2, rplB; large subunit ribosomal protein L2                     | 1645     | 646                      | 320                     | 1072       | 15 | 30                      |
| M2lac        | M_contig_272   | 70130     | 70441   | +                              | 108.1 | K02888                                                                                                          | RP-L21, MRPL21, rplU; large subunit ribosomal protein L21                  | 2152     | 798                      | 474                     | 1603       | 20 | 30                      |
| M2lac        | M_contig_349   | 16926     | 17462   | -                              | 102.7 | K02933                                                                                                          | RP-L6, MRPL6, rplF; large subunit ribosomal protein L6                     | 2376     | 965                      | 553                     | 1788       | 23 | 31                      |
| M2lac        | M_contig_349   | 16377     | 16724   | -                              | 97.6  | K02881                                                                                                          | RP-L18, MRPL18, rplR; large subunit ribosomal protein L18                  | 1743     | 780                      | 393                     | 1426       | 18 | 33                      |
| M2lac        | M_contig_349   | 15672     | 15851   | -                              | 88.8  | K02907                                                                                                          | RP-L30, MRPL30, rpmD; large subunit ribosomal protein L30                  | 3064     | 1331                     | 653                     | 1954       | 35 | 27                      |
| M2lac        | M_contig_197   | 50041     | 51018   | -                              | 73.3  | K00016                                                                                                          | LDH, ldh; L-lactate dehydrogenase [EC:1.1.1.27]                            | 1398     | 757                      | 497                     | 1493       | 19 | 24                      |
| M2lac        | M_contig_349   | 23418     | 24044   | -                              | 67.8  | K02926                                                                                                          | RP-L4, MRPL4, rplD; large subunit ribosomal protein L4                     | 2016     | 726                      | 461                     | 1496       | 30 | 32                      |
| M2lac        | M_contig_628   | 3515      | 3982    | -                              | 62.1  | K02992                                                                                                          | RP-S7, MRPS7, rpsG; small subunit ribosomal protein S7                     | 1650     | 707                      | 407                     | 1173       | 27 | 29                      |
| M2lac        | M_contig_349   | 19002     | 19307   | -                              | 62.1  | K02895                                                                                                          | RP-L24, MRPL24, rplX; large subunit ribosomal protein L24                  | 2524     | 1136                     | 607                     | 1932       | 41 | 32                      |
| M2lac        | M_contig_256   | 55293     | 55652   | -                              | 61.8  | K02887                                                                                                          | RP-L20, MRPL20, rplT; large subunit ribosomal protein L20                  | 1066     | 313                      | 190                     | 655        | 17 | 29                      |
| M2lac        | M_contig_256   | 34978     | 36219   | -                              | 61.3  | K02945                                                                                                          | RP-S1, rpsA; small subunit ribosomal protein S1                            | 1533     | 579                      | 389                     | 1297       | 25 | 27                      |
| M2lac        | M_contig_349   | 12510     | 12728   | -                              | 57.9  | K02518                                                                                                          | infA; translation initiation factor IF-1                                   | 3285     | 937                      | 667                     | 2056       | 57 | 26                      |
| M2lac        | M_contig_256   | 5440      | 5787    | -                              | 56.5  | K02884                                                                                                          | RP-L19, MRPL19, rplS; large subunit ribosomal protein L19                  | 2019     | 794                      | 356                     | 1269       | 36 | 23                      |
| M2lac        | M_contig_193   | 113722    | 114417  | +                              | 56.3  | K01834                                                                                                          | PGAM, gpmA; 2,3-bisphosphoglycerate-dependent phosphoglycerate mutase      | 1509     | 578                      | 342                     | 1631       | 27 | 30                      |
| M2lac        | M_contig_137   | 78117     | 79124   | -                              | 53.7  | K00850                                                                                                          | pfkA, PFK; 6-phosphofructokinase 1 [EC:2.7.1.11]                           | 1325     | 644                      | 498                     | 1387       | 25 | 23                      |
| M2lac        | M_contig_197   | 11705     | 12757   | +                              | 53.6  | K07335                                                                                                          | bmpA, bmpB, tmpC; basic membrane protein A and related proteins            | 950      | 641                      | 671                     | 962        | 18 | 26                      |
| L12lac       | L_contig_916   | 20430     | 20858   | -                              | 39.6  | K02878                                                                                                          | RP-L16, MRPL16, rplP; large subunit ribosomal protein L16                  | 556      | 555                      | 559                     | 501        | 14 | 10                      |
| L12lac       | L_contig_3847  | 86502     | 87002   | -                              | 37.7  | K02864                                                                                                          | RP-L10, MRPL10, rplJ; large subunit ribosomal protein L10                  | 454      | 520                      | 359                     | 369        | 12 | 6                       |
| L12lac       | L_contig_3853  | 20044     | 20844   | +                              | 37.2  | K02358                                                                                                          | tuf, TUFM; elongation factor Tu                                            | 560      | 659                      | 494                     | 602        | 15 | 9                       |
| L12lac       | L_contig_917   | 16864     | 17745   | -                              | 30.6  | K01624                                                                                                          | FBA, fbaA; fructose-bisphosphate aldolase, class II                        | 419      | 557                      | 428                     | 383        | 14 | 8                       |
| L12lac       | L_contig_916   | 15846     | 16340   | -                              | 25.4  | K02988                                                                                                          | RP-S5, MRPS5, rpsE; small subunit ribosomal protein S5                     | 310      | 391                      | 351                     | 390        | 12 | 9                       |
| L12lac       | L_contig_916   | 23115     | 23402   | -                              | 25.4  | K02892                                                                                                          | RP-L23, MRPL23, rplW; large subunit ribosomal protein L23                  | 533      | 516                      | 333                     | 443        | 21 | 9                       |
| L12lac       | L_contig_1525  | 17388     | 17678   | +                              | 24.5  | -                                                                                                               | -                                                                          | 254      | 102                      | 124                     | 208        | 10 | 8                       |
| L12lac       | L_contig_3847  | 85994     | 86359   | -                              | 22.6  | K02935                                                                                                          | RP-L7, MRPL12, rplL; large subunit ribosomal protein L7/L12                | 373      | 447                      | 328                     | 317        | 16 | 8                       |
| L12lac       | L_contig_916   | 19951     | 20211   | -                              | 22.6  | K02961                                                                                                          | RP-S17, MRPS17, rpsQ; small subunit ribosomal protein S17                  | 261      | 513                      | 413                     | 425        | 12 | 11                      |
| L12lac       | L_contig_3257  | 38036     | 39448   | -                              | 15.9  | K02112                                                                                                          | ATPF1B, atpD; F-type H <sup>+</sup> -transporting ATPase subunit beta      | 237      | 321                      | 284                     | 176        | 15 | 8                       |
| L12lac       | L_contig_1917  | 19529     | 19774   | +                              | 15.1  | K02963                                                                                                          | RP-S18, MRPS18, rpsR; small subunit ribosomal protein S18                  | 185      | 302                      | 146                     | 150        | 12 | 9                       |
| L12lac       | L_contig_1465  | 50813     | 52888   | +                              | 14.1  | K02355                                                                                                          | fusA, GFM, EFG; elongation factor G                                        | 164      | 233                      | 167                     | 157        | 12 | 9                       |
| L12lac       | L_contig_552   | 6135      | 8081    | +                              | 13.8  | K02809                                                                                                          | PTS-Scr-EIIB, scrA; PTS system, sucrose-specific IIB component             | 213      | 409                      | 1247                    | 469        | 15 | 7                       |
| L12lac       | L_contig_2066  | 27658     | 28983   | -                              | 13.0  | K01689                                                                                                          | ENO, eno; enolase [EC:4.2.1.11]                                            | 531      | 667                      | 606                     | 490        | 41 | 10                      |
| L12lac       | L_contig_916   | 18421     | 18963   | -                              | 11.9  | K02931                                                                                                          | RP-L5, MRPL5, rplE; large subunit ribosomal protein L5                     | 199      | 301                      | 265                     | 238        | 17 | 11                      |
| L12lac       | L_contig_916   | 21888     | 22166   | -                              | 11.3  | K02965                                                                                                          | RP-S19, rpsS; small subunit ribosomal protein S19                          | 367      | 693                      | 430                     | 542        | 32 | 9                       |
| L12lac       | L_contig_2462  | 9445      | 9735    | +                              | 11.3  | K02899                                                                                                          | RP-L27, MRPL27, rpmA; large subunit ribosomal protein L27                  | 117      | 153                      | 124                     | 156        | 10 | 9                       |
| L12lac       | L_contig_916   | 1580      | 2650    | -                              | 9.7   | K00053                                                                                                          | ivc; ketol-acid reductoisomerase [EC:1.1.1.86]                             | 329      | 389                      | 291                     | 251        | 34 | 10                      |
| L12lac       | L_contig_1525  | 2324      | 2605    | -                              | 9.4   | K07729                                                                                                          | putative transcriptional regulator                                         | 101      | 79                       | 106                     | 113        | 11 | 8                       |
| L12lac       | L_contig_505   | 2         | 322     | -                              | 8.0   | K02884                                                                                                          | RP-L19, MRPL19, rplS; large subunit ribosomal protein L19                  | 301      | 185                      | 336                     | 209        | 38 | 8                       |
| L12lac       | L_contig_1104  | 1496      | 2509    | +                              | 7.7   | K00134                                                                                                          | GAPDH, gapA; glyceraldehyde 3-phosphate dehydrogenase                      | 616      | 814                      | 1094                    | 747        | 80 | 10                      |
| L12lac       | L_contig_916   | 15656     | 15835   | -                              | 7.5   | K02907                                                                                                          | RP-L30, MRPL30, rpmD; large subunit ribosomal protein L30                  | 379      | 578                      | 300                     | 401        | 50 | 8                       |
| L12lac       | L_contig_2489  | 24434     | 25024   | +                              | 7.5   | K01704                                                                                                          | leuD; 3-isopropylmalate/(R)-2-methylmalate dehydratase small subunit       | 77       | 76                       | 30                      | 43         | 10 | 9                       |
| L12lac       | L_contig_34436 | 3         | 1220    | -                              | 7.3   | -                                                                                                               | -                                                                          | 145      | 201                      | 221                     | 154        | 20 | 11                      |
| L12lac       | L_contig_623   | 57146     | 58342   | +                              | 7.3   | K00927                                                                                                          | PGK, pgk; phosphoglycerate kinase [EC:2.7.2.3]                             | 147      | 267                      | 255                     | 211        | 20 | 10                      |
| L12lac       | L_contig_1761  | 13635     | 14759   | -                              | 7.1   | -                                                                                                               | -                                                                          | 76       | 99                       | 336                     | 149        | 11 | 9                       |
| L12lac       | L_contig_3101  | 4020      | 5651    | +                              | 6.5   | K04077                                                                                                          | groEL, HSPD1; chaperonin GroEL                                             | 84       | 73                       | 114                     | 89         | 13 | 11                      |
| L12lac       | L_contig_1179  | 123806    | 124747  | +                              | 6.3   | K02796                                                                                                          | PTS-Man-EIID, manZ; PTS system, mannose-specific IID component             | 121      | 221                      | 363                     | 157        | 19 | 8                       |
| L12lac       | L_contig_3257  | 37595     | 38014   | -                              | 5.7   | K02114                                                                                                          | ATPF1E, atpC; F-type H <sup>+</sup> -transporting ATPase subunit epsilon   | 203      | 301                      | 314                     | 184        | 36 | 8                       |
| L12lac       | L_contig_1104  | 17899     | 19116   | +                              | 5.3   | -                                                                                                               | -                                                                          | 79       | 98                       | 133                     | 99         | 15 | 10                      |

Supplementary Table S17. Continued

| Bin-genom ID           | Contig ID     | ORF begin | ORF end | Expression dynamics (SP/ACPro) | KO    | KO description<br>[Yellow highlight: Fermentation-related metabolic genes]<br>[Blue letter: Ribosomal proteins] | Gene expression level (mRNA <sub>RPKM</sub> ) |          |                          |                         |            |    | Ave DNA <sub>RPKM</sub> |
|------------------------|---------------|-----------|---------|--------------------------------|-------|-----------------------------------------------------------------------------------------------------------------|-----------------------------------------------|----------|--------------------------|-------------------------|------------|----|-------------------------|
|                        |               |           |         |                                |       |                                                                                                                 | Con1 SP                                       | Con2 SP+ | Con3 OC <sub>short</sub> | Con4 OC <sub>long</sub> | Con5 ACPro |    |                         |
| <b>OCS H6fir/M5fir</b> |               |           |         |                                |       |                                                                                                                 |                                               |          |                          |                         |            |    |                         |
| H6fir                  | H_contig_598  | 12765     | 13136   | +                              | 109.7 | K02952 RP-S13, rpsM; small subunit ribosomal protein S13                                                        | 1013                                          | 803      | 896                      | 784                     | 11         | 12 |                         |
| H6fir                  | H_contig_1053 | 101257    | 101487  | -                              | 90.0  | K06960 K06960                                                                                                   | 892                                           | 850      | 725                      | 914                     | 12         | 11 |                         |
| H6fir                  | H_contig_598  | 5465      | 5833    | +                              | 79.4  | K02874 RP-L14, MRPL14, rplN; large subunit ribosomal protein L14                                                | 986                                           | 697      | 851                      | 970                     | 15         | 13 |                         |
| H6fir                  | H_contig_598  | 8373      | 8873    | +                              | 77.7  | K02988 RP-S5, MRPS5, rpsE; small subunit ribosomal protein S5                                                   | 1065                                          | 758      | 890                      | 936                     | 16         | 13 |                         |
| H6fir                  | H_contig_2987 | 2         | 184     | -                              | 76.5  | K02358 tuf, TUFM; elongation factor Tu                                                                          | 958                                           | 564      | 758                      | 951                     | 15         | 10 |                         |
| H6fir                  | H_contig_2987 | 2337      | 2807    | -                              | 74.2  | K02992 RP-S7, MRPS7, rpsG; small subunit ribosomal protein S7                                                   | 1444                                          | 1084     | 1155                     | 1724                    | 23         | 13 |                         |
| H6fir                  | H_contig_1257 | 9406      | 9708    | -                              | 72.8  | K10858 PMS2; DNA mismatch repair protein PMS2                                                                   | 1375                                          | 1173     | 992                      | 1979                    | 23         | 14 |                         |
| H6fir                  | H_contig_598  | 11451     | 12197   | +                              | 68.8  | K01265 map; methionyl aminopeptidase [EC:3.4.11.18]                                                             | 949                                           | 712      | 829                      | 775                     | 16         | 14 |                         |
| H6fir                  | H_contig_598  | 6770      | 6955    | +                              | 67.3  | K02954 RP-S14, MRPS14, rpsN; small subunit ribosomal protein S14                                                | 829                                           | 670      | 777                      | 667                     | 15         | 12 |                         |
| H6fir                  | H_contig_2987 | 224       | 2311    | -                              | 63.2  | K02355 fusA, GFM, EFG; elongation factor G                                                                      | 1595                                          | 1246     | 1294                     | 1772                    | 30         | 14 |                         |
| H6fir                  | H_contig_598  | 14068     | 14502   | -                              | 62.0  | K02867 RP-L11, MRPL11, rplK; large subunit ribosomal protein L11                                                | 816                                           | 698      | 680                      | 671                     | 16         | 13 |                         |
| H6fir                  | H_contig_598  | 2278      | 3105    | +                              | 57.8  | K02886 RP-L2, MRPL2, rplB; large subunit ribosomal protein L2                                                   | 960                                           | 643      | 822                      | 1127                    | 20         | 12 |                         |
| H6fir                  | H_contig_598  | 14266     | 15219   | +                              | 57.7  | K03040 rpoA; DNA-directed RNA polymerase subunit alpha                                                          | 900                                           | 719      | 843                      | 757                     | 19         | 14 |                         |
| H6fir                  | H_contig_598  | 6983      | 7381    | +                              | 57.7  | K02994 RP-S8, rpsH; small subunit ribosomal protein S8                                                          | 1324                                          | 995      | 1258                     | 1252                    | 27         | 13 |                         |
| H6fir                  | H_contig_3257 | 4242      | 4526    | -                              | 57.7  | K00960 DNA-directed RNA polymerase [EC:2.7.7.6]                                                                 | 1159                                          | 1055     | 980                      | 1244                    | 24         | 14 |                         |
| H6fir                  | H_contig_598  | 3174      | 3410    | +                              | 56.8  | K02965 RP-S19, rpsS; small subunit ribosomal protein S19                                                        | 1371                                          | 1119     | 1341                     | 1340                    | 29         | 12 |                         |
| H6fir                  | H_contig_598  | 19592     | 19984   | +                              | 55.6  | K02996 RP-S9, MRPS9, rpsI; small subunit ribosomal protein S9                                                   | 648                                           | 544      | 456                      | 697                     | 14         | 12 |                         |
| H6fir                  | H_contig_598  | 1335      | 1961    | +                              | 53.3  | K02926 RP-L4, MRPL4, rplD; large subunit ribosomal protein L4                                                   | 973                                           | 719      | 811                      | 966                     | 22         | 13 |                         |
| H6fir                  | H_contig_598  | 7984      | 8352    | +                              | 52.6  | K02881 RP-L18, MRPL18, rplR; large subunit ribosomal protein L18                                                | 1143                                          | 843      | 924                      | 952                     | 26         | 12 |                         |
| H6fir                  | H_contig_598  | 19130     | 19570   | +                              | 52.6  | K02871 RP-L13, MRPL13, rplM; large subunit ribosomal protein L13                                                | 683                                           | 519      | 522                      | 647                     | 15         | 15 |                         |
| H6fir                  | H_contig_2987 | 12164     | 12532   | -                              | 52.3  | K02935 RP-L7, MRPL7, rplL; large subunit ribosomal protein L7/L12                                               | 649                                           | 766      | 783                      | 406                     | 15         | 15 |                         |
| H6fir                  | H_contig_598  | 33223     | 34296   | +                              | 52.0  | K00826 ivE; branched-chain amino acid aminotransferase [EC:2.6.1.42]                                            | 499                                           | 475      | 482                      | 621                     | 11         | 14 |                         |
| H6fir                  | H_contig_598  | 13159     | 13551   | +                              | 50.9  | K02948 RP-S11, MRPS11, rpsK; small subunit ribosomal protein S11                                                | 1336                                          | 1041     | 1296                     | 1050                    | 31         | 11 |                         |
| H6fir                  | H_contig_598  | 3         | 158     | +                              | 50.3  | K02358 tuf, TUFM; elongation factor Tu                                                                          | 1107                                          | 980      | 1105                     | 1343                    | 26         | 10 |                         |
| H6fir                  | H_contig_1254 | 27702     | 28013   | +                              | 50.0  | K02888 RP-L21, MRPL21, rplU; large subunit ribosomal protein L21                                                | 917                                           | 688      | 772                      | 909                     | 22         | 12 |                         |
| H6fir                  | H_contig_598  | 660       | 1301    | +                              | 49.9  | K02906 RP-L3, MRPL3, rplC; large subunit ribosomal protein L3                                                   | 1157                                          | 929      | 1046                     | 1278                    | 28         | 12 |                         |
| H6fir                  | H_contig_598  | 7428      | 7958    | +                              | 49.4  | K02933 RP-L6, MRPL6, rplF; large subunit ribosomal protein L6                                                   | 639                                           | 462      | 559                      | 549                     | 15         | 13 |                         |
| H6fir                  | H_contig_1576 | 1096      | 2847    | -                              | 48.0  | K00239 sdhA; succinate dehydrogenase flavoprotein subunit                                                       | 659                                           | 927      | 1054                     | 832                     | 16         | 14 |                         |
| H6fir                  | H_contig_598  | 3462      | 3794    | +                              | 47.9  | K02890 RP-L22, MRPL22, rplV; large subunit ribosomal protein L22                                                | 989                                           | 824      | 928                      | 997                     | 25         | 14 |                         |
| H6fir                  | H_contig_598  | 3817      | 4479    | +                              | 45.9  | K02982 RP-S3, rpsC; small subunit ribosomal protein S3                                                          | 1267                                          | 988      | 1053                     | 1118                    | 33         | 13 |                         |
| M5fir                  | M_contig_1319 | 42677     | 43120   | -                              | 97.5  | K02878 RP-L16, MRPL16, rplP; large subunit ribosomal protein L16                                                | 1037                                          | 750      | 1007                     | 225                     | 11         | 8  |                         |
| M5fir                  | M_contig_1319 | 41769     | 42137   | -                              | 78.7  | K02874 RP-L14, MRPL14, rplN; large subunit ribosomal protein L14                                                | 1006                                          | 672      | 862                      | 191                     | 13         | 7  |                         |
| M5fir                  | M_contig_899  | 105       | 407     | -                              | 71.8  | -                                                                                                               | 2238                                          | 2307     | 1540                     | 908                     | 31         | 10 |                         |
| M5fir                  | M_contig_298  | 12739     | 13122   | +                              | 55.6  | K02950 RP-S12, MRPS12, rpsL; small subunit ribosomal protein S12                                                | 1367                                          | 1379     | 1265                     | 464                     | 25         | 7  |                         |
| M5fir                  | M_contig_1319 | 27618     | 28010   | -                              | 53.2  | K02996 RP-S9, MRPS9, rpsI; small subunit ribosomal protein S9                                                   | 639                                           | 558      | 514                      | 389                     | 12         | 9  |                         |
| M5fir                  | M_contig_588  | 228772    | 229644  | -                              | 52.8  | K02528 ksgA; 16S rRNA (adenine1518-N6/adenine1519-N6)-dimethyltransferase                                       | 571                                           | 113      | 85                       | 131                     | 11         | 9  |                         |
| M5fir                  | M_contig_1319 | 44192     | 44428   | -                              | 52.3  | K02965 RP-S19, rpsS; small subunit ribosomal protein S19                                                        | 1041                                          | 766      | 890                      | 248                     | 20         | 7  |                         |
| M5fir                  | M_contig_1319 | 46959     | 47270   | -                              | 49.2  | K02946 RP-S10, MRPS10, rpsJ; small subunit ribosomal protein S10                                                | 1490                                          | 1033     | 1319                     | 391                     | 30         | 9  |                         |
| M5fir                  | M_contig_1319 | 38071     | 38511   | -                              | 44.7  | K02876 RP-L15, MRPL15, rplO; large subunit ribosomal protein L15                                                | 479                                           | 367      | 448                      | 77                      | 11         | 7  |                         |
| M5fir                  | M_contig_1318 | 63973     | 65016   | -                              | 40.6  | K03522 fixB, etfA; electron transfer flavoprotein alpha subunit                                                 | 735                                           | 1774     | 1937                     | 396                     | 18         | 8  |                         |
| M5fir                  | M_contig_1319 | 44497     | 45324   | -                              | 40.3  | K02886 RP-L2, MRPL2, rplB; large subunit ribosomal protein L2                                                   | 918                                           | 687      | 786                      | 222                     | 23         | 7  |                         |
| M5fir                  | M_contig_1319 | 42484     | 42687   | -                              | 40.0  | K02904 RP-L29, rpmC; large subunit ribosomal protein L29                                                        | 927                                           | 875      | 969                      | 224                     | 23         | 8  |                         |
| M5fir                  | M_contig_298  | 13651     | 15738   | +                              | 38.5  | K02355 fusA, GFM, EFG; elongation factor G                                                                      | 1478                                          | 1414     | 1471                     | 407                     | 38         | 9  |                         |
| M5fir                  | M_contig_1319 | 43808     | 44140   | -                              | 37.4  | K02890 RP-L22, MRPL22, rplV; large subunit ribosomal protein L22                                                | 1062                                          | 513      | 772                      | 194                     | 28         | 8  |                         |
| M5fir                  | M_contig_1318 | 62552     | 63958   | -                              | 35.4  | K00104 glcD; glycolate oxidase [EC:1.1.3.15]                                                                    | 713                                           | 1483     | 1596                     | 298                     | 20         | 8  |                         |
| M5fir                  | M_contig_1319 | 34466     | 34837   | -                              | 34.6  | K02952 RP-S13, rpsM; small subunit ribosomal protein S13                                                        | 879                                           | 651      | 899                      | 178                     | 25         | 8  |                         |
| M5fir                  | M_contig_1318 | 49199     | 49468   | +                              | 33.4  | K02968 RP-S20, rpsT; small subunit ribosomal protein S20                                                        | 585                                           | 824      | 842                      | 338                     | 17         | 8  |                         |
| M5fir                  | M_contig_146  | 124164    | 125522  | -                              | 32.2  | K03545 tig; trigger factor                                                                                      | 335                                           | 287      | 347                      | 161                     | 10         | 9  |                         |
| M5fir                  | M_contig_1319 | 47444     | 47581   | -                              | 32.0  | K02358 tuf, TUFM; elongation factor Tu                                                                          | 1096                                          | 943      | 980                      | 245                     | 34         | 6  |                         |
| M5fir                  | M_contig_1318 | 65045     | 65836   | -                              | 32.0  | K03521 fixA, etfB; electron transfer flavoprotein beta subunit                                                  | 573                                           | 1316     | 1574                     | 275                     | 18         | 8  |                         |
| M5fir                  | M_contig_1319 | 43123     | 43785   | -                              | 30.9  | K02982 RP-S3, rpsC; small subunit ribosomal protein S3                                                          | 1321                                          | 910      | 1062                     | 293                     | 43         | 8  |                         |
| M5fir                  | M_contig_1318 | 18955     | 19362   | -                              | 30.6  | -                                                                                                               | 354                                           | 456      | 492                      | 105                     | 12         | 7  |                         |
| M5fir                  | M_contig_146  | 142446    | 143003  | -                              | 30.1  | K01676 fumA, fumB; fumarate hydratase, class I                                                                  | 510                                           | 840      | 919                      | 353                     | 17         | 9  |                         |
| M5fir                  | M_contig_189  | 22195     | 22638   | -                              | 30.1  | K00962 pnp, PNPT1; polyribonucleotide nucleotidyltransferase                                                    | 321                                           | 303      | 338                      | 205                     | 11         | 8  |                         |
| M5fir                  | M_contig_189  | 86022     | 86306   | -                              | 29.8  | K00960 DNA-directed RNA polymerase [EC:2.7.7.6]                                                                 | 1482                                          | 1826     | 1423                     | 754                     | 50         | 11 |                         |
| M5fir                  | M_contig_1319 | 40848     | 41387   | -                              | 28.9  | K02931 RP-L5, MRPL5, rplE; large subunit ribosomal protein L5                                                   | 758                                           | 712      | 864                      | 196                     | 26         | 8  |                         |
| M5fir                  | M_contig_1319 | 36814     | 38070   | -                              | 28.2  | K03076 secY; preprotein translocase subunit SecY                                                                | 953                                           | 841      | 956                      | 188                     | 34         | 8  |                         |
| M5fir                  | M_contig_751  | 118990    | 119748  | -                              | 26.1  | K02500 hisF; cyclase [EC:4.1.3.-]                                                                               | 325                                           | 155      | 137                      | 23                      | 12         | 8  |                         |
| M5fir                  | M_contig_1319 | 45641     | 46267   | -                              | 25.2  | K02926 RP-L4, MRPL4, rplD; large subunit ribosomal protein L4                                                   | 947                                           | 789      | 780                      | 192                     | 38         | 8  |                         |
| M5fir                  | M_contig_298  | 1461      | 1895    | +                              | 25.0  | K02867 RP-L11, MRPL11, rplK; large subunit ribosomal protein L11                                                | 542                                           | 713      | 755                      | 284                     | 22         | 9  |                         |

Supplementary Table S18. Summary of c-type cytochrome families coded in *Geobacteraceae* microbes.

| CytC family ID <sup>a</sup> | cytC family description; KO/COG                                                   |                                                                                        | Estimate d location | No of CXXCH domain | Locus tag in <i>Geobacter sulfurreducens</i> |
|-----------------------------|-----------------------------------------------------------------------------------|----------------------------------------------------------------------------------------|---------------------|--------------------|----------------------------------------------|
|                             | *Red letter, 14 key MH-cytC genes in this manuscript (also used for wCCA diagram) | *Purple letter, cytC genes used for wCCA diagram in this manuscript                    |                     |                    |                                              |
| 2568                        | <b>macA</b>                                                                       | cytochrome c peroxidase [EC:1.11.1.5]; K00428/COG1858                                  | IM                  | 2                  | GSU0466                                      |
| 1467                        | <b>cbcL</b>                                                                       | nonaheme cytochrome c (inner membrane)                                                 | IM                  | 9                  | GSU0274                                      |
| 49                          | <b>ppcA</b>                                                                       | cytochrome c3                                                                          | PP                  | 3                  | GSU0364/GSU0612                              |
| 2890                        | <b>ppcI</b>                                                                       | putative cytochrome c3                                                                 | PP                  | 3                  |                                              |
| 5994                        | <b>ppcK</b>                                                                       | putative cytochrome c3                                                                 | PP                  | 3                  |                                              |
| 1653                        | <b>omcB</b>                                                                       | polyheme membrane-associated cytochrome c (Lipo protein), part of oma/omb/omcB conduit | OM                  | 12                 | GSU2731/GSU2737                              |
| 51                          | <b>omaB</b>                                                                       | polyheme membrane-associated cytochrome c, part of oma/omb/omcB conduit                | OM/PP               | 8                  | GSU2732/GSU2738                              |
| 2177                        | <b>omcE</b>                                                                       | extracellular multi-heme cytochrome c                                                  | OM                  | 4                  | GSU0618                                      |
| 64                          | <b>omcS</b>                                                                       | extracellular multi-heme cytochrome c                                                  | OM                  | 6                  | GSU0701/GSU2503/GSU2504                      |
| 2504                        | <b>omcX</b>                                                                       | outer membrane multi-heme cytochrome c (likely periplasmic side)                       | OM                  | 11                 | GSU0670                                      |
| 2307                        | <b>omcZ</b>                                                                       | secreted multi-heme cytochrome c                                                       | OM                  | 7                  | GSU1334/GSU2076                              |
| 1253                        | <b>omcY</b>                                                                       | outer membrane multi-heme cytochrome c                                                 | OM                  | 7                  | GSU2201                                      |
| 1292                        | <b>omcQ</b>                                                                       | part of Cbc5 complex, =CbcC                                                            | OM                  | 12                 | GSU0592                                      |
| 1964                        | <b>cbcA</b>                                                                       | c-type, 7-heme binding sites, Calcium binding site (EF hand), part of Cbc5 complex     | OM/PP               | 6                  | GSU0594                                      |
| 2830                        | <b>imcG</b>                                                                       | cytochrome c peroxidase COG1858                                                        | IM                  | 2                  | GSU1538                                      |
| 2899                        | <b>cyc1</b>                                                                       | ubiquinol-cytochrome c reductase cytochrome c1 subunit; K00413/COG2857                 | IM                  | 2                  | GSU3334                                      |
| 2370                        | <b>petJ</b>                                                                       | cytochrome c6; K08906/COG2010                                                          | IM/PP               | 1                  | GSU2743                                      |
| 3139                        | <b>ppcL</b>                                                                       | periplasmic cytochrome c552 (nitrite reductase); COG3303                               | PP                  | 3                  |                                              |
| 3808                        | <b>ppcJ</b>                                                                       | tri-heme cytochrome c                                                                  | PP                  | 3                  |                                              |
| 2686                        | <b>cytT</b>                                                                       | pfam13435, poly-heme cytochrome c554                                                   | PP                  | 4                  | GSU2299                                      |
| 2992                        | <b>extA</b>                                                                       | predicted to be inner face of outer membrane, part of ExtABCD conduit                  | OM/PP               | 11                 | GSU2645                                      |
| 1768                        | <b>omcV</b>                                                                       | outer membrane polyheme cytochrome c                                                   | OM                  | 12                 | GSU1996                                      |
| 2898                        | <b>omcA</b>                                                                       | TIGR03507, decaheme c-type cytochrome, OmcA/MtrC family (Lipo protein)                 | OM                  | 10                 |                                              |
| 3550                        | <b>dmsE</b>                                                                       | TIGR03508; decahem_SO decaheme c-type cytochrome, DmsE family, partial                 | OM                  | 6                  |                                              |
| 266                         | <b>cbcM</b>                                                                       | part of Cbc6 complex                                                                   | OM                  | 12                 | GSU2935                                      |
| 267                         | <b>cbcN</b>                                                                       | part of Cbc6 complex                                                                   | OM/PP               | 10                 | GSU2934                                      |
| 271                         | <b>cbcR</b>                                                                       | Cytochrome c2 (COG3474)                                                                | -                   | 2                  | GSU2930                                      |
| 600                         | <b>cbcS</b>                                                                       | part of Cbc4 complex (cbcSTS)                                                          | OM                  | 4                  | GSU0068                                      |
| 2461                        | <b>cbcX</b>                                                                       | part of Cbc3 complex (CbcXWY)                                                          | -                   | 5                  | GSU1648                                      |
| 4316                        | <b>ccoO</b>                                                                       | cytochrome c oxidase cbb3-type subunit II; K00405/COG2993                              | IM                  | 2                  |                                              |
| 6764                        | <b>ccoO</b>                                                                       | cytochrome c oxidase cbb3-type subunit II; K00405/COG2993                              | IM                  | 2                  |                                              |
| 1899                        | <b>ccoP</b>                                                                       | cytochrome c oxidase cbb3-type subunit III; K00406/COG2010                             | IM                  | 1                  | GSU2513                                      |
| Gmet_1088                   | <b>ccoP</b>                                                                       | cytochrome c oxidase cbb3-type subunit III; K00406/COG2010                             | IM                  | 1                  |                                              |
| 2564                        | <b>coxB</b>                                                                       | cytochrome c oxidase subunit II [EC:1.9.3.1]; K02275/COG1622                           | IM                  | 1                  | GSU0222                                      |
| 3257                        | <b>cycC</b>                                                                       | Cytochrome c; COG3258                                                                  | -                   | 1                  | GSU1740                                      |
| <b>cymA</b>                 | <b>cymA</b>                                                                       | cytoplasmic membrane-bound, tetraheme cytochrome c                                     | IM                  | 4                  |                                              |
| 1654                        | <b>extCF</b>                                                                      | part of ExtABCD conduit                                                                | OM                  | 5                  | GSU2643/GSU2725                              |
| 3397                        | <b>extD</b>                                                                       | lipoprotein attachment site, part of ExtABCD conduit                                   | OM                  | 6                  | GSU2642                                      |
| 3244                        | <b>extG</b>                                                                       | part of ExtEFG conduit                                                                 | OM/PP               | 3                  | GSU2724                                      |
| 71                          | <b>extK</b>                                                                       | Outer membrane cytochrome, part of extHIJKL conduit                                    | OM                  | 5                  | GSU2937                                      |
| 2452                        | <b>extQ</b>                                                                       | Outer membrane partner to extR                                                         | OM                  | 23                 | GSU2495                                      |
| 2451                        | <b>extR</b>                                                                       | part of ExtQR conduit                                                                  | PP?                 | 16                 | GSU2494                                      |
| 3236                        | <b>extT</b>                                                                       | part of ExtTUVW conduit                                                                | PP?                 | 4                  | GSU3223                                      |
| 3233                        | <b>extW</b>                                                                       | part of ExtTUVW conduit                                                                | OM                  | 7                  | GSU3226                                      |
| 2277                        | <b>frdA</b>                                                                       | fumarate reductase flavoprotein subunit [EC:1.3.99.1]; K00244/COG1053                  | IM                  | 4                  |                                              |
| 2555                        | <b>frt</b>                                                                        | high-affinity iron transporter; K07243/COG2010                                         | -                   | 1                  |                                              |
| 1950                        | <b>hsc</b>                                                                        | Cytochrome c peroxidase; COG1858                                                       | IM                  | 2                  |                                              |
| 1674                        | <b>imcH</b>                                                                       | membrane-bound tetraheme cytochrome c (Nitrate/TMAO reductases); COG3005               | IM                  | 4                  | GSU3259                                      |
| 4751                        | <b>macA</b>                                                                       | cytochrome c peroxidase [EC:1.11.1.5]; K00428/COG1858                                  | IM                  | 2                  | GSU2813                                      |
| <b>mtrA</b>                 | <b>mtrA</b>                                                                       | decaheme cytochrome c                                                                  | OM                  | 12                 |                                              |
| 7063                        | <b>napB</b>                                                                       | cytochrome c-type protein NapB; K02568/COG3043                                         | -                   | 2                  |                                              |
| 2179                        | <b>ctcB</b>                                                                       | cytochrome c (Membrane bound?)                                                         | IM/OM               | 6                  | GSU0616                                      |
| 7567                        | <b>napB</b>                                                                       | cytochrome c-type protein NapB; K02568/COG3043                                         | -                   | 2                  |                                              |
| 5750                        | <b>napC</b>                                                                       | Nitrate/TMAO reductases, membrane-bound tetraheme cytochrome c subunit; COG3005        | IM                  | 6                  |                                              |
| 2192                        | <b>ctcA</b>                                                                       | tetra/tri-heme cytochrome c (Membrane bound?)                                          | IM/OM               | 3                  | GSU3221                                      |
| 2225                        | <b>ctcC</b>                                                                       | cytochrome c (Membrane bound?)                                                         | IM/OM               | 5                  | GSU2801                                      |
| 6771                        | <b>norC</b>                                                                       | nitric oxide reductase subunit C; K02305/COG02010                                      | -                   | 2                  |                                              |
| 1695                        | <b>nrfA</b>                                                                       | periplasmic cytochrome c552 (nitrite reductase); COG3303                               | PP                  | 5                  | GSU0357                                      |
| 88                          | <b>nrfA</b>                                                                       | periplasmic cytochrome c552 (nitrite reductase); K03385/COG3303                        | PP                  | 4                  | GSU3154                                      |
| 2126                        | <b>nrfH</b>                                                                       | cytochrome c nitrite reductase small subunit; K15876/COG3005                           | PP                  | 4                  | GSU3155                                      |
| 4675                        | <b>omcF</b>                                                                       |                                                                                        | OM                  | 1                  | GSU2432                                      |
| 148                         | <b>omcG</b>                                                                       | outer membrane multi-heme cytochrome c                                                 | OM                  | 14                 | GSU0702/GSU2882                              |
| 23                          | <b>omcH</b>                                                                       | outer membrane multi-heme cytochrome c                                                 | OM                  | 24                 | GSU2883/GSU2884/GSU2912                      |
| 1679                        | <b>omcI</b>                                                                       | outer membrane multi-heme cytochrome c                                                 | OM                  | 7                  | GSU1228                                      |
| 4623                        | <b>omcK</b>                                                                       | outer membrane multi-heme cytochrome c                                                 | OM                  | 10                 | GSU2203                                      |
| 3250                        | <b>omcM</b>                                                                       |                                                                                        | OM                  | 6                  | GSU2294                                      |
| 47                          | <b>omcN</b>                                                                       | high-molecular-weight cytochrome c                                                     | OM                  | 27                 | GSU2898                                      |
| 3422                        | <b>omcP</b>                                                                       | outer membrane multi-heme cytochrome c                                                 | OM                  | 3                  | GSU2913                                      |
| 3877                        | <b>omcT</b>                                                                       |                                                                                        | OM                  | 6                  |                                              |
| 45                          | <b>pgcA</b>                                                                       | periplasmic or secreted multi-heme cytochrome c                                        | OM                  | 2                  | GSU1761                                      |
| 3303                        | <b>ppcC</b>                                                                       | cytochrome c3                                                                          | PP                  | 3                  | GSU0365                                      |
| 3948                        | <b>ppcD</b>                                                                       | cytochrome c3                                                                          | PP                  | 3                  | GSU1024                                      |
| 3353                        | <b>ppcE</b>                                                                       | cytochrome c3                                                                          | PP                  | 3                  | GSU1760                                      |
| 2610                        | <b>ctcD</b>                                                                       | cytochrome c                                                                           | -                   | 2                  | GSU1785                                      |
| 4800                        | <b>ppcH</b>                                                                       | periplasmic cytochrome c                                                               | PP                  | 1                  | GSU3274                                      |
| 4297                        |                                                                                   | cytochrome b5                                                                          | -                   | 1                  |                                              |
| 7346                        |                                                                                   | cytochrome b5                                                                          | -                   | 1                  |                                              |
| 6817                        |                                                                                   | cytochrome c class I                                                                   | -                   | 1                  |                                              |
| 3237                        |                                                                                   | cytochrome c family protein                                                            | -                   | 12                 | GSU3218                                      |
| 3749                        |                                                                                   | cytochrome c family protein                                                            | -                   | 6                  |                                              |
| 3803                        |                                                                                   | cytochrome C family protein                                                            | OM                  | 30                 |                                              |
| 5965                        |                                                                                   | cytochrome C family protein                                                            | -                   | 10                 |                                              |

Supplementary Table S18. *Continued.*

|                |                                                  |    |    |         |
|----------------|--------------------------------------------------|----|----|---------|
| 7055           | cytochrome C family protein                      | -  | 21 |         |
| 7900           | cytochrome c, class I                            | -  | 1  |         |
| 3677           | Cytochrome c, mono- and diheme variants; COG2010 | -  | 2  |         |
| 3984           | cytochrome c3                                    | -  | 1  |         |
| 7405           | fatty acid cistrans isomerase                    | -  | 1  |         |
| 2752           | FOG: PKD repeat; COG3291                         | PP | 6  | GSU3233 |
| 31             | high-molecular-weight cytochrome c               | OM | 16 | GSU2899 |
| 1295           | histidine kinase, HAMP region domain protein     | -  | 1  |         |
| 1041           | thiol:disulfide interchange protein DsbC         | -  | 1  |         |
| 2778           | type II secretion system protein E               | -  | 1  |         |
| 243            |                                                  | -  | 2  |         |
| 256            |                                                  | -  | 8  |         |
| 727            |                                                  | -  | 1  |         |
| 1819           |                                                  | -  | 8  | GSU3137 |
| 1961           |                                                  | -  | 1  |         |
| 2014           |                                                  | -  | 2  | GSU2927 |
| 2106           |                                                  | -  | 2  | GSU3332 |
| 2180           |                                                  | -  | 7  | GSU0615 |
| 2189           |                                                  | -  | 27 | GSU2210 |
| 2245           |                                                  | -  | 3  | GSU1787 |
| 2246           |                                                  | -  | 6  | GSU1786 |
| 2258           |                                                  | -  | 3  | GSU0105 |
| 2274           |                                                  | -  | 8  |         |
| 2287           |                                                  | OM | 10 |         |
| 2320           |                                                  | OM | 7  | GSU3228 |
| 2448           |                                                  | -  | 22 |         |
| 2498           |                                                  | PP | 5  |         |
| 2554           |                                                  | -  | 5  |         |
| 2584           |                                                  | -  | 3  | GSU3214 |
| 2593           |                                                  | -  | 3  | GSU0533 |
| 2624           |                                                  | -  | 23 | GSU2887 |
| 2732           |                                                  | OM | 9  |         |
| 2751           |                                                  | -  | 1  |         |
| 2792           |                                                  | -  | 1  |         |
| 2827           |                                                  | -  | 1  |         |
| 3111           |                                                  | -  | 2  |         |
| 3115           |                                                  | -  | 1  |         |
| 3242           |                                                  | -  | 2  | GSU2767 |
| 3391           |                                                  | -  | 1  | GSU2515 |
| 3413           |                                                  | -  | 7  |         |
| 3428           |                                                  | -  | 2  |         |
| 3567           |                                                  | -  | 1  | GSU1397 |
| 3577           |                                                  | -  | 1  | GSU0935 |
| 3587           |                                                  | -  | 3  |         |
| 3597           |                                                  | -  | 4  |         |
| 3695           |                                                  | -  | 6  |         |
| 3792           |                                                  | -  | 3  |         |
| 3907           |                                                  | -  | 1  |         |
| 3938           |                                                  | -  | 4  |         |
| 3939           |                                                  | -  | 1  |         |
| 4042           |                                                  | -  | 4  |         |
| 4211           |                                                  | -  | 2  |         |
| 4218           |                                                  | -  | 6  | GSU2501 |
| 4876           |                                                  | -  | 13 |         |
| 5312           |                                                  | OM | 12 |         |
| 5331           |                                                  | -  | 6  |         |
| 5408           |                                                  | -  | 10 |         |
| 5415           |                                                  | -  | 1  |         |
| 5502           |                                                  | -  | 6  |         |
| 5753           |                                                  | -  | 22 |         |
| 6017           |                                                  | -  | 6  |         |
| 6133           |                                                  | -  | 23 |         |
| 6215           |                                                  | -  | 1  |         |
| 6310           |                                                  | -  | 1  |         |
| 6456           |                                                  | -  | 4  |         |
| 6516           |                                                  | -  | 8  |         |
| 6720           |                                                  | -  | 5  |         |
| 6738           |                                                  | -  | 8  |         |
| 7072           |                                                  | -  | 2  |         |
| 7436           |                                                  | -  | 1  |         |
| 7513           |                                                  | -  | 4  |         |
| 7534           |                                                  | -  | 4  |         |
| 8012           |                                                  | -  | 3  |         |
| Gbem_2674      |                                                  | -  | 5  |         |
| GeobDRAFT_1916 |                                                  | -  | -  |         |
| GeobDRAFT_2843 |                                                  | -  | -  |         |
| Glov_1156      |                                                  | -  | -  |         |
| Glov_1291      |                                                  | -  | -  |         |
| Glov_2299      |                                                  | -  | -  |         |
| Glov_2846      |                                                  | -  | -  |         |
| Glov_3546      |                                                  | -  | -  |         |
| Gmet_0910      |                                                  | -  | -  |         |
| Gmet_1019      |                                                  | -  | -  |         |
| Gmet_1647      |                                                  | -  | -  |         |
| Gmet_1703      |                                                  | -  | 4  |         |
| Gmet_2156      |                                                  | -  | 9  |         |
| GSU1257        |                                                  | -  | -  |         |
| GSU2811        |                                                  | -  | -  |         |
| Gura_0672      |                                                  | -  | -  |         |
| Gura_0849      |                                                  | -  | -  |         |
| Gura_1317      |                                                  | -  | -  |         |

<sup>a</sup> c-type cytochrome families assigned by Bulter et al. (BMC Genomics 11, 40, (2010).)

Supplementary Table S19. Potential conductive pili (e-pili) and flp pillus observed in the metagenomes and their gene expression profiles after stimuli application.

| Bin-genom ID | Contig ID     | ORF begin | ORF end | Strand | type of pillus | Gene expression level (mRNA <sub>RPKM</sub> ) |          |                          |                         |            | Ave DNA <sub>RPKM</sub> |
|--------------|---------------|-----------|---------|--------|----------------|-----------------------------------------------|----------|--------------------------|-------------------------|------------|-------------------------|
|              |               |           |         |        |                | Con1 SP                                       | Con2 SP+ | Con3 OC <sub>short</sub> | Con4 OC <sub>long</sub> | Con5 AcPro |                         |
| H1geoB       | H_contig_339  | 4983      | 5192    | +      | PilA           | 2896                                          | 2153     | 1846                     | 163                     | 2178       | 44                      |
| H1geoB       | H_contig_2577 | 1068      | 1292    | +      | PilA           | 3                                             | 4        | 0                        | 0                       | 0          | 51                      |
| H1geoC       | H_contig_394  | 4885      | 5091    | +      | PilA           | 647                                           | 577      | 532                      | 79                      | 869        | 37                      |
| H1geoC       | H_contig_2561 | 1073      | 1297    | +      | PilA           | 0                                             | 0        | 0                        | 0                       | 0          | 39                      |
| H1geoD       | H_contig_980  | 542       | 751     | -      | PilA           | 41                                            | 41       | 39                       | 13                      | 203        | 11                      |
| H1geoD       | H_contig_980  | 944       | 1144    | -      | PilA           | 3                                             | 0        | 0                        | 0                       | 0          | 13                      |
| H1geoD       | H_contig_1782 | 1806      | 2030    | +      | PilA           | 0                                             | 0        | 0                        | 0                       | 0          | 13                      |
| H2geo        | H_contig_79   | 50121     | 50741   | +      | PilA           | 619                                           | 1051     | 627                      | 310                     | 1104       | 36                      |
| H5geo        | H_contig_77   | 41085     | 41309   | -      | PilA           | 127                                           | 166      | 112                      | 41                      | 34         | 20                      |
| H7geo        | H_contig_414  | 11860     | 12450   | +      | PilA           | 314                                           | 260      | 352                      | 777                     | 196        | 9                       |
| M1geoB       | M_contig_67   | 4709      | 4948    | -      | PilA           | 3108                                          | 1738     | 726                      | 762                     | 1200       | 91                      |
| M1geoC       | M_contig_1602 | 1         | 204     | +      | PilA           | 1752                                          | 1951     | 922                      | 942                     | 1020       | 33                      |
| M1geoD       | M_contig_143  | 7458      | 7754    | -      | PilA           | 582                                           | 541      | 90                       | 34                      | 0          | 17                      |
| M4geo        | M_contig_387  | 67409     | 68029   | -      | PilA           | 87                                            | 264      | 145                      | 60                      | 396        | 14                      |
| M7geo        | M_contig_1802 | 73694     | 73918   | +      | PilA           | 11                                            | 35       | 11                       | 0                       | 116        | 4                       |
| M17geo       | M_contig_5885 | 6587      | 6796    | +      | PilA           | 0                                             | 8        | 0                        | 0                       | 0          | 2                       |
| M17geo       | M_contig_5885 | 6194      | 6394    | +      | PilA           | 0                                             | 0        | 0                        | 0                       | 0          | 1                       |
| M17geo       | M_contig_6413 | 3304      | 3528    | +      | PilA           | 0                                             | 0        | 0                        | 0                       | 0          | 2                       |
| L1geo        | L_contig_24   | 565101    | 565340  | -      | PilA           | 1148                                          | 812      | 448                      | 883                     | 1243       | 66                      |
| L7ppro       | L_contig_166  | 27743     | 27967   | -      | PilA           | 155                                           | 481      | 229                      | 423                     | 358        | 7                       |
| L10gmet      | L_contig_302  | 83537     | 83749   | +      | PilA           | 40                                            | 12       | 9                        | 19                      | 0          | 4                       |
| H1geoD       | H_contig_336  | 3165      | 3362    | +      | Flp            | 233                                           | 175      | 103                      | 780                     | 904        | 13                      |
| H2geo        | H_contig_67   | 104576    | 104779  | +      | Flp            | 456                                           | 397      | 161                      | 176                     | 779        | 39                      |
| H6fir        | H_contig_3091 | 5088      | 5309    | +      | Flp            | 4                                             | 0        | 0                        | 0                       | 0          | 10                      |
| M3ppro       | M_contig_212  | 116401    | 116583  | +      | Flp            | 32                                            | 91       | 121                      | 59                      | 137        | 15                      |
| M4geo        | M_contig_21   | 104556    | 104759  | +      | Flp            | 58                                            | 76       | 19                       | 27                      | 183        | 13                      |
| M7geo        | M_contig_2058 | 45068     | 45262   | +      | Flp            | 0                                             | 0        | 0                        | 0                       | 0          | 5                       |
| M15fir       | M_contig_1722 | 19947     | 20141   | -      | Flp            | 0                                             | 0        | 0                        | 0                       | 38         | 2                       |
| M17geo       | M_contig_3131 | 8480      | 8677    | +      | Flp            | 16                                            | 9        | 6                        | 0                       | 102        | 2                       |
