# Supplementary material for: Comparative metatranscriptomics reveals extracellular electron transfer pathways conferring microbial adaptivity to surface redox potential changes
Source: ISME J. 2018 Jul 26;12(12):2844–63. doi: 10.1038/s41396-018-0238-2 (PMC6246609; doi:10.1038/s41396-018-0238-2)
Supplement: Supplementary file 2 — Datasets [file 41396_2018_238_MOESM2_ESM.xlsx]

## Sheet: D1. SPH change
Supplementary Data 1. List of CDSs that showed a significant response (5-times change and mRNA-RPKM after/before stimulus over 50) to the given stimulus in SP-H community.
Bin-genom ID	Contig ID	ORF begin	ORF end	Strand	Length	KO	KO description blue letters: key marker genes described in Fig.5	CytC Family ID (No. CXXCH domain)	Gene expression level (mRNARPKM)					Ave DNARPKM	Gene expression dynamics *CDSs counted for Fig. 4 are colored and labeled
									Con1 SP	Con2 SP+	Con3 OCshort	Con4 OClong	Con5 AcPro		SP+/SP	SP+ or SP	OClong/SP	EET or OC	AcPro/SP	Suc or AcPro
H1geoA	H_contig_1004	3	350	-	116	K05833	ABC.X4.A; putative ABC transport system ATP-binding protein		65.9381	28.7452	34.0534	0	100.385	102.16	0.435942		ZERO	EET	1.52241
H1geoA	H_contig_1004	1322	2317	-	332	K01989	ABC.X4.S; putative ABC transport system substrate-binding protein		88.9767	82.174	133.26	17.7173	377.722	100.558	0.923545		0.199123	EET	4.24518
H1geoA	H_contig_1023	319	663	+	115	K02503	HINT1, hinT, hit; histidine triad (HIT) family protein		55.044	65.898	85.8738	3.6535	147.992	83.7985	1.19719		0.0663742	EET	2.68862
H1geoA	H_contig_1023	713	1210	+	166				104.865	87.6523	76.1483	2.53104	161.881	90.276	0.835855		0.0241361	EET	1.5437
H1geoA	H_contig_1023	1292	2065	+	258	K13292	lgt, umpA; phosphatidylglycerol:prolipoprotein diacylglycerol transferase [EC:2.-.-.-]		55.204	46.997	41.3392	8.14249	52.078	89.794	0.851334		0.147498	EET	0.943374
H1geoA	H_contig_1028	3	1604	+	534	K02453	gspD; general secretion pathway protein D		50.8736	78.3372	73.2339	3.93401	110.71	82.4311	1.53984		0.0773292	EET	2.17617
H1geoA	H_contig_1028	1623	2123	+	167	K02456	gspG; general secretion pathway protein G		52.1187	58.0849	33.1154	0	48.2735	70.045	1.11447		ZERO	EET	0.926222
H1geoA	H_contig_1028	4167	5363	+	399	K01417	E3.4.24.-; putative zinc metalloprotease [EC:3.4.24.-]		62.1371	56.2197	38.6109	9.47713	53.8792	87.6932	0.904769		0.15252	EET	0.867101
H1geoA	H_contig_1028	5400	6206	+	269	K03797	E3.4.21.102, prc, ctpA; carboxyl-terminal processing protease [EC:3.4.21.102]		343.172	277.212	280.479	65.6	319.67	85.5451	0.807794		0.191158	EET	0.931515
H1geoA	H_contig_103	6199	6624	+	142				5.57223	8.53889	2.78183	23.6706	157.701	80.8127	1.5324		4.24795		28.3012	AcPro
H1geoA	H_contig_103	10669	10866	+	66				3.99625	4.59289	0	50.9276	67.8592	89.2987	1.1493		12.7439	OC	16.9807	AcPro
H1geoA	H_contig_1032	15349	16155	-	269	K01423	E3.4.-.-		22.5513	28.172	32.3064	70.2857	116.546	85.0985	1.24924		3.1167		5.16805	AcPro
H1geoA	H_contig_1039	1289	2539	+	417	K01647	CS, gltA; citrate synthase [EC:2.3.3.1]		77.7974	154.11	264.294	198.489	5209.05	89.3172	1.98091		2.55136		66.9566	AcPro
H1geoA	H_contig_1044	1430	2806	+	459	K00104	glcD; glycolate oxidase [EC:1.1.3.15]		58.037	71.3249	50.7759	7.32292	54.6422	90.8749	1.22896		0.126177	EET	0.941506
H1geoA	H_contig_1044	2917	4197	+	427	K11473	glcF; glycolate oxidase iron-sulfur subunit		53.7388	73.1205	62.9071	2.95189	48.2484	91.8408	1.36067		0.0549304	EET	0.897832
H1geoA	H_contig_1044	4812	6536	+	575	K01966	PCCB, pccB; propionyl-CoA carboxylase beta chain [EC:6.4.1.3]		16.9719	11.0709	28.1666	5.1149	115.278	106.921	0.652306		0.301375		6.79229	AcPro
H1geoA	H_contig_1044	6593	9583	+	997	K01965	PCCA, pccA; propionyl-CoA carboxylase alpha chain [EC:6.4.1.3]		19.0473	25.5396	38.4322	5.89984	130.273	109.394	1.34085		0.309746		6.83946	AcPro
H1geoA	H_contig_1044	9694	9897	-	68				671.017	534.937	348.547	86.502	92.2087	94.0407	0.797203		0.128912	EET	0.137416	Suc
H1geoA	H_contig_1044	10313	11965	+	551	K01848	E5.4.99.2A, mcmA1; methylmalonyl-CoA mutase, N-terminal domain [EC:5.4.99.2]		22.9766	23.6563	25.8089	10.6754	238.973	99.6276	1.02958		0.46462		10.4007	AcPro
H1geoA	H_contig_1044	12224	12634	+	137	K05606	MCEE, epi; methylmalonyl-CoA/ethylmalonyl-CoA epimerase [EC:5.1.99.1]		0	6.6379	11.5334	18.4008	52.3061	71.2461	∞		∞		∞	AcPro
H1geoA	H_contig_1067	3	224	+	74	K03406	mcp; methyl-accepting chemotaxis protein		149.697	172.047	133.453	5.67774	242.092	89.5355	1.1493		0.0379281	EET	1.61721
H1geoA	H_contig_1067	388	1194	+	269	K01695	trpA; tryptophan synthase alpha chain [EC:4.2.1.20]		57.849	68.7397	64.6128	3.12381	59.9381	87.6384	1.18826		0.0539994	EET	1.03611
H1geoA	H_contig_1067	1326	2174	+	283	K01963	accD; acetyl-CoA carboxylase carboxyl transferase subunit beta [EC:6.4.1.2]		126.75	130.678	139.583	1.48464	215.231	100.176	1.03099		0.0117131	EET	1.69807
H1geoA	H_contig_1079	1	528	+	176	K00566	mnmA, trmU, TRMU; tRNA-specific 2-thiouridylase [EC:2.8.1.-]		50.9521	49.9477	24.6887	2.38723	40.7155	86.1983	0.980286		0.0468524	EET	0.799093
H1geoA	H_contig_1086	96	734	+	213	K00765	hisG; ATP phosphoribosyltransferase [EC:2.4.2.17]		73.0582	55.5028	55.6365	3.94509	84.1072	102.636	0.759707		0.0539994	EET	1.15124
H1geoA	H_contig_1091	1471	1923	+	151	K01802	E5.2.1.8; peptidylprolyl isomerase [EC:5.2.1.8]		99.5621	100.374	47.0884	19.4773	172.03	101.939	1.00816		0.195629	EET	1.72786
H1geoA	H_contig_1091	2001	2477	-	159				58.0587	28.5972	37.266	31.7096	439.42	106.407	0.492557		0.546165		7.56856	AcPro
H1geoA	H_contig_1092	1843	2532	+	230	K02108	ATPF0A, atpB; F-type H+-transporting ATPase subunit a [EC:3.6.3.14]		236.23	254.366	214.684	21.921	354.402	91.0515	1.07677		0.092795	EET	1.50024
H1geoA	H_contig_1092	2672	2947	+	92	K02110	ATPF0C, atpE; F-type H+-transporting ATPase subunit c [EC:3.6.3.14]		584.842	467.876	502.362	54.8025	856.796	95.2149	0.800003		0.0937048	EET	1.465
H1geoA	H_contig_110	1	138	+	46	K03408	cheW; purine-binding chemotaxis protein CheW		86.0062	32.949	34.3495	0	19.4726	39.5971	0.3831		ZERO	EET	0.22641
H1geoA	H_contig_110	361	2196	+	612	K03407	cheA; two-component system, chemotaxis family, sensor kinase CheA [EC:2.7.13.3]		81.022	55.4749	31.6274	14.417	27.809	57.9556	0.68469		0.177939	EET	0.343228
H1geoA	H_contig_1115	1915	2235	+	107	K01269	E3.4.11.-; aminopeptidase [EC:3.4.11.-]		54.2294	70.8249	84.9107	7.85332	184.171	95.2961	1.30602		0.144817	EET	3.39615
H1geoA	H_contig_1125	3	266	-	88			ppcL (2)	47.955	75.7827	22.4443	9.54892	427.513	74.8079	1.58029		0.199123		8.91489	AcPro
H1geoA	H_contig_1128	2007	2624	-	206	K03801	lipB; lipoyl(octanoyl) transferase [EC:2.3.1.181]		16.6446	20.6011	32.5987	16.3166	130.448	77.6888	1.23771		0.980296		7.83726	AcPro
H1geoA	H_contig_1128	2626	4032	-	469	K00382	DLD, lpd, pdhD; dihydrolipoamide dehydrogenase [EC:1.8.1.4]		37.6789	51.7067	51.3778	14.3336	200.539	98.4987	1.3723		0.380414		5.32232	AcPro
H1geoA	H_contig_1128	9918	11993	-	692	K08300	rne; ribonuclease E [EC:3.1.26.12]		64.7946	68.7739	61.0796	9.71451	148.859	84.3271	1.06141		0.149928	EET	2.29739
H1geoA	H_contig_1133	3	548	-	182	K00936	E2.7.3.-	1295 (1)	53.62	38.3077	39.0679	4.61706	63.9815	101.081	0.71443		0.0861071	EET	1.19324
H1geoA	H_contig_1133	748	1380	-	211				85.0007	81.8884	69.2688	7.96498	97.6401	94.7631	0.963384		0.0937048	EET	1.1487
H1geoA	H_contig_1133	1377	2309	-	311	K00615	E2.2.1.1, tktA, tktB; transketolase [EC:2.2.1.1]		167.919	212.484	163.851	13.5097	135.369	94.7871	1.26539		0.0804536	EET	0.806156
H1geoA	H_contig_1133	2398	3222	-	275	K00615	E2.2.1.1, tktA, tktB; transketolase [EC:2.2.1.1]		172.638	209.436	180.991	7.63914	237.779	107.521	1.21315		0.0442495	EET	1.37733
H1geoA	H_contig_1133	3247	3726	-	160				67.5865	62.5207	32.0953	7.87786	55.9839	96.2516	0.925047		0.11656	EET	0.828329
H1geoA	H_contig_114	3	365	-	121	K07792	dcuB; anaerobic C4-dicarboxylate transporter DcuB		1229.39	1618.37	1792.28	2215.35	244.293	84.1689	1.3164		1.80199		0.198711	Suc
H1geoA	H_contig_1141	2624	3703	-	360	K02453	gspD; general secretion pathway protein D		55.681	65.6783	43.8911	7.00254	87.086	61.0637	1.17955		0.125762	EET	1.56402
H1geoA	H_contig_1156	3	389	-	129	K00344	E1.6.5.5, qor; NADPH2:quinone reductase [EC:1.6.5.5]		20.4459	30.5481	24.4973	35.827	104.156	81.0999	1.49409		1.75228		5.09422	AcPro
H1geoA	H_contig_1156	1199	1390	-	64				61.8169	75.7827	203.682	131.298	377.891	83.5676	1.22592		2.12398		6.11306	AcPro
H1geoA	H_contig_1156	1443	3032	-	530	K01610	E4.1.1.49, pckA; phosphoenolpyruvate carboxykinase (ATP) [EC:4.1.1.49]		33.3423	58.9103	57.3896	25.3677	187.599	89.9533	1.76684		0.760827		5.62645	AcPro
H1geoA	H_contig_1156	3171	5111	-	647	K01596	E4.1.1.32, pckA, PEPCK; phosphoenolpyruvate carboxykinase (GTP) [EC:4.1.1.32]		303.702	245.972	360.219	34.4174	952.504	102.173	0.80991		0.113326	EET	3.13631
H1geoA	H_contig_1156	5764	6834	-	357	K00839	E2.6.1.-B; aminotransferase [EC:2.6.1.-]		101.955	69.6267	53.1119	3.53069	145.527	100.527	0.682918		0.03463	EET	1.42737
H1geoA	H_contig_116	3	614	+	204	K03634	lolA; outer membrane lipoprotein carrier protein		62.0594	47.5499	38.7274	2.05957	100.99	103.776	0.766201		0.0331871	EET	1.62732
H1geoA	H_contig_116	1148	2494	+	449	K14441	rimO; ribosomal protein S12 methylthiotransferase [EC:2.-.-.-]		58.1547	37.807	37.8304	9.35752	79.7988	105.852	0.65011		0.160907	EET	1.37218
H1geoA	H_contig_116	2601	2999	+	133	K06204	dksA; DnaK suppressor protein		142.783	75.2129	23.7606	28.4314	228.987	90.0722	0.526763		0.199123	EET	1.60374
H1geoA	H_contig_116	9512	10123	+	204	K01077	E3.1.3.1, phoA, phoB; alkaline phosphatase [EC:3.1.3.1]		78.8671	96.5858	54.2184	8.23829	57.0816	94.4626	1.22466		0.104458	EET	0.723769
H1geoA	H_contig_116	10226	10870	-	215	K00616	E2.2.1.2, talA, talB; transaldolase [EC:2.2.1.2]		333.677	401.824	240.686	7.81679	216.644	99.6594	1.20423		0.0234262	EET	0.649263
H1geoA	H_contig_116	10890	11126	-	79				66.7727	46.0452	20.001	10.6368	102.047	82.8317	0.68958		0.159298	EET	1.52827
H1geoA	H_contig_116	11135	11623	-	163	K00950	folK; 2-amino-4-hydroxy-6-hydroxymethyldihydropteridine diphosphokinase [EC:2.7.6.3]		63.1064	79.967	63.0092	7.73287	109.907	90.4284	1.26718		0.122537	EET	1.74161
H1geoA	H_contig_116	16927	18864	+	646	K12600	SKI3, TTC37; superkiller protein 3		54.3019	44.578	44.0269	3.90235	80.4226	79.4629	0.820929		0.0718638	EET	1.48103
H1geoA	H_contig_1160	3	1076	-	358	K00789	metK; S-adenosylmethionine synthetase [EC:2.5.1.6]		131.139	91.4473	78.3418	9.38888	237.697	106.271	0.697329		0.0715947	EET	1.81255
H1geoA	H_contig_1160	1921	2436	-	172	K03768	PPIB, ppiB; peptidyl-prolyl cis-trans isomerase B (cyclophilin B) [EC:5.2.1.8]		108.874	105.743	98.7549	17.0992	229.143	105.665	0.97124		0.157055	EET	2.10465
H1geoA	H_contig_1160	16933	17409	-	159	K01518	E3.6.1.17; bis(5'-nucleosidyl)-tetraphosphatase [EC:3.6.1.17]		14.9294	22.8778	7.4532	18.4973	123.939	85.5649	1.5324		1.23899		8.30169	AcPro
H1geoA	H_contig_1180	610	1641	-	344	K03769	ppiC; peptidyl-prolyl cis-trans isomerase C [EC:5.2.1.8]		121.909	84.5946	75.7886	10.9924	166.65	96.2035	0.693917		0.0901688	EET	1.367
H1geoA	H_contig_1182	4676	5161	-	162	K14393	actP; cation/acetate symporter		481.918	205.83	260.908	41.4965	132.702	83.498	0.427105		0.0861071	EET	0.275363
H1geoA	H_contig_1182	5360	6835	-	492	K14393	actP; cation/acetate symporter		254.103	96.7307	130.87	17.9333	101.954	100.942	0.380676		0.0705751	EET	0.401233
H1geoA	H_contig_1182	6852	7163	-	104				106.515	81.6121	34.1844	12.1198	77.5161	104.429	0.766201		0.113784	EET	0.727746
H1geoA	H_contig_1186	5782	5973	-	64	K01821	E5.3.2.-; 4-oxalocrotonate tautomerase [EC:5.3.2.-]		74.1803	33.1549	18.5165	13.1298	55.9839	89.9421	0.44695		0.176998	EET	0.754699
H1geoA	H_contig_1193	2	1081	-	360				61.5422	98.5175	62.5447	4.66836	109.48	84.9968	1.60081		0.0758563	EET	1.77893
H1geoA	H_contig_1193	1266	1427	-	54				473.777	348.039	182.879	0	132.702	79.4347	0.734605		ZERO	EET	0.280095
H1geoA	H_contig_1194	95	1519	+	475	K04042	glmU; bifunctional UDP-N-acetylglucosamine pyrophosphorylase / Glucosamine-1-phosphate N-acetyltransferase [EC:2.7.7.23 2.3.1.157]		62.19	51.0536	23.2854	6.19172	58.4589	55.3691	0.820929		0.0995613	EET	0.940005
H1geoA	H_contig_1194	1607	3436	+	610	K00820	E2.6.1.16, glmS; glucosamine--fructose-6-phosphate aminotransferase (isomerizing) [EC:2.6.1.16]		72.64	77.522	62.8146	4.13265	107.195	98.4172	1.06721		0.0568922	EET	1.47571
H1geoA	H_contig_1194	7949	9181	+	411			Gbem_2674 (5)	9.626	10.3256	13.4557	5.11134	52.3061	87.4009	1.07268		0.530994		5.43384	AcPro
H1geoA	H_contig_1204	649	1194	+	182	K14127	mvhD, vhuD, vhcD; F420-non-reducing hydrogenase iron-sulfur subunit D [EC:1.12.99.-]		13.0427	19.9866	13.0226	2.30853	68.9032	96.1543	1.5324		0.176998		5.2829	AcPro
H1geoA	H_contig_1204	1286	2230	+	315	K00125	E1.2.1.2B2; formate dehydrogenase, beta subunit [EC:1.2.1.2]		13.3969	25.9826	31.3508	6.66909	88.1524	105.693	1.93945		0.497807		6.58003	AcPro
H1geoA	H_contig_1216	2185	3021	+	279	K05966	citG; triphosphoribosyl-dephospho-CoA synthase [EC:2.4.2.52]		103.988	103.217	49.5544	4.51777	48.1582	89.3488	0.992578		0.043445	EET	0.463111
H1geoA	H_contig_1216	6340	7689	+	450	K00262	E1.4.1.4, gdhA; glutamate dehydrogenase (NADP+) [EC:1.4.1.4]		152.976	224.317	131.673	14.9388	589.199	104.029	1.46635		0.097654	EET	3.85157
H1geoA	H_contig_1221	3070	5247	-	726	K03406	mcp; methyl-accepting chemotaxis protein		96.6365	37.5782	41.896	0.578723	1.2338	73.8579	0.388861		0.00598865	EET	0.0127675	Suc
H1geoA	H_contig_1222	453	746	-	98	K02398	flgM; negative regulator of flagellin synthesis FlgM		115.728	80.4224	108.832	12.8618	146.244	100.858	0.694926		0.111138	EET	1.26368
H1geoA	H_contig_1237	3	134	+	44				77.9268	48.2253	35.9109	0	20.3578	32.2754	0.618854		ZERO	EET	0.261242
H1geoA	H_contig_1237	4214	6991	+	926	K01870	IARS, ileS; isoleucyl-tRNA synthetase [EC:6.1.1.5]		65.7957	64.8163	51.617	6.3522	110.275	97.0019	0.985115		0.0965443	EET	1.67602
H1geoA	H_contig_1247	477	1775	-	433	K01939	E6.3.4.4, purA; adenylosuccinate synthase [EC:6.3.4.4]		190.657	164.517	161.474	5.82198	239.968	101.908	0.862894		0.0305364	EET	1.25864
H1geoA	H_contig_1247	1768	3087	-	440	K02502	hisZ; ATP phosphoribosyltransferase regulatory subunit		111.495	99.8954	45.7863	1.90978	140.469	106.692	0.89596		0.0171288	EET	1.25986
H1geoA	H_contig_1247	3200	4666	-	489				56.6339	84.9262	82.3967	3.43683	87.9256	96.6592	1.49956		0.060685	EET	1.55252
H1geoA	H_contig_1247	5175	5450	-	92				143.344	72.4878	103.049	246.611	1022.31	86.0037	0.505692		1.72042		7.13191	AcPro
H1geoA	H_contig_1247	5721	7031	-	437				302.38	195.613	204.289	32.6892	1346.69	87.6009	0.646912		0.108107	EET	4.45363
H1geoA	H_contig_1268	4039	5748	+	570	K03406	mcp; methyl-accepting chemotaxis protein		78.2002	42.0129	47.1251	5.15977	14.1433	84.9658	0.537247		0.0659815	EET	0.18086	Suc
H1geoA	H_contig_1273	3	1007	-	335	K01874	MARS, metG; methionyl-tRNA synthetase [EC:6.1.1.10]		59.8363	81.4381	76.6456	10.0335	69.5202	87.8242	1.36101		0.167682	EET	1.16184
H1geoA	H_contig_1273	2984	3646	-	221	K00943	E2.7.4.9, tmk; dTMP kinase [EC:2.7.4.9]		69.2201	52.122	35.7484	11.4069	113.488	95.0136	0.75299		0.164791	EET	1.63952
H1geoA	H_contig_1290	225	2324	-	700	K02355	fusA, GFM, EFG; elongation factor G		51.2433	67.5548	63.2031	11.4041	345.5	94.3812	1.31832		0.222549		6.74235	AcPro
H1geoA	H_contig_1295	117	962	-	282	K05807	bamD; outer membrane protein assembly factor BamD		106.623	115.018	89.6498	13.4091	238.229	101.562	1.07873		0.125762	EET	2.23431
H1geoA	H_contig_1295	2968	3681	-	238	K03646	tolA; colicin import membrane protein		56.5184	90.4298	63.0703	3.53069	127.963	98.5269	1.60001		0.0624699	EET	2.2641
H1geoA	H_contig_1295	3720	4139	-	140	K03560	tolR; biopolymer transport protein TolR		67.822	82.2783	50.7882	6.00218	83.176	102.502	1.21315		0.088499	EET	1.22639
H1geoA	H_contig_1295	4142	4708	-	189	K03562	tolQ; biopolymer transport protein TolQ		85.1264	107.459	77.3319	4.44606	232.229	101.929	1.26235		0.0522289	EET	2.72805
H1geoA	H_contig_1302	2	790	-	263	K04652	hypB; hydrogenase nickel incorporation protein HypB		63.1802	47.2561	43.5573	1.59754	44.2762	97.9435	0.747958		0.0252854	EET	0.700792
H1geoA	H_contig_1302	1777	3456	-	560	K06281	E1.12.99.6L; hydrogenase large subunit [EC:1.12.99.6]		51.3375	24.9	37.3858	3.75136	46.3866	105.748	0.485026		0.0730725	EET	0.903562
H1geoA	H_contig_1348	108	314	-	69				72.6274	57.1116	34.3495	85.2483	428.398	83.2942	0.786364		1.17378		5.89857	AcPro
H1geoA	H_contig_1348	2796	3374	+	193	K07275	ompW; outer membrane protein		99.7612	111.514	73.6824	15.2387	245.981	84.3526	1.11781		0.152752	EET	2.4657
H1geoA	H_contig_1352	1	633	+	211	K03407	cheA; two-component system, chemotaxis family, sensor kinase CheA [EC:2.7.13.3]		51.2504	77.5785	56.1639	1.99124	63.6783	96.3833	1.51371		0.0388532	EET	1.24249
H1geoA	H_contig_1361	1	459	+	153	K13542	cobA-hemD; uroporphyrinogen III methyltransferase / synthase [EC:2.1.1.107 4.2.1.75]		62.0594	53.4937	59.382	5.49219	64.3997	101.682	0.861976		0.088499	EET	1.03771
H1geoA	H_contig_1361	525	1433	+	303	K01698	hemB, ALAD; porphobilinogen synthase [EC:4.2.1.24]		237.638	291.126	264.65	8.31985	292.668	107.592	1.22508		0.0350106	EET	1.23157
H1geoA	H_contig_1381	2849	3037	+	63				20.9327	163.594	169.294	46.6836	113.745	82.5752	7.81525	SP+	2.23017		5.43384	AcPro
H1geoA	H_contig_1381	3139	3783	+	215				40.4829	164.96	202.103	64.4885	245.808	89.4234	4.07479		1.59298		6.0719	AcPro
H1geoA	H_contig_1381	3786	4307	+	174				31.8322	158.534	192.969	36.22	185.326	86.5341	4.9803		1.13784		5.82197	AcPro
H1geoA	H_contig_1381	4398	5006	+	203	K03561	exbB; biopolymer transport protein ExbB		77.9563	464.402	574.043	97.2767	600.103	90.8941	5.95721	SP+	1.24784		7.69793	AcPro
H1geoA	H_contig_1381	5042	5542	+	167				61.5948	408.41	402.116	72.9606	482.735	100.618	6.63058	SP+	1.18452		7.83726	AcPro
H1geoA	H_contig_1381	5557	6033	+	159				63.0351	326.009	330.425	60.7768	304.214	93.5766	5.17185	SP+	0.964173		4.8261
H1geoA	H_contig_1381	6044	7519	+	492				35.3814	246.448	224.808	48.6762	242.142	96.1237	6.96546	SP+	1.37576		6.84375	AcPro
H1geoA	H_contig_1381	7563	7868	+	102				36.2013	163.453	189.764	53.5489	263.453	94.6714	4.51511		1.4792		7.27746	AcPro
H1geoA	H_contig_1381	7865	8128	+	88				14.9859	134.342	134.666	33.4212	142.504	88.9037	8.96455	SP+	2.23017		9.50921	AcPro
H1geoA	H_contig_1381	8239	9030	+	264	K07275	ompW; outer membrane protein		95.9099	713.046	743.654	66.8425	637.877	89.306	7.43454	SP+	0.696929		6.65079	AcPro
H1geoA	H_contig_1381	9257	9766	+	170				77.5742	497.491	724.977	19.7719	537.445	86.8523	6.4131	SP+	0.254877		6.92814	AcPro
H1geoA	H_contig_1381	9815	9961	+	49				32.2962	414.485	459.512	34.2982	457.011	65.7482	12.8339	SP+	1.06199		14.1506	AcPro
H1geoA	H_contig_1395	1519	2964	-	482	K00134	GAPDH, gapA; glyceraldehyde 3-phosphate dehydrogenase [EC:1.2.1.12]		103.422	125.78	118.834	3.48674	104.07	106.549	1.21619		0.0337139	EET	1.00627
H1geoA	H_contig_1398	5637	6398	+	254	K02557	motB; chemotaxis protein MotB		84.11	44.1568	29.5487	13.2332	56.4247	93.9272	0.524989		0.157332	EET	0.670844
H1geoA	H_contig_14	3	587	-	195	K01417	E3.4.24.-; putative zinc metalloprotease [EC:3.4.24.-]		32.4618	26.4268	68.8752	23.7009	165.368	102.164	0.814088		0.730117		5.09422	AcPro
H1geoA	H_contig_14	600	1100	-	167				20.5316	19.9667	30.75	17.6112	128.729	93.8309	0.972485		0.857759		6.26981	AcPro
H1geoA	H_contig_1404	3	866	-	288	K00133	asd; aspartate-semialdehyde dehydrogenase [EC:1.2.1.11]		206.972	164.196	124.815	33.5538	289.25	90.6696	0.793323		0.162118	EET	1.39753
H1geoA	H_contig_1404	932	2020	-	363	K00052	leuB; 3-isopropylmalate dehydrogenase [EC:1.1.1.85]		146.045	103.549	72.9099	16.2042	192.473	106.551	0.709021		0.110954	EET	1.31791
H1geoA	H_contig_1417	3	107	-	35				0	0	0	0	51.1852	67.0628	∞		∞		∞	AcPro
H1geoA	H_contig_1427	1086	1328	+	81				22.7934	26.1965	39.0143	57.0578	199.054	86.1394	1.1493		2.50326		8.73295	AcPro
H1geoA	H_contig_1435	593	1066	-	158				81.7966	99.7645	67.5033	0	113.385	88.2326	1.21967		ZERO	EET	1.38618
H1geoA	H_contig_1444	81	509	+	143				5.53327	23.3177	46.9604	8.81439	50.1114	41.2545	4.2141		1.59298		9.05639	AcPro
H1geoA	H_contig_1449	3	443	-	147	K03168	topA; DNA topoisomerase I [EC:5.99.1.2]		57.4155	32.9938	40.3081	11.4327	158.43	80.4753	0.57465		0.199123	EET	2.75937
H1geoA	H_contig_1449	1568	2569	-	334				101.079	69.8834	80.4231	17.6112	174.321	85.472	0.691376		0.174232	EET	1.72461
H1geoA	H_contig_1452	2070	3632	+	521	K01067	E3.1.2.1, ACH1; acetyl-CoA hydrolase [EC:3.1.2.1]		23.2872	33.7458	67.4793	49.1925	1057.35	109.928	1.44912		2.11243		45.405	AcPro
H1geoA	H_contig_1452	5553	5861	+	103	K06940	K06940		23.0463	32.3732	38.3514	32.6332	139.144	75.8133	1.4047		1.41598		6.03759	AcPro
H1geoA	H_contig_146	66	2666	+	867	K00937	ppk; polyphosphate kinase [EC:2.7.4.1]		14.298	20.2786	14.5797	6.29987	86.7847	92.5776	1.41829		0.440612		6.06971	AcPro
H1geoA	H_contig_146	2779	3054	+	92				11.4675	3.2949	12.8811	18.2675	77.8906	88.4339	0.287325		1.59298		6.79229	AcPro
H1geoA	H_contig_1460	1479	2222	-	248	K00975	glgC; glucose-1-phosphate adenylyltransferase [EC:2.7.7.27]		136.13	89.228	60.5272	5.08249	223.935	102.771	0.655461		0.0373355	EET	1.64501
H1geoA	H_contig_1470	57	896	+	280	K00124	E1.2.1.2B1; formate dehydrogenase, beta subunit		515.259	232.761	318.837	18.0065	28.7917	98.334	0.451736		0.0349466	EET	0.0558781	Suc
H1geoA	H_contig_1470	897	2099	+	401	K00185	K00185; prokaryotic molybdopterin-containing oxidoreductase family, membrane subunit		560.391	267.602	355.616	6.28657	20.1039	92.8818	0.477526		0.0112182	EET	0.0358748	Suc
H1geoA	H_contig_1470	2194	3639	+	482	K02379	fdhD; FdhD protein		235.845	99.3665	112.277	6.97349	7.43354	86.4513	0.421321		0.0295681	EET	0.0315188	Suc
H1geoA	H_contig_1470	3680	3853	+	58	K03116	tatA; sec-independent protein translocase protein TatA		318.322	203.829	81.7282	21.732	15.4438	76.0282	0.640325		0.0682706	EET	0.0485164	Suc
H1geoA	H_contig_1470	3952	4503	+	184	K07216	K07216; hemerythrin		78.839	29.6541	49.3774	4.56688	29.209	80.5192	0.376135		0.0579266	EET	0.370489
H1geoA	H_contig_1470	5610	6461	+	284				35.2908	50.166	57.0275	133.147	205.011	84.8968	1.4215		3.77285		5.8092	AcPro
H1geoA	H_contig_1470	6465	6821	+	119				31.0297	45.8517	56.4314	95.3287	270.981	82.473	1.47767		3.07218		8.73295	AcPro
H1geoA	H_contig_1470	6855	7553	+	233	K01681	ACO, acnA; aconitate hydratase [EC:4.2.1.3]		14.7158	26.0198	28.8212	46.884	111.487	85.9714	1.76816		3.18596		7.57602	AcPro
H1geoA	H_contig_1471	3211	5451	-	747	K01338	lon; ATP-dependent Lon protease [EC:3.4.21.53]		23.3034	26.7826	34.9013	26.9978	121.111	103.265	1.1493		1.15853		5.19713	AcPro
H1geoA	H_contig_149	1376	1732	+	119	K06204	dksA; DnaK suppressor protein		232.723	165.576	79.6678	45.899	466.689	101.595	0.711472		0.197226	EET	2.00534
H1geoA	H_contig_1511	143	1426	+	428	K01703	leuC; 3-isopropylmalate/(R)-2-methylmalate dehydratase large subunit [EC:4.2.1.33 4.2.1.35]		175.629	97.7384	77.5272	6.87165	110.921	81.701	0.556504		0.0391259	EET	0.631564
H1geoA	H_contig_1511	1494	2021	+	176	K01704	leuD; 3-isopropylmalate/(R)-2-methylmalate dehydratase small subunit [EC:4.2.1.33 4.2.1.35]		140.868	110.229	85.2883	7.16169	111.968	88.3878	0.782503		0.0508398	EET	0.794843
H1geoA	H_contig_1511	4846	5916	+	357	K02067	ABC.X1.S; putative ABC transport system substrate-binding protein		52.4549	60.2865	30.9819	9.41518	100.363	81.0048	1.1493		0.179491	EET	1.91332
H1geoA	H_contig_1511	7055	7531	+	159				13.2706	34.3167	49.688	31.7096	78.8703	90.7528	2.58593		2.38947		5.94326	AcPro
H1geoA	H_contig_154	1	375	+	125	K02946	RP-S10, MRPS10, rpsJ; small subunit ribosomal protein S10		749.057	468.034	546.707	73.9468	1698.33	104.027	0.624831		0.09872	EET	2.26729
H1geoA	H_contig_154	397	1032	+	212	K02906	RP-L3, MRPL3, rplC; large subunit ribosomal protein L3		553.631	307.42	344.71	47.5644	819.688	97.1342	0.55528		0.0859136	EET	1.48057
H1geoA	H_contig_154	1051	1674	+	208	K02926	RP-L4, MRPL4, rplD; large subunit ribosomal protein L4		524.969	320.619	271.576	38.3793	676.113	105.595	0.61074		0.0731078	EET	1.28791
H1geoA	H_contig_154	1671	1955	+	95	K02892	RP-L23, MRPL23, rplW; large subunit ribosomal protein L23		735.73	456.292	449.075	141.525	1074.89	90.7928	0.620189		0.19236	EET	1.46098
H1geoA	H_contig_154	1978	2802	+	275	K02886	RP-L2, MRPL2, rplB; large subunit ribosomal protein L2		765.361	501.544	472.587	70.2801	1166.09	97.9394	0.655303		0.091826	EET	1.52358
H1geoA	H_contig_154	2829	3110	+	94	K02965	RP-S19, rpsS; small subunit ribosomal protein S19		892.268	506.293	449.65	107.273	933.858	94.5108	0.567422		0.120225	EET	1.04661
H1geoA	H_contig_154	3131	3466	+	112	K02890	RP-L22, MRPL22, rplV; large subunit ribosomal protein L22		779.482	587.316	486.72	78.7786	967.721	99.3899	0.753469		0.101065	EET	1.24149
H1geoA	H_contig_154	3488	4123	+	212	K02982	RP-S3, rpsC; small subunit ribosomal protein S3		645.696	453.266	415.516	77.2922	1009.82	107.066	0.701981		0.119704	EET	1.56393
H1geoA	H_contig_154	4148	4564	+	139	K02878	RP-L16, MRPL16, rplP; large subunit ribosomal protein L16		726.742	457.967	431.964	84.635	979.516	92.4521	0.630165		0.116458	EET	1.34782
H1geoA	H_contig_154	4554	4742	+	63	K02904	RP-L29, rpmC; large subunit ribosomal protein L29		824.749	490.783	363.669	93.3672	1180.1	83.6973	0.595069		0.113207	EET	1.43086
H1geoA	H_contig_154	4752	5009	+	86	K02961	RP-S17, MRPS17, rpsQ; small subunit ribosomal protein S17		1030.47	563.964	509.851	34.1985	1062.39	93.8163	0.547286		0.0331871	EET	1.03097
H1geoA	H_contig_154	5031	5399	+	123	K02874	RP-L14, MRPL14, rplN; large subunit ribosomal protein L14		735.504	423.89	372.539	68.3175	822.917	96.7711	0.576326		0.0928852	EET	1.11885
H1geoA	H_contig_154	5422	5748	+	109	K02895	RP-L24, MRPL24, rplX; large subunit ribosomal protein L24		767.059	475.554	445.756	53.9645	829.999	94.9166	0.61997		0.0703525	EET	1.08205
H1geoA	H_contig_154	5763	6302	+	180	K02931	RP-L5, MRPL5, rplE; large subunit ribosomal protein L5		619.818	394.07	346.739	60.6887	671.806	103.916	0.635783		0.0979138	EET	1.08388
H1geoA	H_contig_154	6547	6939	+	131	K02994	RP-S8, rpsH; small subunit ribosomal protein S8		855.685	506.761	385.973	83.3891	882.066	102.944	0.592228		0.097453	EET	1.03083
H1geoA	H_contig_154	6964	7503	+	180	K02933	RP-L6, MRPL6, rplF; large subunit ribosomal protein L6		650.589	404.174	318.21	74.6938	806.167	99.2245	0.621244		0.114809	EET	1.23913
H1geoA	H_contig_154	7518	7886	+	123	K02881	RP-L18, MRPL18, rplR; large subunit ribosomal protein L18		1070.02	712.234	501	204.952	1187.04	100.81	0.665627		0.191541	EET	1.10936
H1geoA	H_contig_154	7902	8396	+	165	K02988	RP-S5, MRPS5, rpsE; small subunit ribosomal protein S5		647.392	499.706	373.473	106.948	868.598	94.3009	0.771876		0.165198	EET	1.34169
H1geoA	H_contig_154	8414	8590	+	59	K02907	RP-L30, MRPL30, rpmD; large subunit ribosomal protein L30		675.027	452.127	267.81	56.9698	819.831	81.5149	0.669791		0.0843964	EET	1.21452
H1geoA	H_contig_154	8612	9052	+	147	K02876	RP-L15, MRPL15, rplO; large subunit ribosomal protein L15		714.105	565.019	365.46	54.3054	993.237	91.941	0.791227		0.0760469	EET	1.39088
H1geoA	H_contig_154	9055	10362	+	436	K03076	secY; preprotein translocase subunit SecY		517.221	382.39	324.351	53.0009	663.588	101.945	0.739316		0.102472	EET	1.28299
H1geoA	H_contig_154	11019	11765	+	249	K01265	E3.4.11.18, map; methionyl aminopeptidase [EC:3.4.11.18]		222.442	153.391	101.531	23.623	298.581	92.8097	0.68958		0.106199	EET	1.34229
H1geoA	H_contig_154	11933	12301	+	123	K02952	RP-S13, rpsM; small subunit ribosomal protein S13		675.463	520.005	391.808	37.5746	939.436	98.1653	0.769849		0.0556279	EET	1.3908
H1geoA	H_contig_154	12317	12712	+	132	K02948	RP-S11, MRPS11, rpsK; small subunit ribosomal protein S11		643.396	440.917	287.287	35.0127	678.592	95.6409	0.685297		0.0544186	EET	1.0547
H1geoA	H_contig_154	12802	13398	+	199	K02986	RP-S4, rpsD; small subunit ribosomal protein S4		1011.27	708.321	547.866	67.5622	1143.31	102.051	0.700426		0.0668092	EET	1.13057
H1geoA	H_contig_154	13432	14451	+	340	K03040	rpoA; DNA-directed RNA polymerase subunit alpha [EC:2.7.7.6]		570.946	345.926	348.547	30.8936	519.003	106.511	0.605881		0.0541094	EET	0.909023
H1geoA	H_contig_154	14551	15000	+	150	K02879	RP-L17, MRPL17, rplQ; large subunit ribosomal protein L17		710.373	422.362	581.995	78.4285	704.65	101.192	0.594564		0.110405	EET	0.991944
H1geoA	H_contig_1541	2	121	-	40				52.7505	98.5175	29.6265	0	44.7871	71.9518	1.86761		ZERO	EET	0.849037
H1geoA	H_contig_1541	1141	1404	-	88				59.9437	10.334	22.4443	52.5191	0	90.7441	0.172395	SP	0.87614		ZERO	Suc
H1geoA	H_contig_1541	1469	2215	-	249				124.991	32.8696	34.9013	32.0598	21.5841	94.0759	0.262976		0.256497		0.172685	Suc
H1geoA	H_contig_1560	1182	1472	+	97	K04078	groES, HSPE1; chaperonin GroES		187.618	437.508	228.052	51.9776	1477.51	93.2567	2.33191		0.27704		7.87512	AcPro
H1geoA	H_contig_1560	1536	3179	+	548	K04077	groEL, HSPD1; chaperonin GroEL		211.772	576.944	661.009	62.8695	1598.6	109.318	2.72437		0.296874		7.54871	AcPro
H1geoA	H_contig_1566	148	1749	-	534	K01937	E6.3.4.2, pyrG; CTP synthase [EC:6.3.4.2]		147.188	127.156	126.495	22.0305	229.806	96.9833	0.863904		0.149676	EET	1.56132
H1geoA	H_contig_1566	1995	2750	-	252	K00979	kdsB; 3-deoxy-manno-octulosonate cytidylyltransferase (CMP-KDO synthetase) [EC:2.7.7.38]		85.8242	75.7827	29.7832	13.3382	106.636	99.4117	0.882999		0.155413	EET	1.24249
H1geoA	H_contig_1582	3	380	-	126				18.8395	21.6522	31.3508	26.6764	163.508	91.7483	1.1493		1.41598		8.67904	AcPro
H1geoA	H_contig_1582	554	1972	-	473				27.8808	23.0713	19.2081	33.7543	187.481	101.344	0.827497		1.21067		6.72437	AcPro
H1geoA	H_contig_1582	2002	3651	-	550				35.9662	34.7222	32.3198	49.6544	224.75	100.515	0.965413		1.38058		6.24891	AcPro
H1geoA	H_contig_1582	3811	5346	-	512				28.8479	23.6821	24.6887	40.2099	197.693	90.5314	0.820929		1.39386		6.85294	AcPro
H1geoA	H_contig_1582	6964	9231	-	756	K04561	norB; nitric oxide reductase subunit B [EC:1.7.2.5]		15.6995	9.6232	12.0178	37.7915	144.551	90.7818	0.61296		2.40717		9.20733	AcPro
H1geoA	H_contig_1629	1865	2488	+	208			omcV (7)	223.175	166.139	136.738	16.1597	400.5	87.9807	0.744433		0.0724083	EET	1.79455
H1geoA	H_contig_164	663	1622	-	320	K03771	surA; peptidyl-prolyl cis-trans isomerase SurA [EC:5.2.1.8]		95.6102	103.254	72.8317	6.56488	151.156	88.0836	1.07995		0.068663	EET	1.58097
H1geoA	H_contig_164	1718	2476	-	253	K03769	ppiC; peptidyl-prolyl cis-trans isomerase C [EC:5.2.1.8]		427.425	397.784	441.86	43.1777	701.015	108.534	0.930653		0.101018	EET	1.64009
H1geoA	H_contig_1642	263	1528	-	422				5.00004	7.90151	10.2967	40.8205	50.9427	68.2884	1.58029		8.16403		10.1884	AcPro
H1geoA	H_contig_1642	1842	2207	-	122				12.9714	22.3621	12.9515	58.5458	161.527	94.1653	1.72395		4.51345		12.4525	AcPro
H1geoA	H_contig_1642	2377	2934	-	186				12.7622	13.0379	31.8564	60.9899	221.527	88.0513	1.0216		4.77894		17.3581	AcPro
H1geoA	H_contig_1642	3129	4448	-	440				13.7871	15.8455	14.3643	32.4663	99.753	70.8798	1.1493		2.35484		7.23527	AcPro
H1geoA	H_contig_1642	4518	5936	-	473				18.4013	22.4304	25.8892	55.0729	143.925	76.2716	1.21896		2.99287		7.82143	AcPro
H1geoA	H_contig_1642	6065	6979	-	305	K01779	E5.1.1.13; aspartate racemase [EC:5.1.1.13]		10.3771	12.9203	11.6563	46.8367	102.79	75.0266	1.24508		4.51345		9.90543	AcPro
H1geoA	H_contig_1642	7001	8686	-	562	K10852	E2.3.1.164; isopenicillin-N N-acyltransferase [EC:2.3.1.164]		13.61	15.1026	9.84034	22.4281	73.3169	59.7522	1.10967		1.64791		5.38699	AcPro
H1geoA	H_contig_1642	8711	9304	-	198				18.6492	26.0264	9.97524	12.7319	113.099	53.583	1.39558		0.682706		6.06455	AcPro
H1geoA	H_contig_1645	2	415	-	138	K00145	argC; N-acetyl-gamma-glutamyl-phosphate reductase [EC:1.2.1.38]		101.296	92.2572	74.424	12.1783	110.345	82.5719	0.910767		0.120225	EET	1.08933
H1geoA	H_contig_1645	580	969	-	130	K02996	RP-S9, MRPS9, rpsI; small subunit ribosomal protein S9		456.494	286.808	194.471	19.3917	606.348	99.1435	0.628284		0.0424795	EET	1.32827
H1geoA	H_contig_1645	992	1420	-	143	K02871	RP-L13, MRPL13, rplM; large subunit ribosomal protein L13		518.283	351.886	171.267	17.6288	645.185	107.153	0.678946		0.0340138	EET	1.24485
H1geoA	H_contig_1648	2615	3310	+	232				19.3267	32.6649	25.5401	27.165	104.246	87.4778	1.69015		1.40557		5.39388	AcPro
H1geoA	H_contig_1660	2	967	-	322	K03770	ppiD; peptidyl-prolyl cis-trans isomerase D [EC:5.2.1.8]		149.896	84.726	78.5132	5.21929	127.963	48.0329	0.56523		0.0348193	EET	0.853676
H1geoA	H_contig_1660	1125	1322	-	66	K03770	ppiD; peptidyl-prolyl cis-trans isomerase D [EC:5.2.1.8]		107.899	64.3005	29.9257	0	81.4311	85.4625	0.595934		ZERO	EET	0.754699
H1geoA	H_contig_1660	1563	2213	+	217	K03569	mreB; rod shape-determining protein MreB and related proteins		71.7115	75.4335	45.5092	3.87237	119.707	95.9247	1.0519		0.0539994	EET	1.66929
H1geoA	H_contig_1660	2489	2767	+	93	K03569	mreB; rod shape-determining protein MreB and related proteins		104.934	101.044	110.436	9.03554	115.58	74.9022	0.962928		0.0861071	EET	1.10145
H1geoA	H_contig_1660	2812	3825	+	338	K07011	K07011		52.2823	34.9766	40.9044	6.21527	63.603	86.4726	0.668996		0.118879	EET	1.21653
H1geoA	H_contig_1660	3859	4431	+	191	K03271	gmhA, lpcA; D-sedoheptulose 7-phosphate isomerase [EC:5.3.1.28]		55.2361	42.8509	31.0225	2.19975	79.7257	85.4764	0.775778		0.0398245	EET	1.44336
H1geoA	H_contig_1674	3	611	-	203	K03856	AROA2, aroA; 3-deoxy-7-phosphoheptulonate synthase [EC:2.5.1.54]		100.044	456.936	509.828	12.4183	154.438	97.7373	4.56735		0.124128	EET	1.5437
H1geoA	H_contig_1675	4395	5432	-	346	K00428	E1.11.1.5; cytochrome c peroxidase [EC:1.11.1.5]	macA (1)	225.638	384.608	389.311	246.506	2184.99	86.9445	1.70454		1.09248		9.68361	AcPro
H1geoA	H_contig_1689	1324	2343	-	340	K02029	ABC.PA.P; polar amino acid transport system permease protein		56.6292	78.4574	44.1492	0	76.4015	96.545	1.38546		ZERO	EET	1.34915
H1geoA	H_contig_1689	2407	3096	-	230	K02030	ABC.PA.S; polar amino acid transport system substrate-binding protein		133.023	160.791	159.725	5.48025	163.57	100.678	1.20875		0.0411978	EET	1.22964
H1geoA	H_contig_1689	3095	3247	+	51				51.7161	65.3811	7.74548	0	105.381	83.6055	1.26423		ZERO	EET	2.03769
H1geoA	H_contig_1689	6244	6468	-	75	K03666	hfq; host factor-I protein		116.051	88.9183	68.47	95.2346	824.082	105.173	0.766201		0.820627		7.10103	AcPro
H1geoA	H_contig_17	1	384	+	128	K07042	ybeY, yqfG; probable rRNA maturation factor		61.8169	80.5191	55.5496	3.28244	125.964	93.058	1.30254		0.0530994	EET	2.03769
H1geoA	H_contig_171	6112	7350	-	413	K13954	yiaY; alcohol dehydrogenase [EC:1.1.1.1]		124.532	16.1474	8.60817	4.06927	23.8575	113.754	0.129665	SP	0.0326765	EET	0.191578	Suc
H1geoA	H_contig_1710	1	363	-	121	K06131	cls; cardiolipin synthase [EC:2.7.8.-]		13.0786	20.0417	22.8524	10.417	66.6254	73.7484	1.5324		0.796491		5.09422	AcPro
H1geoA	H_contig_1710	440	979	-	180	K04084	dsbD; thiol:disulfide interchange protein DsbD [EC:1.8.1.8]		147.994	119.568	206.288	427.155	746.451	81.9137	0.807924		2.88629		5.04378	AcPro
H1geoA	H_contig_1725	1069	1839	-	257	K01962	accA; acetyl-CoA carboxylase carboxyl transferase subunit alpha [EC:6.4.1.2]		103.654	92.0008	63.0187	9.80901	128.959	104.852	0.887579		0.0946326	EET	1.24413
H1geoA	H_contig_1738	2	1891	-	630	K01890	FARSB, pheT; phenylalanyl-tRNA synthetase beta chain [EC:6.1.1.20]		83.7309	89.4957	82.766	2.66764	78.1997	74.8264	1.06885		0.0318596	EET	0.93394
H1geoA	H_contig_1745	3	1133	-	377	K03043	rpoB; DNA-directed RNA polymerase subunit beta [EC:2.7.7.6]		193.791	155.184	136.214	4.45785	282.741	103.767	0.800776		0.0230033	EET	1.45899
H1geoA	H_contig_1745	1296	1676	-	127	K02935	RP-L7, MRPL12, rplL; large subunit ribosomal protein L7/L12		1229.46	775.728	693.617	152.181	1544.63	104.598	0.630951		0.123779	EET	1.25634
H1geoA	H_contig_1745	1737	2258	-	174	K02864	RP-L10, MRPL10, rplJ; large subunit ribosomal protein L10		812.478	465.149	458.586	106.245	1086.22	99.7232	0.572506		0.130767	EET	1.33692
H1geoA	H_contig_1745	2442	3137	-	232	K02863	RP-L1, MRPL1, rplA; large subunit ribosomal protein L1		530.915	324.036	303.075	36.22	772.191	100.425	0.610335		0.0682219	EET	1.45445
H1geoA	H_contig_1745	3166	3588	-	141	K02867	RP-L11, MRPL11, rplK; large subunit ribosomal protein L11		480.74	240.785	224.125	17.8788	603.514	89.4981	0.500863		0.0371902	EET	1.25539
H1geoA	H_contig_1745	3652	4179	-	176	K02601	nusG; transcriptional antiterminator NusG		283.234	134.342	112.221	26.2595	564.928	99.6141	0.474315		0.0927132	EET	1.99456
H1geoA	H_contig_1745	4190	4375	-	62	K03073	secE; preprotein translocase subunit SecE		412.645	254.239	159.282	27.1066	476.766	93.7073	0.61612		0.06569	EET	1.15539
H1geoA	H_contig_1750	1	117	+	39				13.5258	7.77258	0	21.5463	91.8709	59.8353	0.57465		1.59298		6.79229	AcPro
H1geoA	H_contig_1750	556	1638	-	361	K01736	aroC; chorismate synthase [EC:4.2.3.5]		24.1103	26.0306	44.8637	26.7687	126.545	84.5327	1.07965		1.11026		5.24859	AcPro
H1geoA	H_contig_1752	5117	6520	+	468			1819 (8)	50.158	61.5329	40.5148	11.6709	266.043	51.1363	1.22678		0.232683		5.30409	AcPro
H1geoA	H_contig_1761	56	1468	-	471	K01915	glnA; glutamine synthetase [EC:6.3.1.2]		393.109	392.59	402.568	43.7101	747.402	106.981	0.99868		0.111191	EET	1.90126
H1geoA	H_contig_1761	1507	1911	-	135	K04751	glnB; nitrogen regulatory protein P-II 1		111.362	60.6261	20.4825	21.7857	126.067	114.965	0.544406		0.195629	EET	1.13205
H1geoA	H_contig_1762	3242	3715	-	158	K00334	nuoE; NADH-quinone oxidoreductase subunit E [EC:1.6.5.3]		10.0159	28.7782	22.5011	15.9552	79.3695	96.3223	2.87325		1.59298		7.92434	AcPro
H1geoA	H_contig_1762	3737	3910	-	58	K13380	nuoBCD; NADH-quinone oxidoreductase subunit B/C/D [EC:1.6.5.3]		13.6424	15.6792	27.2427	14.488	169.882	90.5211	1.1493		1.06199		12.4525	AcPro
H1geoA	H_contig_1766	65	358	+	98	K07483	K07483; transposase		13.4568	9.27951	12.0924	12.8618	73.1218	227.091	0.68958		0.955789		5.43384	AcPro
H1geoA	H_contig_1769	36	2471	-	812	K15314	mdpE, pksE; enediyne polyketide synthase		51.9709	45.9176	34.5399	1.55229	44.1252	88.6239	0.883525		0.0298684	EET	0.849037
H1geoA	H_contig_1794	4359	4739	+	127				80.9948	105.022	80.8701	13.2332	112.849	89.1189	1.29665		0.163383	EET	1.39329
H1geoA	H_contig_1833	2926	4677	+	584	K02945	RP-S1, rpsA; small subunit ribosomal protein S1		360.401	232.02	215.773	30.9359	470.878	106.307	0.643781		0.0858374	EET	1.30654
H1geoA	H_contig_1855	3691	4956	+	422				62.5005	76.8602	58.036	2.98687	63.6783	104.669	1.22975		0.0477894	EET	1.01884
H1geoA	H_contig_1862	1013	1390	-	126	K03406	mcp; methyl-accepting chemotaxis protein		121.41	79.3914	94.0523	13.3382	56.8725	72.6055	0.653913		0.109861	EET	0.468434
H1geoA	H_contig_1879	3	185	+	61	K03417	prpB; methylisocitrate lyase [EC:4.1.3.30]		0	0	0	6.88775	73.4214	43.2535	∞		∞		∞	AcPro
H1geoA	H_contig_1879	768	1694	+	309	K01720	prpD; 2-methylcitrate dehydratase [EC:4.2.1.79]		5.97497	2.94302	2.55676	14.9569	81.1675	64.5352	0.492557		2.50326		13.5846	AcPro
H1geoA	H_contig_1879	1755	3077	+	441	K01647	CS, gltA; citrate synthase [EC:2.3.3.1]		14.3539	10.9979	21.4977	157.2	871.368	102.842	0.766201		10.9517	OC	60.7061	AcPro
H1geoA	H_contig_1879	3132	4457	+	442	K01067	E3.1.2.1, ACH1; acetyl-CoA hydrolase [EC:3.1.2.1]		8.35415	6.85816	12.5119	289.924	780.227	107.46	0.820929		34.7042	OC	93.394	AcPro
H1geoA	H_contig_1881	1172	1447	-	92	K03530	hupB; DNA-binding protein HU-beta		550.44	257.002	184.629	18.2675	1431.24	95.2983	0.466903		0.0331871	EET	2.60018
H1geoA	H_contig_1896	1	492	+	164	K00611	OTC, argF, argI; ornithine carbamoyltransferase [EC:2.1.3.3]		67.5463	57.2991	89.1202	12.8095	185.703	92.3433	0.848293		0.189641	EET	2.74926
H1geoA	H_contig_1896	552	1769	+	406	K01940	E6.3.4.5, argG; argininosuccinate synthase [EC:6.3.4.5]		354.701	337.476	358.047	18.6275	719.241	106.864	0.951436		0.0525159	EET	2.02774
H1geoA	H_contig_1896	1831	2259	+	143	K03574	MUTT, NUDT1, MTH1; 7,8-dihydro-8-oxoguanine triphosphatase [EC:3.6.1.-]		55.3327	46.6355	46.9604	2.93813	100.223	100.647	0.842821		0.0530994	EET	1.81128
H1geoA	H_contig_19	3	587	-	195	K00341	nuoL; NADH-quinone oxidoreductase subunit L [EC:1.6.5.3]		6.76288	15.5452	14.1802	8.61851	59.7161	81.1478	2.2986		1.27439		8.82998	AcPro
H1geoA	H_contig_19	590	898	-	103	K00340	nuoK; NADH-quinone oxidoreductase subunit K [EC:1.6.5.3]		5.1214	29.4302	15.3406	24.4749	113.055	86.458	5.7465		4.77894		22.075	AcPro
H1geoA	H_contig_194	160	723	-	188	K00634	ptb; phosphate butyryltransferase [EC:2.3.1.19]		7.01469	8.06199	12.607	0	71.4687	102.915	1.1493		ZERO		10.1884	AcPro
H1geoA	H_contig_194	1818	2399	-	194	K08316	rsmD; 16S rRNA (guanine966-N2)-methyltransferase [EC:2.1.1.171]		66.6179	43.7508	16.2895	10.8287	69.2584	89.5302	0.656743		0.162549	EET	1.03964
H1geoA	H_contig_1950	198	1355	+	386	K01903	sucC; succinyl-CoA synthetase beta subunit [EC:6.2.1.5]		17.7657	29.8419	19.444	33.7428	155.478	100.46	1.67975		1.89932		8.75161	AcPro
H1geoA	H_contig_1950	1400	2290	+	297	K01902	sucD; succinyl-CoA synthetase alpha subunit [EC:6.2.1.5]		25.7536	23.4748	41.231	48.0983	177.942	102.1	0.911514		1.86763		6.9094	AcPro
H1geoA	H_contig_1960	837	1871	+	345	K02669	pilT; twitching motility protein PilT		51.986	66.7766	62.9741	8.52483	122.029	102.942	1.28451		0.163983	EET	2.34734
H1geoA	H_contig_1962	3	185	+	61	K05919	E1.15.1.2; superoxide reductase [EC:1.15.1.2]		77.8285	69.571	64.7573	68.8775	440.529	36.7492	0.893901		0.88499		5.66025	AcPro
H1geoA	H_contig_1962	11290	12633	+	448	K03406	mcp; methyl-accepting chemotaxis protein		129.521	53.4539	33.5061	9.37841	43.9873	51.6512	0.412703		0.0724083	EET	0.339615
H1geoA	H_contig_1964	2	169	+	56				0	5.41305	7.05392	90.0327	111.968	88.5947	∞		∞	OC	∞	AcPro
H1geoA	H_contig_1964	205	390	+	62				12.7622	24.446	0	284.619	303.396	95.7158	1.9155		22.3017	OC	23.773	AcPro
H1geoA	H_contig_1964	430	993	+	188				21.0441	25.7984	18.9105	612.35	385.931	102.712	1.22592		29.0985	OC	18.3392	AcPro
H1geoA	H_contig_1964	1059	1571	+	171				20.0513	8.86347	11.5503	412.781	303.819	92.0219	0.442039		20.5862	OC	15.152	AcPro
H1geoA	H_contig_1994	56	484	+	143	K02109	ATPF0B, atpF; F-type H+-transporting ATPase subunit b [EC:3.6.3.14]		350.44	237.417	182.317	11.7525	419.683	104.253	0.677483		0.0335365	EET	1.19759
H1geoA	H_contig_1994	486	1082	+	199	K02109	ATPF0B, atpF; F-type H+-transporting ATPase subunit b [EC:3.6.3.14]		340.625	243.723	260.038	8.44528	549.148	104.687	0.715518		0.0247935	EET	1.61218
H1geoA	H_contig_1994	1079	1621	+	181	K02113	ATPF1D, atpH; F-type H+-transporting ATPase subunit delta [EC:3.6.3.14]		373.042	239.49	242.25	13.9277	480.038	101.189	0.641992		0.0373355	EET	1.28682
H1geoA	H_contig_1994	1631	3139	+	503	K02111	ATPF1A, atpA; F-type H+-transporting ATPase subunit alpha [EC:3.6.3.14]		564.734	452.587	497.112	20.8823	799.579	108.836	0.801416		0.0369773	EET	1.41585
H1geoA	H_contig_1994	3160	4023	+	288	K02115	ATPF1G, atpG; F-type H+-transporting ATPase subunit gamma [EC:3.6.3.14]		478.051	393.649	421.08	18.9652	569.169	108.712	0.823445		0.039672	EET	1.1906
H1geoA	H_contig_1994	4075	5487	+	471	K02112	ATPF1B, atpD; F-type H+-transporting ATPase subunit beta [EC:3.6.3.14]		591.903	432.492	501.532	30.3295	684.643	106.865	0.730681		0.0512407	EET	1.15668
H1geoA	H_contig_2021	1	843	+	281	K09815	znuA; zinc transport system substrate-binding protein		11.2634	5.39379	11.2461	2.99041	121.132	80.9158	0.478875		0.265497		10.7545	AcPro
H1geoA	H_contig_2021	840	1592	+	251	K09817	znuC; zinc transport system ATP-binding protein [EC:3.6.3.-]		5.25403	8.45384	3.14757	3.34783	85.6486	100.049	1.60902		0.637193		16.3015	AcPro
H1geoA	H_contig_2021	1641	1775	+	45	K09816	znuB; zinc transport system permease protein		0	6.73624	0	0	59.7161	76.399	∞		∞		∞	AcPro
H1geoA	H_contig_2028	3	1106	-	368	K01676	E4.2.1.2A, fumA, fumB; fumarate hydratase, class I [EC:4.2.1.2]		57.3375	124.382	125.59	20.5509	516.025	79.293	2.16931		0.358421		8.99979	AcPro
H1geoA	H_contig_2058	3	440	-	146	K11264	mmcD; methylmalonyl-CoA decarboxylase [EC:4.1.1.41]		34.3239	47.7535	64.9347	34.5331	171.786	79.0338	1.39126		1.00609		5.00485	AcPro
H1geoA	H_contig_2064	282	1139	-	286				14.7554	21.198	34.5297	27.9122	106.487	43.3937	1.43663		1.89167		7.21681	AcPro
H1geoA	H_contig_207	671	1144	-	158	K00261	GLUD1_2, gdhA; glutamate dehydrogenase (NAD(P)+) [EC:1.4.1.3]		20.0318	40.2895	32.5016	53.1839	102.047	89.9663	2.01128		2.65497		5.09422	AcPro
H1geoA	H_contig_207	5476	5943	+	156	K03594	bfr; bacterioferritin		8.4536	1.94315	0	43.0926	86.129	70.3291	0.22986		5.09754		10.1884	AcPro
H1geoA	H_contig_207	9409	11007	+	533	K01067	E3.1.2.1, ACH1; acetyl-CoA hydrolase [EC:3.1.2.1]		48.4948	60.8536	83.006	36.2608	445.35	102.547	1.25485		0.747726		9.18346	AcPro
H1geoA	H_contig_207	13639	15126	+	496	K08307	mltD, dniR; membrane-bound lytic murein transglycosylase D [EC:3.2.1.-]		53.1759	55.6147	39.0241	6.77665	79.461	93.873	1.04586		0.127439	EET	1.4943
H1geoA	H_contig_207	15193	15921	+	243				130.248	104.786	71.5262	8.64511	132.702	104.915	0.804511		0.0663742	EET	1.01884
H1geoA	H_contig_207	16029	17774	+	582	K06207	typA, bipA; GTP-binding protein		91.5429	106.252	80.0899	4.33147	115.431	104.837	1.16068		0.0473163	EET	1.26095
H1geoA	H_contig_207	17906	18013	+	36	K06207	typA, bipA; GTP-binding protein		58.6116	58.9421	98.7549	0	124.409	50.1269	1.00564		ZERO	EET	2.12259
H1geoA	H_contig_207	18082	18870	+	263	K05807	bamD; outer membrane protein assembly factor BamD		76.2174	84.1389	108.142	4.79261	85.1465	84.3394	1.10393		0.0628809	EET	1.11715
H1geoA	H_contig_207	23160	23876	+	239	K07164	K07164		228.438	332.302	195.031	1.75796	434.753	90.4119	1.45467		0.00769556	EET	1.90315
H1geoA	H_contig_2081	1365	1943	-	193	K00532	E1.12.7.2; ferredoxin hydrogenase [EC:1.12.7.2]		150.325	158.633	92.103	28.3004	394.498	87.3217	1.05527		0.188261	EET	2.6243
H1geoA	H_contig_2087	3	320	-	106	K00031	IDH1, IDH2, icd; isocitrate dehydrogenase [EC:1.1.1.42]		49.7646	68.6334	108.071	15.8548	1115.45	87.3538	1.37916		0.318596		22.4146	AcPro
H1geoA	H_contig_2087	1538	3322	-	595	K01876	DARS, aspS; aspartyl-tRNA synthetase [EC:6.1.1.12]		81.1205	75.91	63.0703	7.76753	158.072	99.3156	0.935769		0.095753	EET	1.94861
H1geoA	H_contig_2091	1948	3666	+	573	K12600	SKI3, TTC37; superkiller protein 3		50.1728	46.5541	46.8784	6.59925	106.301	90.4367	0.927876		0.131531	EET	2.1187
H1geoA	H_contig_2092	194	1453	-	420	K00627	DLAT, aceF, pdhC; pyruvate dehydrogenase E2 component (dihydrolipoamide acetyltransferase) [EC:2.3.1.12]		27.0032	28.8696	37.6209	32.0116	200.476	75.0305	1.06912		1.18547		7.42414	AcPro
H1geoA	H_contig_2092	1463	2449	-	329	K00162	PDHB, pdhB; pyruvate dehydrogenase E1 component subunit beta [EC:1.2.4.1]		22.447	36.8548	39.622	14.0477	160.635	89.0541	1.64186		0.625814		7.15617	AcPro
H1geoA	H_contig_2097	3	854	-	284	K00003	E1.1.1.3; homoserine dehydrogenase [EC:1.1.1.3]		50.1501	43.7618	38.9456	4.43823	88.3126	104.618	0.872617		0.088499	EET	1.76097
H1geoA	H_contig_2097	1097	1534	-	146	K03625	nusB; N utilization substance protein B		52.3892	43.601	67.6403	2.87776	36.8113	104.892	0.832252		0.0549304	EET	0.702651
H1geoA	H_contig_2097	1535	2002	-	156	K00794	ribH, RIB4; 6,7-dimethyl-8-ribityllumazine synthase [EC:2.5.1.78]		89.6082	83.5553	81.0296	8.07986	91.8709	103.592	0.932452		0.0901688	EET	1.02525
H1geoA	H_contig_2097	2111	3415	-	435	K14652	ribBA; 3,4-dihydroxy 2-butanone 4-phosphate synthase / GTP cyclohydrolase II [EC:4.1.99.12 3.5.4.25]		67.3023	50.8702	58.1178	9.65868	59.7161	107.079	0.755846		0.143512	EET	0.887282
H1geoA	H_contig_2116	4072	4572	+	167				50.5394	27.2273	40.2116	7.54765	53.6372	93.0379	0.538735		0.149342	EET	1.0613
H1geoA	H_contig_2116	5769	6338	-	190				6.94085	14.3588	22.8695	26.536	80.1453	79.8745	2.06874		3.82316		11.5469	AcPro
H1geoA	H_contig_215	5421	7493	+	691				25.192	26.321	54.8797	72.3562	627.408	95.0369	1.04482		2.87219		24.9051	AcPro
H1geoA	H_contig_215	7527	8705	+	393				9.39576	12.3412	12.0617	11.76	132.196	88.7705	1.31349		1.25163		14.0698	AcPro
H1geoA	H_contig_2150	1601	3451	+	617	K04013	nrfB; cytochrome c-type protein NrfB	cbcL (9)	368.484	270.214	343.161	18.3859	615.55	112.77	0.733313		0.0498962	EET	1.67049
H1geoA	H_contig_2165	182	568	-	129	K09710	ybeB; ribosome-associated protein		57.2486	23.4985	42.8703	6.51399	76.3811	98.4299	0.410465		0.113784	EET	1.3342
H1geoA	H_contig_2165	4528	4605	-	26	K03306	TC.PIT; inorganic phosphate transporter, PiT family		111.588	69.9532	106.351	0	68.9032	32.2808	0.626891		ZERO	EET	0.617481
H1geoA	H_contig_2181	635	1006	-	124				36.1596	34.2244	41.4133	10.165	195.041	92.9088	0.946483		0.281114		5.39388	AcPro
H1geoA	H_contig_2188	3	101	+	33				223.79	220.459	155.614	0	217.149	66.4832	0.985115		ZERO	EET	0.970328
H1geoA	H_contig_2188	98	2152	-	685	K02355	fusA, GFM, EFG; elongation factor G		453.577	268.614	281.415	35.575	575.367	98.5512	0.592212		0.078432	EET	1.26851
H1geoA	H_contig_2188	2227	2697	-	157	K02992	RP-S7, MRPS7, rpsG; small subunit ribosomal protein S7		480.466	322.438	236.508	21.409	724.581	95.2699	0.671095		0.0445589	EET	1.50808
H1geoA	H_contig_2188	2751	3122	-	124	K02950	RP-S12, MRPS12, rpsL; small subunit ribosomal protein S12		531.759	315.354	232.552	40.6599	910.189	101.151	0.593039		0.0764631	EET	1.71166
H1geoA	H_contig_2188	3281	7426	-	1382	K03046	rpoC; DNA-directed RNA polymerase subunit beta' [EC:2.7.7.6]		234.362	176.351	158.637	34.962	322.778	97.9527	0.752474		0.14918	EET	1.37726
H1geoA	H_contig_2188	7534	9621	-	696	K03043	rpoB; DNA-directed RNA polymerase subunit beta [EC:2.7.7.6]		189.098	151.13	140.754	17.5064	248.388	92.8484	0.799213		0.0925781	EET	1.31354
H1geoA	H_contig_219	6568	7368	-	267			6017 (6)	7.90269	9.08257	23.6716	17.3097	100.645	41.7077	1.1493		2.19035		12.7356	AcPro
H1geoA	H_contig_22	1	411	+	137	K02479	K02479; two-component system, NarL family, response regulator		7.7008	4.42527	8.65006	6.13361	58.8443	88.1592	0.57465		0.796491		7.64133	AcPro
H1geoA	H_contig_22	3502	3996	-	165	K03408	cheW; purine-binding chemotaxis protein CheW		255.76	181.878	81.398	43.2884	152.005	95.5357	0.71113		0.169254	EET	0.594326
H1geoA	H_contig_2214	559	2031	+	491	K00053	ilvC; ketol-acid reductoisomerase [EC:1.1.1.86]		824.562	1389.09	1218.04	9.41279	176.959	105.002	1.68464		0.0114155	EET	0.21461
H1geoA	H_contig_2214	2112	3023	-	304				35.5719	28.9171	12.9941	31.7879	206.256	96.0105	0.81292		0.893624		5.7983	AcPro
H1geoA	H_contig_2214	4586	5029	-	148	K02939	RP-L9, MRPL9, rplI; large subunit ribosomal protein L9		278.009	153.614	40.0358	0	351.034	92.9893	0.552548		ZERO	EET	1.26267
H1geoA	H_contig_2214	5053	6006	-	318				175.835	82.932	40.9926	13.2123	261.962	93.3964	0.471647		0.0751406	EET	1.48982
H1geoA	H_contig_2214	6007	6285	-	93	K02963	RP-S18, MRPS18, rpsR; small subunit ribosomal protein S18		331.817	221.644	144.416	9.03554	703.109	87.9507	0.66797		0.0272305	EET	2.11896
H1geoA	H_contig_2214	6289	6690	-	134	K02990	RP-S6, MRPS6, rpsF; small subunit ribosomal protein S6		511.758	244.314	106.125	9.4064	701.887	97.1397	0.477402		0.0183806	EET	1.37152
H1geoA	H_contig_2214	6853	7947	-	365	K06942	K06942		90.3261	63.9481	50.8655	3.45331	46.6276	101.773	0.707969		0.0382316	EET	0.516214
H1geoA	H_contig_2214	7967	8533	-	189	K01056	PTH1, pth, spoVC; peptidyl-tRNA hydrolase, PTH1 family [EC:3.1.1.29]		99.0816	72.174	43.8911	0	61.6119	100.794	0.72843		ZERO	EET	0.62183
H1geoA	H_contig_2216	3	1280	-	426	K04561	norB; nitric oxide reductase subunit B [EC:1.7.2.5]		1.23827	0.711574	0	6.90392	56.7724	88.5042	0.57465		5.57544		45.848	AcPro
H1geoA	H_contig_2219	2	1189	-	396	K07399	resB, ccs1; cytochrome c biogenesis protein		179.831	150.8	127.683	12.7319	214.888	88.1858	0.838564		0.0707992	EET	1.19494
H1geoA	H_contig_2219	1771	2055	-	95	K01588	purE; 5-(carboxyamino)imidazole ribonucleotide mutase [EC:5.4.99.18]		58.3031	63.817	74.8458	8.84532	66.002	57.9445	1.09457		0.151713	EET	1.13205
H1geoA	H_contig_2219	2392	3405	-	338	K01945	purD; phosphoribosylamine--glycine ligase [EC:6.3.4.13]		61.6462	57.3975	29.2174	3.72916	50.3523	49.0888	0.931079		0.060493	EET	0.816795
H1geoA	H_contig_2228	3387	4082	+	232				111.413	36.5847	15.324	3.622	46.3315	66.8596	0.328372		0.0325098	EET	0.415855
H1geoA	H_contig_2232	3	377	-	125	K04759	feoB; ferrous iron transport protein B		386.133	33.9506	3.16016	3.36122	7.16593	73.3183	0.0879246	SP	0.00870482	EET	0.0185582	Suc
H1geoA	H_contig_2232	374	601	-	76	K04758	feoA; ferrous iron transport protein A		336.631	27.9199	20.7905	0	23.5721	77.1624	0.0829392	SP	ZERO	EET	0.0700237	Suc
H1geoA	H_contig_2232	606	773	-	56	K04758	feoA; ferrous iron transport protein A		193.104	0	0	7.50272	0	72.2784	ZERO	SP	0.0388532	EET	ZERO	Suc
H1geoA	H_contig_226	1	477	+	159	K00344	E1.6.5.5, qor; NADPH2:quinone reductase [EC:1.6.5.5]		28.1999	49.5685	47.2036	36.9946	152.107	81.8728	1.75775		1.31187		5.39388	AcPro
H1geoA	H_contig_226	2411	3451	+	347	K10011	arnA, pmrI; UDP-4-amino-4-deoxy-L-arabinose formyltransferase / UDP-glucuronic acid dehydrogenase (UDP-4-keto-hexauronic acid decarboxylating) [EC:2.1.2.13 1.1.1.305]		9.88121	14.8508	18.2142	2.42163	77.4416	93.3666	1.50293		0.245074		7.83726	AcPro
H1geoA	H_contig_2270	3	368	-	122	K00655	plsC; 1-acyl-sn-glycerol-3-phosphate acyltransferase [EC:2.3.1.51]		75.6666	34.7855	42.0922	10.3316	146.843	93.8814	0.45972		0.136541	EET	1.94066
H1geoA	H_contig_2270	655	1020	+	122	K03111	ssb; single-strand DNA-binding protein		62.6952	57.1476	38.8544	0	110.132	96.1193	0.911514		ZERO	EET	1.75663
H1geoA	H_contig_2282	3	119	+	39	K00177	korG; 2-oxoglutarate ferredoxin oxidoreductase subunit gamma [EC:1.2.7.3]		47.3402	31.0903	40.5148	0	551.226	23.032	0.656743		ZERO		11.6439	AcPro
H1geoA	H_contig_2282	5162	5401	+	80	K06910	K06910		19.7814	56.837	69.1284	42.0153	145.558	84.4431	2.87325		2.12398		7.35832	AcPro
H1geoA	H_contig_2287	3	2168	-	722	K00525	E1.17.4.1A, nrdA, nrdE; ribonucleoside-diphosphate reductase alpha chain [EC:1.17.4.1]		88.0392	63.3971	77.1437	8.72893	186.096	97.6334	0.720101		0.0991482	EET	2.11378
H1geoA	H_contig_2287	4794	5513	+	240	K00989	rph; ribonuclease PH [EC:2.7.7.56]		57.1463	54.3109	46.0856	1.75064	59.7161	85.0338	0.950383		0.0306343	EET	1.04497
H1geoA	H_contig_231	1	312	+	104	K03596	lepA; GTP-binding protein LepA		68.4742	32.0619	34.1844	0	129.194	97.1055	0.468234		ZERO	EET	1.88675
H1geoA	H_contig_231	648	1322	+	225	K03100	lepB; signal peptidase I [EC:3.4.21.89]		73.8506	90.2656	57.9362	0	87.5836	90.4316	1.22227		ZERO	EET	1.18596
H1geoA	H_contig_231	1559	2863	-	435	K00813	aspC; aspartate aminotransferase [EC:2.6.1.1]		202.513	229.264	205.229	15.4539	360.356	100.711	1.1321		0.0763105	EET	1.77942
H1geoA	H_contig_232	2494	3018	+	175				48.229	71.0192	60.9459	24.0087	255.926	88.422	1.47254		0.497807		5.30648	AcPro
H1geoA	H_contig_233	223	1101	+	293				50.41	51.7288	40.4457	10.0378	97.8284	96.4409	1.02616		0.199123	EET	1.94066
H1geoA	H_contig_233	1817	2023	+	69	K03060	rpoZ; DNA-directed RNA polymerase subunit omega [EC:2.7.7.6]		149.077	140.582	57.2492	12.1783	207.708	83.4401	0.943016		0.0816914	EET	1.39329
H1geoA	H_contig_2348	1	912	+	304	K00540	E1.-.-.-		55.5268	50.8542	41.581	9.67457	58.9304	105.035	0.915849		0.174232	EET	1.0613
H1geoA	H_contig_235	1983	2195	+	71				11.1445	132.353	33.3819	11.8353	126.161	47.1872	11.8761	SP+	1.06199		11.3205	AcPro
H1geoA	H_contig_235	2192	2749	+	186	K06897	7,8-dihydropterin-6-yl-methyl-4-(beta-D-ribofuranosyl)aminobenzene 5'-phosphate synthase [EC:2.5.1.105]		8.50814	48.8921	31.8564	20.33	57.7898	50.7839	5.7465		2.38947		6.79229	AcPro
H1geoA	H_contig_2355	235	804	+	190	K03390	hdrC; heterodisulfide reductase subunit C [EC:1.8.98.1]		19.4344	49.4582	24.9486	4.42266	122.575	110.776	2.54488		0.227569		6.30713	AcPro
H1geoA	H_contig_2363	3	647	-	215	K01912	paaK; phenylacetate-CoA ligase [EC:6.2.1.30]		63.7913	26.7883	22.0476	1.9542	74.9923	86.0677	0.419937		0.0306343	EET	1.17559
H1geoA	H_contig_2363	820	1401	-	194	K00180	iorB; indolepyruvate ferredoxin oxidoreductase, beta subunit [EC:1.2.7.8]		61.1797	35.9382	24.4342	8.66294	69.2584	77.6038	0.58742		0.141598	EET	1.13205
H1geoA	H_contig_2363	1398	3152	-	585	K00179	iorA; indolepyruvate ferredoxin oxidoreductase, alpha subunit [EC:1.2.7.8]		77.0968	41.4538	37.8138	2.87284	76.5591	87.8904	0.537685		0.0372627	EET	0.993025
H1geoA	H_contig_237	339	692	-	118	K03536	rnpA; ribonuclease P protein component [EC:3.1.26.5]		131.876	141.29	66.9525	0	296.05	109.477	1.07138		ZERO	EET	2.24491
H1geoA	H_contig_237	2746	3864	+	373	K02338	DPO3B, dnaN; DNA polymerase III subunit beta [EC:2.7.7.7]		82.732	48.761	60.3649	3.37924	144.087	114.149	0.589385		0.0408457	EET	1.74161
H1geoA	H_contig_237	5159	7549	+	797	K02470	gyrB; DNA gyrase subunit B [EC:5.99.1.3]		72.474	63.8971	57.4934	4.21734	94.4069	111.511	0.881655		0.0581911	EET	1.30263
H1geoA	H_contig_237	7680	10187	+	836	K02469	gyrA; DNA gyrase subunit A [EC:5.99.1.3]		63.4141	53.6643	60.4814	5.02575	71.7879	107.173	0.846251		0.0792528	EET	1.13205
H1geoA	H_contig_2370	1960	3249	-	430	K01689	ENO, eno; enolase [EC:4.2.1.11]		322.023	215.011	270.083	42.0153	699.928	105.062	0.667689		0.130473	EET	2.17353
H1geoA	H_contig_240	3	839	-	279	K00773	tgt, QTRT1; queuine tRNA-ribosyltransferase [EC:2.4.2.29]		59.557	56.4975	21.2376	0	61.0003	80.2454	0.948629		ZERO	EET	1.02423
H1geoA	H_contig_2433	1430	2029	-	200	K11294	NCL, NSR1; nucleolin		10.5501	24.2505	19.751	2.10076	62.7019	71.7652	2.2986		0.199123		5.94326	AcPro
H1geoA	H_contig_248	1020	1616	+	199	K03640	pal; peptidoglycan-associated lipoprotein		237.245	581.889	498.241	10.5566	571.654	83.1658	2.4527		0.0444967	EET	2.40956
H1geoA	H_contig_248	1950	3857	+	636	K12600	SKI3, TTC37; superkiller protein 3		128.559	266.908	200.615	5.94556	199.993	96.498	2.07616		0.0462479	EET	1.55565
H1geoA	H_contig_248	3932	4078	-	49				37.6789	55.6771	40.3081	25.7236	237.646	64.9129	1.47767		0.682706		6.30713	AcPro
H1geoA	H_contig_250	3	554	-	184	K02301	cyoE; protoheme IX farnesyltransferase [EC:2.5.1.-]		4.30031	11.5321	8.58738	2.28344	53.5498	47.2631	2.6817		0.530994		12.4525	AcPro
H1geoA	H_contig_250	1864	2463	-	200	K02276	coxC; cytochrome c oxidase subunit III [EC:1.9.3.1]		13.1876	10.6096	9.87549	6.30229	85.0955	55.3451	0.804511		0.477894		6.45268	AcPro
H1geoA	H_contig_250	3057	4199	-	381	K02274	coxA; cytochrome c oxidase subunit I [EC:1.9.3.1]		12.4607	17.5036	16.5887	2.20553	84.637	51.5761	1.4047		0.176998		6.79229	AcPro
H1geoA	H_contig_251	3	77	+	25				84.4007	72.7514	94.8047	0	0	46.9299	0.861976		ZERO	EET	ZERO	Suc
H1geoA	H_contig_251	239	1603	-	455	K11927	rhlE; ATP-dependent RNA helicase RhlE [EC:3.6.4.13]		98.5448	144.57	121.544	0.923412	102.37	105.043	1.46705		0.00937048	EET	1.03882
H1geoA	H_contig_251	2558	2887	-	110	K05366	mrcA; penicillin-binding protein 1A [EC:2.4.1.- 3.4.-.-]		52.7505	66.1376	68.2306	7.63914	40.7155	94.5651	1.25378		0.144817	EET	0.771852
H1geoA	H_contig_252	1037	1237	+	67				3291	3130.84	2075.33	301.005	6524.21	92.2164	0.951335		0.0914631	EET	1.98244
H1geoA	H_contig_252	1386	1799	+	138	K00940	E2.7.4.6, ndk; nucleoside-diphosphate kinase [EC:2.7.4.6]		642.18	522.791	306.283	45.6688	720.488	105.392	0.814088		0.0711152	EET	1.12194
H1geoA	H_contig_252	2482	3027	+	182	K06941	rlmN; 23S rRNA (adenine2503-C2)-methyltransferase [EC:2.1.1.192]		52.1708	54.9633	45.5792	0	63.9815	87.4631	1.05353		ZERO	EET	1.22639
H1geoA	H_contig_252	6897	7289	+	131	K07714	atoC; two-component system, NtrC family, response regulator AtoC		96.6421	85.6171	72.37	141.12	519.667	88.1955	0.885919		1.46023		5.37723	AcPro
H1geoA	H_contig_2535	2862	3323	-	154				232.924	423.202	425.8	346.489	1477.39	100.45	1.81691		1.48756		6.3428	AcPro
H1geoA	H_contig_2538	3	1463	-	487	K01881	PARS, proS; prolyl-tRNA synthetase [EC:6.1.1.15]		53.0754	44.816	28.3895	6.03915	62.5364	101.881	0.844384		0.113784	EET	1.17826
H1geoA	H_contig_2555	1270	2043	+	258	K03496	parA, soj; chromosome partitioning protein		60.3154	38.7725	42.8703	0	65.9655	103.864	0.642829		ZERO	EET	1.09367
H1geoA	H_contig_256	688	1065	+	126	K01496	hisI; phosphoribosyl-AMP cyclohydrolase [EC:3.5.4.19]		64.8914	40.8986	15.6754	6.66909	85.3087	101.205	0.630262		0.102773	EET	1.31464
H1geoA	H_contig_256	1219	1926	+	236	K00765	hisG; ATP phosphoribosyltransferase [EC:2.4.2.17]		7.82316	10.2756	5.02143	3.56061	60.7282	92.2891	1.31349		0.455138		7.76262	AcPro
H1geoA	H_contig_258	1	393	-	131	K07216	K07216; hemerythrin		193.284	266.107	431.204	230.924	1244.47	96.5225	1.37677		1.19474		6.43853	AcPro
H1geoA	H_contig_258	465	1400	-	312				289.958	397.373	734.331	491.525	2003.93	86.553	1.37045		1.69516		6.91111	AcPro
H1geoA	H_contig_258	3439	4236	+	266	K00948	PRPS, prsA; ribose-phosphate pyrophosphokinase [EC:2.7.6.1]		171.538	142.449	69.7967	7.8976	171.74	85.0831	0.83042		0.0460399	EET	1.00118
H1geoA	H_contig_258	4295	4882	+	196	K02897	RP-L25, rplY; large subunit ribosomal protein L25		308.16	219.615	155.186	12.8618	351.898	87.4064	0.712667		0.0417375	EET	1.14194
H1geoA	H_contig_2586	3	584	-	194	K01923	purC; phosphoribosylaminoimidazole-succinocarboxamide synthase [EC:6.3.2.6]		331.73	251.567	293.21	19.4916	392.464	84.912	0.75835		0.0587575	EET	1.18308
H1geoA	H_contig_2586	697	1182	-	162	K03770	ppiD; peptidyl-prolyl cis-trans isomerase D [EC:5.2.1.8]		164.438	102.915	185.318	5.18707	243.288	81.9129	0.625857		0.0315442	EET	1.47951
H1geoA	H_contig_2588	99	578	-	160				186.275	149.671	56.784	31.5114	352.698	109.497	0.803493		0.169166	EET	1.89343
H1geoA	H_contig_2588	853	2022	-	390	K01875	SARS, serS; seryl-tRNA synthetase [EC:6.1.1.11]		93.3277	64.5124	43.5534	9.69583	174.555	89.0432	0.691246		0.10389	EET	1.87034
H1geoA	H_contig_2619	261	1823	+	521	K00602	purH; phosphoribosylaminoimidazolecarboxamide formyltransferase / IMP cyclohydrolase [EC:2.1.2.3 3.5.4.10]		156.935	134.983	133.442	4.83861	185.682	102.381	0.860122		0.0308319	EET	1.18317
H1geoA	H_contig_2625	19	957	+	313				91.0072	85.2253	80.7708	2.68468	111.61	94.0517	0.936467		0.0294997	EET	1.22639
H1geoA	H_contig_2660	3267	3632	-	122				77.8285	57.1476	25.9029	6.88775	102.79	93.7806	0.734275		0.088499	EET	1.32072
H1geoA	H_contig_2678	110	1093	+	328	K01867	WARS, trpS; tryptophanyl-tRNA synthetase [EC:6.1.1.2]		50.6597	49.9057	54.1947	3.84286	68.273	84.6848	0.985115		0.0758563	EET	1.34768
H1geoA	H_contig_2683	1530	1727	-	66	K03286	TC.OOP; OmpA-OmpF porin, OOP family		99.9062	45.9289	53.8663	261.004	1058.6	82.1986	0.45972		2.61249		10.596	AcPro
H1geoA	H_contig_27	227	1360	-	378	K03684	rnd; ribonuclease D [EC:3.1.13.5]		83.7309	63.3527	54.3413	1.11151	125.593	108.237	0.756623		0.0132748	EET	1.49996
H1geoA	H_contig_27	1532	2584	-	351	K00817	hisC; histidinol-phosphate aminotransferase [EC:2.6.1.9]		88.6689	75.135	67.5247	4.78806	91.8709	104.575	0.847366		0.0539994	EET	1.03611
H1geoA	H_contig_272	3	533	+	177	K04770	lonH; Lon-like ATP-dependent protease [EC:3.4.21.-]		17.8815	17.126	20.0857	30.8587	91.0924	80.1983	0.957751		1.72573		5.09422	AcPro
H1geoA	H_contig_2747	242	1321	+	360	K02835	prfA, MTRF1, MRF1; peptide chain release factor 1		71.7992	44.6276	49.3774	1.16709	44.7871	102.736	0.621561		0.0162549	EET	0.623782
H1geoA	H_contig_276	1365	2180	-	272	K11931	pgaB; biofilm PGA synthesis lipoprotein PgaB [EC:3.-.-.-]		90.18	113.674	79.8753	3.08936	59.277	101.29	1.26052		0.0342577	EET	0.657319
H1geoA	H_contig_276	2860	3045	+	62				12.7622	29.3352	6.37128	47.4366	144.474	94.131	2.2986		3.71696		11.3205	AcPro
H1geoA	H_contig_2830	2170	2676	-	169	K01462	PDF, def; peptide deformylase [EC:3.5.1.88]		51.5019	55.6039	42.0731	0	74.2034	103.196	1.07965		ZERO	EET	1.44079
H1geoA	H_contig_2830	2684	3250	-	189	K03567	gcvR; glycine cleavage system transcriptional repressor		86.5219	62.5508	35.5309	0	85.3087	104.832	0.722947		ZERO	EET	0.985978
H1geoA	H_contig_2836	2242	2712	-	157				359.51	322.438	400.052	1675.26	2110.98	96.4722	0.896884		4.65984		5.87184	AcPro
H1geoA	H_contig_2847	3	362	-	120	K01952	purL, PFAS; phosphoribosylformylglycinamidine synthase [EC:6.3.5.3]		63.7401	55.574	32.9183	7.00254	52.2516	95.3223	0.871883		0.109861	EET	0.81976
H1geoA	H_contig_2847	346	1434	-	363	K03442	mscS; small conductance mechanosensitive channel		78.4718	69.3109	39.1755	3.47234	49.3522	95.7664	0.883259		0.0442495	EET	0.628916
H1geoA	H_contig_2847	1427	2722	-	432	K01756	purB, ADSL; adenylosuccinate lyase [EC:4.3.2.2]		125.771	96.1317	99.6693	5.83545	122.335	101.452	0.764341		0.0463975	EET	0.972683
H1geoA	H_contig_2847	2825	3637	-	271	K01567	E3.-.-.-		68.1279	76.0623	30.6104	4.65114	99.1596	95.1586	1.11646		0.0682706	EET	1.45549
H1geoA	H_contig_2847	7131	8330	+	400	K00927	PGK, pgk; phosphoglycerate kinase [EC:2.7.2.3]		216.936	137.924	175.784	19.9572	624.78	102.786	0.635783		0.0919959	EET	2.88002
H1geoA	H_contig_2847	8437	9192	+	252	K01803	TPI, tpiA; triosephosphate isomerase (TIM) [EC:5.3.1.1]		150.716	101.044	126.971	26.6764	526.07	82.5562	0.670425		0.176998	EET	3.49048
H1geoA	H_contig_2871	259	450	+	64				0	4.73642	0	0	55.9839	72.5118	∞		∞		∞	AcPro
H1geoA	H_contig_2899	408	2072	-	555	K01887	RARS, argS; arginyl-tRNA synthetase [EC:6.1.1.19]		96.9468	106.505	84.6979	4.54219	116.204	97.8804	1.0986		0.0468524	EET	1.19864
H1geoA	H_contig_2914	3	1010	-	336	K02486	K02486; two-component system, unclassified family, sensor kinase [EC:2.7.13.3]		29.8291	38.7935	34.0939	16.2559	159.954	93.7287	1.30052		0.544967		5.36234	AcPro
H1geoA	H_contig_2914	2186	2500	+	105			3115 (1)	25.1193	43.3044	71.4797	56.0203	127.963	88.1119	1.72395		2.23017		5.09422	AcPro
H1geoA	H_contig_2914	3462	3818	-	119				17.7312	15.2839	3.31949	24.7149	150.545	80.5243	0.861976		1.39386		8.49037	AcPro
H1geoA	H_contig_3	15	368	+	118				13.4111	10.2756	3.34762	0	75.9103	76.0401	0.766201		ZERO		5.66025	AcPro
H1geoA	H_contig_3	5456	7252	+	599	K12600	SKI3, TTC37; superkiller protein 3		52.3982	39.9788	28.357	2.80569	40.3757	80.5402	0.762981		0.0535456	EET	0.770554
H1geoA	H_contig_3039	3	362	+	120	K01923	purC; phosphoribosylaminoimidazole-succinocarboxamide synthase [EC:6.3.2.6]		219.794	146.513	187.634	0	179.148	84.423	0.666594		ZERO	EET	0.815075
H1geoA	H_contig_304	4999	6600	+	534	K06950	K06950; uncharacterized protein		86.4357	81.1755	88.0287	10.2284	177.806	99.1968	0.939143		0.118336	EET	2.05709
H1geoA	H_contig_3040	2043	2735	-	231				183.827	174.53	94.0523	289.196	969.417	108.096	0.949422		1.57319		5.27352	AcPro
H1geoA	H_contig_3040	2979	4103	-	375	K01696	trpB; tryptophan synthase beta chain [EC:4.2.1.20]		117.458	99.4269	77.9505	20.1673	236.476	99.9025	0.846491		0.171699	EET	2.01328
H1geoA	H_contig_3051	2	424	+	141				16.8353	30.0981	8.40467	59.5961	209.642	74.3548	1.7878		3.53996		12.4525	AcPro
H1geoA	H_contig_307	1059	2558	+	500	K00705	malQ; 4-alpha-glucanotransferase [EC:2.4.1.25]		6.85756	11.519	16.5908	4.20153	55.536	87.7915	1.67975		0.612685		8.0985	AcPro
H1geoA	H_contig_3104	3	977	-	325				111.182	77.4149	41.3251	6.46389	33.0735	94.6205	0.696292		0.058138	EET	0.297473
H1geoA	H_contig_3118	304	837	+	178				54.8249	30.6537	17.7537	9.44163	156	51.2495	0.559119		0.172214	EET	2.84542
H1geoA	H_contig_3124	3	623	+	207	K03168	topA; DNA topoisomerase I [EC:5.99.1.2]		52.2408	52.7184	36.2578	6.08917	129.818	70.2663	1.00914		0.11656	EET	2.48499
H1geoA	H_contig_315	1170	1514	+	115				6.88049	7.90776	13.7398	14.614	54.5234	33.6536	1.1493		2.12398		7.92434	AcPro
H1geoA	H_contig_315	3314	3679	-	122				2.1619	2.48468	3.23786	106.76	51.395	36.1242	1.1493		49.3824	OC	23.773	AcPro
H1geoA	H_contig_315	3957	5648	-	564				9.82056	5.91212	18.2101	5.95961	61.9396	36.976	0.602015		0.60685		6.30713	AcPro
H1geoA	H_contig_3249	12	1319	-	436	K07670	mtrA; two-component system, OmpR family, response regulator MtrA		67.1479	68.8301	55.2665	10.6002	127.376	81.7069	1.02505		0.157863	EET	1.89695
H1geoA	H_contig_3249	2781	3185	-	135				76.1951	67.3624	55.5953	6.22448	165.878	84.8415	0.884078		0.0816914	EET	2.17702
H1geoA	H_contig_3249	3267	4442	-	392	K00620	argJ; glutamate N-acetyltransferase / amino-acid N-acetyltransferase [EC:2.3.1.35 2.3.1.1]		88.8146	94.3417	83.6393	7.50272	139.388	95.6041	1.06223		0.0844763	EET	1.56943
H1geoA	H_contig_3249	4696	6603	-	636	K03070	secA; preprotein translocase subunit SecA		91.6498	84.8385	90.0595	8.58802	139.431	87.5236	0.925681		0.0937048	EET	1.52135
H1geoA	H_contig_326	868	1557	-	230	K03465	E2.1.1.148, thyX, thy1; thymidylate synthase (FAD) [EC:2.1.1.148]		80.2724	55.3543	27.4796	1.82675	81.7851	110.511	0.68958		0.0227569	EET	1.01884
H1geoA	H_contig_326	1670	1873	-	68	K02909	RP-L31, rpmE; large subunit ribosomal protein L31	na (1)	224.965	178.312	69.7093	37.0723	289.799	87.9403	0.792621		0.164791	EET	1.28819
H1geoA	H_contig_326	1975	3222	-	416	K03628	rho; transcription termination factor Rho		121.732	96.9144	74.0661	11.1098	99.0484	107.631	0.79613		0.0912646	EET	0.81366
H1geoA	H_contig_3260	1	1245	+	415	K03303	TC.LCTP; lactate transporter, LctP family		52.7505	46.0174	63.7742	9.11174	8.63365	83.2868	0.872361		0.172733	EET	0.16367	Suc
H1geoA	H_contig_33	1	522	+	174	K02160	accB, bccP; acetyl-CoA carboxylase biotin carboxyl carrier protein		134.908	97.5593	90.8091	4.82934	190.474	90.5421	0.723156		0.0357973	EET	1.41188
H1geoA	H_contig_33	606	746	+	47	K01961	accC; acetyl-CoA carboxylase, biotin carboxylase subunit [EC:6.4.1.2 6.3.4.14]		101.012	77.3951	8.40467	0	114.35	76.1339	0.766201		ZERO	EET	1.13205
H1geoA	H_contig_331	4	1047	-	348	K01845	hemL; glutamate-1-semialdehyde 2,1-aminomutase [EC:5.4.3.8]		73.5172	74.0406	74.9175	6.03667	123.551	83.0854	1.00712		0.0821125	EET	1.68057
H1geoA	H_contig_331	1254	1424	-	57	K01845	hemL; glutamate-1-semialdehyde 2,1-aminomutase [EC:5.4.3.8]		64.7813	74.4532	27.7207	0	62.8591	84.4891	1.1493		ZERO	EET	0.970328
H1geoA	H_contig_331	1826	2182	+	119	K00330	nuoA; NADH-quinone oxidoreductase subunit A [EC:1.6.5.3]		144.066	280.205	142.738	10.5921	782.833	90.1347	1.94497		0.0735222	EET	5.43384	AcPro
H1geoA	H_contig_331	2173	2685	+	171	K00331	nuoB; NADH-quinone oxidoreductase subunit B [EC:1.6.5.3]		195.886	350.993	309.547	34.3985	979.554	107.005	1.79182		0.175604	EET	5.00063	AcPro
H1geoA	H_contig_331	2719	3204	+	162	K00332	nuoC; NADH-quinone oxidoreductase subunit C [EC:1.6.5.3]		234.446	432.242	363.32	51.8707	1288.32	93.0147	1.84367		0.221247		5.49515	AcPro
H1geoA	H_contig_331	3278	4432	+	385	K00333	nuoD; NADH-quinone oxidoreductase subunit D [EC:1.6.5.3]		187.024	387.377	382.707	36.0131	1058.6	105.441	2.07127		0.192558	EET	5.66025	AcPro
H1geoA	H_contig_331	4464	4970	+	169	K00334	nuoE; NADH-quinone oxidoreductase subunit E [EC:1.6.5.3]		184.158	367.703	271.138	29.8333	1054.75	101.493	1.99667		0.161998	EET	5.7274	AcPro
H1geoA	H_contig_331	5008	6789	+	594	K00335	nuoF; NADH-quinone oxidoreductase subunit F [EC:1.6.5.3]		123.884	259.753	287.287	42.4397	731.372	106.463	2.09675		0.342577		5.9037	AcPro
H1geoA	H_contig_331	6902	9367	+	822	K00123	E1.2.1.2A; formate dehydrogenase, alpha subunit [EC:1.2.1.2]		120.004	283.955	351.769	51.6246	903.37	103.264	2.36621		0.43019		7.52782	AcPro
H1geoA	H_contig_331	9409	10458	+	350	K00337	nuoH; NADH-quinone oxidoreductase subunit H [EC:1.6.5.3]		139.412	301.399	397.277	76.8279	992.994	108.597	2.16193		0.551086		7.12273	AcPro
H1geoA	H_contig_331	10500	10898	+	133	K00338	nuoI; NADH-quinone oxidoreductase subunit I [EC:1.6.5.3]		140.8	257.547	273.247	47.3856	875.537	106.212	1.82917		0.336545		6.2183	AcPro
H1geoA	H_contig_331	10909	11412	+	168	K00339	nuoJ; NADH-quinone oxidoreductase subunit J [EC:1.6.5.3]		89.4874	243.587	293.913	42.5154	613.156	97.5902	2.72203		0.4751		6.85188	AcPro
H1geoA	H_contig_331	11432	11734	+	101	K00340	nuoK; NADH-quinone oxidoreductase subunit K [EC:1.6.5.3]		88.7879	297.128	281.598	49.9191	629.68	105.289	3.34649		0.562229		7.09195	AcPro
H1geoA	H_contig_331	11872	13875	+	668	K00341	nuoL; NADH-quinone oxidoreductase subunit L [EC:1.6.5.3]		99.4994	263.651	395.019	47.8018	746.898	101.103	2.64978		0.480423		7.50656	AcPro
H1geoA	H_contig_331	13927	15102	+	392	K00342	nuoM; NADH-quinone oxidoreductase subunit M [EC:1.6.5.3]		86.1232	237.401	313.396	42.8727	664.951	94.7996	2.75653		0.497807		7.72093	AcPro
H1geoA	H_contig_3349	3	110	-	36				358.996	227.348	362.101	58.3545	174.172	63.1378	0.633288		0.162549	EET	0.485164
H1geoA	H_contig_3427	1	324	+	108	K03442	mscS; small conductance mechanosensitive channel		31.748	36.488	47.5486	35.0127	223.935	82.343	1.1493		1.10283		7.05354	AcPro
H1geoA	H_contig_3427	636	1238	+	201	K00123	E1.2.1.2A; formate dehydrogenase, alpha subunit [EC:1.2.1.2]		15.7464	21.1136	27.5138	25.0837	106.954	102.774	1.34085		1.59298		6.79229	AcPro
H1geoA	H_contig_3480	654	920	-	89	K02959	RP-S16, MRPS16, rpsP; small subunit ribosomal protein S16		577.884	333.784	119.837	75.533	835.355	91.8606	0.577597		0.130706	EET	1.44554
H1geoA	H_contig_3511	568	1395	-	276	K00341	nuoL; NADH-quinone oxidoreductase subunit L [EC:1.6.5.3]		21.0237	34.0473	22.8997	15.2229	113.59	96.2312	1.61947		0.724083		5.40296	AcPro
H1geoA	H_contig_3524	1	453	+	151	K00342	nuoM; NADH-quinone oxidoreductase subunit M [EC:1.6.5.3]		97.8154	254.951	363.627	69.5617	741.508	90.9841	2.60645		0.711152		7.58069	AcPro
H1geoA	H_contig_3524	485	1444	+	320	K00343	nuoN; NADH-quinone oxidoreductase subunit N [EC:1.6.5.3]		103.028	255.767	362.924	73.5267	691.401	97.1146	2.48249		0.713656		6.71079	AcPro
H1geoA	H_contig_3527	3	617	-	205	K03406	mcp; methyl-accepting chemotaxis protein		0	1.47869	0	14.3467	74.281	96.5479	∞		∞		∞	AcPro
H1geoA	H_contig_3527	710	1843	-	378	K01999	livK; branched-chain amino acid transport system substrate-binding protein		2.79103	0.801933	1.04503	35.5685	78.1997	89.3441	0.287325		12.7439		28.0182	AcPro
H1geoA	H_contig_3550	2	1474	+	491	K01835	pgm; phosphoglucomutase [EC:5.4.2.2]		20.4126	14.1996	15.2859	12.8356	147.77	90.8293	0.695629		0.628809		7.23916	AcPro
H1geoA	H_contig_3555	2308	2817	+	170	K01802	E5.2.1.8; peptidylprolyl isomerase [EC:5.2.1.8]		107.052	121.252	34.8547	9.88594	63.2288	109.392	1.13264		0.0923468	EET	0.590634
H1geoA	H_contig_356	1	438	+	146				90.3261	80.9733	83.874	5.75551	55.2169	76.6929	0.896455		0.0637193	EET	0.611306
H1geoA	H_contig_356	523	711	+	63	K09862	K09862; hypothetical protein		71.1713	38.4928	31.3508	0	56.8725	71.7386	0.540847		ZERO	EET	0.799093
H1geoA	H_contig_356	1064	1786	+	241	K01885	EARS, gltX; glutamyl-tRNA synthetase [EC:6.1.1.17]		78.7974	95.5931	63.9243	5.23011	163.538	90.0235	1.21315		0.0663742	EET	2.07542
H1geoA	H_contig_3567	3	173	+	57	K01783	rpe, RPE; ribulose-phosphate 3-epimerase [EC:5.1.3.1]		50.8996	47.8627	27.7207	0	62.8591	86.5745	0.940337		ZERO	EET	1.23496
H1geoA	H_contig_3585	834	1292	+	153	K00936	E2.7.3.-		13.791	27.7375	20.6546	5.49219	70.2542	81.4741	2.01128		0.398245		5.09422	AcPro
H1geoA	H_contig_360	1888	2322	+	145				20.0088	2.09056	8.17282	49.2593	123.551	93.2684	0.104482		2.46188		6.17481	AcPro
H1geoA	H_contig_360	2336	3121	+	262	K01092	E3.1.3.25, IMPA, suhB; myo-inositol-1(or 4)-monophosphatase [EC:3.1.3.25]		6.04013	5.78494	4.52312	9.62181	92.3093	79.7343	0.957751		1.59298		15.2827	AcPro
H1geoA	H_contig_3623	3	917	-	305	K01892	HARS, hisS; histidyl-tRNA synthetase [EC:6.1.1.21]		55.3447	43.7303	34.9689	1.37755	52.8634	77.285	0.790144		0.0248903	EET	0.955166
H1geoA	H_contig_364	1	249	+	83				3.17774	3.65218	0	192.359	97.1286	80.2439	1.1493		60.5333	OC	30.5653	AcPro
H1geoA	H_contig_364	1365	1559	+	65				4.05773	18.6542	0	64.6389	110.245	84.7964	4.5972		15.9298	OC	27.1692	AcPro
H1geoA	H_contig_364	1745	2179	-	145				10.9139	4.18111	5.44854	84.0305	277.989	93.2962	0.3831		7.69941	OC	25.4711	AcPro
H1geoA	H_contig_364	11787	13103	+	439	K11103	dctA; aerobic C4-dicarboxylate transport protein		55.2738	84.9318	114.277	33.4974	457.053	94.8051	1.53657		0.606026		8.26888	AcPro
H1geoA	H_contig_3643	1	693	-	231			cytT (5)	42.246	388.427	377.919	14.5507	62.0427	94.8641	9.19441	SP+	0.344428		1.4686
H1geoA	H_contig_3643	1242	1913	-	224				277.882	493.941	603.11	30.0109	287.917	86.9505	1.77752		0.107999	EET	1.03611
H1geoA	H_contig_366	1214	1678	-	155	K00599	E2.1.1.-		74.8716	39.1136	66.2613	5.42132	144.474	98.3955	0.522409		0.0724083	EET	1.92963
H1geoA	H_contig_366	1928	2686	-	253	K04035	E1.14.13.81, acsF, chlE; magnesium-protoporphyrin IX monomethyl ester (oxidative) cyclase [EC:1.14.13.81]		70.8899	59.9073	34.3495	8.30341	113.295	84.2765	0.845074		0.117131	EET	1.59819
H1geoA	H_contig_368	745	1512	-	256	K11293	HIRA, HIR1; protein HIRA/HIR1		33.9993	37.8913	46.2913	22.9771	178.449	91.4852	1.11447		0.67581		5.24859	AcPro
H1geoA	H_contig_3729	3	281	+	93	K03406	mcp; methyl-accepting chemotaxis protein		167.327	114.081	89.1979	9.03554	77.053	60.3681	0.681789		0.0539994	EET	0.460495
H1geoA	H_contig_3732	1	204	+	68	K03517	nadA; quinolinate synthase [EC:2.5.1.72]		54.3019	71.3249	17.4273	0	223.935	92.6629	1.31349		ZERO	EET	4.12389
H1geoA	H_contig_3743	548	997	-	150	K10380	ANK; ankyrin		172.318	238.463	194.876	851.509	1875.09	102.634	1.38385		4.94149		10.8815	AcPro
H1geoA	H_contig_3748	3	479	-	159	K08995	K08995; putative membrane protein		8.2941	5.71945	4.9688	134.766	174.641	73.4219	0.68958		16.2484	OC	21.0561	AcPro
H1geoA	H_contig_378	4944	5459	+	172	K00985	E2.7.7.48; RNA-directed RNA polymerase [EC:2.7.7.48]		12.2675	17.6239	13.7797	12.2137	78.117	89.5838	1.43663		0.995613		6.36778	AcPro
H1geoA	H_contig_378	5459	5908	+	150	K07560	dtd; D-tyrosyl-tRNA(Tyr) deacylase [EC:3.1.-.-]		24.6169	62.647	44.7689	39.2142	185.12	85.6035	2.54488		1.59298		7.52004	AcPro
H1geoA	H_contig_378	5909	6196	-	96				32.969	66.3098	45.2626	43.7659	214.605	77.6389	2.01128		1.32748		6.50928	AcPro
H1geoA	H_contig_3830	2494	2913	-	140			omcV (6)	184.627	149.4	104.398	9.00327	255.926	49.6864	0.809202		0.0487647	EET	1.38618
H1geoA	H_contig_3867	1	996	+	332	K03168	topA; DNA topoisomerase I [EC:5.99.1.2]		57.9937	45.6522	46.4029	8.85864	116.015	102.975	0.787192		0.152752	EET	2.00047
H1geoA	H_contig_3887	25	1359	-	445	K00359	E1.6.-.-; NADH oxidase [EC:1.6.-.-]		24.3008	34.7408	23.9675	20.7716	169.084	89.7257	1.42962		0.854771		6.95796	AcPro
H1geoA	H_contig_3887	1358	1573	+	72				36.6323	25.2609	32.9183	35.0127	311.021	89.4164	0.68958		0.955789		8.49037	AcPro
H1geoA	H_contig_39	1	477	+	159	K00936	E2.7.3.-		8.2941	11.4389	7.4532	5.28494	50.7024	99.2255	1.37916		0.637193		6.11306	AcPro
H1geoA	H_contig_39	575	1453	+	293	K00930	argB; acetylglutamate kinase [EC:2.7.2.8]		58.5116	52.7634	31.0084	2.86794	165.085	107.082	0.901759		0.0490148	EET	2.82141
H1geoA	H_contig_39	1685	2224	+	180	K00818	E2.6.1.11, argD; acetylornithine aminotransferase [EC:2.6.1.11]		84.9869	70.7305	70.2257	11.6709	199.054	98.5071	0.832252		0.137326	EET	2.34217
H1geoA	H_contig_390	2241	3098	-	286	K02557	motB; chemotaxis protein MotB		138.332	233.177	227.896	123.401	829.97	88.7611	1.68564		0.89207		5.99986	AcPro
H1geoA	H_contig_390	6791	7648	+	286	K08677	K08677; kumamolisin		51.6438	30.737	8.28712	1.46906	3.13196	52.6744	0.595174		0.0284461	EET	0.0606455	Suc
H1geoA	H_contig_3932	3	155	-	51	K03596	lepA; GTP-binding protein LepA		15.5148	41.6062	7.74548	0	87.8178	65.3045	2.6817		ZERO		5.66025	AcPro
H1geoA	H_contig_398	3173	4375	+	401	K02945	RP-S1, rpsA; small subunit ribosomal protein S1		182.193	207.883	157.614	35.6239	223.377	102.923	1.141		0.195528	EET	1.22605
H1geoA	H_contig_4010	3	380	-	126				94.1973	103.449	106.593	46.6836	526.07	93.9464	1.09822		0.495594		5.58478	AcPro
H1geoA	H_contig_4098	881	1570	-	230	K02003	ABC.CD.A; putative ABC transport system ATP-binding protein		10.3207	18.4514	13.7398	14.614	54.5234	99.6758	1.7878		1.41598		5.2829	AcPro
H1geoA	H_contig_41	174	2177	-	668	K00962	pnp, PNPT1; polyribonucleotide nucleotidyltransferase [EC:2.7.7.8]		296.919	325.82	372.548	13.8374	374.12	106.76	1.09734		0.0466032	EET	1.26001
H1geoA	H_contig_41	2176	2427	+	84				65.9381	83.0001	28.2157	5.00182	106.636	103.773	1.25876		0.0758563	EET	1.61721
H1geoA	H_contig_41	2444	2710	-	89	K02956	RP-S15, MRPS15, rpsO; small subunit ribosomal protein S15		340.804	347.408	110.961	14.1624	392.516	108.244	1.01938		0.041556	EET	1.15174
H1geoA	H_contig_41	3737	4705	-	323	K06881	K06881; phosphoesterase RecJ domain-containing protein		68.5919	87.2791	58.7026	10.4063	110.928	94.328	1.27244		0.151713	EET	1.61721
H1geoA	H_contig_41	4686	5045	-	120	K02834	rbfA; ribosome-binding factor A		92.3133	90.9392	79.0039	3.50127	67.1806	107.596	0.985115		0.0379281	EET	0.727746
H1geoA	H_contig_41	5140	8040	-	967	K02519	infB, MTIF2; translation initiation factor IF-2		171.016	183.697	162.991	17.8141	259.367	102.377	1.07415		0.104166	EET	1.51662
H1geoA	H_contig_41	8041	8634	-	198	K07742	K07742; hypothetical protein		118.555	107.167	75.8118	21.2198	167.386	91.2748	0.903944		0.178987	EET	1.41188
H1geoA	H_contig_41	8636	9790	-	385	K02600	nusA; N utilization substance protein A		139.754	118.89	109.785	14.187	183.802	99.1767	0.850708		0.101514	EET	1.31517
H1geoA	H_contig_41	9831	10094	-	88	K09748	rimP; ribosome maturation factor RimP		65.9381	62.004	31.422	9.54892	20.3578	71.5829	0.940337		0.144817	EET	0.308741
H1geoA	H_contig_4105	3	164	-	54	K01579	panD; aspartate 1-decarboxylase [EC:4.1.1.11]		0	16.8406	0	23.3418	116.115	91.7336	∞		∞		∞	AcPro
H1geoA	H_contig_4105	170	1009	-	280	K01918	panC; pantoate--beta-alanine ligase [EC:6.3.2.1]		1.88395	3.24783	1.41078	3.00109	83.176	106.815	1.72395		1.59298		44.1499	AcPro
H1geoA	H_contig_4105	3440	4426	-	329	K00936	E2.7.3.-		83.3746	71.8669	55.2307	10.2165	100.737	100.844	0.861976		0.122537	EET	1.20824
H1geoA	H_contig_4127	35	1807	+	591	K01873	VARS, valS; valyl-tRNA synthetase [EC:6.1.1.9]		51.7686	51.8041	41.4403	2.13275	74.2662	87.1877	1.00068		0.0411978	EET	1.43458
H1geoA	H_contig_4165	1	540	+	180	K07220	K07220; hypothetical protein		74.7298	111.148	68.0311	7.00254	144.314	109.004	1.48733		0.0937048	EET	1.93114
H1geoA	H_contig_4165	533	1414	+	294	K03306	TC.PIT; inorganic phosphate transporter, PiT family		81.6376	93.8262	87.3342	1.42909	100.542	103.913	1.1493		0.0175053	EET	1.23157
H1geoA	H_contig_4194	1	237	+	79	K03808	pqiA; paraquat-inducible protein A		10.0159	30.6968	0	0	56.6925	71.935	3.0648		ZERO		5.66025	AcPro
H1geoA	H_contig_4204	3	560	-	186	K00341	nuoL; NADH-quinone oxidoreductase subunit L [EC:1.6.5.3]		12.7622	22.8163	19.1138	13.5533	91.5005	82.7192	1.7878		1.06199		7.16964	AcPro
H1geoA	H_contig_4371	662	1057	+	132	K09022	yjgF; UPF0076 protein YjgF		57.9456	57.4111	71.8217	6.36595	81.4311	91.0054	0.990777		0.109861	EET	1.4053
H1geoA	H_contig_4371	1129	1320	-	64	K02902	RP-L28, MRPL28, rpmB; large subunit ribosomal protein L28		700.592	426.278	302.437	118.168	643.814	98.0408	0.608453		0.168669	EET	0.918957
H1geoA	H_contig_438	2040	2633	+	198			omcQ (6)	110.563	97.9816	207.485	2576.09	49.7634	90.426	0.886208		23.2998	OC	0.450092
H1geoA	H_contig_438	2790	3188	+	133			omcQ (6)	55.5268	54.7003	89.1021	3108.5	47.1443	81.6073	0.985115		55.9819	OC	0.849037
H1geoA	H_contig_438	5193	5441	+	83				419.461	463.827	2046.49	8266.37	366.93	78.7566	1.10577		19.7071	OC	0.874765
H1geoA	H_contig_438	5493	5756	+	88				269.747	347.911	1310.75	8560.61	437.692	85.408	1.28977		31.7357	OC	1.6226
H1geoA	H_contig_438	5789	6442	+	218				279.481	390.733	982.113	11421.2	501.287	84.5365	1.39807		40.8658	OC	1.79364
H1geoA	H_contig_438	6507	7550	+	348			cbcA (5)	134.15	162.889	418.857	9393.07	221.361	77.3828	1.21423		70.0192	OC	1.65011
H1geoA	H_contig_438	7547	8281	+	245	K08354	phsC; thiosulfate reductase cytochrome b subunit		60.2862	100.219	204.765	7336.38	175.492	65.6064	1.66238		121.692	OC	2.91098
H1geoA	H_contig_438	8347	9183	+	279	K02482	K02482; two-component system, NtrC family, sensor kinase [EC:2.7.13.3]	1295 (1)	34.9779	48.8921	92.0296	4237.67	112.369	81.2934	1.3978		121.153	OC	3.21257
H1geoA	H_contig_438	9215	9769	+	185				99.7982	88.4814	85.4096	1103.75	193.674	85.7395	0.886603		11.0598	OC	1.94066
H1geoA	H_contig_438	10151	12622	-	824	K05299	E1.2.1.43A, fdhA; formate dehydrogenase alpha subunit [EC:1.2.1.43]		20.8057	60.3318	82.9349	16.8265	352.209	89.5808	2.89977		0.808744		16.9285	AcPro
H1geoA	H_contig_438	12680	14692	-	671	K15022	fdhB; formate dehydrogenase beta subunit [EC:1.2.1.43]		24.3706	52.8559	35.3222	4.38311	220.264	58.4883	2.16884		0.179853		9.03813	AcPro
H1geoA	H_contig_440	1719	2618	+	300	K06911	K06911		24.6169	36.3757	28.9681	35.0127	128.39	81.3714	1.47767		1.4223		5.21551	AcPro
H1geoA	H_contig_441	1	240	+	80				13.1876	15.1565	9.87549	21.0076	123.164	55.1744	1.1493		1.59298		9.3394	AcPro
H1geoA	H_contig_443	476	763	-	96				104.402	101.044	115.214	87.5318	625.153	68.553	0.967832		0.838411		5.98794	AcPro
H1geoA	H_contig_443	1092	1334	+	81				371.207	542.641	136.55	72.619	4777.29	87.4337	1.46183		0.195629	EET	12.8696	AcPro
H1geoA	H_contig_443	1460	1789	+	110				14.3865	27.5573	10.7733	0	122.147	86.2546	1.9155		ZERO		8.49037	AcPro
H1geoA	H_contig_4472	1	546	+	182	K05601	hcp; hydroxylamine reductase [EC:1.7.99.1]		127.529	159.893	197.51	184.682	738.249	76.2406	1.25378		1.44817		5.78889	AcPro
H1geoA	H_contig_458	1	726	+	242	K02967	RP-S2, MRPS2, rpsB; small subunit ribosomal protein S2		439.224	310.646	194.245	20.834	684.761	90.0874	0.707262		0.0474337	EET	1.55903
H1geoA	H_contig_458	777	1478	+	234	K02357	tsf, TSFM; elongation factor Ts		455.367	340.698	253.218	23.3418	616.301	107.798	0.748183		0.0512593	EET	1.35342
H1geoA	H_contig_458	1646	2368	+	241	K09903	pyrH; uridylate kinase [EC:2.7.4.22]		202.465	138.358	114.736	19.1771	189.555	104.587	0.683368		0.0947178	EET	0.936235
H1geoA	H_contig_458	2370	2927	+	186	K02838	frr, MRRF, RRF; ribosome recycling factor		214.121	180.901	165.653	20.33	346.739	100.944	0.84485		0.0949459	EET	1.61935
H1geoA	H_contig_458	3030	3782	+	251	K00806	uppS; undecaprenyl diphosphate synthase [EC:2.5.1.31]		58.8451	59.1769	23.6067	1.67391	85.6486	99.4446	1.00564		0.0284461	EET	1.45549
H1geoA	H_contig_458	4712	5869	+	386	K00099	dxr; 1-deoxy-D-xylulose-5-phosphate reductoisomerase [EC:1.1.1.267]		58.0802	54.1866	38.8879	3.26543	69.6172	87.2458	0.932962		0.0562229	EET	1.19864
H1geoA	H_contig_458	7862	9523	+	554	K01687	ilvD; dihydroxy-acid dehydratase [EC:4.2.1.9]		96.1696	100.679	86.2768	9.85918	166.537	87.25	1.04689		0.102519	EET	1.7317
H1geoA	H_contig_458	9629	11101	+	491	K01652	E2.2.1.6L, ilvB, ilvG, ilvI; acetolactate synthase I/II/III large subunit [EC:2.2.1.6]		66.0724	58.6505	26.5492	5.98995	96.689	53.3777	0.887671		0.0906575	EET	1.46338
H1geoA	H_contig_4704	2	154	+	51	K02452	gspC; general secretion pathway protein C		56.8878	65.3811	54.2184	0	35.1271	72.2725	1.1493		ZERO	EET	0.617481
H1geoA	H_contig_4704	285	1163	+	293	K02453	gspD; general secretion pathway protein D		63.0125	58.9708	44.4902	4.3019	91.7142	93.6836	0.935859		0.0682706	EET	1.45549
H1geoA	H_contig_475	3189	5099	+	637	K01868	TARS, thrS; threonyl-tRNA synthetase [EC:6.1.1.3]		179.699	162.272	112.243	10.5533	326.236	106.547	0.903022		0.0587274	EET	1.81545
H1geoA	H_contig_475	5291	5629	+	113	K02520	infC, MTIF3; translation initiation factor IF-3		303.432	252.162	94.3852	40.8998	428.054	93.0966	0.831033		0.134791	EET	1.41071
H1geoA	H_contig_475	5666	5854	+	63	K02916	RP-L35, MRPL35, rpmI; large subunit ribosomal protein L35		347.483	279.073	219.455	13.3382	781.997	89.4231	0.803126		0.0383851	EET	2.25046
H1geoA	H_contig_475	6073	6375	+	101	K02887	RP-L20, MRPL20, rplT; large subunit ribosomal protein L20		2298.04	1797.78	1063.81	91.5184	2119.63	105.82	0.782308		0.0398245	EET	0.922363
H1geoA	H_contig_475	6451	7467	+	339	K01889	FARSA, pheS; phenylalanyl-tRNA synthetase alpha chain [EC:6.1.1.20]		168.833	132.34	108.368	2.47878	214.027	98.2173	0.783855		0.0146819	EET	1.26769
H1geoA	H_contig_475	7501	7764	+	88	K01890	FARSB, pheT; phenylalanyl-tRNA synthetase beta chain [EC:6.1.1.20]		65.9381	48.2253	44.8886	0	101.789	91.7654	0.731373		ZERO	EET	1.5437
H1geoA	H_contig_480	2378	2728	+	117			ppcD (3)	51.8487	25.9086	33.7623	28.7284	574.193	96.8917	0.499696		0.554081		11.0744	AcPro
H1geoA	H_contig_480	8952	9461	+	170	K05520	pfpI; protease I [EC:3.2.-.-]		23.2723	16.0481	25.5601	37.0723	147.534	77.6976	0.68958		1.59298		6.33947	AcPro
H1geoA	H_contig_480	9538	10449	-	304	K10206	E2.6.1.83; LL-diaminopimelate aminotransferase [EC:2.6.1.83]		50.3212	44.8713	48.078	1.38208	85.449	59.7126	0.891699		0.0274652	EET	1.69807
H1geoA	H_contig_486	3	1130	+	376				11.2235	12.093	7.35409	3.35228	64.3219	54.0295	1.07747		0.298684		5.731	AcPro
H1geoA	H_contig_486	1133	1957	+	275	K04754	vacJ; lipoprotein		18.2229	17.6367	11.4915	13.7504	130.29	89.0648	0.967832		0.75457		7.14978	AcPro
H1geoA	H_contig_486	4727	5245	-	173			1819 (1)	51.8357	54.3182	70.7838	29.1435	310.662	88.3175	1.04789		0.562229		5.9932	AcPro
H1geoA	H_contig_487	8795	9289	+	165	K01000	mraY; phospho-N-acetylmuramoyl-pentapeptide-transferase [EC:2.7.8.13]		51.152	33.0688	38.3049	7.63914	65.1448	96.4659	0.646482		0.149342	EET	1.27356
H1geoA	H_contig_50	101	229	+	43				312.823	310.18	146.984	830.534	2395.59	77.9144	0.991554		2.65497		7.65798	AcPro
H1geoA	H_contig_50	3600	4916	+	439	K03545	tig; trigger factor		312.417	239.604	190.761	15.3131	295.86	106.118	0.766937		0.0490148	EET	0.947003
H1geoA	H_contig_50	4925	5524	+	200	K01358	clpP, CLPP; ATP-dependent Clp protease, protease subunit [EC:3.4.21.92]		258.477	278.88	221.211	12.6046	223.935	103.123	1.07894		0.0487647	EET	0.866364
H1geoA	H_contig_50	5521	6774	+	418	K03544	clpX, CLPX; ATP-dependent Clp protease ATP-binding subunit ClpX		283.313	190.001	184.279	52.2678	272.151	102.061	0.670639		0.184488	EET	0.960603
H1geoA	H_contig_50	6784	7494	+	237	K01338	lon; ATP-dependent Lon protease [EC:3.4.21.53]		67.8856	60.1145	50.0025	0	26.4565	90.9958	0.885527		ZERO	EET	0.389722
H1geoA	H_contig_50	7690	9378	+	563	K01338	lon; ATP-dependent Lon protease [EC:3.4.21.53]		59.028	57.0726	47.0094	5.22392	60.4586	79.0225	0.966872		0.088499	EET	1.02423
H1geoA	H_contig_504	3	1925	-	641	K13821	putA; proline dehydrogenase / delta 1-pyrroline-5-carboxylate dehydrogenase [EC:1.5.99.8 1.2.1.88]		11.5212	8.98515	23.4177	17.0421	65.6784	100.319	0.779883		1.4792		5.70068	AcPro
H1geoA	H_contig_5059	3	605	-	201	K00371	narH; nitrate reductase beta subunit [EC:1.7.99.4]	na (1)	17.0586	16.5892	21.618	14.6322	98.0414	85.1502	0.972485		0.857759		5.74733	AcPro
H1geoA	H_contig_5059	622	1314	-	231	K00370	narG; nitrate reductase alpha subunit [EC:1.7.99.4]		20.5521	28.8696	41.041	10.9131	139.596	86.2358	1.4047		0.530994		6.79229	AcPro
H1geoA	H_contig_509	2	295	-	98	K05773	tupB, vupB; tungstate transport system permease protein		72.6665	114.447	24.1849	8.57454	63.9815	49.6037	1.57497		0.117999	EET	0.880483
H1geoA	H_contig_509	299	1147	-	283	K05772	tupA, vupA; tungstate transport system substrate-binding protein		137.002	163.883	114.458	10.3925	256.378	72.3031	1.19621		0.0758563	EET	1.87135
H1geoA	H_contig_509	5305	5601	-	99	K06320	cgeB; spore maturation protein CgeB		0	3.06193	0	50.9276	18.0958	66.7054	∞		∞	OC	∞
H1geoA	H_contig_515	2257	4902	-	882	K01537	E3.6.3.8; Ca2+-transporting ATPase [EC:3.6.3.8]		11.3635	18.9027	21.9455	14.7673	73.1218	88.4318	1.66346		1.29954		6.43481	AcPro
H1geoA	H_contig_54	571	1260	-	230	K05799	pdhR; GntR family transcriptional regulator, transcriptional repressor for pyruvate dehydrogenase complex		6.88049	19.7694	13.7398	0	105.152	98.8354	2.87325		ZERO		15.2827	AcPro
H1geoA	H_contig_543	7576	8652	+	359	K06139	pqqE; pyrroloquinoline quinone biosynthesis protein E		154.284	173.097	133.14	11.7034	187.133	114.931	1.12194		0.0758563	EET	1.21291
H1geoA	H_contig_543	8902	9858	+	319	K01599	hemE, UROD; uroporphyrinogen decarboxylase [EC:4.1.1.37]		144.692	133.986	144.882	7.90256	210.598	101.13	0.926008		0.0546165	EET	1.45549
H1geoA	H_contig_544	3	104	-	34	K00600	glyA, SHMT; glycine hydroxymethyltransferase [EC:2.1.2.1]		54.3019	89.1561	23.2364	0	79.036	67.7497	1.64186		ZERO	EET	1.45549
H1geoA	H_contig_544	232	678	-	149	K01808	rpiB; ribose 5-phosphate isomerase B [EC:5.3.1.6]		238.97	233.96	148.464	11.2793	294.573	80.9579	0.979034		0.0471995	EET	1.23268
H1geoA	H_contig_544	682	1884	-	401	K09458	fabF; 3-oxoacyl-[acyl-carrier-protein] synthase II [EC:2.3.1.179]		433.448	413.498	315.228	25.1463	518.235	95.0177	0.953972		0.0580145	EET	1.19561
H1geoA	H_contig_544	1999	2232	-	78	K02078	acpP; acyl carrier protein		534.267	388.629	248.153	37.706	780.903	100.101	0.727406		0.0705751	EET	1.46163
H1geoA	H_contig_544	2371	3111	-	247	K00059	fabG; 3-oxoacyl-[acyl-carrier protein] reductase [EC:1.1.1.100]		149.495	120.27	121.544	5.10307	105.168	95.5755	0.804511		0.0341353	EET	0.703488
H1geoA	H_contig_544	3108	3992	-	295	K00645	fabD; [acyl-carrier-protein] S-malonyltransferase [EC:2.3.1.39]		145.734	115.087	108.463	1.42425	97.1652	84.1068	0.789704		0.00977289	EET	0.666728
H1geoA	H_contig_545	16	207	-	64	K03116	tatA; sec-independent protein translocase protein TatA		65.9381	89.9919	49.3774	13.1298	55.9839	80.7395	1.36479		0.199123	EET	0.849037
H1geoA	H_contig_545	383	832	+	150	K02485	rssB, hnr; two-component system, unclassified family, response regulator		10.5501	2.02087	13.1673	2.80102	77.6309	89.8383	0.19155		0.265497		7.35832	AcPro
H1geoA	H_contig_546	505	1974	+	490	K00088	guaB; IMP dehydrogenase [EC:1.1.1.205]		113.037	114.447	125.761	7.71709	164.524	105.834	1.01248		0.0682706	EET	1.45549
H1geoA	H_contig_546	1995	3533	+	513	K01951	guaA, GMPS; GMP synthase (glutamine-hydrolysing) [EC:6.3.5.2]		99.2285	96.9073	103.182	8.19011	99.5268	110.345	0.976608		0.0825379	EET	1.00301
H1geoA	H_contig_552	1342	2316	+	325			extK (5)	311.633	444.903	487.393	60.7605	1047.33	98.2028	1.42765		0.194974	EET	3.36077
H1geoA	H_contig_554	48	482	-	145	K02372	fabZ; 3-hydroxyacyl-[acyl-carrier-protein] dehydratase [EC:4.2.1.59]		85.4921	71.0789	38.1398	14.488	117.373	100.196	0.831409		0.169466	EET	1.37291
H1geoA	H_contig_554	558	1598	-	347	K02536	lpxD; UDP-3-O-[3-hydroxymyristoyl] glucosamine N-acyltransferase [EC:2.3.1.191]		68.4084	68.1389	56.9192	7.26489	82.6044	81.1996	0.996061		0.106199	EET	1.20752
H1geoA	H_contig_554	1777	2313	-	179	K06142	hlpA, ompH; outer membrane protein		116.405	110.075	90.4793	7.04166	180.149	92.4435	0.945627		0.060493	EET	1.54761
H1geoA	H_contig_554	5559	6809	-	417	K09808	ABC.LPT.P, lolC, lolE; lipoprotein-releasing system permease protein		56.2925	59.6084	59.6792	5.0378	90.2186	97.5621	1.05891		0.0894933	EET	1.60268
H1geoA	H_contig_554	6809	8287	-	493	K04567	KARS, lysS; lysyl-tRNA synthetase, class II [EC:6.1.1.6]		90.9491	89.1561	83.3307	5.11342	119.917	103.178	0.980286		0.0562229	EET	1.3185
H1geoA	H_contig_563	683	1642	+	320	K12686	K12686, estA, apeE, lip-1; outer membrane lipase/esterase		90.6649	87.1501	107.396	271.786	548.642	92.9012	0.961233		2.9977		6.05132	AcPro
H1geoA	H_contig_5765	3	113	-	37				14.2569	16.3854	10.6762	11.3555	96.8369	41.2678	1.1493		0.796491		6.79229	AcPro
H1geoA	H_contig_59	4865	4990	-	42				226.073	28.8696	0	10.0036	0	66.6933	0.1277	SP	0.0442495	EET	ZERO	Suc
H1geoA	H_contig_593	3	224	-	74	K00762	pyrE; orotate phosphoribosyltransferase [EC:2.4.2.10]		106.927	90.1199	90.7477	0	60.5231	91.7444	0.842821		ZERO	EET	0.566025
H1geoA	H_contig_593	221	1642	-	474	K00764	purF, PPAT; amidophosphoribosyltransferase [EC:2.4.2.14]		135.215	101.044	94.1713	7.09118	79.3695	99.5226	0.747282		0.0524438	EET	0.586988
H1geoA	H_contig_593	1731	2555	-	275	K01952	purL, PFAS; phosphoribosylformylglycinamidine synthase [EC:6.3.5.3]		103.583	87.0812	83.3132	7.63914	81.4311	84.1221	0.840692		0.0737491	EET	0.786145
H1geoA	H_contig_593	2653	5331	-	893	K01952	purL, PFAS; phosphoribosylformylglycinamidine synthase [EC:6.3.5.3]		57.2989	51.5967	72.9879	2.35248	52.1596	73.5474	0.900483		0.0410562	EET	0.910307
H1geoA	H_contig_60	4946	5809	+	288	K01362	E3.4.21.-		78.7594	102.096	115.214	26.2595	419.879	90.194	1.2963		0.333415		5.33116	AcPro
H1geoA	H_contig_611	1164	1787	+	208	K00973	E2.7.7.24, rfbA, rffH; glucose-1-phosphate thymidylyltransferase [EC:2.7.7.24]		79.8865	64.1238	36.0835	4.03993	81.8226	89.7617	0.802686		0.0505708	EET	1.02423
H1geoA	H_contig_611	1784	2272	+	163	K01790	rfbC; dTDP-4-dehydrorhamnose 3,5-epimerase [EC:5.1.3.13]		64.7245	48.3521	65.4327	0	38.4674	73.2242	0.747045		ZERO	EET	0.594326
H1geoA	H_contig_614	1071	1577	-	169				10.9247	7.17469	4.67479	355.514	540.625	91.0471	0.656743		32.5423	OC	49.4867	AcPro
H1geoA	H_contig_615	2	349	+	116	K02888	RP-L21, MRPL21, rplU; large subunit ribosomal protein L21		659.381	334.489	303.075	83.3061	1011.57	107.807	0.507278		0.12634	EET	1.53412
H1geoA	H_contig_615	422	679	+	86	K02899	RP-L27, MRPL27, rpmA; large subunit ribosomal protein L27		469.234	292.556	229.662	48.8549	687.43	98.7456	0.623477		0.104116	EET	1.465
H1geoA	H_contig_615	758	1774	+	339	K03979	obg; GTP-binding protein		70.8008	67.9585	45.4447	9.9151	95.123	107.238	0.959856		0.140042	EET	1.34353
H1geoA	H_contig_615	3005	3400	-	132	K00343	nuoN; NADH-quinone oxidoreductase subunit N [EC:1.6.5.3]		11.9887	9.18578	20.948	15.9149	61.0733	74.8912	0.766201		1.32748		5.09422	AcPro
H1geoA	H_contig_625	4006	4569	+	188	K03687	GRPE; molecular chaperone GrpE		64.5351	87.0695	81.9455	8.93942	209.642	95.5042	1.34918		0.13852	EET	3.24849
H1geoA	H_contig_625	10675	11382	-	236	K01834	PGAM, gpmA; 2,3-bisphosphoglycerate-dependent phosphoglycerate mutase [EC:5.4.2.11]		10.0584	21.8357	20.0857	17.8031	64.5238	86.7792	2.1709		1.76998		6.41494	AcPro
H1geoA	H_contig_632	1	462	+	154	K01676	E4.2.1.2A, fumA, fumB; fumarate hydratase, class I [EC:4.2.1.2]		46.2423	108.261	143.643	30.0109	494.403	102.406	2.34117		0.648992		10.6916	AcPro
H1geoA	H_contig_632	1290	1472	-	61				17.2952	4.96936	32.3786	34.4387	176.211	69.3019	0.287325		1.99123		10.1884	AcPro
H1geoA	H_contig_632	5088	5771	-	228				55.5268	57.1694	77.9644	9.21387	23.5721	84.752	1.02958		0.165936	EET	0.424518
H1geoA	H_contig_634	3	440	+	146			cbcS (4)	12.6457	6.22871	18.9393	20.1443	73.6226	89.875	0.492557		1.59298		5.82197	AcPro
H1geoA	H_contig_635	509	1057	+	183	K02030	ABC.PA.S; polar amino acid transport system substrate-binding protein		25.9428	51.35	38.8544	13.7755	244.738	45.6868	1.97935		0.530994		9.43374	AcPro
H1geoA	H_contig_635	1292	1513	+	74	K02030	ABC.PA.S; polar amino acid transport system substrate-binding protein		49.8991	40.9636	64.0572	28.3887	254.197	83.5204	0.820929		0.568922		5.09422	AcPro
H1geoA	H_contig_635	1806	2684	+	293			OmcX (11)	227.745	138.633	171.22	34.4152	987.456	104.837	0.608721		0.151113	EET	4.33579
H1geoA	H_contig_641	5634	6080	-	149	K04757	rsbW; anti-sigma B factor [EC:2.7.11.1]		15.9313	14.241	10.6045	8.45945	114.222	96.1138	0.893901		0.530994		7.16964	AcPro
H1geoA	H_contig_641	6111	6581	-	157				15.1196	30.8923	12.5802	21.409	114.107	54.624	2.0432		1.41598		7.54699	AcPro
H1geoA	H_contig_645	2123	2527	-	135	K00330	nuoA; NADH-quinone oxidoreductase subunit A [EC:1.6.5.3]		15.6298	38.172	8.77821	21.7857	92.8917	91.8601	2.44226		1.39386		5.94326	AcPro
H1geoA	H_contig_645	7043	8242	-	400	K01854	glf; UDP-galactopyranose mutase [EC:5.4.99.9]		52.7505	46.9853	43.4521	9.45343	60.4626	86.1598	0.890708		0.17921	EET	1.1462
H1geoA	H_contig_648	5449	5535	+	29				0	10.4528	13.6214	0	61.7753	63.0801	∞		∞		∞	AcPro
H1geoA	H_contig_648	5677	6126	-	150	K09770	K09770; hypothetical protein		87.9174	82.8557	42.1354	5.60203	83.6026	86.3962	0.942427		0.0637193	EET	0.950921
H1geoA	H_contig_648	6200	6400	-	67	K03704	cspA; cold shock protein (beta-ribbon, CspA family)		157.464	149.303	58.9581	6.27093	93.5849	92.0464	0.948173		0.0398245	EET	0.594326
H1geoA	H_contig_648	6557	9295	-	913	K01006	ppdK; pyruvate,orthophosphate dikinase [EC:2.7.9.1]		130.865	80.0159	114.222	11.0445	190.333	101.085	0.611438		0.0843964	EET	1.45442
H1geoA	H_contig_648	9479	11542	-	688	K01879	glyS; glycyl-tRNA synthetase beta chain [EC:6.1.1.14]		98.1404	61.243	64.3055	6.71756	117.176	100.266	0.624034		0.0684484	EET	1.19396
H1geoA	H_contig_648	11542	12420	-	293	K01878	glyQ; glycyl-tRNA synthetase alpha chain [EC:6.1.1.14]		84.6168	54.8325	41.7939	4.3019	149.8	106.311	0.64801		0.0508398	EET	1.77033
H1geoA	H_contig_648	14225	14545	+	107	K02482	K02482; two-component system, NtrC family, sensor kinase [EC:2.7.13.3]		108.459	73.6579	59.0683	19.6333	125.571	92.3527	0.679132		0.181021	EET	1.15778
H1geoA	H_contig_648	18033	18989	-	319	K00604	MTFMT, fmt; methionyl-tRNA formyltransferase [EC:2.1.2.9]		66.1448	79.8213	34.6726	13.1709	98.2789	103.411	1.20677		0.199123	EET	1.48581
H1geoA	H_contig_649	1646	1846	+	67	K03704	cspA; cold shock protein (beta-ribbon, CspA family)		511.758	456.958	147.395	81.5221	387.709	77.617	0.892918		0.159298	EET	0.757602
H1geoA	H_contig_657	1	1362	+	454	K03385	nrfA; cytochrome c-552 [EC:1.7.2.2]	nrfA (4)	46.4762	22.0337	27.8428	15.7326	341.329	54.0741	0.474087		0.338509		7.34417	AcPro
H1geoA	H_contig_661	5093	5563	+	157	K01802	E5.2.1.8; peptidylprolyl isomerase [EC:5.2.1.8]		95.7572	125.5	77.9975	16.0568	125.518	76.0125	1.31061		0.167682	EET	1.31079
H1geoA	H_contig_661	6667	7950	+	428	K01624	FBA, fbaA; fructose-bisphosphate aldolase, class II [EC:4.1.2.13]		126.946	117.569	128.289	21.5966	535.771	77.7656	0.926136		0.170124	EET	4.22045
H1geoA	H_contig_668	3	134	+	44	K03286	TC.OOP; OmpA-OmpF porin, OOP family		0	6.88933	0	219.625	142.504	70.5847	∞		∞	OC	∞	AcPro
H1geoA	H_contig_678	1394	1591	+	66	K02970	RP-S21, MRPS21, rpsU; small subunit ribosomal protein S21		887.167	496.032	383.049	101.855	1153.61	97.8653	0.559119		0.114809	EET	1.30033
H1geoA	H_contig_678	1601	2044	+	148	K09117	K09117; hypothetical protein		1051.45	659.514	507.12	124.91	1519.13	111.628	0.627246		0.118799	EET	1.4448
H1geoA	H_contig_678	2162	2722	+	187	K03558	cvpA; membrane protein required for colicin V production		112.835	74.5669	31.6861	6.74042	119.752	98.8891	0.660848		0.0597368	EET	1.0613
H1geoA	H_contig_688	1652	2008	+	119	K02884	RP-L19, MRPL19, rplS; large subunit ribosomal protein L19		246.021	178.312	165.975	45.899	301.09	85.9149	0.724784		0.186565	EET	1.22384
H1geoA	H_contig_688	12115	13083	+	323	K02523	ispB; octaprenyl-diphosphate synthase [EC:2.5.1.90]		52.2605	45.0473	35.4661	9.10547	97.0618	99.0603	0.861976		0.174232	EET	1.85727
H1geoA	H_contig_688	15792	16508	+	239	K06196	ccdA; cytochrome c-type biogenesis protein		90.4924	87.5147	92.5569	15.8216	119.932	89.1916	0.967095		0.174839	EET	1.32533
H1geoA	H_contig_689	3275	3952	-	226				284.759	312.52	223.728	29.7453	535.067	89.5056	1.09749		0.104458	EET	1.87902
H1geoA	H_contig_700	2573	3187	-	205	K11175	purN; phosphoribosylglycinamide formyltransferase 1 [EC:2.1.2.2]		84.9154	73.9343	40.4654	12.2971	83.02	93.784	0.870682		0.144817	EET	0.977679
H1geoA	H_contig_700	3204	4181	-	326	K01933	purM; phosphoribosylformylglycinamidine cyclo-ligase [EC:6.3.3.1]		99.5139	103.213	77.5498	12.8881	184.094	100.474	1.03717		0.129511	EET	1.84993
H1geoA	H_contig_700	4845	5639	+	265	K02823	pyrDII; dihydroorotate dehydrogenase electron transfer subunit		67.6798	67.4895	44.7192	1.58548	64.223	100.475	0.997187		0.0234262	EET	0.948923
H1geoA	H_contig_700	16699	16821	-	41				51.4639	22.1803	38.5385	51.2381	371.405	61.9031	0.430988		0.995613		7.21681	AcPro
H1geoA	H_contig_700	19605	21176	+	524	K00936	E2.7.3.-		9.56354	9.2559	6.78469	8.82	94.0187	90.475	0.967832		0.922252		9.83095	AcPro
H1geoA	H_contig_700	21173	21472	-	100				5.27505	9.09392	0	4.20153	322.467	86.0647	1.72395		0.796491		61.1306	AcPro
H1geoA	H_contig_710	5624	5866	+	81				270.265	449.083	209.702	82.9931	2532.41	113.484	1.66164		0.307081		9.37009	AcPro
H1geoA	H_contig_711	1921	2121	-	67	K03704	cspA; cold shock protein (beta-ribbon, CspA family)		692.842	393.618	159.187	43.8965	240.647	84.2258	0.56812		0.0633572	EET	0.347333
H1geoA	H_contig_712	3	944	+	314	K01873	VARS, valS; valyl-tRNA synthetase [EC:6.1.1.9]		52.9185	49.2346	47.8049	4.0142	96.9911	68.9806	0.930386		0.0758563	EET	1.83284
H1geoA	H_contig_716	4305	4925	+	207	K01817	trpF; phosphoribosylanthranilate isomerase [EC:5.3.1.24]		76.4499	134.725	131.673	14.2081	199.054	86.6025	1.76226		0.185848	EET	2.60371
H1geoA	H_contig_716	4997	5353	+	119	K00058	serA, PHGDH; D-3-phosphoglycerate dehydrogenase [EC:1.1.1.95]		197.26	188.501	149.377	0	143.018	95.6494	0.955598		ZERO	EET	0.72502
H1geoA	H_contig_717	3	1292	+	430	K00058	serA, PHGDH; D-3-phosphoglycerate dehydrogenase [EC:1.1.1.95]		230.63	252.374	192.916	14.6565	181.231	65.8651	1.09428		0.0635498	EET	0.785811
H1geoA	H_contig_717	1611	2678	-	356	K01626	E2.5.1.54, aroF, aroG, aroH; 3-deoxy-7-phosphoheptulonate synthase [EC:2.5.1.54]		282.274	143.05	120.947	10.6218	324.581	87.599	0.506778		0.0376295	EET	1.14988
H1geoA	H_contig_717	2829	3461	-	211	K08281	pncA; nicotinamidase/pyrazinamidase [EC:3.5.1.19 3.5.1.-]		7.50007	4.30992	11.2328	13.9387	50.9427	68.653	0.57465		1.85848		6.79229	AcPro
H1geoA	H_contig_724	666	845	-	60				74.7298	50.5218	52.6693	0	119.432	81.2917	0.676059		ZERO	EET	1.59819
H1geoA	H_contig_724	4190	4363	-	58				54.5694	10.4528	13.6214	14.488	46.3315	80.5696	0.19155	SP	0.265497		0.849037
H1geoA	H_contig_732	4430	5269	-	280	K00433	E1.11.1.10, cpo; chloride peroxidase [EC:1.11.1.10]		30.1431	28.1479	16.9294	54.0196	159.954	102.77	0.933807		1.7921		5.30648	AcPro
H1geoA	H_contig_732	10810	13230	-	807	K03406	mcp; methyl-accepting chemotaxis protein		78.1125	57.0953	83.703	10.9333	36.6288	94.3957	0.730936		0.139969	EET	0.468924
H1geoA	H_contig_732	16561	16980	-	140				182.743	236.009	276.514	420.153	1484.37	94.5806	1.29148		2.29915		8.12274	AcPro
H1geoA	H_contig_733	4372	4686	-	105	K09747	K09747; hypothetical protein		75.3578	57.7392	33.8588	4.00145	196.21	95.2791	0.766201		0.0530994	EET	2.60371
H1geoA	H_contig_733	7128	7466	-	113				77.025	50.9689	76.9064	29.7453	7.92692	93.0633	0.661719		0.386177		0.102914	Suc
H1geoA	H_contig_741	7062	8315	+	418	K01586	lysA; diaminopimelate decarboxylase [EC:4.1.1.20]		18.2986	16.6794	10.3952	11.0566	105.003	115.068	0.911514		0.604234		5.73832	AcPro
H1geoA	H_contig_741	9396	10124	+	243	K00215	dapB; 4-hydroxy-tetrahydrodipicolinate reductase [EC:1.17.1.8]		55.3554	42.4134	26.0095	3.45805	70.0374	107.156	0.766201		0.0624699	EET	1.26523
H1geoA	H_contig_747	8297	9307	-	337	K08679	E5.1.3.6; UDP-glucuronate 4-epimerase [EC:5.1.3.6]		67.3077	61.1658	41.0258	2.49349	71.7656	86.1519	0.908749		0.0370461	EET	1.06623
H1geoA	H_contig_751	3	209	-	69				3.8225	8.7864	22.8997	6.08917	116.836	71.4916	2.2986		1.59298		30.5653	AcPro
H1geoA	H_contig_751	231	1223	-	331	K07080	K07080		9.56202	18.3161	19.0946	10.1547	89.3035	70.8742	1.9155		1.06199		9.3394	AcPro
H1geoA	H_contig_76	1	867	+	289	K00031	IDH1, IDH2, icd; isocitrate dehydrogenase [EC:1.1.1.42]		49.2824	111.183	203.661	39.253	1314.17	101.358	2.25603		0.796491		26.666	AcPro
H1geoA	H_contig_76	933	1886	+	318	K00024	mdh; malate dehydrogenase [EC:1.1.1.37]		238.041	373.671	568.927	112.305	3597.05	108.984	1.56978		0.471789		15.1111	AcPro
H1geoA	H_contig_76	2063	2254	+	64	K00176	korD; 2-oxoglutarate ferredoxin oxidoreductase subunit delta [EC:1.2.7.3]	na (1)	140.118	198.93	265.404	91.9084	2099.39	94.6642	1.41972		0.655934		14.983	AcPro
H1geoA	H_contig_761	3956	4138	+	61				0	9.93871	32.3786	0	73.4214	80.6664	∞		∞		∞	AcPro
H1geoA	H_contig_761	5043	5672	+	210				17.5835	23.0957	24.4536	14.0051	110.901	84.9589	1.31349		0.796491		6.30713	AcPro
H1geoA	H_contig_775	2550	3227	-	226	K00145	argC; N-acetyl-gamma-glutamyl-phosphate reductase [EC:1.2.1.38]		53.6841	56.334	45.4447	9.29541	83.2326	81.3603	1.04936		0.17315	EET	1.55041
H1geoA	H_contig_778	3	2456	-	818	K01682	acnB; aconitate hydratase 2 / 2-methylisocitrate dehydratase [EC:4.2.1.3 4.2.1.99]		66.0993	178.247	267.532	38.0089	1251.63	101.698	2.69665		0.575027		18.9356	AcPro
H1geoA	H_contig_778	3515	4972	-	486	K00135	E1.2.1.16, gabD; succinate-semialdehyde dehydrogenase (NADP+) [EC:1.2.1.16]		11.3967	32.4337	26.8223	17.2902	103.213	77.951	2.84589		1.51713		9.05639	AcPro
H1geoA	H_contig_781	468	1166	-	233				55.4672	36.4277	33.9073	3.60646	65.3545	86.9634	0.656743		0.0650197	EET	1.17826
H1geoA	H_contig_787	2	91	-	30	K00645	fabD; [acyl-carrier-protein] S-malonyltransferase [EC:2.3.1.39]		114.293	20.2087	92.1712	0	119.432	71.1962	0.176816	SP	ZERO	EET	1.04497
H1geoA	H_contig_787	231	1211	-	327	K00648	fabH; 3-oxoacyl-[acyl-carrier-protein] synthase III [EC:2.3.1.180]		205.678	171.496	148.585	1.28487	158.878	93.0527	0.833806		0.00624699	EET	0.772457
H1geoA	H_contig_787	1208	2245	-	346	K03621	plsX; glycerol-3-phosphate acyltransferase PlsX [EC:2.3.1.15]		251.556	236.547	115.309	6.07157	308.073	109.523	0.940337		0.0241361	EET	1.22467
H1geoA	H_contig_787	2514	3050	-	179	K07040	K07040; uncharacterized protein		191.552	128.704	88.2725	18.7778	310.257	97.8479	0.671899		0.0980296	EET	1.6197
H1geoA	H_contig_788	1890	2672	+	261			cbcX (5)	35.3691	52.2639	62.0529	19.3174	202.486	93.3407	1.47767		0.546165		5.72493	AcPro
H1geoA	H_contig_791	850	2151	+	434	K02492	hemA; glutamyl-tRNA reductase [EC:1.2.1.70]		89.9432	75.4335	53.7008	8.71284	107.324	83.1968	0.838679		0.0968705	EET	1.19324
H1geoA	H_contig_796	1098	5681	-	1528	K00284	E1.4.7.1; glutamate synthase (ferredoxin) [EC:1.4.7.1]		66.4559	84.1148	70.0591	12.3736	94.3812	106.154	1.26572		0.186193	EET	1.42021
H1geoA	H_contig_8	6324	6878	+	185	K00540	E1.-.-.-		41.345	58.9876	70.4629	68.1328	397.031	91.1133	1.42672		1.64791		9.6029	AcPro
H1geoA	H_contig_8	12792	15551	+	920			omcA (10)	1.14675	1.31796	0.429369	67.1331	321.299	89.0754	1.1493		58.5421	OC	280.182	AcPro
H1geoA	H_contig_8	15573	15791	-	73				0	0	0	11.511	110.434	84.7483	∞		∞		∞	AcPro
H1geoA	H_contig_8	15811	16950	+	380				1.38817	0	0	25.4303	122.575	88.3927	ZERO		18.3193		88.2998	AcPro
H1geoA	H_contig_8	16950	17384	+	145			extCF (5)	1.81898	2.09056	0	40.5665	123.551	88.6625	1.1493		22.3017		67.9229	AcPro
H1geoA	H_contig_8	17408	18214	+	269			extG (2)	0	2.25376	1.46847	18.7429	109.887	84.3634	∞		∞		∞	AcPro
H1geoA	H_contig_8	23136	25598	-	821			omcA (7)	156.452	135.873	178.986	54.758	852.1	12.1496	0.868465		0.349998		5.44639	AcPro
H1geoA	H_contig_808	1628	2098	+	157				57.1183	63.7154	47.8049	8.02839	108.402	103.383	1.1155		0.140557	EET	1.89785
H1geoA	H_contig_814	1783	2802	+	340	K13694	spr; lipoprotein Spr		75.247	57.9515	26.7219	1.23574	52.6907	99.0776	0.77015		0.0164225	EET	0.700237
H1geoA	H_contig_814	4618	4785	-	56				659.381	470.935	592.529	22.5082	1087.69	78.5708	0.714208		0.0341353	EET	1.64956
H1geoA	H_contig_814	4966	5190	-	75				1002.26	812.39	368.685	28.0102	1528.73	92.0846	0.810559		0.027947	EET	1.52529
H1geoA	H_contig_814	11216	12061	-	282	K02535	lpxC; UDP-3-O-[3-hydroxymyristoyl] N-acetylglucosamine deacetylase [EC:3.5.1.108]		130.941	313.88	296.965	171.339	797.274	101.073	2.39711		1.30852		6.08881	AcPro
H1geoA	H_contig_814	12254	13939	-	562	K03688	ubiB, aarF; ubiquinone biosynthesis protein		12.2021	18.3389	16.8692	37.3801	73.3169	100.519	1.50293		3.06343		6.00857	AcPro
H1geoA	H_contig_814	13927	14259	-	111				16.633	13.6545	67.6159	79.4883	112.976	74.5031	0.820929		4.77894		6.79229	AcPro
H1geoA	H_contig_8297	2	676	-	225	K00029	E1.1.1.40, maeB; malate dehydrogenase (oxaloacetate-decarboxylating)(NADP+) [EC:1.1.1.40]		4.68893	14.8197	24.579	1.86734	99.5268	69.1525	3.16058		0.398245		21.2259	AcPro
H1geoA	H_contig_836	1988	4030	-	681	K15987	hppA; K(+)-stimulated pyrophosphate-energized sodium pump [EC:3.6.1.1]		300.159	199.416	230.863	8.02053	314.365	90.3812	0.66437		0.026721	EET	1.04733
H1geoA	H_contig_853	3775	3867	-	31				8.50814	48.8921	25.4851	0	57.7898	69.3964	5.7465		ZERO		6.79229	AcPro
H1geoA	H_contig_857	2	907	+	302	K01362	E3.4.21.-		175.544	147.55	142.573	6.95617	115.675	89.0084	0.840533		0.0396264	EET	0.658954
H1geoA	H_contig_857	1218	2351	+	378	K01362	E3.4.21.-		86.5219	87.4107	62.7015	2.22303	59.2422	84.872	1.01027		0.0256933	EET	0.684707
H1geoA	H_contig_860	3	1199	+	399	K00013	hisD; histidinol dehydrogenase [EC:1.1.1.23]		52.8827	44.0641	51.4812	7.3711	53.8792	76.5872	0.833243		0.139386	EET	1.01884
H1geoA	H_contig_860	1243	1830	+	196	K01693	E4.2.1.19, hisB; imidazoleglycerol-phosphate dehydratase [EC:4.2.1.19]		55.1727	54.1305	62.4776	8.57454	105.113	107.093	0.98111		0.155413	EET	1.90516
H1geoA	H_contig_879	81	1148	-	356	K01262	pepP; Xaa-Pro aminopeptidase [EC:3.4.11.9]		62.2337	48.535	36.617	9.44163	105.677	92.4632	0.779883		0.151713	EET	1.69807
H1geoA	H_contig_879	1170	1619	-	150	K03786	aroQ, qutE; 3-dehydroquinate dehydratase II [EC:4.2.1.10]		22.8585	14.1461	18.4342	5.60203	131.375	93.5716	0.618854		0.245074		5.74733	AcPro
H1geoA	H_contig_879	6405	10565	-	1387	K01238	E3.2.1.-		56.6678	49.8297	48.1314	7.87597	131.746	62.0063	0.879331		0.138985	EET	2.32488
H1geoA	H_contig_879	11204	11353	-	50	K02666	pilQ; type IV pilus assembly protein PilQ		52.7505	30.3131	47.4023	8.40305	71.6593	41.2808	0.57465		0.159298	EET	1.35846
H1geoA	H_contig_891	466	666	+	67				7.8732	9.04868	11.7916	0	53.4771	90.1509	1.1493		ZERO		6.79229	AcPro
H1geoA	H_contig_891	784	1827	+	348	K00060	tdh; threonine 3-dehydrogenase [EC:1.1.1.103]		15.9161	21.7766	26.1076	16.9027	95.2369	92.1574	1.36822		1.06199		5.98369	AcPro
H1geoA	H_contig_891	1834	2298	+	155	K00639	kbl, GCAT; glycine C-acetyltransferase [EC:2.3.1.29]		13.613	21.5125	22.9366	27.1066	92.4637	87.0249	1.58029		1.99123		6.79229	AcPro
H1geoA	H_contig_897	3	425	-	141	K06142	hlpA, ompH; outer membrane protein		52.3763	64.4959	42.0233	5.95961	95.2917	79.8546	1.23139		0.113784	EET	1.81936
H1geoA	H_contig_904	15	626	+	204	K02664	pilO; type IV pilus assembly protein PilO		15.5148	11.8875	21.3001	8.23829	109.772	41.0193	0.766201		0.530994		7.07531	AcPro
H1geoA	H_contig_904	631	1134	+	168	K02665	pilP; type IV pilus assembly protein PilP		10.9897	18.0435	28.2157	32.5118	122.631	38.4361	1.64186		2.95839		11.1588	AcPro
H1geoA	H_contig_905	86	238	-	51	K02913	RP-L33, MRPL33, rpmG; large subunit ribosomal protein L33		377.528	178.312	170.401	32.9531	263.453	92.1071	0.472315		0.0872867	EET	0.697838
H1geoA	H_contig_905	303	530	-	76	K02358	tuf, TUFM; elongation factor Tu		881.488	510.536	649.703	66.3399	1626.48	157.505	0.579175		0.075259	EET	1.84515
H1geoA	H_contig_907	4756	5091	+	112	K03553	recA; recombination protein RecA		75.3578	89.3153	45.8505	0	119.965	54.1031	1.18522		ZERO	EET	1.59194
H1geoA	H_contig_932	1871	2617	+	249	K02030	ABC.PA.S; polar amino acid transport system substrate-binding protein		195.961	143.652	120.568	10.1242	762.639	94.7161	0.733068		0.0516643	EET	3.8918
H1geoA	H_contig_932	2759	3544	+	262	K02029	ABC.PA.P; polar amino acid transport system permease protein		61.408	38.1806	24.1233	0	133.336	87.9178	0.621753		ZERO	EET	2.17131
H1geoA	H_contig_950	2080	3123	+	348	K03639	MOCS1, moaA; molybdenum cofactor biosynthesis protein		69.7276	80.138	51.0801	9.65868	90.089	89.6141	1.1493		0.13852	EET	1.29201
H1geoA	H_contig_961	3	341	+	113				11.6705	8.04772	20.9745	7.43633	79.2692	33.6628	0.68958		0.637193		6.79229	AcPro
H1geoA	H_contig_961	4820	4999	+	60				21.9794	20.2087	13.1673	1855.67	492.658	87.1038	0.919441		84.428	OC	22.4146	AcPro
H1geoA	H_contig_961	5399	5548	+	50				0	0	0	16.8061	53.7445	73.7774	∞		∞		∞	AcPro
H1geoA	H_contig_962	1716	3311	+	532	K00278	nadB; L-aspartate oxidase [EC:1.4.3.16]		87.7522	116.808	106.18	9.47713	171.74	98.4802	1.33111		0.107999	EET	1.9571
H1geoA	H_contig_962	3319	3594	+	92	K04093	pheA1; chorismate mutase [EC:5.4.99.5]		31.5356	92.2572	107.342	4.56688	214.199	83.8775	2.92549		0.144817		6.79229	AcPro
H1geoA	H_contig_966	548	1090	+	181	K00936	E2.7.3.-		13.1148	11.7233	21.8243	6.96385	108.875	38.1884	0.893901		0.530994		8.30169	AcPro
H1geoA	H_contig_966	2307	2681	+	125	K02485	rssB, hnr; two-component system, unclassified family, response regulator		27.4302	21.8254	50.5625	0	164.816	60.0484	0.79567		ZERO		6.00857	AcPro
H1geoA	H_contig_966	5298	7493	+	732	K06044	treY, glgY; (1->4)-alpha-D-glucan 1-alpha-D-glucosylmutase [EC:5.4.99.15]		11.8905	29.8161	26.9822	16.6454	102.79	92.0933	2.50757		1.39989		8.64474	AcPro
H1geoA	H_contig_966	7577	9037	+	487	K00703	E2.4.1.21, glgA; starch synthase [EC:2.4.1.21]		11.9149	21.7856	17.0337	3.45095	73.5722	95.7413	1.82843		0.289633		6.17481	AcPro
H1geoA	H_contig_966	9278	10303	-	342				95.6295	104.589	122.433	12.2852	199.054	95.0897	1.09369		0.128466	EET	2.08151
H1geoA	H_contig_966	12299	12562	-	88				53.9493	41.336	31.422	4.77446	122.147	93.7623	0.766201		0.088499	EET	2.2641
H1geoA	H_contig_968	541	2061	+	507	K02652	pilB; type IV pilus assembly protein PilB		59.3053	47.8313	35.84	8.28703	61.8362	81.6453	0.806527		0.139735	EET	1.04268
H1geoA	H_contig_968	2453	3505	+	351	K02669	pilT; twitching motility protein PilT		124.738	114.861	79.9042	11.9702	158.222	88.5946	0.920825		0.0959627	EET	1.26844
H1geoA	H_contig_97	4934	6271	+	446	K03286	TC.OOP; OmpA-OmpF porin, OOP family		4.13961	0	0.885694	311.817	329.376	90.0493	ZERO		75.3253	OC	79.5669	AcPro
H1geoA	H_contig_970	344	847	+	168	K01653	E2.2.1.6S, ilvH, ilvN; acetolactate synthase I/III small subunit [EC:2.2.1.6]		51.8085	61.3479	89.3496	10.0036	74.6451	100.949	1.18413		0.193089	EET	1.44079
H1geoA	H_contig_970	963	1622	+	220	K01613	psd, PISD; phosphatidylserine decarboxylase [EC:4.1.1.65]		91.1144	64.7597	30.5242	1.90978	52.9302	97.3057	0.710752		0.0209603	EET	0.58092
H1geoA	H_contig_970	1619	1744	+	42	K17103	CHO1, pssA; CDP-diacylglycerol---serine O-phosphatidyltransferase [EC:2.7.8.8]		6.27982	7.2174	9.40523	10.0036	63.9815	79.8714	1.1493		1.59298		10.1884	AcPro
H1geoA	H_contig_984	2435	3175	-	247	K00240	sdhB; succinate dehydrogenase iron-sulfur subunit [EC:1.3.99.1]		53.3912	126.407	163.125	45.9276	1410.7	94.4915	2.36756		0.86021		26.422	AcPro
H1geoA	H_contig_984	3175	5088	-	638	K00239	sdhA; succinate dehydrogenase flavoprotein subunit [EC:1.3.99.1]		73.5861	139.212	229.087	35.5615	1787.27	106.907	1.89183		0.483264		24.2882	AcPro
H1geoA	H_contig_984	5098	5724	-	209	K00241	sdhC; succinate dehydrogenase cytochrome b556 subunit		68.1465	117.481	230.586	16.0824	1504.33	105.391	1.72395		0.235997		22.075	AcPro
H1geoA	H_contig_986	822	1355	+	178	K02825	pyrR; pyrimidine operon attenuation protein / uracil phosphoribosyltransferase [EC:2.4.2.9]		69.6425	69.8222	22.1921	2.36041	110.71	99.9598	1.00258		0.0338932	EET	1.58969
H1geoA	H_contig_986	1458	1583	+	42	K00609	pyrB, PYR2; aspartate carbamoyltransferase catalytic subunit [EC:2.1.3.2]		62.7982	72.174	65.8366	0	63.9815	73.3354	1.1493		ZERO	EET	1.01884
H1geoA	H_contig_987	3166	4359	-	398	K11358	yhdR; aspartate aminotransferase [EC:2.6.1.1]		60.3052	50.2679	58.5582	9.50094	76.5206	91.7713	0.833559		0.157548	EET	1.26889
H1geoA	H_contig_987	4539	5822	+	428	K01740	E2.5.1.49, metY; O-acetylhomoserine (thiol)-lyase [EC:2.5.1.49]		60.3919	57.3682	57.2224	3.92666	136.036	92.8112	0.949932		0.0650197	EET	2.25255
H1geoA	H_contig_987	5997	6485	-	163	K09858	K09858; SEC-C motif domain protein		147.248	133.898	79.9733	15.4657	225.309	100.164	0.909337		0.105032	EET	1.53013
H1geoA	H_contig_987	6520	6816	-	99				119.887	85.7339	39.901	0	99.5268	97.0666	0.71512		ZERO	EET	0.830169
H1geoA	H_contig_987	7785	8024	+	80	K05919	E1.15.1.2; superoxide reductase [EC:1.15.1.2]		102.204	109.885	49.3774	36.7633	571.035	72.8414	1.07515		0.359706		5.58721	AcPro
H1geoA	H_contig_989	1	1080	+	360	K01956	carA, CPA1; carbamoyl-phosphate synthase small subunit [EC:6.3.5.5]		93.046	115.358	104.241	11.6709	164.219	102.794	1.2398		0.125432	EET	1.76493
H1geoA	H_contig_989	1101	2009	+	303	K04070	pflX; putative pyruvate formate lyase activating enzyme [EC:1.97.1.4]		52.2282	59.0255	48.2367	6.93321	59.1249	103.417	1.13015		0.132748	EET	1.13205
H1geoA	H_contig_989	2125	5373	+	1083	K01955	carB, CPA2; carbamoyl-phosphate synthase large subunit [EC:6.3.5.5]		96.1977	81.4506	72.9491	7.75905	70.3029	101.328	0.8467		0.0806573	EET	0.730816
H1geoA	H_contig_989	5476	5952	+	159	K03624	greA; transcription elongation factor GreA		119.435	165.864	99.376	5.28494	174.641	103.35	1.38874		0.0442495	EET	1.46223
H1geoA	H_contig_989	6075	6272	+	66	K00378	: No such data.		67.9362	124.008	41.896	12.7319	108.575	93.0468	1.82536		0.18741	EET	1.59819
H1geoA	H_contig_994	3	347	+	115	K06149	uspA; universal stress protein A		277.513	276.772	288.536	624.749	1409.82	86.1729	0.997327		2.25124		5.08019	AcPro
H1geoA	H_contig_994	436	1626	+	397	K00936	E2.7.3.-		44.5124	68.7198	47.7605	17.9914	241.422	104.499	1.54384		0.404189		5.4237	AcPro
H1geoA	H_contig_994	1699	2106	+	136	K02483	K02483; two-component system, OmpR family, response regulator		65.9381	42.3491	49.3774	12.3574	105.381	87.2692	0.642256		0.18741	EET	1.59819
H1geoA	H_contig_994	4913	5542	+	210	K01069	E3.1.2.6, gloB; hydroxyacylglutathione hydrolase [EC:3.1.2.6]		52.7505	49.0783	37.6209	2.00073	46.9198	84.8475	0.930386		0.0379281	EET	0.889467
H1geoA	H_contig_994	9000	9314	+	105	K04065	osmY; hyperosmotically inducible periplasmic protein		25.1193	14.4348	11.2863	152.055	153.556	90.6355	0.57465		6.05333	OC	6.11306	AcPro
H1geoA	H_contig_996	1830	2075	+	82				3.21649	7.39343	4.81731	133.219	32.771	67.361	2.2986		41.4175	OC	10.1884
H1geoB	H_contig_10	850	1455	+	202	K00384	E1.8.1.9, trxB; thioredoxin reductase (NADPH) [EC:1.8.1.9]		54.6184	56.3045	39.0027	7.7876	143.502	51.8439	1.03087		0.142582	EET	2.62736
H1geoB	H_contig_1035	5384	6307	-	308	K01710	E4.2.1.46, rfbB, rffG; dTDP-glucose 4,6-dehydratase [EC:4.2.1.46]		9.16355	5.53905	17.0531	6.38431	62.7434	91.1538	0.604465		0.696707		6.84706	AcPro
H1geoB	H_contig_1035	8138	8536	-	133	K03774	slpA; FKBP-type peptidyl-prolyl cis-trans isomerase SlpA [EC:5.2.1.8]		7.71668	23.5167	11.8474	17.7417	72.6502	79.7584	3.04751		2.29913		9.41471	AcPro
H1geoB	H_contig_1085	3	581	+	193	K03406	mcp; methyl-accepting chemotaxis protein		85.0834	78.0824	65.3144	8.15075	89.0039	50.8069	0.917717		0.0957972	EET	1.04608
H1geoB	H_contig_1106	6168	6731	-	188	K02356	efp; elongation factor P		133.749	120.995	108.959	2.09188	148.478	110.625	0.904642		0.0156404	EET	1.11012
H1geoB	H_contig_1106	6887	7105	-	73	K02518	infA; translation initiation factor IF-1		56.2366	85.6909	28.7801	5.38731	102.949	94.9058	1.52376		0.0957972	EET	1.83064
H1geoB	H_contig_1116	2310	2981	+	224				1.14544	1.26937	2.3448	15.8012	62.3077	54.0981	1.10819		13.7948		54.3961	AcPro
H1geoB	H_contig_1132	205	1209	-	335	K07792	dcuB; anaerobic C4-dicarboxylate transporter DcuB		558.348	904.789	600.494	1536.7	19.2288	50.0964	1.62048		2.75223		0.0344388	Suc
H1geoB	H_contig_1159	10037	10579	-	181	K00343	nuoN; NADH-quinone oxidoreductase subunit N [EC:1.6.5.3]		73.7134	163.376	223.443	39.1101	504.181	55.7892	2.21637		0.530569		6.83974	AcPro
H1geoB	H_contig_1165	1297	1986	-	230	K01362	E3.4.21.-		53.547	42.0326	27.4036	10.2593	74.6858	58.1741	0.784965		0.191594	EET	1.39477
H1geoB	H_contig_1283	5872	6945	-	358	K00826	E2.6.1.42, ilvE; branched-chain amino acid aminotransferase [EC:2.6.1.42]		146.207	156.465	139.378	13.1824	305.889	50.343	1.07016		0.0901621	EET	2.09216
H1geoB	H_contig_1283	7172	8062	+	297	K03089	SIG3.3.1, rpoH; RNA polymerase sigma-32 factor		46.6508	108.182	267.039	79.4492	310.877	58.0591	2.31898		1.70306		6.66391	AcPro
H1geoB	H_contig_1286	1049	1528	+	160				8.01811	12.4398	29.5445	108.15	114.071	52.195	1.55146		13.4883	OC	14.2267	AcPro
H1geoB	H_contig_1286	17003	19972	+	990	K15371	GDH2; glutamate dehydrogenase [EC:1.4.1.2]		14.5136	25.8489	49.3404	36.1494	99.7697	91.6897	1.78101		2.49073		6.87423	AcPro
H1geoB	H_contig_1296	1386	2234	+	283	K00528	E1.18.1.2, fpr; ferredoxin--NADP+ reductase [EC:1.18.1.2]		125.117	192.908	170.748	20.8449	22.762	103.644	1.54182		0.166604	EET	0.181927	Suc
H1geoB	H_contig_1296	2470	3828	+	453	K00266	gltD; glutamate synthase (NADPH/NADH) small chain [EC:1.4.1.13 1.4.1.14]		79.8625	134.951	108.989	9.54969	18.96	55.7835	1.68979		0.119577	EET	0.237408
H1geoB	H_contig_1301	3	392	+	130	K07792	dcuB; anaerobic C4-dicarboxylate transporter DcuB		5.92107	8.74886	8.08056	462.853	0	47.4549	1.47758		78.1705	OC	ZERO
H1geoB	H_contig_1301	460	3174	+	905	K15371	GDH2; glutamate dehydrogenase [EC:1.4.1.2]		12.1911	2.82767	4.0626	409.787	3.55893	56.633	0.231946		33.6137	OC	0.291929
H1geoB	H_contig_1301	3365	3547	+	61	K15371	GDH2; glutamate dehydrogenase [EC:1.4.1.2]		12.6187	9.32255	8.61043	483.533	0	67.8339	0.738791		38.3189	OC	ZERO
H1geoB	H_contig_1323	2	250	-	83				6.18264	10.2773	18.9844	18.9529	77.6103	42.5715	1.66228		3.06551		12.5529	AcPro
H1geoB	H_contig_1323	247	1005	-	253				10.1415	14.6102	12.4562	46.6332	80.6268	49.8516	1.44064		4.59827		7.9502	AcPro
H1geoB	H_contig_1339	209	1300	+	364	K00605	gcvT, AMT; aminomethyltransferase [EC:2.1.2.10]		20.4418	26.559	49.0605	14.0455	147.474	91.6316	1.29925		0.687097		7.21433	AcPro
H1geoB	H_contig_1339	1351	1722	+	124	K02437	gcvH, GCSH; glycine cleavage system H protein		8.27676	16.0513	42.3578	12.6862	190.479	71.992	1.93933		1.53276		23.0137	AcPro
H1geoB	H_contig_1339	1725	3062	+	446	K00282	gcvPA; glycine dehydrogenase subunit 1 [EC:1.4.4.2]		22.4363	31.8764	43.5734	19.3992	211.833	59.0238	1.42075		0.864631		9.44153	AcPro
H1geoB	H_contig_1347	2	292	-	97	K03701	uvrA; excinuclease ABC subunit A		7.93545	26.3819	43.3185	8.10874	77.4769	84.542	3.32456		1.02184		9.7634	AcPro
H1geoB	H_contig_1365	1	132	-	44	K04758	feoA; ferrous iron transport protein A		303.23	0	0	0	24.4002	34.4586	ZERO	SP	ZERO	EET	0.0804676	Suc
H1geoB	H_contig_1365	179	1612	-	478	K07267	oprB; porin		325.824	14.8712	3.29646	3.29099	8.98418	55.074	0.0456419	SP	0.0101005	EET	0.0275737	Suc
H1geoB	H_contig_1411	2	805	+	268	K02406	fliC; flagellin		1423.63	1184.03	1803.05	250.932	897.345	69.6506	0.831699		0.176262	EET	0.63032
H1geoB	H_contig_1426	7881	8291	+	137				5.61853	18.6791	0	17.2237	62.6925	64.0002	3.32456		3.06551		11.1582	AcPro
H1geoB	H_contig_1446	434	1552	+	373				1.37576	3.0492	7.0407	21.0871	126.646	50.6131	2.21637		15.3276		92.0549	AcPro
H1geoB	H_contig_1446	2041	2367	+	109				7.06182	2.6086	9.63736	3.60802	59.0977	43.2543	0.369395		0.510919		8.36863	AcPro
H1geoB	H_contig_1461	2	2401	-	800	K00123	E1.2.1.2A; formate dehydrogenase, alpha subunit [EC:1.2.1.2]		321.687	161.006	172.015	3.44114	14.7621	50.8938	0.500507		0.0106972	EET	0.0458898	Suc
H1geoB	H_contig_1461	2450	3022	-	191	K00123	E1.2.1.2A; formate dehydrogenase, alpha subunit [EC:1.2.1.2]		349.271	141.425	109.997	0	28.1049	65.9553	0.404914		ZERO	EET	0.0804676	Suc
H1geoB	H_contig_1479	238	738	-	167	K00532	E1.12.7.2; ferredoxin hydrogenase [EC:1.12.7.2]		79.893	80.0232	31.4513	11.7747	51.4304	53.3658	1.00163		0.14738	EET	0.643741
H1geoB	H_contig_1517	662	1006	-	115	K00762	pyrE; orotate phosphoribosyltransferase [EC:2.4.2.10]		69.1649	103.845	68.5091	10.2593	93.3573	46.7459	1.50141		0.148331	EET	1.34978
H1geoB	H_contig_1528	2	97	+	32				8.01811	17.7711	0	12.2898	67.1006	45.8685	2.21637		1.53276		8.36863	AcPro
H1geoB	H_contig_1528	397	3432	+	1012	K03406	mcp; methyl-accepting chemotaxis protein		207.9	109.296	95.4975	7.3836	32.8872	54.2383	0.525713		0.0355151	EET	0.158187	Suc
H1geoB	H_contig_1542	1970	2122	+	51				55.3407	22.301	30.8963	7.71125	126.307	48.1042	0.402977		0.139341	EET	2.28235
H1geoB	H_contig_1549	3	137	+	45	K00215	dapB; 4-hydroxy-tetrahydrodipicolinate reductase [EC:1.17.1.8]		11.4035	25.2745	11.6719	0	71.5739	51.036	2.21637		ZERO		6.27647	AcPro
H1geoB	H_contig_1583	118	534	+	139	K02114	ATPF1E, atpC; F-type H+-transporting ATPase subunit epsilon [EC:3.6.3.14]		180.898	126.827	154.926	28.2931	193.095	62.6544	0.701097		0.156404	EET	1.06743
H1geoB	H_contig_159	2417	2557	+	47				70.9688	0	44.701	8.36753	114.214	61.2964	ZERO	SP	0.117904	EET	1.60935
H1geoB	H_contig_1595	4510	4725	-	72				32.0724	59.2371	189.669	76.4699	223.669	86.551	1.84698		2.38429		6.97386	AcPro
H1geoB	H_contig_1609	2213	2566	-	118				4.34881	24.0964	31.1581	13.3313	81.8854	52.4074	5.54093		3.06551		18.8294	AcPro
H1geoB	H_contig_1612	598	1137	+	180				8.55265	12.6372	8.75394	30.588	59.6449	43.1182	1.47758		3.57643		6.97386	AcPro
H1geoB	H_contig_1612	3536	4024	-	163				36.2045	43.6101	122.448	86.858	658.656	98.247	1.20455		2.3991		18.1927	AcPro
H1geoB	H_contig_1619	481	1599	+	373				167.843	299.584	235.159	10.5435	123.767	54.1462	1.78491		0.0628179	EET	0.7374
H1geoB	H_contig_1633	3	92	+	30				25.658	255.904	367.665	26.2182	322.083	15.6701	9.97368	SP+	1.02184		12.5529	AcPro
H1geoB	H_contig_1633	471	1019	+	183	K03442	mscS; small conductance mechanosensitive channel		26.6394	31.0752	37.3119	19.3413	134.934	51.1718	1.16651		0.726042		5.06522	AcPro
H1geoB	H_contig_1656	2	1360	-	453	K01869	LARS, leuS; leucyl-tRNA synthetase [EC:6.1.1.4]		55.5073	54.6079	49.8569	3.47262	94.7999	50.4365	0.983798		0.0625615	EET	1.70788
H1geoB	H_contig_1678	3	116	+	38	K01682	acnB; aconitate hydratase 2 / 2-methylisocitrate dehydratase [EC:4.2.1.3 4.2.1.99]		27.0084	104.756	55.288	51.7465	649.816	30.7973	3.87865		1.91594		24.0598	AcPro
H1geoB	H_contig_1683	3	1016	+	338	K00790	murA; UDP-N-acetylglucosamine 1-carboxyvinyltransferase [EC:2.5.1.7]		59.9698	62.2515	46.6186	1.16353	31.7636	59.3017	1.03805		0.019402	EET	0.52966
H1geoB	H_contig_1694	1989	2618	-	210				1.22181	4.06197	2.50113	14.9819	76.6864	54.5019	3.32456		12.262		62.7647	AcPro
H1geoB	H_contig_1721	3	191	+	63				8.14538	4.5133	8.33708	0	51.1242	41.1356	0.554093		ZERO		6.27647	AcPro
H1geoB	H_contig_1728	3	977	-	325	K07792	dcuB; anaerobic C4-dicarboxylate transporter DcuB		7.89475	3.49954	6.46445	605.036	9.91024	80.1043	0.443275		76.6378	OC	1.25529
H1geoB	H_contig_1728	1191	1511	-	107	K07792	dcuB; anaerobic C4-dicarboxylate transporter DcuB		23.9794	5.31473	9.8175	694.661	10.0337	76.262	0.221637		28.9691	OC	0.418431
H1geoB	H_contig_1740	957	1205	-	83				55.6437	17.1288	37.9689	9.47647	90.5453	56.4768	0.30783		0.170306	EET	1.62723
H1geoB	H_contig_176	706	1089	+	128				6.01358	6.66417	12.3102	0	58.713	49.1882	1.10819		ZERO		9.7634	AcPro
H1geoB	H_contig_177	623	2467	-	615	K01236	treZ, glgZ; maltooligosyltrehalose trehalohydrolase [EC:3.2.1.141]		5.00643	10.1714	10.2485	7.03416	59.354	62.5863	2.03167		1.40503		11.8556	AcPro
H1geoB	H_contig_177	2741	3181	-	147				5.23632	11.6056	7.14607	8.02599	109.552	57.7244	2.21637		1.53276		20.9216	AcPro
H1geoB	H_contig_177	3269	3436	-	56				18.3271	5.07746	0	35.1137	95.858	43.962	0.277047		1.91594		5.23039	AcPro
H1geoB	H_contig_179	350	1015	-	222	K11996	MOCS3, UBA4, moeB; adenylyltransferase and sulfurtransferase		16.1807	15.3696	9.46372	30.1156	82.2133	46.1571	0.949874		1.8612		5.08095	AcPro
H1geoB	H_contig_179	2798	3916	-	373	K03738	E1.2.7.5, aor; aldehyde:ferredoxin oxidoreductase [EC:1.2.7.5]		39.2092	32.7789	45.0605	50.6089	201.482	48.4757	0.836		1.29074		5.13863	AcPro
H1geoB	H_contig_179	4116	4448	-	111	K03738	E1.2.7.5, aor; aldehyde:ferredoxin oxidoreductase [EC:1.2.7.5]		57.7882	33.3008	70.9779	70.8601	309.509	70.0013	0.576257		1.2262		5.35592	AcPro
H1geoB	H_contig_179	6463	7707	+	415	K03286	TC.OOP; OmpA-OmpF porin, OOP family		153.948	198.009	218.954	8.52883	359.594	53.3372	1.28621		0.0554008	EET	2.33582
H1geoB	H_contig_179	17503	18630	-	376	K00616	E2.2.1.2, talA, talB; transaldolase [EC:2.2.1.2]		15.0126	25.7114	23.7474	17.781	88.5156	55.1747	1.71265		1.1844		5.89608	AcPro
H1geoB	H_contig_179	19254	20093	-	280	K06966	K06966		9.16355	14.2169	20.6343	8.42729	61.3491	57.8526	1.55146		0.919653		6.6949	AcPro
H1geoB	H_contig_1920	367	867	-	167	K01011	TST, MPST, sseA; thiosulfate/3-mercaptopyruvate sulfurtransferase [EC:2.8.1.1 2.8.1.2]		204.342	211.125	97.499	16.4845	379.299	56.4265	1.0332		0.0806714	EET	1.8562
H1geoB	H_contig_1956	591	1217	+	209	K04564	SOD2; superoxide dismutase, Fe-Mn family [EC:1.15.1.1]		66.2933	62.5815	62.8273	84.6762	672.932	79.9338	0.944011		1.2773		10.1508	AcPro
H1geoB	H_contig_199	82	957	+	292				3.51479	6.81632	5.39626	6.73414	66.1814	100.164	1.93933		1.91594		18.8294	AcPro
H1geoB	H_contig_2011	553	1398	-	282				14.5577	28.2321	13.0378	4.18376	79.9496	51.0729	1.93933		0.287392		5.49191	AcPro
H1geoB	H_contig_2011	1494	2666	-	391	K03620	hyaC; Ni/Fe-hydrogenase 1 B-type cytochrome subunit		43.9663	69.0847	84.6289	66.3838	222.41	53.1962	1.57131		1.50988		5.05865	AcPro
H1geoB	H_contig_2011	2663	4378	-	572	K06281	E1.12.99.6L; hydrogenase large subunit [EC:1.12.99.6]		45.7537	82.0206	171.712	107.256	388.526	86.3349	1.79265		2.34421		8.49169	AcPro
H1geoB	H_contig_2011	4561	5637	-	359	K06282	E1.12.99.6S; hydrogenase small subunit [EC:1.12.99.6]		49.3147	79.2028	125.823	117.215	272.14	56.2354	1.60607		2.37688		5.51844	AcPro
H1geoB	H_contig_2060	321	1127	-	269			cytT (4)	24.7995	239.943	316.313	2.92397	31.9289	48.7843	9.67532	SP+	0.117904		1.28748
H1geoB	H_contig_2085	985	1413	-	143	K03168	topA; DNA topoisomerase I [EC:5.99.1.2]		14.3541	45.7327	22.0379	19.2512	90.0931	67.5957	3.18604		1.34116		6.27647	AcPro
H1geoB	H_contig_2161	32	970	-	313				55.7425	63.5899	62.0886	10.0517	133.772	50.7558	1.14078		0.180324	EET	2.39983
H1geoB	H_contig_218	2	100	-	33	K09005	K09005; hypothetical protein		23.3254	17.2326	0	0	130.134	26.2855	0.738791		ZERO		5.57908	AcPro
H1geoB	H_contig_218	6244	7251	-	336				94.6901	50.7746	56.2753	10.5341	348.284	47.3695	0.536219		0.111248	EET	3.67815
H1geoB	H_contig_218	7296	8366	-	357	K02280	cpaC, rcpA; pilus assembly protein CpaC		110.681	46.9914	57.3788	9.91446	363.884	51.9945	0.424565		0.0895766	EET	3.28767
H1geoB	H_contig_2242	2073	2282	+	70	K18138	acrB, mexB, adeJ; multidrug efflux pump		7.33084	0	30.0135	0	61.3491	41.2542	ZERO		ZERO		8.36863	AcPro
H1geoB	H_contig_2265	3	518	+	172	K00029	E1.1.1.40, maeB; malate dehydrogenase (oxaloacetate-decarboxylating)(NADP+) [EC:1.1.1.40]		1.49174	13.225	3.0537	0	62.4191	51.8134	8.86549		ZERO		41.8431	AcPro
H1geoB	H_contig_2311	118	534	+	139	K13655	mqsA; HTH-type transcriptional regulator / antitoxin for MqsR toxin		7.38358	34.7751	18.8934	28.2931	61.7905	71.4377	4.70979		3.83189		8.36863	AcPro
H1geoB	H_contig_2311	555	1082	-	176				10.2049	14.54	17.9058	11.1725	67.1006	52.8147	1.42481		1.09483		6.57535	AcPro
H1geoB	H_contig_2311	1410	1805	+	132				19.4378	19.3867	7.95813	92.3597	138.268	52.7328	0.997368		4.75154		7.11333	AcPro
H1geoB	H_contig_2313	930	1259	+	110	K03671	trxA; thioredoxin 1		492.166	524.733	300.817	53.6282	780.807	96.7769	1.06617		0.108964	EET	1.58647
H1geoB	H_contig_2313	1275	1787	+	171	K02199	ccmG, dsbE; cytochrome c biogenesis protein CcmG, thiol:disulfide interchange protein DsbE		213.066	231.128	190.437	18.3988	401.819	87.3105	1.08477		0.0863524	EET	1.88589
H1geoB	H_contig_2313	4470	5528	+	353	K13979	yahK; uncharacterized zinc-type alcohol dehydrogenase-like protein [EC:1.-.-.-]	na (1)	13.0834	24.9702	32.7343	4.45636	69.9519	55.1191	1.90854		0.340612		5.34662	AcPro
H1geoB	H_contig_2358	223	930	+	236	K01069	E3.1.2.6, gloB; hydroxyacylglutathione hydrolase [EC:3.1.2.6]		161.993	124.097	122.407	11.6649	400.329	48.7564	0.766062		0.0720087	EET	2.47127
H1geoB	H_contig_2358	1306	2001	+	232				363.856	297.819	296.577	20.3417	467.39	48.5221	0.818508		0.055906	EET	1.28455
H1geoB	H_contig_246	634	930	-	99				31.1005	34.4652	37.1379	389.301	498.849	50.4454	1.10819		12.5175	OC	16.0399	AcPro
H1geoB	H_contig_246	32515	33630	-	372	K00259	ald; alanine dehydrogenase [EC:1.4.1.1]		68.2833	54.2688	88.9513	12.6862	49.0628	68.6285	0.79476		0.185789	EET	0.718518
H1geoB	H_contig_2477	560	709	+	50	K13819	K13819; NifU-like protein		66.7107	147.856	94.5425	7.86547	64.4165	39.4105	2.21637		0.117904	EET	0.965611
H1geoB	H_contig_2477	917	2065	+	383	K04487	iscS, NFS1; cysteine desulfurase [EC:2.8.1.7]		115.896	185.599	152.223	19.5097	162.583	52.6925	1.60143		0.168337	EET	1.40283
H1geoB	H_contig_2480	2	502	-	167	K08303	K08303; putative protease [EC:3.4.-.-]		12.2912	28.9446	9.43538	0	70.7168	44.8229	2.3549		ZERO		5.75343	AcPro
H1geoB	H_contig_2492	363	1085	+	241	K01591	pyrF; orotidine-5'-phosphate decarboxylase [EC:4.1.1.23]		63.8787	48.3728	37.0499	6.52736	53.4577	63.2885	0.757261		0.102184	EET	0.836863
H1geoB	H_contig_2509	3962	4480	-	173	K03408	cheW; purine-binding chemotaxis protein CheW		11.8649	13.1486	18.2163	9.09303	62.0583	38.0492	1.10819		0.766378		5.23039	AcPro
H1geoB	H_contig_2510	3	1091	+	363	K00174	korA; 2-oxoglutarate ferredoxin oxidoreductase subunit alpha [EC:1.2.7.3]		69.2694	104.179	153.375	26.0016	1011.5	51.1408	1.50397		0.375369		14.6024	AcPro
H1geoB	H_contig_2510	1093	1905	+	271	K00175	korB; 2-oxoglutarate ferredoxin oxidoreductase subunit beta [EC:1.2.7.3]		55.8605	135.349	193.814	29.0239	1109.26	50.4768	2.42298		0.519578		19.8578	AcPro
H1geoB	H_contig_2510	1925	2311	+	129	K00177	korG; 2-oxoglutarate ferredoxin oxidoreductase subunit gamma [EC:1.2.7.3]		91.4935	165.313	415.303	192.064	1922.51	89.5773	1.80683		2.09921		21.0125	AcPro
H1geoB	H_contig_2563	667	786	+	40	K02458	gspI; general secretion pathway protein I		0	14.2169	0	9.83184	53.6805	28.2181	∞		∞		∞	AcPro
H1geoB	H_contig_2585	3106	3315	-	70	K00177	korG; 2-oxoglutarate ferredoxin oxidoreductase subunit gamma [EC:1.2.7.3]		58.6467	117.797	210.095	224.728	1165.63	68.3102	2.00859		3.83189		19.8755	AcPro
H1geoB	H_contig_262	1	498	+	166	K01897	ACSL, fadD; long-chain acyl-CoA synthetase [EC:6.2.1.3]		4.63698	8.56439	28.4767	42.6441	51.7402	80.4274	1.84698		9.19653		11.1582	AcPro
H1geoB	H_contig_262	522	2882	+	787	K07516	fadN; 3-hydroxyacyl-CoA dehydrogenase [EC:1.1.1.35]		10.1067	13.7291	34.7043	52.4698	80.4866	75.8709	1.35842		5.19159	OC	7.96369	AcPro
H1geoB	H_contig_2682	3	956	+	318	K03286	TC.OOP; OmpA-OmpF porin, OOP family		58.9003	51.8604	74.3259	136.038	692.106	53.4927	0.880477		2.30963		11.7505	AcPro
H1geoB	H_contig_2702	2	469	-	156	K03074	secF; preprotein translocase subunit SecF		123.356	94.7793	87.5394	7.56296	116.996	47.355	0.768343		0.0613102	EET	0.948444
H1geoB	H_contig_2702	484	681	-	66	K03072	secD; preprotein translocase subunit SecD		229.367	129.245	198.953	17.8761	260.269	58.7428	0.563485		0.0779367	EET	1.13473
H1geoB	H_contig_275	6010	7188	-	393	K03406	mcp; methyl-accepting chemotaxis protein		20.892	14.4701	18.7107	13.0091	139.323	79.2852	0.692616		0.622682		6.66875	AcPro
H1geoB	H_contig_2771	3	428	+	142			extA (6)	12.6483	16.019	7.39769	8.3086	83.1669	46.655	1.2665		0.656895		6.57535	AcPro
H1geoB	H_contig_2771	644	1798	+	385	K01467	E3.5.2.6, ampC, penP; beta-lactamase [EC:3.5.2.6]		99.966	102.657	77.7623	3.06447	25.0974	76.1648	1.02692		0.0306551	EET	0.251059
H1geoB	H_contig_281	1	1458	+	486	K08677	K08677; kumamolisin		73.3839	33.9333	28.0991	2.42762	4.41814	64.4064	0.462409		0.0330811	EET	0.0602059	Suc
H1geoB	H_contig_281	1704	2582	+	293				7.88128	12.6157	14.3409	122.143	241.837	53.2369	1.60071		15.4979	OC	30.685	AcPro
H1geoB	H_contig_2827	792	2123	+	444	K00936	E2.7.3.-		19.648	32.6604	20.1104	8.85752	106.394	55.0885	1.66228		0.450811		5.41499	AcPro
H1geoB	H_contig_2827	2395	3090	+	232	K05799	pdhR; GntR family transcriptional regulator, transcriptional repressor for pyruvate dehydrogenase complex		35.3903	17.1583	63.3906	177.99	356.327	99.074	0.484832		5.02935	OC	10.0685	AcPro
H1geoB	H_contig_2827	3094	3855	+	254	K03417	prpB; methylisocitrate lyase [EC:4.1.3.30]		1.01016	5.5972	2.06786	21.6765	173.299	86.124	5.54093		21.4586		171.557	AcPro
H1geoB	H_contig_2882	3	1406	-	468	K03072	secD; preprotein translocase subunit SecD		163.926	131.233	142.532	5.04197	176.641	67.2878	0.800563		0.0307576	EET	1.07757
H1geoB	H_contig_2883	3	1298	+	432	K01681	ACO, acnA; aconitate hydratase [EC:4.2.1.3]		14.2544	16.4547	30.3956	10.0139	82.0118	47.9276	1.15436		0.702513		5.75343	AcPro
H1geoB	H_contig_2883	1282	2259	+	326	K00161	PDHA, pdhA; pyruvate dehydrogenase E1 component subunit alpha [EC:1.2.4.1]		13.3799	11.3386	16.1115	8.44453	108.678	47.7233	0.847437		0.631135		8.12249	AcPro
H1geoB	H_contig_2894	3	326	+	108				73.6478	71.0845	53.4963	0	39.7633	46.4709	0.965195		ZERO	EET	0.539911
H1geoB	H_contig_3031	3	821	-	273	K00600	glyA, SHMT; glycine hydroxymethyltransferase [EC:2.1.2.1]		205.828	212.472	207.786	0	192.699	55.4308	1.03228		ZERO	EET	0.936216
H1geoB	H_contig_3063	2	1051	-	350	K00343	nuoN; NADH-quinone oxidoreductase subunit N [EC:1.6.5.3]		7.33084	8.93633	10.5047	1.12364	52.1467	53.6706	1.219		0.153276		7.11333	AcPro
H1geoB	H_contig_3130	201	533	-	111				4.62305	23.0544	33.123	21.258	116.066	41.3208	4.98684		4.59827		25.1059	AcPro
H1geoB	H_contig_319	14354	14572	-	73	K00384	E1.8.1.9, trxB; thioredoxin reductase (NADPH) [EC:1.8.1.9]		17.5739	38.9504	93.5352	5.38731	88.2418	72.4005	2.21637		0.306551		5.02118	AcPro
H1geoB	H_contig_3202	279	1286	-	336			2180 (7)	77.1266	75.3157	46.8961	9.36366	92.6627	50.7065	0.976521		0.121406	EET	1.20144
H1geoB	H_contig_3202	1306	2142	-	279	K02195	ccmC; heme exporter protein C		103	108.028	120.484	1.40958	165.467	56.4308	1.04882		0.0136853	EET	1.60648
H1geoB	H_contig_3253	3	254	+	84	K01579	panD; aspartate 1-decarboxylase [EC:4.1.1.11]		15.2726	6.76995	0	23.4091	178.935	38.9627	0.443275		1.53276		11.7161	AcPro
H1geoB	H_contig_328	4117	4521	-	135	K01849	E5.4.99.2B, mcmA2; methylmalonyl-CoA mutase, C-terminal domain [EC:5.4.99.2]		15.2047	10.531	35.0158	2.91314	127.243	94.392	0.692616		0.191594		8.36863	AcPro
H1geoB	H_contig_328	4557	5087	-	177	K00798	E2.5.1.17, cobO, btuR; cob(I)alamin adenosyltransferase [EC:2.5.1.17]		7.24801	3.21286	5.93487	4.44377	78.8526	95.9689	0.443275		0.613102		10.8792	AcPro
H1geoB	H_contig_328	15457	16149	-	231				61.0904	65.2377	59.1175	100.447	306.745	83.4189	1.06789		1.64423		5.02118	AcPro
H1geoB	H_contig_328	16267	16563	-	99	K07713	hydG, zraR; two-component system, NtrC family, response regulator HydG		5.18342	11.4884	5.30542	0	54.2227	71.8182	2.21637		ZERO		10.4608	AcPro
H1geoB	H_contig_3335	2	997	-	332	K03043	rpoB; DNA-directed RNA polymerase subunit beta [EC:2.7.7.6]		159.976	107.911	117.071	10.661	181.091	53.2675	0.674548		0.0666416	EET	1.13199
H1geoB	H_contig_339	3	98	+	32	K02669	pilT; twitching motility protein PilT		112.254	71.0845	82.0682	0	67.1006	26.3354	0.633249		ZERO	EET	0.597759
H1geoB	H_contig_339	138	1361	+	408	K02653	pilC; type IV pilus assembly protein PilC		86.7842	94.0824	90.1141	0.963906	94.7302	49.9096	1.0841		0.0111069	EET	1.09156
H1geoB	H_contig_339	4983	5192	+	70	K02650	pilA; type IV pilus assembly protein PilA		2895.68	2152.84	1845.83	162.928	2177.89	44.0295	0.743467		0.0562657	EET	0.752117
H1geoB	H_contig_339	5220	5561	+	114				2730.1	2032.77	2114.77	213.886	1685.75	47.6344	0.744577		0.0783437	EET	0.617471
H1geoB	H_contig_339	5643	6452	+	270				235.673	186.399	83.6487	10.196	123.266	45.22	0.790923		0.0432633	EET	0.523039
H1geoB	H_contig_339	6449	7288	+	280				155.78	130.999	60.027	1.40455	134.201	52.4909	0.840918		0.00901621	EET	0.861476
H1geoB	H_contig_339	7285	8205	+	307	K01990	ABC-2.A; ABC-2 type transport system ATP-binding protein		89.4267	75.0208	41.0608	2.56204	52.4565	51.248	0.838907		0.0286496	EET	0.586586
H1geoB	H_contig_339	8232	10034	+	601				62.7574	40.6873	14.8569	2.61746	51.8048	53.8867	0.648327		0.0417076	EET	0.825477
H1geoB	H_contig_3464	547	1110	+	188	K03809	wrbA; Trp repressor binding protein		15.0126	36.2985	41.9072	41.8376	177.031	57.0725	2.41786		2.78683		11.7922	AcPro
H1geoB	H_contig_3490	2	1192	-	397	K01952	purL, PFAS; phosphoribosylformylglycinamidine synthase [EC:6.3.5.3]		72.3852	58.7297	47.6285	0.990614	56.7904	49.0362	0.811351		0.0136853	EET	0.784559
H1geoB	H_contig_358	2335	2508	+	58	K02968	RP-S20, rpsT; small subunit ribosomal protein S20		137.137	98.0476	81.5022	6.78058	425.742	32.1617	0.714959		0.0494437	EET	3.10449
H1geoB	H_contig_3587	2	1015	-	338	K03070	secA; preprotein translocase subunit SecA		72.8747	52.1567	35.7409	4.65413	130.231	53.319	0.715704		0.0638648	EET	1.78705
H1geoB	H_contig_365	509	1471	-	321	K01465	URA4, pyrC; dihydroorotase [EC:3.5.2.3]		71.1389	67.3199	112.901	9.80121	133.783	84.6833	0.946316		0.137776	EET	1.88059
H1geoB	H_contig_365	1642	2364	-	241	K00609	pyrB, PYR2; aspartate carbamoyltransferase catalytic subunit [EC:2.1.3.2]		66.008	50.7325	43.5881	0	98.0058	50.6748	0.768581		ZERO	EET	1.48476
H1geoB	H_contig_381	3834	5063	-	410	K02672	pilW; type IV pilus assembly protein PilW		88.8641	70.7377	67.8964	10.5512	65.464	46.4609	0.796021		0.118735	EET	0.736675
H1geoB	H_contig_381	5445	5933	-	163	K08084	fimT; type IV fimbrial biogenesis protein FimT		51.9455	43.6101	48.3346	7.23817	39.5194	44.4247	0.839535		0.139341	EET	0.760784
H1geoB	H_contig_381	5933	11056	-	1708	K02674	pilY1; type IV pilus assembly protein PilY1		69.5529	62.4278	63.6557	2.53279	69.1434	50.1079	0.897559		0.0364154	EET	0.994113
H1geoB	H_contig_381	11103	11882	-	260	K03981	dsbC; thiol:disulfide interchange protein DsbC [EC:5.3.4.1]	1041 (1)	58.2238	47.0251	24.2417	0	41.2927	49.799	0.807661		ZERO	EET	0.709206
H1geoB	H_contig_3898	1582	2070	-	163	K03531	ftsZ; cell division protein FtsZ		127.503	132.575	148.226	24.1272	204.183	49.5628	1.03978		0.189229	EET	1.6014
H1geoB	H_contig_3954	1425	3014	+	530	K09800	K09800; hypothetical protein		2.42056	6.97433	7.9281	8.16228	50.6419	64.5841	2.88128		3.37206		20.9216	AcPro
H1geoB	H_contig_3971	137	1051	-	305	K03385	nrfA; cytochrome c-552 [EC:1.7.2.2]	nrfA (2)	54.6809	80.174	84.3822	25.7884	334.403	48.3484	1.46622		0.471617		6.11554	AcPro
H1geoB	H_contig_3973	21	797	+	259	K00677	lpxA; UDP-N-acetylglucosamine acyltransferase [EC:2.3.1.129]		60.4299	37.3262	50.6985	6.07373	74.6138	49.4118	0.617678		0.100509	EET	1.23472
H1geoB	H_contig_399	1274	1501	+	76				1691.4	2083.9	5314.56	27570.6	1073.61	40.127	1.23206		16.3004	OC	0.634746
H1geoB	H_contig_4128	1314	2015	-	234	K01749	hemC, HMBS; hydroxymethylbilane synthase [EC:2.5.1.61]		166.667	147.029	168.345	15.1259	211.051	54.2821	0.882175		0.0907553	EET	1.26631
H1geoB	H_contig_436	293	1570	-	426	K03286	TC.OOP; OmpA-OmpF porin, OOP family		258.386	567.341	680.588	72.0079	1885.12	53.9293	2.19571		0.278683		7.29573	AcPro
H1geoB	H_contig_436	1614	2042	-	143	K03282	mscL; large conductance mechanosensitive channel		12.5598	27.8373	22.0379	0	112.616	52.0687	2.21637		ZERO		8.96639	AcPro
H1geoB	H_contig_4367	2	1003	-	334	K05601	hcp; hydroxylamine reductase [EC:1.7.99.1]		87.575	132.805	146.248	87.1325	678.238	51.8869	1.51647		0.994947		7.74465	AcPro
H1geoB	H_contig_444	467	979	+	171				12.0037	11.6396	6.14311	2.29985	81.6194	48.8142	0.969663		0.191594		6.79951	AcPro
H1geoB	H_contig_460	1345	2037	+	231				14.4395	7.3854	11.3688	1.70248	74.3625	54.0741	0.511471		0.117904		5.14992	AcPro
H1geoB	H_contig_460	3878	4234	+	119				71.1523	31.0621	30.8963	0	108.263	52.8941	0.436558		ZERO	EET	1.52157
H1geoB	H_contig_464	7167	7568	-	134				317.852	256.753	219.502	23.479	384.576	49.5387	0.807774		0.0738677	EET	1.20992
H1geoB	H_contig_464	21623	22531	+	303	K11997	TRIM2_3; tripartite motif-containing protein 2/3		56.7354	51.6125	53.737	9.08553	56.6922	49.6802	0.909705		0.160139	EET	0.999239
H1geoB	H_contig_464	22910	24229	+	440			omcS (6)	794.813	666.255	891.708	138.54	3750.31	49.3184	0.838254		0.174305	EET	4.71848
H1geoB	H_contig_464	29803	30348	+	182				67.6693	54.6804	60.6042	6.48253	88.4843	45.3047	0.808053		0.0957972	EET	1.3076
H1geoB	H_contig_464	31612	33411	+	600	K03769	ppiC; peptidyl-prolyl cis-trans isomerase C [EC:5.2.1.8]		171.481	128.426	128.683	11.1428	144.937	55.3234	0.748924		0.0649797	EET	0.84521
H1geoB	H_contig_464	33455	35431	+	659	K09228	KRAB; KRAB domain-containing zinc finger protein	extQ (24)	125.759	122.537	92.4543	11.9355	123.815	52.8021	0.974381		0.0949075	EET	0.984544
H1geoB	H_contig_464	35502	36731	+	410	K01158	DNASE2; deoxyribonuclease II [EC:3.1.22.1]	extR (16)	127.664	153.265	98.6419	17.2657	151.876	54.7497	1.20054		0.135243	EET	1.18966
H1geoB	H_contig_464	36737	37645	+	303	K11997	TRIM2_3; tripartite motif-containing protein 2/3		145.649	134.192	95.3399	14.2773	138.187	52.6815	0.921341		0.0980251	EET	0.948769
H1geoB	H_contig_464	37722	38540	+	273	K07126	K07126		103.384	93.7378	59.6422	18.7273	98.3159	52.257	0.906698		0.181144	EET	0.95098
H1geoB	H_contig_464	38626	38925	+	100				135.987	102.362	99.7949	19.6637	171.777	49.9203	0.75273		0.1446	EET	1.26319
H1geoB	H_contig_464	38980	39405	+	142	K07126	K07126		137.324	106.126	36.9885	11.0781	98.2882	52.2779	0.772814		0.0806714	EET	0.715738
H1geoB	H_contig_464	49983	50648	-	222				64.7228	23.0544	16.5615	0	72.5412	51.6177	0.356203		ZERO	EET	1.1208
H1geoB	H_contig_464	52410	52586	+	59				8.69761	14.4579	0	39.9939	54.5903	69.7721	1.66228		4.59827		6.27647	AcPro
H1geoB	H_contig_469	6010	7197	-	396	K01999	livK; branched-chain amino acid transport system substrate-binding protein		54.426	45.2356	58.3596	8.93804	509.693	53.0543	0.83114		0.164224	EET	9.36489	AcPro
H1geoB	H_contig_469	7342	8646	-	435				38.3395	23.5314	42.2604	0.904077	229.53	89.8928	0.613765		0.0235809		5.98679	AcPro
H1geoB	H_contig_470	3	902	+	300	K00371	narH; nitrate reductase beta subunit [EC:1.7.99.4]		8.55265	33.1728	24.511	9.17639	96.6248	82.5637	3.87865		1.07293		11.2976	AcPro
H1geoB	H_contig_470	1438	2103	+	222	K00374	narI; nitrate reductase gamma subunit [EC:1.7.99.4]		8.09034	11.5272	26.0252	12.4005	87.0494	47.1876	1.42481		1.53276		10.7597	AcPro
H1geoB	H_contig_4769	134	1327	+	398				59.3098	90.7309	81.8207	9.88125	126.783	52.5859	1.52978		0.166604	EET	2.13764
H1geoB	H_contig_477	2248	2973	+	242				23.3254	36.4235	75.9639	74.7545	155.274	59.5032	1.56154		3.20485		6.65686	AcPro
H1geoB	H_contig_4988	3	1073	+	357	K00031	IDH1, IDH2, icd; isocitrate dehydrogenase [EC:1.1.1.42]		17.9678	69.2924	97.1025	7.71125	872.119	54.2191	3.85649		0.429172		48.538	AcPro
H1geoB	H_contig_4999	3	1139	+	379				58.8982	71.272	67.9065	3.11298	87.815	60.4368	1.21009		0.0528536	EET	1.49096
H1geoB	H_contig_5066	1254	1829	-	192	K12600	SKI3, TTC37; superkiller protein 3		142.99	115.512	62.9189	10.2415	123.018	50.1593	0.807837		0.0716241	EET	0.860326
H1geoB	H_contig_5066	1839	2045	-	69	K03074	secF; preprotein translocase subunit SecF		122.712	70.0543	60.897	11.3992	62.2382	39.1475	0.570884		0.0928943	EET	0.50719
H1geoB	H_contig_5076	283	1881	+	533	K13924	cheBR; two-component system, chemotaxis family, CheB/CheR fusion protein [EC:2.1.1.80 3.1.1.61]		88.0939	170.709	135.99	11.0677	96.6852	51.7969	1.93781		0.125636	EET	1.09752
H1geoB	H_contig_5117	3	950	+	316	K00850	pfkA, PFK; 6-phosphofructokinase 1 [EC:2.7.1.11]		25.1708	55.7878	41.5535	12.4454	132.502	41.9063	2.21637		0.494437		5.26414	AcPro
H1geoB	H_contig_5140	459	893	+	145	K03711	fur; Fur family transcriptional regulator, ferric uptake regulator		10.6171	3.9219	14.4893	2.71223	140.68	40.7405	0.369395		0.255459		13.2503	AcPro
H1geoB	H_contig_52	2	160	-	53				58.0935	21.4595	79.281	0	162.054	70.1299	0.369395		ZERO	EET	2.78954
H1geoB	H_contig_523	2	541	+	180				69.8466	15.7966	8.75394	2.18485	35.787	88.1279	0.22616		0.0312807	EET	0.512365
H1geoB	H_contig_53	866	2218	+	451	K00012	UGDH, ugd; UDPglucose 6-dehydrogenase [EC:1.1.1.22]		75.0964	63.6766	40.7611	5.23202	92.8398	58.6556	0.84793		0.0696707	EET	1.23627
H1geoB	H_contig_53	2893	3456	+	188	K01710	E4.2.1.46, rfbB, rffG; dTDP-glucose 4,6-dehydratase [EC:4.2.1.46]		57.321	51.4228	122.928	4.18376	165.61	85.4443	0.897103		0.0729884	EET	2.88917
H1geoB	H_contig_53	3463	3591	+	43	K05589	ftsB; cell division protein FtsB		65.6366	33.0625	0	0	49.9353	70.9931	0.503721		ZERO	EET	0.760784
H1geoB	H_contig_530	2	1144	-	381	K15441	TAD2, ADAT2; tRNA-specific adenosine deaminase 2 [EC:3.5.4.-]		16.8359	24.6277	33.0858	20.6443	95.8076	55.5211	1.46281		1.2262		5.69067	AcPro
H1geoB	H_contig_533	2621	2941	-	107				2.39794	13.2868	4.90875	3.67546	60.2024	64.5259	5.54093		1.53276		25.1059	AcPro
H1geoB	H_contig_5348	3	362	+	120	K03856	AROA2, aroA; 3-deoxy-7-phosphoheptulonate synthase [EC:2.5.1.54]		74.8357	272.49	240.733	6.55456	35.787	45.4842	3.64118		0.087586	EET	0.478207
H1geoB	H_contig_5541	1	633	+	211	K01885	EARS, gltX; glutamyl-tRNA synthetase [EC:6.1.1.17]		85.1212	71.4214	92.103	5.59157	96.6757	46.8475	0.839055		0.0656895	EET	1.13574
H1geoB	H_contig_561	1	207	+	69				0	20.6042	15.2242	5.69962	77.7978	85.7554	∞		∞		∞	AcPro
H1geoB	H_contig_566	2601	2783	+	61				71.5058	69.9192	25.8313	6.44711	17.6001	43.9211	0.977811		0.0901621	EET	0.246136
H1geoB	H_contig_567	3236	3430	+	65	K05343	treS; maltose alpha-D-glucosyltransferase/ alpha-amylase [EC:5.4.99.16 3.2.1.1]		3.94738	4.37443	8.08056	0	66.0683	58.3417	1.10819		ZERO		16.7373	AcPro
H1geoB	H_contig_583	3	566	+	188	K01362	E3.4.21.-		58.6857	87.7213	86.6081	4.18376	251.27	41.7896	1.49476		0.071291	EET	4.28162
H1geoB	H_contig_6069	1	705	+	235	K00818	E2.6.1.11, argD; acetylornithine aminotransferase [EC:2.6.1.11]		56.775	50.8178	60.3463	5.02052	137.056	58.6532	0.895074		0.0884282	EET	2.41403
H1geoB	H_contig_6069	839	1270	+	144	K00611	OTC, argF, argI; ornithine carbamoyltransferase [EC:2.1.3.3]		62.3631	90.8302	65.6545	2.73107	111.834	52.4318	1.45647		0.043793	EET	1.79328
H1geoB	H_contig_629	2455	2898	-	148	K00928	lysC; aspartate kinase [EC:2.7.2.4]		50.2757	34.5816	60.3312	5.31451	166.845	62.818	0.68784		0.105707	EET	3.31859
H1geoB	H_contig_6606	3	320	+	106	K01067	E3.1.2.1, ACH1; acetyl-CoA hydrolase [EC:3.1.2.1]		2.42056	0	0	289.39	557.061	66.2044	ZERO		119.555	OC	230.137	AcPro
H1geoB	H_contig_6606	429	551	-	41	K03111	ssb; single-strand DNA-binding protein		50.0643	34.6754	25.6213	0	104.742	56.6514	0.692616		ZERO	EET	2.09216
H1geoB	H_contig_673	1507	2331	+	275			3677 (2)	13.9952	19.6452	36.2891	7.15043	128.833	70.1656	1.4037		0.510919		9.20549	AcPro
H1geoB	H_contig_673	2331	4295	+	655	K00370	narG; nitrate reductase alpha subunit [EC:1.7.99.4]		15.2773	13.4572	32.0755	6.00418	95.0677	53.817	0.880866		0.393014		6.22283	AcPro
H1geoB	H_contig_673	4448	5449	+	334	K00370	narG; nitrate reductase alpha subunit [EC:1.7.99.4]		16.1322	20.4315	23.5885	10.5972	96.432	47.3475	1.2665		0.656895		5.97759	AcPro
H1geoB	H_contig_71	1791	2807	+	339	K01993	ABC-2.TX; HlyD family secretion protein		12.8668	29.3564	21.6912	49.8843	183.685	82.6599	2.28156		3.87697		14.2759	AcPro
H1geoB	H_contig_727	29934	30095	+	54				19.0059	5.26552	9.7266	21.8485	119.29	95.837	0.277047		1.14957		6.27647	AcPro
H1geoB	H_contig_728	324	683	+	120				76.9739	92.4098	35.0158	13.1091	232.615	73.6568	1.20054		0.170306	EET	3.022
H1geoB	H_contig_750	1832	2113	-	94	K03686	dnaJ; molecular chaperone DnaJ		5.45914	3.02487	0	4.18376	57.1069	54.2105	0.554093		0.766378		10.4608	AcPro
H1geoB	H_contig_754	2062	2337	-	92	K02437	gcvH, GCSH; glycine cleavage system H protein		136.656	52.5407	108.473	12.8241	58.3483	74.7455	0.384473		0.0938422	EET	0.426971
H1geoB	H_contig_755	3	962	+	320	K01961	accC; acetyl-CoA carboxylase, biotin carboxylase subunit [EC:6.4.1.2 6.3.4.14]		93.8119	42.6507	34.4686	4.91592	154.331	45.1878	0.454641		0.0524019	EET	1.64511
H1geoB	H_contig_776	1	282	-	94				223.825	181.492	61.4638	4.18376	205.585	43.8126	0.810868		0.0186921	EET	0.918508
H1geoB	H_contig_776	6644	8017	-	458	K01912	paaK; phenylacetate-CoA ligase [EC:6.2.1.30]		8.40326	11.1749	12.6148	6.86941	58.6031	51.7533	1.32982		0.81747		6.97386	AcPro
H1geoB	H_contig_776	11104	12003	-	300	K12987	migA; alpha-1,6-rhamnosyltransferase [EC:2.4.1.-]		16.25	16.1125	12.2555	17.0419	93.0461	54.3687	0.991535		1.04873		5.7259	AcPro
H1geoB	H_contig_776	19472	20629	-	386	K00754	E2.4.1.-		5.31771	13.9959	6.80358	4.07538	55.6274	46.5099	2.63194		0.766378		10.4608	AcPro
H1geoB	H_contig_776	20626	21768	-	381	K00754	E2.4.1.-		9.42812	20.8962	11.0286	9.28993	61.9932	46.1988	2.21637		0.985343		6.57535	AcPro
H1geoB	H_contig_776	38768	39586	-	273	K02406	fliC; flagellin		0	0	3.84788	51.8603	153.373	50.5906	∞		∞	OC	∞	AcPro
H1geoB	H_contig_784	768	2651	-	628	K04759	feoB; ferrous iron transport protein B		350.141	19.0162	5.85454	3.75739	5.12871	52.0616	0.0543102	SP	0.0107311	EET	0.0146475	Suc
H1geoB	H_contig_84	23934	25217	-	428				50.3567	34.5457	12.2719	4.59432	50.1686	53.5138	0.68602		0.0912355	EET	0.996265
H1geoB	H_contig_84	25305	27083	-	593	K01652	E2.2.1.6L, ilvB, ilvG, ilvI; acetolactate synthase I/II/III large subunit [EC:2.2.1.6]		84.3727	44.1131	40.7435	3.31597	56.1246	53.171	0.522837		0.0393014	EET	0.665199
H1geoB	H_contig_84	27115	28176	-	354	K01710	E4.2.1.46, rfbB, rffG; dTDP-glucose 4,6-dehydratase [EC:4.2.1.46]		75.3793	50.6025	25.2232	4.44377	39.4263	54.7992	0.671305		0.0589521	EET	0.523039
H1geoB	H_contig_84	28177	29508	-	444	K12452	rfbH; CDP-6-deoxy-D-xylo-4-hexulose-3-dehydrase		98.8178	62.1189	43.7697	2.65725	58.0329	52.6495	0.62862		0.0268905	EET	0.587272
H1geoB	H_contig_84	29559	30653	-	365	K01709	rfbG; CDP-glucose 4,6-dehydratase [EC:4.2.1.45]		104.038	63.8787	44.6091	6.46477	76.4763	46.2846	0.613995		0.0621387	EET	0.735082
H1geoB	H_contig_84	30670	31443	-	258	K00978	rfbF; glucose-1-phosphate cytidylyltransferase [EC:2.7.7.33]		140.224	73.8397	42.7518	3.04863	112.354	52.4237	0.526585		0.0217412	EET	0.801252
H1geoB	H_contig_84	31528	32703	-	392	K00903	E2.7.10.-; protein-tyrosine kinase [EC:2.7.10.-]		78.5447	51.5	30.8174	0	41.082	52.5202	0.655677		ZERO	EET	0.523039
H1geoB	H_contig_84	33463	34338	-	292	K00973	E2.7.7.24, rfbA, rffH; glucose-1-phosphate thymidylyltransferase [EC:2.7.7.24]		58.8727	34.0816	25.1826	1.34683	36.7674	52.6256	0.578903		0.022877	EET	0.624524
H1geoB	H_contig_84	34335	35426	-	364	K01710	E4.2.1.46, rfbB, rffG; dTDP-glucose 4,6-dehydratase [EC:4.2.1.46]		65.5547	30.4648	25.9732	4.32169	44.2421	56.3275	0.464723		0.065925	EET	0.674889
H1geoB	H_contig_84	35660	38494	-	945	K01991	ABC-2.OM, wza; polysaccharide export outer membrane protein		80.3678	50.549	43.9086	2.91314	55.6686	50.9342	0.628971		0.0362476	EET	0.692674
H1geoB	H_contig_84	40736	40885	-	50	K06041	E5.3.1.13; arabinose-5-phosphate isomerase [EC:5.3.1.13]		25.658	17.0603	10.5047	7.86547	150.305	83.8067	0.664912		0.306551		5.85804	AcPro
H1geoB	H_contig_84	41221	42042	-	274	K01627	kdsA; 2-dehydro-3-deoxyphosphooctonate aldolase (KDO 8-P synthase) [EC:2.5.1.55]		57.1217	45.6601	42.1723	7.17653	97.957	74.1063	0.799348		0.125636	EET	1.71488
H1geoB	H_contig_916	8917	9837	+	307	K00599	E2.1.1.-		11.7007	14.8189	15.3978	2.56204	94.4216	83.8343	1.2665		0.218965		8.06975	AcPro
H1geoB	H_contig_916	9908	10447	+	180				12.829	7.89828	14.5899	0	65.6094	85.6162	0.615659		ZERO		5.11416	AcPro
H1geoB	H_contig_923	1679	1918	-	80				51.3159	67.5303	118.178	216.301	348.923	40.123	1.31597		4.21508		6.79951	AcPro
H1geoB	H_contig_930	820	1482	+	221				9.28795	3.85979	2.37663	14.2362	77.7274	56.107	0.41557		1.53276		8.36863	AcPro
H1geoB	H_contig_955	4170	4499	-	110	K01547	kdpB; K+-transporting ATPase ATPase B chain [EC:3.6.3.12]		51.3159	113.735	186.22	7.15043	68.3206	57.6821	2.21637		0.139341	EET	1.33137
H1geoB	H_contig_973	12428	13279	+	284	K02044	phnD; phosphonate transport system substrate-binding protein		4.51724	16.019	9.24712	9.69337	56.7047	76.4078	3.5462		2.14586		12.5529	AcPro
H1geoB	H_contig_973	15609	16421	-	271	K01078	E3.1.3.2; acid phosphatase [EC:3.1.3.2]		47.3394	38.821	44.5773	10.1584	245.623	74.7999	0.820058		0.214586		5.18855	AcPro
H1geoB	H_contig_973	16460	17305	-	282				40.9435	30.2487	48.426	18.1296	270.306	88.8129	0.738791		0.442796		6.60192	AcPro
H1geoB	H_contig_973	17369	17914	-	182				59.2107	54.6804	40.4028	19.4476	348.038	90.1722	0.923489		0.328448		5.87796	AcPro
H1geoB	H_contig_981	3	1502	-	500	K03406	mcp; methyl-accepting chemotaxis protein		116.487	103.499	140.763	7.86547	139.569	93.461	0.888502		0.0675223	EET	1.19815
H1geoB	H_contig_981	1508	1867	-	120			3984 (1)	160.362	139.799	148.817	13.1091	250.509	83.2219	0.871773		0.081747	EET	1.56214
H1geoB	H_contig_981	1942	3255	-	438			na (1)	70.8816	53.8814	74.3485	4.48943	90.693	86.8222	0.760161		0.063337	EET	1.2795
H1geoB	H_contig_981	3612	5327	+	572			2287 (7)	56.5193	39.7675	51.4217	6.18787	76.9545	54.3308	0.70361		0.109483	EET	1.36156
H1geoB	H_contig_981	5898	6110	+	71				10.8414	12.0143	29.5908	5.53907	60.485	40.5074	1.10819		0.510919		5.57908	AcPro
H1geoC	H_contig_1012	2	1099	-	366	K01524	ppx-gppA; exopolyphosphatase / guanosine-5'-triphosphate,3'-diphosphate pyrophosphatase [EC:3.6.1.11 3.6.1.40]		12.8775	14.3203	9.7569	17.7029	68.4086	40.5831	1.11204		1.37471		5.31224	AcPro
H1geoC	H_contig_1057	5999	6172	+	58				19.1204	90.3661	65.9673	34.3728	102.24	40.6978	4.72616		1.7977		5.34719	AcPro
H1geoC	H_contig_1090	4225	4998	+	258				3.22379	9.48027	10.8752	27.0453	68.9528	33.7145	2.94072		8.38929		21.3888	AcPro
H1geoC	H_contig_1093	2318	2629	-	104	K02568	napB; cytochrome c-type protein NapB	napB (2)	10.6633	6.71953	7.35789	9.58473	57.0187	37.3387	0.630155		0.898852		5.34719	AcPro
H1geoC	H_contig_1093	3457	4113	-	219	K02573	napG; ferredoxin-type protein NapG		11.3937	14.3595	24.4591	15.9308	78.2235	38.1298	1.26031		1.39821		6.86553	AcPro
H1geoC	H_contig_111	3	302	+	100	K03408	cheW; purine-binding chemotaxis protein CheW		110.898	66.389	30.6088	34.8884	19.7665	59.5533	0.598647		0.314598		0.17824	Suc
H1geoC	H_contig_1150	4508	5158	-	217				2.55526	1.61021	2.35091	101.059	57.6902	40.0368	0.630155		39.5495	OC	22.577	AcPro
H1geoC	H_contig_1150	9316	9429	-	38				7.29594	0	0	0	52.017	26.4747	ZERO		ZERO		7.12959	AcPro
H1geoC	H_contig_1150	11282	11824	-	181	K00343	nuoN; NADH-quinone oxidoreductase subunit N [EC:1.6.5.3]		10.7222	46.3314	97.2379	13.7681	160.17	41.603	4.32106		1.28407		14.9382	AcPro
H1geoC	H_contig_1173	3	2987	-	995	K03406	mcp; methyl-accepting chemotaxis protein		65.7588	55.4851	77.932	2.50455	37.745	41.8433	0.843767		0.0380869	EET	0.573992
H1geoC	H_contig_121	1659	2681	+	341	K10255	FAD6, desA; omega-6 fatty acid desaturase (delta-12 desaturase) [EC:1.14.19.-]		3.25215	7.17275	5.98413	51.156	23.1865	41.4492	2.20554		15.7299	OC	7.12959
H1geoC	H_contig_121	2741	3022	-	94				0	3.71719	8.14064	79.5329	14.0188	38.5754	∞		∞	OC	∞
H1geoC	H_contig_121	18773	19444	+	224				2.47541	7.79946	4.55488	169.102	79.4189	41.7752	3.15077		68.3128	OC	32.0831	AcPro
H1geoC	H_contig_1408	2815	3255	-	147				5.65808	2.37698	6.94077	74.5914	71.7151	43.4053	0.420103		13.1832	OC	12.6748	AcPro
H1geoC	H_contig_1408	7100	7276	+	59				4.69908	17.7669	12.9698	16.8951	100.508	36.8102	3.78093		3.59541		21.3888	AcPro
H1geoC	H_contig_1475	3	1472	+	490	K06907	K06907		0	0	0.520558	38.6519	86.0581	44.2089	∞		∞		∞	AcPro
H1geoC	H_contig_1475	1512	1928	+	139				0	0	0	17.9283	85.3229	39.1841	∞		∞		∞	AcPro
H1geoC	H_contig_1475	2146	2583	+	146				0	0	5.24123	47.7923	67.6934	40.5099	∞		∞		∞	AcPro
H1geoC	H_contig_1475	2752	2907	+	52				0	0	0	28.7542	88.6957	33.6015	∞		∞		∞	AcPro
H1geoC	H_contig_1475	2907	3614	+	236				1.17477	0	0	21.1189	53.0456	39.7435	ZERO		17.977		45.154	AcPro
H1geoC	H_contig_1495	2703	3638	-	312	K00282	gcvPA; glycine dehydrogenase subunit 1 [EC:1.4.4.2]		9.77469	11.1992	11.4456	15.9745	63.3541	36.0807	1.14574		1.63428		6.48144	AcPro
H1geoC	H_contig_1536	1396	2622	-	409	K00362	nirB; nitrite reductase (NAD(P)H) large subunit [EC:1.7.1.4]		8.81221	13.6691	11.2257	25.5905	53.1617	46.4156	1.55115		2.90398		6.03273	AcPro
H1geoC	H_contig_157	39	2840	+	934	K01681	ACO, acnA; aconitate hydratase [EC:4.2.1.3]		10.3893	11.5973	14.4742	4.269	57.1408	41.6622	1.11627		0.410904		5.49997	AcPro
H1geoC	H_contig_1584	3	386	+	128	K02114	ATPF1E, atpC; F-type H+-transporting ATPase subunit epsilon [EC:3.6.3.14]		73.6434	51.8664	57.7901	3.8938	77.2128	43.1139	0.704291		0.0528736	EET	1.04847
H1geoC	H_contig_1635	3	392	+	130	K07792	dcuB; anaerobic C4-dicarboxylate transporter DcuB		4.26532	2.68781	0	107.349	0	39.5988	0.630155		25.1679	OC	ZERO
H1geoC	H_contig_1635	459	1139	+	227	K15371	GDH2; glutamate dehydrogenase [EC:1.4.1.2]		4.88539	3.07855	1.12367	98.8029	2.90257	39.2122	0.630155		20.2242	OC	0.594132
H1geoC	H_contig_1677	2062	2805	+	248	K06932	K06932		7.82549	15.4983	19.5419	12.0582	63.7628	36.9285	1.98049		1.54089		8.1481	AcPro
H1geoC	H_contig_1677	3016	3732	+	239	K00947	E2.7.4.-		16.2403	17.5439	8.53802	8.34152	93.7322	38.5753	1.08027		0.51363		5.77157	AcPro
H1geoC	H_contig_1776	7232	7846	+	205				1.35242	0	1.24426	80.2312	48.2109	39.5479	ZERO		59.3242	OC	35.6479
H1geoC	H_contig_1806	1570	2007	+	146				1.89894	0	0	430.131	31.5903	41.1041	ZERO		226.511	OC	16.6357
H1geoC	H_contig_1865	21	980	-	320	K00850	pfkA, PFK; 6-phosphofructokinase 1 [EC:2.7.1.11]		8.66393	17.4708	11.1595	4.67256	53.5342	38.2343	2.0165		0.539311		6.17897	AcPro
H1geoC	H_contig_1972	1985	2371	-	129	K15987	hppA; K(+)-stimulated pyrophosphate-energized sodium pump [EC:3.6.1.1]		58.0282	29.7951	53.3875	3.86361	51.0762	40.0357	0.51346		0.0665816	EET	0.880196
H1geoC	H_contig_1993	824	2170	+	449	K00936	E2.7.3.-		9.26211	17.1206	17.0428	22.2007	74.8397	42.7304	1.84845		2.39694		8.0802	AcPro
H1geoC	H_contig_1997	870	1487	-	206				51.1424	44.101	55.7199	9.67778	214.297	41.6254	0.862317		0.189232	EET	4.19019
H1geoC	H_contig_1997	1608	4664	-	1019	K13735	yeeJ; adhesin/invasin	omcA (7)	308.807	384.734	631.551	173.146	1690.85	41.8154	1.24587		0.560694		5.47544	AcPro
H1geoC	H_contig_1997	6979	7416	-	146			extCF (5)	153.814	134.022	213.144	116.067	956.734	39.6683	0.871325		0.754592		6.22005	AcPro
H1geoC	H_contig_1997	7406	8674	-	423				106.179	94.1687	147.135	110.757	548.29	41.3109	0.886885		1.04311		5.16382	AcPro
H1geoC	H_contig_2000	29933	30043	-	37	K06602	flaF; flagellar protein FlaF		44.9588	47.2183	6.89387	431.054	231.499	26.9452	1.05026		9.58775	OC	5.14915	AcPro
H1geoC	H_contig_2032	2329	2742	+	138				0	2.532	1.84836	281.708	57.2941	33.7701	∞		∞	OC	∞	AcPro
H1geoC	H_contig_205	263	2689	+	809	K00936	E2.7.3.-		13.0227	8.2063	14.5036	27.7234	80.6296	45.1732	0.630155		2.12886		6.19148	AcPro
H1geoC	H_contig_2056	3	110	-	36				0	29.118	49.5976	27.6892	54.9069	24.6337	∞		∞		∞	AcPro
H1geoC	H_contig_2113	4093	4770	+	226				26.9885	26.2835	25.9588	94.8294	169.094	42.186	0.973876		3.51369		6.26539	AcPro
H1geoC	H_contig_2247	8959	9198	-	80	K01962	accA; acetyl-CoA carboxylase carboxyl transferase subunit alpha [EC:6.4.1.2]		79.7082	78.6185	41.4494	0	65.8883	67.4326	0.986329		ZERO	EET	0.826619
H1geoC	H_contig_225	2896	3315	+	140				0	2.49583	0	291.923	23.5315	37.7664	∞		∞	OC	∞
H1geoC	H_contig_2332	226	639	+	138			2593 (3)	10.0451	10.128	7.39343	10.8349	109.814	34.0083	1.00825		1.07862		10.932	AcPro
H1geoC	H_contig_2460	1169	2260	+	364	K01999	livK; branched-chain amino acid transport system substrate-binding protein		11.425	9.59933	9.81051	1.36925	59.7339	42.6394	0.840207		0.119847		5.22836	AcPro
H1geoC	H_contig_2469	1	81	+	27	K00123	E1.2.1.2A; formate dehydrogenase, alpha subunit [EC:1.2.1.2]		123.22	12.9413	28.3415	0	0	19.7906	0.105026	SP	ZERO	EET	ZERO	Suc
H1geoC	H_contig_2469	130	2529	+	800	K00123	E1.2.1.2A; formate dehydrogenase, alpha subunit [EC:1.2.1.2]		187.487	85.6068	112.232	0	20.5901	51.134	0.4566		ZERO	EET	0.109821	Suc
H1geoC	H_contig_247	24623	25249	-	209				10.6123	6.68738	9.76357	81.0804	198.611	41.509	0.630155		7.64024	OC	18.7152	AcPro
H1geoC	H_contig_247	25540	27471	+	644	K00100	E1.1.1.-		8.61012	7.05342	7.52546	3.09569	51.1555	39.6931	0.819201		0.359541		5.94132	AcPro
H1geoC	H_contig_2491	2559	3170	+	204				19.0267	10.2769	16.2547	190.567	96.8945	40.4133	0.540133		10.0158	OC	5.09256	AcPro
H1geoC	H_contig_2525	2801	3361	+	187				10.3782	5.6056	5.45611	5.33054	73.9922	44.5286	0.540133		0.51363		7.12959	AcPro
H1geoC	H_contig_2544	900	1241	-	114				0	3.06505	4.47497	96.1836	40.4577	41.8298	∞		∞	OC	∞
H1geoC	H_contig_261	2	430	-	143	K00248	ACADS, bcd; butyryl-CoA dehydrogenase [EC:1.3.8.1]		7.75513	7.3304	1.78373	27.8828	50.6833	39.0194	0.945232		3.59541		6.53545	AcPro
H1geoC	H_contig_2620	2189	2521	+	111				4.99542	6.29578	6.89387	22.4507	53.4229	38.6834	1.26031		4.49426		10.6944	AcPro
H1geoC	H_contig_2666	2	1222	-	407	K10852	E2.3.1.164; isopenicillin-N N-acyltransferase [EC:2.3.1.164]		9.53671	11.1607	20.0549	28.1654	97.1326	39.4195	1.17029		2.95337		10.1851	AcPro
H1geoC	H_contig_2666	1296	2816	-	507	K03641	tolB; TolB protein		12.0304	13.7837	19.1179	15.7288	84.4721	46.3369	1.14574		1.30742		7.02156	AcPro
H1geoC	H_contig_2666	2910	3512	-	201				6.89666	5.21516	16.4973	9.91852	65.5605	39.8264	0.756186		1.43816		9.50611	AcPro
H1geoC	H_contig_273	3	74	-	24				103.967	131.031	74.3964	0	247.081	52.7238	1.26031		ZERO	EET	2.37653
H1geoC	H_contig_2749	3	164	+	54	K00338	nuoI; NADH-quinone oxidoreductase subunit I [EC:1.6.5.3]		0	19.412	0	0	73.2092	67.3451	∞		∞		∞	AcPro
H1geoC	H_contig_278	6165	6281	+	39				0	17.9187	6.54034	25.5593	67.5777	30.9086	∞		∞		∞	AcPro
H1geoC	H_contig_278	7837	8817	+	327				17.8048	17.0968	28.0815	27.4352	104.776	44.7837	0.960236		1.54089		5.88474	AcPro
H1geoC	H_contig_2823	418	1536	+	373				69.1256	159.251	181.218	8.01725	141.315	41.0415	2.30379		0.115981	EET	2.04433
H1geoC	H_contig_2877	3	422	+	140	K11264	mmcD; methylmalonyl-CoA decarboxylase [EC:4.1.1.41]		15.8426	59.8998	18.2195	39.1605	89.4198	49.802	3.78093		2.47184		5.64426	AcPro
H1geoC	H_contig_2961	681	2042	-	454	K03385	nrfA; cytochrome c-552 [EC:1.7.2.2]	nrfA (4)	22.5949	13.8535	22.4734	54.8905	142.226	41.8444	0.613124		2.42933		6.29459	AcPro
H1geoC	H_contig_2972	368	628	+	87				9.5602	20.0814	14.6594	5.7288	53.0135	36.7518	2.10052		0.599235		5.54523	AcPro
H1geoC	H_contig_3019	2935	3081	-	49				11.3162	21.3928	41.6446	81.3724	40.3397	26.1444	1.89046		7.19082	OC	3.56479
H1geoC	H_contig_3088	12	1436	-	475	K15022	fdhB; formate dehydrogenase beta subunit [EC:1.2.1.43]		4.08573	9.56295	15.0359	0	55.4848	41.8482	2.34058		ZERO		13.5802	AcPro
H1geoC	H_contig_3238	3	413	+	137				14.1658	15.3029	27.9277	120.054	110.615	35.3965	1.08027		8.47489	OC	7.80859	AcPro
H1geoC	H_contig_3421	3	77	-	25				11.0898	13.9766	10.2029	19.9362	79.0659	21.7033	1.26031		1.7977		7.12959	AcPro
H1geoC	H_contig_3589	166	927	-	254				174.643	165.078	159.672	9.81114	225.68	47.2572	0.945232		0.0561783	EET	1.29224
H1geoC	H_contig_3589	1144	1230	-	29				133.843	108.439	43.9782	0	181.761	44.4686	0.810199		ZERO	EET	1.35802
H1geoC	H_contig_3589	2135	2341	-	69	K01726	E4.2.1.-		144.65	91.1519	29.5737	14.4465	143.235	76.9115	0.630155		0.0998724	EET	0.99022
H1geoC	H_contig_3684	1643	2218	-	192				10.1079	12.7391	18.5991	7.78759	58.3386	40.643	1.26031		0.770445		5.77157	AcPro
H1geoC	H_contig_3684	2228	2377	-	50	K02666	pilQ; type IV pilus assembly protein PilQ		0	27.9532	35.7103	9.96812	92.2436	33.676	∞		∞		∞	AcPro
H1geoC	H_contig_373	4891	5049	-	53				0	0	0	225.693	136.749	33.9075	∞		∞	OC	∞	AcPro
H1geoC	H_contig_373	10932	11459	+	176	K00680	E2.3.1.-		0	1.98532	0	67.9644	48.6675	42.8734	∞		∞	OC	∞
H1geoC	H_contig_373	11422	12531	+	370	K00837	E2.6.1.-		0.749313	0.944367	0.689387	84.8637	39.1768	42.5434	1.26031		113.255	OC	52.2836
H1geoC	H_contig_3784	1468	1887	+	140	K00123	E1.2.1.2A; formate dehydrogenase, alpha subunit [EC:1.2.1.2]		73.2721	32.4457	30.9732	3.56004	4.7063	34.712	0.442812		0.0485866	EET	0.0642305	Suc
H1geoC	H_contig_3814	1922	2077	+	52	K02968	RP-S20, rpsT; small subunit ribosomal protein S20		277.246	181.427	58.8631	47.9236	253.416	89.5958	0.654392		0.172856	EET	0.914049
H1geoC	H_contig_3890	1	2046	+	682	K15371	GDH2; glutamate dehydrogenase [EC:1.4.1.2]		6.09778	5.1234	4.11409	130.813	1.93221	43.855	0.840207		21.4526	OC	0.31687
H1geoC	H_contig_394	4885	5091	+	69	K02650	pilA; type IV pilus assembly protein PilA		646.907	577.295	532.327	79.456	868.961	36.7693	0.892393		0.122824	EET	1.34326
H1geoC	H_contig_394	5146	5520	+	125				860.571	791.077	1085.59	87.7194	932.978	35.6212	0.919247		0.101932	EET	1.08414
H1geoC	H_contig_3943	2156	2383	-	76	K01749	hemC, HMBS; hydroxymethylbilane synthase [EC:2.5.1.61]		109.439	193.098	40.2747	6.55797	95.3646	74.6096	1.76443		0.0599235	EET	0.871394
H1geoC	H_contig_3970	2	751	-	250	K00058	serA, PHGDH; D-3-phosphoglycerate dehydrogenase [EC:1.1.1.95]		90.9366	103.427	80.6032	1.99362	115.963	44.9803	1.13735		0.0219232	EET	1.27521
H1geoC	H_contig_4065	599	733	-	45				0	15.5296	5.6683	55.3784	0	72.9221	∞		∞	OC	∞
H1geoC	H_contig_4069	584	934	+	117				0	14.9323	2.18011	136.316	39.4203	40.2985	∞		∞	OC	∞
H1geoC	H_contig_4113	219	794	+	192	K12600	SKI3, TTC37; superkiller protein 3		50.5396	36.3975	43.8407	5.19173	41.1802	39.3215	0.720177		0.102726	EET	0.81481
H1geoC	H_contig_4156	516	941	-	142			extA (6)	11.7146	22.1461	25.1481	0	69.6003	35.0688	1.89046		ZERO		5.94132	AcPro
H1geoC	H_contig_424	4584	4676	-	31				8.94341	22.5429	16.4563	16.0776	63.7628	11.4675	2.52062		1.7977		7.12959	AcPro
H1geoC	H_contig_4256	372	1160	+	263	K00335	nuoF; NADH-quinone oxidoreductase subunit F [EC:1.6.5.3]		7.37917	5.31431	11.6383	1.89508	60.1262	42.6621	0.720177		0.256815		8.1481	AcPro
H1geoC	H_contig_434	7076	8305	+	410	K02672	pilW; type IV pilus assembly protein PilW		50.0395	38.3505	39.1942	6.07812	35.3547	39.6933	0.766405		0.121466	EET	0.706536
H1geoC	H_contig_4504	4183	4566	+	128				34.6557	30.0279	41.848	0	200.753	38.5667	0.866463		ZERO		5.79279	AcPro
H1geoC	H_contig_4544	1744	1971	-	76				175.103	151.72	362.473	5246.38	173.39	30.3114	0.866463		29.9617	OC	0.99022
H1geoC	H_contig_455	3	287	+	95	K06281	E1.12.99.6L; hydrogenase large subunit [EC:1.12.99.6]		8.75513	14.7122	26.8498	68.2029	62.4204	30.6665	1.68041		7.79005	OC	7.12959	AcPro
H1geoC	H_contig_455	284	1456	+	391	K03620	hyaC; Ni/Fe-hydrogenase 1 B-type cytochrome subunit		20.563	31.2776	33.9228	49.7131	168.512	44.797	1.52106		2.4176		8.19493	AcPro
H1geoC	H_contig_456	2476	3126	-	217				0	1.61021	4.70181	202.119	75.9081	55.4979	∞		∞	OC	∞	AcPro
H1geoC	H_contig_4589	3	968	+	322	K03286	TC.OOP; OmpA-OmpF porin, OOP family		19.8033	16.2771	28.5175	162.524	302.84	39.7753	0.821941		8.20691	OC	15.2924	AcPro
H1geoC	H_contig_4647	1404	1700	-	99				11.2019	17.6473	10.306	473.234	86.5199	31.3907	1.57539		42.246	OC	7.72372	AcPro
H1geoC	H_contig_478	34609	36633	+	675	K00700	glgB; 1,4-alpha-glucan branching enzyme [EC:2.4.1.18]		8.21469	5.17653	5.29041	14.7676	60.5196	41.976	0.630155		1.7977		7.36724	AcPro
H1geoC	H_contig_485	1690	3093	+	468			1819 (8)	16.5874	18.6654	25.6163	13.8446	85.88	43.2023	1.12528		0.834648		5.17744	AcPro
H1geoC	H_contig_4888	1	831	+	277	K06871	K06871; uncharacterized protein		18.016	1.26143	5.52506	19.7923	173.641	39.0333	0.0700172		1.0986		9.63814	AcPro
H1geoC	H_contig_4928	429	542	-	38	K01682	acnB; aconitate hydratase 2 / 2-methylisocitrate dehydratase [EC:4.2.1.3 4.2.1.99]		21.8878	55.1709	80.5495	13.1159	416.136	37.0132	2.52062		0.599235		19.0122	AcPro
H1geoC	H_contig_505	8371	8655	-	95				2.91838	14.7122	10.7399	15.7391	62.4204	78.6577	5.04124		5.39311		21.3888	AcPro
H1geoC	H_contig_514	4333	4788	-	152				31.0078	36.7806	26.8498	6.55797	190.729	75.0367	1.18617		0.211495		6.15101	AcPro
H1geoC	H_contig_5151	462	1319	-	286	K02275	coxB; cytochrome c oxidase subunit II [EC:1.9.3.1]	coxB (1)	8.72452	6.10866	9.81051	0	52.9871	42.1439	0.700172		ZERO		6.07335	AcPro
H1geoC	H_contig_5151	1378	1671	-	98	K02277	coxD, ctaF; cytochrome c oxidase subunit IV [EC:1.9.3.1]		14.1452	7.13093	5.20558	5.08577	94.1261	36.2195	0.504124		0.359541		6.65428	AcPro
H1geoC	H_contig_5376	880	1104	-	75				118.292	246.92	394.513	425.306	1045.43	39.2429	2.08739		3.59541		8.83772	AcPro
H1geoC	H_contig_5410	3	1091	+	363	K00031	IDH1, IDH2, icd; isocitrate dehydrogenase [EC:1.1.1.42]		21.3854	48.1289	57.6199	10.9842	352.13	44.2918	2.25055		0.51363		16.4659	AcPro
H1geoC	H_contig_5603	3	125	-	41	K00175	korB; 2-oxoglutarate ferredoxin oxidoreductase subunit beta [EC:1.2.7.3]		33.8105	51.134	74.6556	48.625	401.758	39.9852	1.51237		1.43816		11.8826	AcPro
H1geoC	H_contig_5603	127	1140	-	338	K00174	korA; 2-oxoglutarate ferredoxin oxidoreductase subunit alpha [EC:1.2.7.3]		46.7545	78.5668	172.061	19.1695	678.376	54.0534	1.68041		0.410003		14.5093	AcPro
H1geoC	H_contig_568	3	293	+	97	K01579	panD; aspartate 1-decarboxylase [EC:4.1.1.11]		2.8582	3.60222	2.62962	0	115.474	58.4636	1.26031		ZERO		40.401	AcPro
H1geoC	H_contig_570	650	1627	-	326	K00161	PDHA, pdhA; pyruvate dehydrogenase E1 component subunit alpha [EC:1.2.4.1]		7.65402	21.4365	17.996	64.2118	44.4645	39.5361	2.80069		8.38929	OC	5.80929
H1geoC	H_contig_570	1611	2906	-	432	K01681	ACO, acnA; aconitate hydratase [EC:4.2.1.3]		14.119	25.0738	24.2084	92.2974	74.7344	39.4093	1.77589		6.53711	OC	5.29318	AcPro
H1geoC	H_contig_5726	3	92	+	30				9.24153	69.8831	161.546	0	65.8883	15.8324	7.56186	SP+	ZERO		7.12959	AcPro
H1geoC	H_contig_5726	558	1106	+	183	K03442	mscS; small conductance mechanosensitive channel		15.15	15.275	16.7261	13.6176	126.016	43.5054	1.00825		0.898852		8.31785	AcPro
H1geoC	H_contig_5804	3	740	+	246	K00175	korB; 2-oxoglutarate ferredoxin oxidoreductase subunit beta [EC:1.2.7.3]		30.4294	69.599	110.947	14.1823	425.863	40.7292	2.28723		0.466071		13.9951	AcPro
H1geoC	H_contig_5894	338	934	+	199				26.4707	19.3144	28.1991	32.5592	158.926	39.4921	0.729653		1.23001		6.00386	AcPro
H1geoC	H_contig_5967	652	774	-	41	K01647	CS, gltA; citrate synthase [EC:2.3.3.1]		87.9072	76.701	124.426	170.187	1783.8	41.7444	0.872522		1.93599		20.2919	AcPro
H1geoC	H_contig_616	37079	37924	+	282	K01491	folD; methylenetetrahydrofolate dehydrogenase (NADP+) / methenyltetrahydrofolate cyclohydrolase [EC:1.5.1.5 3.5.4.9]		62.921	44.6062	21.7084	1.7674	58.4116	91.4384	0.708924		0.0280891	EET	0.928331
H1geoC	H_contig_616	38138	38284	+	49	K00963	UGP2, galU, galF; UTP--glucose-1-phosphate uridylyltransferase [EC:2.7.7.9]		67.8969	14.2619	20.8223	0	40.3397	55.6441	0.210052		ZERO	EET	0.594132
H1geoC	H_contig_616	41179	42507	+	443	K03522	fixB, etfA; electron transfer flavoprotein alpha subunit		55.0737	55.2124	24.183	7.87549	60.9801	95.8115	1.00252		0.142999	EET	1.10725
H1geoC	H_contig_636	518	1219	+	234	K02030	ABC.PA.S; polar amino acid transport system substrate-binding protein		23.6962	34.3443	18.531	19.1695	157.681	48.0693	1.44936		0.808967		6.65428	AcPro
H1geoC	H_contig_6373	3	713	-	237	K00600	glyA, SHMT; glycine hydroxymethyltransferase [EC:2.1.2.1]		80.7171	117.946	74.2619	10.5149	105.644	49.1276	1.46123		0.130268	EET	1.30881
H1geoC	H_contig_639	23100	23750	-	217				2.55526	8.05105	9.40363	6.8904	51.6175	43.5831	3.15077		2.69656		20.2005	AcPro
H1geoC	H_contig_639	25817	26851	-	345				6.42889	21.2688	11.8295	15.8912	57.2941	39.6487	3.30831		2.47184		8.91198	AcPro
H1geoC	H_contig_639	27735	28982	-	416				6.66456	23.5184	26.3658	13.179	61.7702	40.0149	3.52887		1.97747		9.26846	AcPro
H1geoC	H_contig_639	30154	31020	-	289	K08253	E2.7.10.2; non-specific protein-tyrosine kinase [EC:2.7.10.2]		29.7392	53.1982	52.9564	43.1147	155.031	37.086	1.78883		1.44976		5.21303	AcPro
H1geoC	H_contig_639	31079	32563	-	495	K00903	E2.7.10.-; protein-tyrosine kinase [EC:2.7.10.-]		22.4037	45.177	58.2289	36.2477	143.756	41.0038	2.0165		1.61793		6.41663	AcPro
H1geoC	H_contig_639	34832	37477	-	882	K12600	SKI3, TTC37; superkiller protein 3		22.0036	35.2585	51.7666	31.0797	120.272	42.7946	1.60239		1.41248		5.46602	AcPro
H1geoC	H_contig_639	40524	41342	-	273	K02406	fliC; flagellin		4.06221	1.27991	1.86867	436.333	89.2991	41.9944	0.315077		107.413	OC	21.9829	AcPro
H1geoC	H_contig_654	5410	5796	-	129				8.59677	13.5432	7.90925	7.72722	51.0762	38.8593	1.57539		0.898852		5.94132	AcPro
H1geoC	H_contig_654	5906	6181	-	92				3.01354	15.192	11.0901	0	71.6177	40.0227	5.04124		ZERO		23.7653	AcPro
H1geoC	H_contig_654	6183	6374	-	64				0	21.8385	11.9566	0	113.245	38.1788	∞		∞		∞	AcPro
H1geoC	H_contig_667	2	136	-	45	K09815	znuA; zinc transport system substrate-binding protein		0	7.76479	0	0	58.5673	32.9435	∞		∞		∞	AcPro
H1geoC	H_contig_767	5207	5479	-	91	K04564	SOD2; superoxide dismutase, Fe-Mn family [EC:1.15.1.1]		12.1866	15.3589	5.60601	82.1548	202.733	32.7563	1.26031		6.74139	OC	16.6357	AcPro
H1geoC	H_contig_811	862	1470	+	203				1.36574	1.72126	0	341.273	51.9316	43.7065	1.26031		249.881	OC	38.0245	AcPro
H1geoC	H_contig_851	1374	1694	-	107	K08906	petJ; cytochrome c6	petJ (1)	75.1414	71.8425	42.9095	88.502	529.569	40.9054	0.956097		1.17781		7.04764	AcPro
H1geoC	H_contig_869	17308	18666	-	453			omcS (6)	1.22404	0	1.12615	0	50.907	39.0729	ZERO		ZERO		41.5892	AcPro
H1geoC	H_contig_869	22446	22682	-	79				0	4.42298	3.22878	31.5447	350.292	43.778	∞		∞		∞	AcPro
H1geoC	H_contig_869	22807	24168	-	454	K01362	E3.4.21.-		0	0	0.561836	10.9781	179.959	43.2818	∞		∞		∞	AcPro
H1geoC	H_contig_869	24256	25668	-	471	K01362	E3.4.21.-		0.588632	0.741859	1.08311	13.7564	235.015	42.5145	1.26031		23.3702		399.257	AcPro
H1geoC	H_contig_869	25715	26086	-	124				0	0	0	16.0776	286.933	41.7004	∞		∞		∞	AcPro
H1geoC	H_contig_911	3	566	+	188	K01362	E3.4.21.-		14.7471	13.0102	29.849	13.2555	94.6267	37.4686	0.882217		0.898852		6.41663	AcPro
H1geoC	H_contig_913	5371	6492	+	374	K11997	TRIM2_3; tripartite motif-containing protein 2/3		51.8909	64.4644	73.6576	3.99791	59.8984	43.2356	1.24231		0.0770445	EET	1.15431
H1geoC	H_contig_913	12711	13505	+	265			ctcA (3)	93.1127	122.625	170.37	54.5425	1141.23	43.1232	1.31695		0.585769		12.2565	AcPro
H1geoC	H_contig_913	13622	16519	+	966			omcB (9)	82.0831	124.43	209.921	58.8181	1207.27	41.4592	1.5159		0.716567		14.7079	AcPro
H1geoC	H_contig_913	17506	18294	+	263			ctcA (3)	20.0292	33.2144	44.6136	157.292	225.473	39.7556	1.6583		7.85313	OC	11.2572	AcPro
H1geoC	H_contig_913	25160	25807	-	216				2.56709	0	0	53.071	48.8061	39.2272	ZERO		20.6736	OC	19.0122
H1geoC	H_contig_913	70039	70794	+	252				64.9107	38.824	50.6098	7.9112	159.491	41.4283	0.598113		0.121878	EET	2.45709
H1geoC	H_contig_925	3665	4570	+	302	K00075	murB; UDP-N-acetylmuramate dehydrogenase [EC:1.3.1.98]		9.18032	21.9831	21.96	11.5525	50.1798	37.8494	2.39459		1.25839		5.46602	AcPro
H1geoC	H_contig_940	1012	1923	+	304	K12511	tadC; tight adherence protein C		10.9439	4.59757	15.103	6.55797	60.6865	41.3119	0.420103		0.599235		5.54523	AcPro
H1geoC	H_contig_940	2120	3988	+	623	K13735	yeeJ; adhesin/invasin		13.7955	15.7041	20.4714	5.60007	112.105	43.3521	1.13834		0.405933		8.12619	AcPro
H1geoC	H_contig_940	4631	4729	+	33				0	31.7651	7.7295	15.1032	59.8984	24.5065	∞		∞		∞	AcPro
H1geoC	H_contig_990	1053	1706	+	218				1.27177	3.20565	1.17006	210.336	81.6047	41.1094	2.52062		165.389	OC	64.1663	AcPro
H1geoC	H_contig_990	3628	3741	-	38				72.9594	36.7806	13.4249	13.1159	121.373	64.5076	0.504124		0.17977	EET	1.66357
H1geoD	H_contig_1007	5258	5617	+	120				3.45664	16.0352	30.3275	0	59.2054	22.6041	4.63896		ZERO		17.128	AcPro
H1geoD	H_contig_1108	4992	5753	+	254	K04114	badF; benzoyl-CoA reductase subunit [EC:1.3.7.8]		170.655	189.392	123.579	9.04901	232.16	87.0644	1.1098		0.0530253	EET	1.36041
H1geoD	H_contig_1108	5777	6754	+	326	K01726	E4.2.1.-		115.787	136.742	97.6806	7.05046	148.195	83.0651	1.18098		0.0608917	EET	1.27989
H1geoD	H_contig_1146	2157	2441	+	95				1034.81	975.617	2015.98	6885.67	568.371	35.8741	0.942799		6.65405	OC	0.549252
H1geoD	H_contig_1244	1768	2076	+	103			ppcL (3)	4.02716	24.9091	4.41663	8.92602	103.466	28.4128	6.18528		2.21646		25.692	AcPro
H1geoD	H_contig_1422	1	945	+	315	K00341	nuoL; NADH-quinone oxidoreductase subunit L [EC:1.6.5.3]		3.95045	14.2535	20.2183	0	65.4078	13.0569	3.60808		ZERO		16.5571	AcPro
H1geoD	H_contig_1547	1050	2441	+	464			omcY (7)	11.6215	20.044	25.4908	13.87	73.4963	15.312	1.72474		1.19348		6.32418	AcPro
H1geoD	H_contig_1697	4515	5051	+	179	K00532	E1.12.7.2; ferredoxin hydrogenase [EC:1.12.7.2]	na (1)	12.7452	21.4998	17.7899	5.1362	79.3815	14.4998	1.6869		0.402992		6.22836	AcPro
H1geoD	H_contig_1815	952	2283	-	444				15.8819	7.94538	10.2458	7.24736	110.41	13.3962	0.50028		0.456329		6.95195	AcPro
H1geoD	H_contig_1852	6429	6680	+	84	K03385	nrfA; cytochrome c-552 [EC:1.7.2.2]	nrfA (1)	12.3452	11.4537	0	0	84.5791	10.2801	0.927792		ZERO		6.8512	AcPro
H1geoD	H_contig_1926	3466	3969	+	168				35.8009	61.0866	51.4485	32.835	236.821	13.1247	1.70628		0.917155		6.61495	AcPro
H1geoD	H_contig_1954	1048	1581	-	178				10.4864	12.612	2.55569	0	63.862	20.23	1.20269		ZERO		6.08995	AcPro
H1geoD	H_contig_1999	3639	4580	+	314				25.7597	33.7046	62.297	48.3114	214.949	14.9414	1.30843		1.87546		8.34441	AcPro
H1geoD	H_contig_1999	4656	5057	+	134	K07216	K07216; hemerythrin		12.382	11.9666	6.78974	10.2916	84.8316	12.479	0.96645		0.831171		6.8512	AcPro
H1geoD	H_contig_2020	2	256	+	85				36.5997	120.736	21.4077	16.2243	919.424	33.416	3.29882		0.443291		25.1211	AcPro
H1geoD	H_contig_2119	308	595	+	96				4.3208	0	4.73867	4.78844	59.2054	7.67342	ZERO		1.10823		13.7024	AcPro
H1geoD	H_contig_2119	673	951	+	93				13.3805	6.89687	24.4577	24.7145	229.182	19.7318	0.51544		1.84705		17.128	AcPro
H1geoD	H_contig_212	1921	2064	-	48				51.8496	46.7694	37.9094	9.57687	88.808	58.8523	0.90202		0.184705	EET	1.7128
H1geoD	H_contig_2126	3	506	+	168	K03385	nrfA; cytochrome c-552 [EC:1.7.2.2]	nrfA (1)	9.87612	11.4537	10.8313	2.73625	54.9764	11.2891	1.15974		0.277057		5.5666	AcPro
H1geoD	H_contig_2198	8923	10887	+	655	K01183	E3.2.1.14; chitinase [EC:3.2.1.14]		12.3489	6.85476	11.1124	14.7381	87.8589	13.9999	0.555089		1.19348		7.11471	AcPro
H1geoD	H_contig_2338	1185	1280	-	32	K02535	lpxC; UDP-3-O-[3-hydroxymyristoyl] N-acetylglucosamine deacetylase [EC:3.5.1.108]		64.812	160.352	241.672	86.1919	421.838	60.9944	2.47411		1.32987		6.50864	AcPro
H1geoD	H_contig_2343	524	1192	+	223				156.246	54.6492	110.158	859.6	669.047	9.67897	0.349763		5.50156	OC	4.282
H1geoD	H_contig_2347	3	1235	+	411	K06281	E1.12.99.6L; hydrogenase large subunit [EC:1.12.99.6]		7.06467	12.4849	13.2821	19.0139	69.1449	15.9579	1.76722		2.69141		9.78743	AcPro
H1geoD	H_contig_2347	1775	2440	+	222	K03620	hyaC; Ni/Fe-hydrogenase 1 B-type cytochrome subunit		4.67114	14.4462	4.09831	10.3534	51.2046	12.0262	3.09264		2.21646		10.9619	AcPro
H1geoD	H_contig_2394	746	2113	-	456	K07792	dcuB; anaerobic C4-dicarboxylate transporter DcuB		0.454821	2.1099	0	105.85	0	21.4389	4.63896		232.728	OC	ZERO
H1geoD	H_contig_2406	5413	8370	-	986			omcB (9)	34.0756	11.384	29.0664	16.3176	180.138	7.25218	0.334082		0.478864		5.28642	AcPro
H1geoD	H_contig_2517	3376	3843	-	156	K03594	bfr; bacterioferritin		0	0	2.91611	53.0411	18.217	28.6023	∞		∞	OC	∞
H1geoD	H_contig_2835	5160	6197	-	346	K00428	E1.11.1.5; cytochrome c peroxidase [EC:1.11.1.5]	macA (1)	28.772	38.9295	38.1285	30.5574	162.216	16.2529	1.35303		1.06205		5.63797	AcPro
H1geoD	H_contig_3037	3	137	+	45	K01647	CS, gltA; citrate synthase [EC:2.3.3.1]		4.60886	0	0	0	189.457	3.48771	ZERO		ZERO		41.1072	AcPro
H1geoD	H_contig_3037	198	1289	+	364	K01647	CS, gltA; citrate synthase [EC:2.3.3.1]		14.8142	29.0749	51.2402	59.3556	1091.07	21.0796	1.96264		4.00667		73.6504	AcPro
H1geoD	H_contig_3150	340	1125	+	262	K14393	actP; cation/acetate symporter		64.911	46.5144	36.4625	3.50908	24.4053	28.1707	0.716588		0.0540599	EET	0.37598
H1geoD	H_contig_3224	6745	7146	+	134				18.573	45.473	37.3436	17.1526	121.945	12.0661	2.44834		0.923524		6.56573	AcPro
H1geoD	H_contig_3231	12257	12811	-	185	K00540	E1.-.-.-		15.695	20.8025	22.1309	7.45443	134.412	13.4616	1.32542		0.474955		8.564	AcPro
H1geoD	H_contig_3332	3	740	+	246	K00175	korB; 2-oxoglutarate ferredoxin oxidoreductase subunit beta [EC:1.2.7.3]		7.58775	10.4294	9.24619	5.60597	213.717	12.7433	1.37451		0.738819		28.166	AcPro
H1geoD	H_contig_3332	760	924	+	55	K00177	korG; 2-oxoglutarate ferredoxin oxidoreductase subunit gamma [EC:1.2.7.3]		3.77088	5.83099	0	0	142.093	11.4019	1.54632		ZERO		37.6816	AcPro
H1geoD	H_contig_3350	9452	9625	-	58	K03116	tatA; sec-independent protein translocase protein TatA		60.7892	5.52939	23.53	7.92569	0	10.7226	0.09096	SP	0.13038	EET	ZERO	Suc
H1geoD	H_contig_3381	1923	3110	+	396	K01999	livK; branched-chain amino acid transport system substrate-binding protein		18.8544	32.3944	55.1409	6.965	202.733	57.0202	1.71813		0.369409		10.7526	AcPro
H1geoD	H_contig_347	3131	4507	+	459	K03286	TC.OOP; OmpA-OmpF porin, OOP family		23.0443	18.1663	12.8842	68.1022	235.274	29.8601	0.78832		2.95528		10.2096	AcPro
H1geoD	H_contig_3541	2	115	-	38				81.8678	151.913	215.485	181.457	523.5	72.0906	1.85558		2.21646		6.39445	AcPro
H1geoD	H_contig_3541	146	538	-	131	K07714	atoC; two-component system, NtrC family, response regulator AtoC		6.33278	7.34438	6.94523	17.5454	54.2339	13.7832	1.15974		2.77057		8.564	AcPro
H1geoD	H_contig_3551	2	127	-	42	K04487	iscS, NFS1; cysteine desulfurase [EC:2.8.1.7]		0	15.2716	10.8313	0	50.7474	6.405	∞		∞		∞	AcPro
H1geoD	H_contig_3580	7378	7494	+	39				15.9537	49.3392	46.6577	11.7869	200.387	9.433	3.09264		0.738819		12.5605	AcPro
H1geoD	H_contig_3632	3	119	+	39				21.2716	57.5624	0	11.7869	273.255	9.97875	2.70606		0.554114		12.846	AcPro
H1geoD	H_contig_3663	3	1103	+	367	K01362	E3.4.21.-		11.8675	22.7202	19.8327	7.51537	71.6272	18.5419	1.91449		0.633273		6.03558	AcPro
H1geoD	H_contig_3787	2071	2625	-	185				12.3318	26.0031	31.9668	109.332	30.7228	14.1134	2.10862		8.86583	OC	2.49134
H1geoD	H_contig_3787	2657	3493	-	279	K02482	K02482; two-component system, NtrC family, sensor kinase [EC:2.7.13.3]	1295 (1)	26.0177	35.6338	99.4612	525.595	40.7435	16.2655	1.3696		20.2014	OC	1.56599
H1geoD	H_contig_3801	2474	3439	-	322	K07792	dcuB; anaerobic C4-dicarboxylate transporter DcuB		168.753	174.296	165.294	375.461	8.82564	13.5781	1.03285		2.22492		0.0522992	Suc
H1geoD	H_contig_3931	105	839	-	245	K08354	phsC; thiosulfate reductase cytochrome b subunit		34.7075	51.0509	81.6986	656.7	37.6981	13.3074	1.47089		18.921	OC	1.08617
H1geoD	H_contig_3931	836	1879	-	348			cbcA (5)	65.557	82.0193	192.161	1005.24	71.4547	16.3411	1.25111		15.3339	OC	1.08996
H1geoD	H_contig_3931	1944	2597	-	218				170.295	176.535	459.086	1088.07	78.2162	13.6815	1.03664		6.38934	OC	0.459298
H1geoD	H_contig_3931	2630	2803	-	58				139.458	154.823	384.323	959.008	73.4963	8.78137	1.11018		6.8767	OC	0.527015
H1geoD	H_contig_3948	8336	9082	+	249			ctcA (3)	25.8207	16.7436	18.2696	7.38458	148.37	6.20038	0.648457		0.285994		5.74617	AcPro
H1geoD	H_contig_4006	5475	5627	-	51				16.2666	25.1533	8.91986	9.01353	97.5147	11.0158	1.54632		0.554114		5.9948	AcPro
H1geoD	H_contig_408	1426	1521	+	32	K02967	RP-S2, MRPS2, rpsB; small subunit ribosomal protein S2		97.2181	60.1321	14.216	0	133.212	59.7254	0.618528		ZERO	EET	1.37024
H1geoD	H_contig_4188	3	449	+	149			omcQ (6)	65.421	64.5714	146.549	885.443	23.8411	23.6537	0.987013		13.5345	OC	0.364425
H1geoD	H_contig_4221	3	158	+	52	K03704	cspA; cold shock protein (beta-ribbon, CspA family)		881.444	1159.47	463.661	150.283	956.394	83.0801	1.31542		0.170497	EET	1.08503
H1geoD	H_contig_4338	3	173	+	57				25.47	56.264	31.9237	16.1295	174.5	13.1245	2.20903		0.633273		6.8512	AcPro
H1geoD	H_contig_4359	2972	3082	-	37				11.2107	8.66769	36.8848	12.4241	96.0087	84.324	0.77316		1.10823		8.564	AcPro
H1geoD	H_contig_4363	2703	3041	+	113				9.17693	2.83809	4.02578	4.06805	62.8729	38.6757	0.309264		0.443291		6.8512	AcPro
H1geoD	H_contig_437	3500	4282	+	261	K15022	fdhB; formate dehydrogenase beta subunit [EC:1.2.1.43]		3.17852	3.68626	1.74296	3.52253	54.4417	18.5002	1.15974		1.10823		17.128	AcPro
H1geoD	H_contig_4382	2292	2597	-	102			ppcD (3)	12.1999	22.0091	4.45993	0	69.6534	14.6929	1.80404		ZERO		5.70933	AcPro
H1geoD	H_contig_4465	3	533	+	177	K00600	glyA, SHMT; glycine hydroxymethyltransferase [EC:2.1.2.1]		161.701	181.189	244.162	12.9856	180.627	82.9211	1.12052		0.0803064	EET	1.11704
H1geoD	H_contig_4800	2	1207	-	402	K01676	E4.2.1.2A, fumA, fumB; fumarate hydratase, class I [EC:4.2.1.2]		6.70692	6.38218	31.6855	10.2916	106.039	19.8136	0.951582		1.53447		15.8105	AcPro
H1geoD	H_contig_5037	1078	1428	-	117				10.6358	10.9643	7.77629	19.6449	54.6511	38.601	1.03088		1.84705		5.1384	AcPro
H1geoD	H_contig_539	22996	23124	+	43				0	0	0	32.0714	66.0897	61.3572	∞		∞		∞	AcPro
H1geoD	H_contig_548	3	320	+	106	K01067	E3.1.2.1, ACH1; acetyl-CoA hydrolase [EC:3.1.2.1]		1.95659	3.02552	0	199.488	395.447	31.9769	1.54632		101.957	OC	202.11	AcPro
H1geoD	H_contig_564	3133	3990	+	286	K12686	K12686, estA, apeE, lip-1; outer membrane lipase/esterase		7.97687	8.97076	9.54362	30.5388	57.1352	6.90114	1.1246		3.82843		7.16262	AcPro
H1geoD	H_contig_5792	2	874	-	291	K00031	IDH1, IDH2, icd; isocitrate dehydrogenase [EC:1.1.1.42]		3.56355	5.51039	6.2531	0	68.3608	8.21684	1.54632		ZERO		19.1834	AcPro
H1geoD	H_contig_5879	130	318	-	63				13.1682	101.811	173.3	14.5933	124.049	22.9519	7.7316	SP+	1.10823		9.4204	AcPro
H1geoD	H_contig_5879	968	1567	-	200	K07275	ompW; outer membrane protein		6.22196	28.8634	27.2948	4.5969	56.8371	13.1544	4.63896		0.738819		9.13493	AcPro
H1geoD	H_contig_5879	1770	2078	-	103				10.0679	43.5909	30.9164	26.7781	55.1817	28.7802	4.3297		2.65975		5.48096	AcPro
H1geoD	H_contig_5996	3	623	+	207	K13380	nuoBCD; NADH-quinone oxidoreductase subunit B/C/D [EC:1.6.5.3]		10.0193	13.9437	4.39529	2.22072	51.4829	36.9294	1.39169		0.221646		5.1384	AcPro
H1geoD	H_contig_6368	956	1099	-	48				0	0	9.47735	19.1537	59.2054	7.67335	∞		∞		∞	AcPro
H1geoD	H_contig_6499	3	395	+	131	K00342	nuoM; NADH-quinone oxidoreductase subunit M [EC:1.6.5.3]		9.49917	14.6888	107.651	3.50908	173.549	24.2693	1.54632		0.369409		18.2699	AcPro
H1geoD	H_contig_6499	616	861	+	82	K00342	nuoM; NADH-quinone oxidoreductase subunit M [EC:1.6.5.3]		40.468	121.242	144.241	39.2418	207.941	48.4357	2.996		0.9697		5.1384	AcPro
H1geoD	H_contig_662	2552	3835	+	428	K01624	FBA, fbaA; fructose-bisphosphate aldolase, class II [EC:4.1.2.13]		19.383	20.2314	34.0122	7.51829	101.258	20.6312	1.04377		0.38788		5.22404	AcPro
H1geoD	H_contig_7807	3	551	-	183	K00343	nuoN; NADH-quinone oxidoreductase subunit N [EC:1.6.5.3]		4.5333	12.2674	32.3162	5.02393	54.3525	15.9501	2.70606		1.10823		11.9896	AcPro
H1geoD	H_contig_7905	194	568	+	125	K00185	K00185; prokaryotic molybdopterin-containing oxidoreductase family, membrane subunit		68.0267	20.5251	80.0646	3.67752	11.3674	14.3968	0.301721		0.0540599	EET	0.167102	Suc
H1geoD	H_contig_894	179	1081	+	301	K03074	secF; preprotein translocase subunit SecF		77.1715	61.7969	98.237	7.63604	77.8914	41.5165	0.800773		0.098949	EET	1.00933
H1geoD	H_contig_909	1045	1473	+	143				15.9537	13.4561	22.2685	96.4384	89.4291	16.3807	0.843448		6.04488	OC	5.60553	AcPro
H1geoD	H_contig_914	1	276	+	92				256.994	240.528	237.346	14.9899	355.232	45.169	0.935931		0.0583278	EET	1.38226
H1geoD	H_contig_933	1030	1773	-	248	K02030	ABC.PA.S; polar amino acid transport system substrate-binding protein		8.36284	14.2248	3.66865	3.70718	71.6194	15.0502	1.70095		0.443291		8.564	AcPro
H1geoD	H_contig_960	4817	4987	+	57				10.9157	5.6264	23.9428	88.7121	24.9286	12.52	0.51544		8.12701	OC	2.28373
H1geoD	H_contig_983	5781	6167	-	129	K00240	sdhB; succinate dehydrogenase iron-sulfur subunit [EC:1.3.99.1]		9.64644	22.3747	35.2646	10.6905	170.732	17.6412	2.31948		1.10823		17.6989	AcPro
H2geo	H_contig_119	8832	10367	-	512	K01067	E3.1.2.1, ACH1; acetyl-CoA hydrolase [EC:3.1.2.1]		1.47707	0.693377	0.579623	247.627	39.8932	35.043	0.469426		167.647	OC	27.0082
H2geo	H_contig_119	10485	11801	-	439	K01647	CS, gltA; citrate synthase [EC:2.3.3.1]		1.72269	0.808677	0	107.12	41.3572	32.5015	0.469426		62.1817	OC	24.0073
H2geo	H_contig_119	11824	13296	-	491	K01720	prpD; 2-methylcitrate dehydratase [EC:4.2.1.79]		3.59391	2.89213	1.20883	62.9112	18.4886	34.7251	0.80473		17.5049	OC	5.14442
H2geo	H_contig_119	14184	14879	-	232	K05799	pdhR; GntR family transcriptional regulator, transcriptional repressor for pyruvate dehydrogenase complex		1.08658	4.59063	1.27917	105.323	29.3467	37.0192	4.22483		96.9302	OC	27.0082
H2geo	H_contig_119	130712	131185	-	158	K00680	E2.3.1.-		87.7519	76.3943	13.1479	8.75384	90.9706	32.5595	0.870572		0.0997567	EET	1.03668
H2geo	H_contig_119	135624	137012	-	463	K00903	E2.7.10.-; protein-tyrosine kinase [EC:2.7.10.-]		50.0908	24.5363	14.1012	8.96182	53.9185	43.5559	0.489836		0.178911	EET	1.07641
H2geo	H_contig_119	137107	137781	-	225	K01991	ABC-2.OM, wza; polysaccharide export outer membrane protein		70.5845	44.1789	9.23275	10.2452	36.9841	37.3628	0.625901		0.145149	EET	0.523969
H2geo	H_contig_119	150153	152414	+	754	K00029	E1.1.1.40, maeB; malate dehydrogenase (oxaloacetate-decarboxylating)(NADP+) [EC:1.1.1.40]		15.3793	8.94585	3.54231	11.0062	134.443	36.3571	0.58168		0.715646		8.74179	AcPro
H2geo	H_contig_119	233127	233420	+	98				149.195	97.8086	33.3106	28.2267	339.65	34.8612	0.655578		0.189194	EET	2.27656
H2geo	H_contig_119	304686	305132	-	149	K01808	rpiB; ribose 5-phosphate isomerase B [EC:5.3.1.6]		65.9826	52.4174	15.9338	6.1884	55.8484	32.6101	0.794413		0.0937883	EET	0.846412
H2geo	H_contig_119	305142	306326	-	395	K09458	fabF; 3-oxoacyl-[acyl-carrier-protein] synthase II [EC:2.3.1.179]		66.3724	71.0018	26.2958	4.66872	97.6737	37.7295	1.06975		0.0703412	EET	1.4716
H2geo	H_contig_119	306460	306693	-	78	K02078	acpP; acyl carrier protein		129.276	91.0279	19.0235	0	174.575	31.302	0.704139		ZERO	EET	1.35041
H2geo	H_contig_119	306793	307530	-	246	K00059	fabG; 3-oxoacyl-[acyl-carrier protein] reductase [EC:1.1.1.100]		60.46	40.4075	30.1593	0	55.3531	36.4659	0.668335		ZERO	EET	0.915533
H2geo	H_contig_119	309609	310649	-	347	K03621	plsX; glycerol-3-phosphate acyltransferase PlsX [EC:2.3.1.15]		60.2976	35.8078	15.3943	2.65727	56.6824	36.8102	0.593852		0.0440692	EET	0.940045
H2geo	H_contig_119	315611	317704	-	698	K00962	pnp, PNPT1; polyribonucleotide nucleotidyltransferase [EC:2.7.7.8]		52.7289	57.9814	52.7208	7.2656	149.564	35.3808	1.09961		0.137792	EET	2.83648
H2geo	H_contig_119	317886	318152	-	89	K02956	RP-S15, MRPS15, rpsO; small subunit ribosomal protein S15		90.6382	123.655	20.0068	5.18018	263.497	37.6358	1.36427		0.0571523	EET	2.90714
H2geo	H_contig_137	17001	17837	-	279	K03089	SIG3.3.1, rpoH; RNA polymerase sigma-32 factor		10.8425	13.9968	15.9552	14.8721	111.169	36.6328	1.29092		1.37165		10.2531	AcPro
H2geo	H_contig_137	25025	25642	+	206	K02897	RP-L25, rplY; large subunit ribosomal protein L25		94.2268	63.7638	43.2185	6.71411	172.598	36.174	0.676705		0.0712548	EET	1.83173
H2geo	H_contig_137	27764	28132	+	123	K02990	RP-S6, MRPS6, rpsF; small subunit ribosomal protein S6		135.266	66.3838	7.23822	3.74826	129.157	32.7198	0.490763		0.0277102	EET	0.954836
H2geo	H_contig_137	28158	28433	+	92	K02963	RP-S18, MRPS18, rpsR; small subunit ribosomal protein S18		104.123	34.7291	19.3544	5.01126	82.2275	34.4062	0.333539		0.0481282	EET	0.789714
H2geo	H_contig_137	28449	29393	+	315				76.8266	59.7317	18.8424	10.2452	91.2594	34.6463	0.777487		0.133355	EET	1.18786
H2geo	H_contig_137	29416	29862	+	149	K02939	RP-L9, MRPL9, rplI; large subunit ribosomal protein L9		79.5175	40.5044	21.909	9.2826	96.4655	33.8684	0.509377		0.116737	EET	1.21314
H2geo	H_contig_137	41695	42522	-	276	K02482	K02482; two-component system, NtrC family, sensor kinase [EC:2.7.13.3]	1295 (1)	96.8162	90.0385	35.483	16.7042	43.8546	35.9556	0.929995		0.172535	EET	0.452968
H2geo	H_contig_137	42673	43662	-	330			omcQ (12)	164.239	152.761	63.8499	22.3532	75.6493	36.744	0.930118		0.136102	EET	0.460605
H2geo	H_contig_137	44485	45504	-	340			cbcA (6)	1093.61	716.283	709.623	774.269	215.823	36.4947	0.654968		0.707991		0.197348	Suc
H2geo	H_contig_137	45603	45854	-	84				1290.45	748.055	833.774	965.979	225.147	31.424	0.579686		0.748562		0.174472	Suc
H2geo	H_contig_137	45893	46093	-	67				1328.16	874.276	974.459	1176.67	191.946	32.2524	0.65826		0.885941		0.14452	Suc
H2geo	H_contig_137	46185	46571	-	129				1750.93	759.554	1309	1283.04	228.707	33.7513	0.4338		0.732774		0.13062	Suc
H2geo	H_contig_137	46625	46873	-	83				1688.68	799.84	1244.28	1044.27	227.859	30.6856	0.473647		0.618396		0.134933	Suc
H2geo	H_contig_137	166880	167086	-	69				120.564	36.0154	38.7088	20.045	361.801	39.4638	0.298726		0.166261	EET	3.00091
H2geo	H_contig_137	173363	173677	+	105	K04065	osmY; hyperosmotically inducible periplasmic protein		55.2191	27.0483	28.2635	4.39082	129.684	36.7792	0.489836		0.0795162	EET	2.34854
H2geo	H_contig_137	271923	272237	-	105				110.438	71.0018	22.6108	0	115.275	37.6076	0.642909		ZERO	EET	1.0438
H2geo	H_contig_137	272240	272632	-	131				75.0489	43.3599	18.1232	10.5581	161.693	35.3972	0.577755		0.140682	EET	2.1545
H2geo	H_contig_137	272840	273715	-	292	K01902	sucD; succinyl-CoA synthetase alpha subunit [EC:6.2.1.5]		70.7917	6.07892	3.04898	31.5778	209.849	34.8414	0.0858706	SP	0.446066		2.96432
H2geo	H_contig_145	18053	18823	+	257	K02967	RP-S2, MRPS2, rpsB; small subunit ribosomal protein S2		87.2987	53.873	19.6305	5.38174	105.968	38.0413	0.61711		0.0616474	EET	1.21385
H2geo	H_contig_145	18901	19551	+	217	K02357	tsf, TSFM; elongation factor Ts		135.918	68.7114	38.2925	14.8721	139.446	36.8368	0.505536		0.10942	EET	1.02595
H2geo	H_contig_145	30302	31318	+	339	K00053	ilvC; ketol-acid reductoisomerase [EC:1.1.1.86]		105.594	61.7862	35.0168	8.15992	142.819	38.0914	0.585129		0.0772763	EET	1.35252
H2geo	H_contig_145	33443	34999	+	519	K01649	leuA; 2-isopropylmalate synthase [EC:2.3.3.13]		67.029	8.89233	9.14889	20.4313	77.2526	34.6572	0.132664	SP	0.304812		1.15253
H2geo	H_contig_145	35781	35981	-	67	K03704	cspA; cold shock protein (beta-ribbon, CspA family)		112.875	74.181	22.1468	0	350.019	35.9005	0.657196		ZERO	EET	3.10094
H2geo	H_contig_145	50252	50458	-	69				10.9603	5.14506	0	20.045	54.8183	32.6554	0.469426		1.82887		5.00152	AcPro
H2geo	H_contig_145	62394	64019	-	542	K01676	E4.2.1.2A, fumA, fumB; fumarate hydratase, class I [EC:4.2.1.2]		23.2553	26.1999	9.30819	15.3111	167.489	35.5534	1.12662		0.658394		7.20219	AcPro
H2geo	H_contig_145	93297	95057	+	587	K02945	RP-S1, rpsA; small subunit ribosomal protein S1		69.1415	55.0355	35.8952	9.42492	85.0571	36.4903	0.795983		0.136313	EET	1.23019
H2geo	H_contig_145	104764	105090	+	109	K03530	hupB; DNA-binding protein HU-beta		16.1891	19.5418	19.0584	8.45937	117.985	36.5553	1.2071		0.522535		7.28793	AcPro
H2geo	H_contig_145	110944	111621	+	226	K00640	cysE; serine O-acetyltransferase [EC:2.3.1.30]		53.5407	21.9917	22.3232	4.07996	26.7785	35.9158	0.410748		0.076203	EET	0.500152
H2geo	H_contig_145	142244	143572	+	443	K01647	CS, gltA; citrate synthase [EC:2.3.3.1]		88.2021	89.754	37.5146	133.211	884.567	36.6814	1.01759		1.51029		10.0289	AcPro
H2geo	H_contig_145	146086	146325	+	80				1534.58	1260.28	118.707	51.8665	3498.78	36.3215	0.821254		0.0337985	EET	2.27996
H2geo	H_contig_145	146491	146904	+	138	K00940	E2.7.4.6, ndk; nucleoside-diphosphate kinase [EC:2.7.4.6]		76.7222	36.0154	0	3.34084	93.1911	36.734	0.469426		0.0435446	EET	1.21466
H2geo	H_contig_145	269167	270438	+	424	K01624	FBA, fbaA; fructose-bisphosphate aldolase, class II [EC:4.1.2.13]		51.7255	33.4914	18.198	7.61144	130.245	36.077	0.647484		0.147151	EET	2.51801
H2geo	H_contig_1598	70	2145	-	692	K02355	fusA, GFM, EFG; elongation factor G		134.058	98.4996	42.0277	5.99613	136.65	39.1001	0.734754		0.0447279	EET	1.01933
H2geo	H_contig_1598	2188	2658	-	157	K02992	RP-S7, MRPS7, rpsG; small subunit ribosomal protein S7		158.96	110.799	20.7926	8.8096	183.1	35.1873	0.697026		0.0554204	EET	1.15187
H2geo	H_contig_1598	3186	7334	-	1383	K03046	rpoC; DNA-directed RNA polymerase subunit beta' [EC:2.7.7.6]		63.432	63.6603	57.508	8.33398	73.2972	38.4271	1.0036		0.131385	EET	1.15552
H2geo	H_contig_1598	7441	11553	-	1371	K03043	rpoB; DNA-directed RNA polymerase subunit beta [EC:2.7.7.6]		59.7581	61.3692	41.9933	4.03532	81.6637	39.2192	1.02696		0.0675276	EET	1.36657
H2geo	H_contig_1598	11727	12110	-	128	K02935	RP-L7, MRPL12, rplL; large subunit ribosomal protein L7/L12		179.218	116.487	55.6438	10.8055	171.393	37.9496	0.649974		0.0602925	EET	0.956335
H2geo	H_contig_1598	12883	13584	-	234	K02863	RP-L1, MRPL1, rplA; large subunit ribosomal protein L1		128.198	80.408	48.1929	15.7619	96.9862	36.0283	0.627216		0.122949	EET	0.756533
H2geo	H_contig_1598	13608	14030	-	141	K02867	RP-L11, MRPL11, rplK; large subunit ribosomal protein L11		114.423	80.5694	18.9426	6.53951	128.765	35.5796	0.704139		0.0571523	EET	1.12534
H2geo	H_contig_1598	14100	14627	-	176	K02601	nusG; transcriptional antiterminator NusG		78.7773	42.359	20.2341	2.61952	85.9651	37.0838	0.537706		0.0332522	EET	1.09124
H2geo	H_contig_1598	14639	14824	-	62	K03073	secE; preprotein translocase subunit SecE		101.648	45.8076	38.2925	0	109.813	31.7443	0.450649		ZERO	EET	1.08033
H2geo	H_contig_172	64	372	+	103	K02946	RP-S10, MRPS10, rpsJ; small subunit ribosomal protein S10		222.718	144.761	83.5558	13.4282	271.75	37.5641	0.649974		0.0602925	EET	1.22015
H2geo	H_contig_172	402	1037	+	212	K02906	RP-L3, MRPL3, rplC; large subunit ribosomal protein L3		231.873	149.037	123.186	26.0964	292.606	34.17	0.642752		0.112546	EET	1.26192
H2geo	H_contig_172	1061	1684	+	208	K02926	RP-L4, MRPL4, rplD; large subunit ribosomal protein L4		186.642	133.128	67.058	6.64955	207.308	41.7439	0.713283		0.0356274	EET	1.11073
H2geo	H_contig_172	1681	1965	+	95	K02892	RP-L23, MRPL23, rplW; large subunit ribosomal protein L23		169.827	153.214	59.3534	14.559	127.409	36.9499	0.902178		0.0857284	EET	0.750229
H2geo	H_contig_172	1989	2813	+	275	K02886	RP-L2, MRPL2, rplB; large subunit ribosomal protein L2		163.169	109.73	78.7782	13.4119	132.042	37.2924	0.672492		0.0821965	EET	0.809235
H2geo	H_contig_172	2838	3119	+	94	K02965	RP-S19, rpsS; small subunit ribosomal protein S19		128.725	90.6406	41.0423	9.80927	177.051	36.7404	0.704139		0.076203	EET	1.37542
H2geo	H_contig_172	3139	3474	+	112	K02890	RP-L22, MRPL22, rplV; large subunit ribosomal protein L22		225.078	152.147	55.6438	20.5819	175.614	35.1336	0.675973		0.0914436	EET	0.780238
H2geo	H_contig_172	3505	4140	+	212	K02982	RP-S3, rpsC; small subunit ribosomal protein S3		253.276	144.013	83.9907	17.3976	253.354	39.0565	0.5686		0.06869	EET	1.0003
H2geo	H_contig_172	4206	4580	+	125	K02878	RP-L16, MRPL16, rplP; large subunit ribosomal protein L16		248.054	156.204	92.5913	11.0649	284.441	35.9412	0.629718		0.0446066	EET	1.14669
H2geo	H_contig_172	4570	4758	+	63	K02904	RP-L29, rpmC; large subunit ribosomal protein L29		128.044	107.066	61.2377	14.6361	228.149	29.1038	0.836165		0.114305	EET	1.78179
H2geo	H_contig_172	4769	5026	+	86	K02961	RP-S17, MRPS17, rpsQ; small subunit ribosomal protein S17		181.737	144.48	34.5078	26.8044	131.946	39.0523	0.794995		0.14749	EET	0.726028
H2geo	H_contig_172	5041	5409	+	123	K02874	RP-L14, MRPL14, rplN; large subunit ribosomal protein L14		122.969	69.27	60.3185	7.49651	123.007	39.3876	0.563311		0.0609624	EET	1.0003
H2geo	H_contig_172	5429	5755	+	109	K02895	RP-L24, MRPL24, rplX; large subunit ribosomal protein L24		175.767	74.9102	59.8979	8.45937	166.567	39.7056	0.426189		0.0481282	EET	0.947657
H2geo	H_contig_172	5769	6308	+	180	K02931	RP-L5, MRPL5, rplE; large subunit ribosomal protein L5		183.464	104.53	36.2715	12.8065	138.69	42.0312	0.569761		0.0698043	EET	0.755956
H2geo	H_contig_172	6548	6946	+	133	K02994	RP-S8, rpsH; small subunit ribosomal protein S8		155.422	114.777	53.552	6.93287	153.574	36.2117	0.738487		0.0446066	EET	0.988106
H2geo	H_contig_172	6974	7513	+	180	K02933	RP-L6, MRPL6, rplF; large subunit ribosomal protein L6		179.262	124.253	44.5151	12.8065	96.6629	41.2096	0.693137		0.0714403	EET	0.539227
H2geo	H_contig_172	7534	7902	+	123	K02881	RP-L18, MRPL18, rplR; large subunit ribosomal protein L18		151.662	89.4738	41.0166	11.2448	147.608	37.8168	0.589954		0.0741435	EET	0.973269
H2geo	H_contig_172	7926	8414	+	163	K02988	RP-S5, MRPS5, rpsE; small subunit ribosomal protein S5		123.724	80.5849	43.6958	8.48532	134.591	37.8721	0.651328		0.0685827	EET	1.08783
H2geo	H_contig_172	8646	9086	+	147	K02876	RP-L15, MRPL15, rplO; large subunit ribosomal protein L15		162.914	74.8658	38.3577	12.5452	72.0469	36.2853	0.459543		0.0770052	EET	0.44224
H2geo	H_contig_172	9089	10396	+	436	K03076	secY; preprotein translocase subunit SecY		92.5091	74.9102	25.865	7.40195	64.1978	40.4486	0.80976		0.0800132	EET	0.693961
H2geo	H_contig_172	10413	11066	+	218	K00939	E2.7.4.3, adk; adenylate kinase [EC:2.7.4.3]		92.5091	56.9969	23.1424	4.22968	97.1642	38.3383	0.616121		0.0457218	EET	1.05032
H2geo	H_contig_172	11990	12358	+	123	K02952	RP-S13, rpsM; small subunit ribosomal protein S13		133.217	121.223	41.0166	14.993	172.21	36.9124	0.909964		0.112546	EET	1.2927
H2geo	H_contig_172	12380	12775	+	132	K02948	RP-S11, MRPS11, rpsK; small subunit ribosomal protein S11		169.968	121.026	47.2129	10.4781	212.047	37.9619	0.71205		0.0616474	EET	1.24757
H2geo	H_contig_172	12856	13434	+	193	K02986	RP-S4, rpsD; small subunit ribosomal protein S4		190.698	147.154	53.8179	11.9439	195.983	41.3012	0.771659		0.0626326	EET	1.02771
H2geo	H_contig_172	13465	14487	+	341	K03040	rpoA; DNA-directed RNA polymerase subunit alpha [EC:2.7.7.6]		122.717	102.026	16.5354	8.11206	128.67	41.5768	0.831393		0.0661038	EET	1.04851
H2geo	H_contig_172	14591	15067	+	159	K02879	RP-L17, MRPL17, rplQ; large subunit ribosomal protein L17		125.251	109.405	48.528	8.69879	199.828	36.1757	0.873489		0.0694509	EET	1.59542
H2geo	H_contig_172	43935	45056	+	374	K06282	E1.12.99.6S; hydrogenase small subunit [EC:1.12.99.6]		142.22	60.7502	28.5658	2.46543	2.02271	36.9888	0.427155		0.0173353	EET	0.0142223	Suc
H2geo	H_contig_172	45040	45957	+	306	K00124	E1.2.1.2B1; formate dehydrogenase, beta subunit		157.349	48.7267	31.0345	4.51996	7.41659	37.393	0.309674		0.0287257	EET	0.0471348	Suc
H2geo	H_contig_172	45957	47276	+	440	K00185	K00185; prokaryotic molybdopterin-containing oxidoreductase family, membrane subunit		101.408	30.6599	23.6065	1.04781	1.7193	34.9591	0.302342		0.0103326	EET	0.0169543	Suc
H2geo	H_contig_172	47345	49027	+	561	K06281	E1.12.99.6L; hydrogenase large subunit [EC:1.12.99.6]		235.012	86.6956	55.0156	4.93086	1.34847	35.2261	0.368899		0.0209813	EET	0.00573789	Suc
H2geo	H_contig_172	49197	49688	+	164	K03605	hyaD; hydrogenase 1 maturation protease [EC:3.4.24.-]		115.284	49.7878	43.4293	5.62239	0	34.6573	0.431872		0.0487699	EET	ZERO	Suc
H2geo	H_contig_172	49741	49917	+	59	K03116	tatA; sec-independent protein translocase protein TatA		123.907	78.2223	80.4792	0	25.6438	31.6531	0.631297		ZERO	EET	0.20696
H2geo	H_contig_172	49987	51135	-	383	K03313	nhaA; Na+:H+ antiporter, NhaA family		71.0847	42.6382	28.6694	4.81499	11.8511	37.577	0.599822		0.067736	EET	0.166717	Suc
H2geo	H_contig_172	68344	69177	+	278	K00241	sdhC; succinate dehydrogenase cytochrome b556 subunit		73.4499	43.4184	27.7552	28.1928	726.559	38.0442	0.591129		0.383837		9.8919	AcPro
H2geo	H_contig_172	69188	71104	+	639	K00239	sdhA; succinate dehydrogenase flavoprotein subunit [EC:1.3.99.1]		45.7623	43.89	25.0789	49.0617	532.741	39.8065	0.959086		1.0721		11.6415	AcPro
H2geo	H_contig_172	71104	71862	+	253	K00240	sdhB; succinate dehydrogenase iron-sulfur subunit [EC:1.3.99.1]		43.8413	35.0799	25.8058	76.5356	511.305	36.4593	0.800158		1.74574		11.6626	AcPro
H2geo	H_contig_172	88156	88467	+	104				70.2936	61.4439	17.1212	4.43303	50.9178	34.8789	0.874103		0.0630646	EET	0.724359
H2geo	H_contig_172	123758	125101	+	448			omcS (6)	3.37617	4.75458	13.2485	5.14549	155.351	37.6276	1.40828		1.52406		46.014	AcPro
H2geo	H_contig_172	138006	138404	+	133				5.68618	10.677	13.388	10.3993	51.1912	37.4758	1.8777		1.82887		9.00274	AcPro
H2geo	H_contig_181	82847	84175	+	443	K07792	dcuB; anaerobic C4-dicarboxylate transporter DcuB		99.014	84.1443	122.592	292.44	18.7842	37.3802	0.849823		2.95352		0.189713	Suc
H2geo	H_contig_181	148461	149573	-	371	K03686	dnaJ; molecular chaperone DnaJ		10.8717	9.56898	11.9987	0	120.305	37.0343	0.880174		ZERO		11.0659	AcPro
H2geo	H_contig_181	149660	151456	-	599	K04043	dnaK; molecular chaperone DnaK		28.1968	42.6722	45.5803	16.1632	310.68	38.3552	1.51337		0.573229		11.0183	AcPro
H2geo	H_contig_181	151728	152318	-	197	K03687	GRPE; molecular chaperone GrpE		11.5167	28.8332	28.6222	11.7014	111.362	34.4729	2.5036		1.01604		9.66961	AcPro
H2geo	H_contig_181	152366	153397	-	344	K03705	hrcA; heat-inducible transcriptional repressor		10.2594	10.32	5.17617	0	59.3759	37.8762	1.00591		ZERO		5.78748	AcPro
H2geo	H_contig_181	159280	159819	+	180	K03640	pal; peptidoglycan-associated lipoprotein		91.0316	130.17	52.7586	15.3679	260.57	38.0143	1.42994		0.168819	EET	2.86241
H2geo	H_contig_181	187456	188379	+	308	K03769	ppiC; peptidyl-prolyl cis-trans isomerase C [EC:5.2.1.8]		68.7511	49.5629	27.9424	8.98121	127.72	37.7548	0.720904		0.130634	EET	1.85771
H2geo	H_contig_181	223876	224292	-	139	K02114	ATPF1E, atpC; F-type H+-transporting ATPase subunit epsilon [EC:3.6.3.14]		103.374	53.6345	46.9703	3.3168	70.7511	39.3754	0.518839		0.0320855	EET	0.684419
H2geo	H_contig_181	224368	225780	-	471	K02112	ATPF1B, atpD; F-type H+-transporting ATPase subunit beta [EC:3.6.3.14]		110.255	78.3884	83.8005	9.78844	157.402	39.5153	0.710975		0.0887802	EET	1.42762
H2geo	H_contig_181	225837	226700	-	288	K02115	ATPF1G, atpG; F-type H+-transporting ATPase subunit gamma [EC:3.6.3.14]		94.5328	59.1682	55.6438	16.0082	107.695	40.2593	0.625901		0.16934	EET	1.13924
H2geo	H_contig_181	226720	228231	-	504	K02111	ATPF1A, atpA; F-type H+-transporting ATPase subunit alpha [EC:3.6.3.14]		104.536	78.1865	55.3494	12.8065	147.096	38.3505	0.747937		0.122508	EET	1.40713
H2geo	H_contig_181	228241	228783	-	181	K02113	ATPF1D, atpH; F-type H+-transporting ATPase subunit delta [EC:3.6.3.14]		72.4229	37.2661	27.8732	7.64147	96.1289	34.631	0.514563		0.105512	EET	1.32733
H2geo	H_contig_181	228780	229400	-	207	K02109	ATPF0B, atpF; F-type H+-transporting ATPase subunit b [EC:3.6.3.14]		68.1976	48.0205	21.5049	6.68168	105.982	35.6373	0.704139		0.0979753	EET	1.55404
H2geo	H_contig_181	229402	229812	-	137	K02109	ATPF0B, atpF; F-type H+-transporting ATPase subunit b [EC:3.6.3.14]		66.2419	59.6001	4.33237	0	82.8277	37.0634	0.899733		ZERO	EET	1.25038
H2geo	H_contig_181	235537	236379	-	281	K11912	ppkA; serine/threonine-protein kinase PpkA [EC:2.7.11.1]		8.07397	6.31689	19.01	0	51.1507	37.0817	0.782376		ZERO		6.33526	AcPro
H2geo	H_contig_181	239537	239836	+	100	K04078	groES, HSPE1; chaperonin GroES		27.7296	67.4517	38.5797	13.8311	612.759	36.1516	2.43248		0.498783		22.0976	AcPro
H2geo	H_contig_181	239931	241580	+	550	K04077	groEL, HSPD1; chaperonin GroEL		46.2924	73.5837	86.3322	14.2502	727.608	39.1441	1.58954		0.30783		15.7177	AcPro
H2geo	H_contig_181	244706	245653	-	316	K00125	E1.2.1.2B2; formate dehydrogenase, beta subunit [EC:1.2.1.2]		8.77519	4.49378	8.45223	16.0487	62.2431	37.0966	0.512101		1.82887		7.09307	AcPro
H2geo	H_contig_181	310030	311355	-	442	K11103	dctA; aerobic C4-dicarboxylate transport protein		50.1893	61.8455	22.1568	5.21534	184.844	37.5715	1.23224		0.103913	EET	3.68294
H2geo	H_contig_181	326901	327575	+	225	K07665	cusR, copR, silR; two-component system, OmpR family, copper resistance phosphate regulon response regulator CusR		22.4078	33.1342	15.8276	4.09809	114.314	38.7767	1.47869		0.182887		5.10155	AcPro
H2geo	H_contig_181	332873	333133	-	87	K02110	ATPF0C, atpE; F-type H+-transporting ATPase subunit c [EC:3.6.3.14]		199.931	216.27	102.333	31.7956	278.25	31.7516	1.08172		0.159032	EET	1.39173
H2geo	H_contig_181	333203	333895	-	231	K02108	ATPF0A, atpB; F-type H+-transporting ATPase subunit a [EC:3.6.3.14]		57.8382	35.3472	8.99294	3.99165	39.2983	36.1665	0.611139		0.0690141	EET	0.679452
H2geo	H_contig_181	336584	337099	+	172	K00331	nuoB; NADH-quinone oxidoreductase subunit B [EC:1.6.5.3]		83.5406	66.0482	34.5078	8.04132	272.689	37.8432	0.790612		0.0962564	EET	3.26415
H2geo	H_contig_181	337133	337618	+	162	K00332	nuoC; NADH-quinone oxidoreductase subunit C [EC:1.6.5.3]		73.1365	46.0197	38.4698	0	308.201	40.5645	0.62923		ZERO	EET	4.21405
H2geo	H_contig_181	337696	338838	+	381	K00333	nuoD; NADH-quinone oxidoreductase subunit D [EC:1.6.5.3]		105.202	74.5426	43.6193	14.5208	268.049	38.2667	0.708567		0.138028	EET	2.54795
H2geo	H_contig_181	338856	339374	+	173	K00334	nuoE; NADH-quinone oxidoreductase subunit E [EC:1.6.5.3]		103.458	112.864	77.1938	13.3247	183.657	38.1833	1.09092		0.128794	EET	1.77519
H2geo	H_contig_181	339407	341188	+	594	K00335	nuoF; NADH-quinone oxidoreductase subunit F [EC:1.6.5.3]		87.4242	57.9729	67.9467	14.7469	243.249	39.1994	0.663121		0.168682	EET	2.7824
H2geo	H_contig_181	343790	344827	+	346	K00337	nuoH; NADH-quinone oxidoreductase subunit H [EC:1.6.5.3]		72.8576	71.8226	60.8973	9.32731	220.826	38.4626	0.985794		0.128021	EET	3.03092
H2geo	H_contig_181	344851	345249	+	133	K00338	nuoI; NADH-quinone oxidoreductase subunit I [EC:1.6.5.3]		102.351	112.108	75.8653	13.8657	221.829	40.2962	1.09533		0.135472	EET	2.16733
H2geo	H_contig_21	11758	12138	-	127	K05919	E1.15.1.2; superoxide reductase [EC:1.15.1.2]		57.5633	30.7488	37.388	3.6302	47.6531	37.9976	0.534174		0.0630646	EET	0.827838
H2geo	H_contig_21	12219	12956	-	246				89.1529	51.9525	41.0166	9.37064	3.07517	37.0752	0.582736		0.105108	EET	0.0344933	Suc
H2geo	H_contig_21	13275	13538	+	88			ppcJ (3)	329.432	141.197	337.235	136.215	8.59651	33.7699	0.428606		0.413484		0.0260949	Suc
H2geo	H_contig_21	13646	13798	-	51				163.115	118.336	192.026	45.1996	14.8332	29.8221	0.725476		0.277102		0.0909368	Suc
H2geo	H_contig_21	26225	26533	+	103	K08906	petJ; cytochrome c6	petJ (1)	17.1322	20.6801	31.6936	35.8086	95.4796	36.5766	1.2071		2.09014		5.57313	AcPro
H2geo	H_contig_21	40095	40454	+	120			ppcA (3)	35.7124	85.7938	27.2037	15.3679	182.819	39.3452	2.40236		0.430323		5.11921	AcPro
H2geo	H_contig_21	65630	67702	-	691	K15987	hppA; K(+)-stimulated pyrophosphate-energized sodium pump [EC:3.6.1.1]		58.7353	29.7982	17.179	2.0016	68.9711	37.5189	0.50733		0.0340784	EET	1.17427
H2geo	H_contig_21	80489	81913	+	475				79.0758	85.2022	93.7159	183.444	571.749	38.9439	1.07747		2.31984		7.23039	AcPro
H2geo	H_contig_21	110266	110727	+	154	K03642	rlpA; rare lipoprotein A		104.764	55.3261	48.1765	0	68.7721	36.048	0.528104		ZERO	EET	0.65645
H2geo	H_contig_21	133785	134042	-	86	K02899	RP-L27, MRPL27, rpmA; large subunit ribosomal protein L27		114.319	70.1762	44.8601	21.4435	114.354	37.9735	0.613865		0.187577	EET	1.0003
H2geo	H_contig_21	134073	134381	-	103	K02888	RP-L21, MRPL21, rplU; large subunit ribosomal protein L21		208.033	137.868	72.0309	13.4282	279.094	40.0501	0.662719		0.0645484	EET	1.34159
H2geo	H_contig_21	140575	140811	+	79				306.334	727.993	123.966	11.6718	3935.68	36.4725	2.37647		0.0381015	EET	12.8477	AcPro
H2geo	H_contig_21	152673	152912	-	80				18.9066	35.5009	18.5479	0	141.842	29.9225	1.8777		ZERO		7.50229	AcPro
H2geo	H_contig_21	195325	195564	+	80				179.612	372.759	100.159	5.76295	1588.63	35.1858	2.07536		0.0320855	EET	8.8448	AcPro
H2geo	H_contig_21	203657	203866	+	70				0	10.1431	33.9162	0	86.4563	30.6736	∞		∞		∞	AcPro
H2geo	H_contig_21	252580	254436	-	619	K04013	nrfB; cytochrome c-type protein NrfB	cbcL (9)	54.1642	29.8231	12.9446	5.95846	69.6609	37.1215	0.550605		0.110007	EET	1.28611
H2geo	H_contig_21	284574	284771	+	66	K02909	RP-L31, rpmE; large subunit ribosomal protein L31	na (1)	91.6681	69.926	13.4894	6.98539	206.316	33.5958	0.762817		0.076203	EET	2.25069
H2geo	H_contig_21	296041	296238	+	66	K02970	RP-S21, MRPS21, rpsU; small subunit ribosomal protein S21		118.405	96.8206	53.9577	0	194.854	34.5226	0.81771		ZERO	EET	1.64566
H2geo	H_contig_21	296250	296699	+	150	K09117	K09117; hypothetical protein		157.975	106.503	47.4827	21.515	307.64	39.8455	0.674175		0.136193	EET	1.9474
H2geo	H_contig_21	296800	297303	+	168	K03558	cvpA; membrane protein required for colicin V production		51.0177	35.9235	17.6647	0	67.544	35.5075	0.704139		ZERO	EET	1.32393
H2geo	H_contig_21	324977	326134	+	386	K03531	ftsZ; cell division protein FtsZ		18.2861	36.7885	36.1349	27.471	141.107	33.7686	2.01183		1.50229		7.71664	AcPro
H2geo	H_contig_21	342501	342722	+	74	K13819	K13819; NifU-like protein		10.2198	0	16.0415	6.23021	122.674	28.6161	ZERO		0.609624		12.0037	AcPro
H2geo	H_contig_21	355618	356118	-	167				12.076	8.50321	3.5541	5.52138	90.5979	35.9385	0.704139		0.457218		7.50229	AcPro
H2geo	H_contig_21	371090	372685	-	532	K01067	E3.1.2.1, ACH1; acetyl-CoA hydrolase [EC:3.1.2.1]		24.1663	12.6789	3.347	66.7288	271.598	39.6974	0.524652		2.76124		11.2387	AcPro
H2geo	H_contig_21	403847	404548	+	234	K02488	pleD; two-component system, cell cycle response regulator		8.61837	18.2056	15.2188	23.6429	51.726	36.5481	2.11242		2.74331		6.00183	AcPro
H2geo	H_contig_21	449960	450403	+	148	K13993	HSP20; HSP20 family protein		10.2198	23.9871	12.0311	12.4604	194.235	37.7607	2.34713		1.21925		19.0058	AcPro
H2geo	H_contig_21	468922	469122	-	67	K03704	cspA; cold shock protein (beta-ribbon, CspA family)		75.25	90.0769	0	0	146.782	38.4338	1.19704		ZERO	EET	1.95059
H2geo	H_contig_224	8301	8777	+	159	K03711	fur; Fur family transcriptional regulator, ferric uptake regulator		55.4909	2.23276	0	0	0	34.0335	0.0402365	SP	ZERO	EET	ZERO	Suc
H2geo	H_contig_224	8970	10961	+	664	K04759	feoB; ferrous iron transport protein B		105.163	12.297	4.02245	6.94331	15.9501	37.1979	0.116933	SP	0.0660243	EET	0.151671	Suc
H2geo	H_contig_224	11358	12002	+	215	K03709	troR; DtxR family transcriptional regulator, Mn-dependent transcriptional regulator		85.5925	13.2096	6.90156	6.43306	14.0743	36.6724	0.154332	SP	0.0751591	EET	0.164434	Suc
H2geo	H_contig_266	4034	4471	-	146	K02996	RP-S9, MRPS9, rpsI; small subunit ribosomal protein S9		126.044	72.9471	10.1633	0	155.444	34.0267	0.578744		ZERO	EET	1.23325
H2geo	H_contig_266	4461	4889	-	143	K02871	RP-L13, MRPL13, rplM; large subunit ribosomal protein L13		139.265	91.8555	18.6776	0	158.705	38.1733	0.659573		ZERO	EET	1.13959
H2geo	H_contig_266	25244	27226	-	661	K14393	actP; cation/acetate symporter		7.62745	3.75955	2.24483	24.4119	58.3678	36.3888	0.492897		3.20053		7.65233	AcPro
H2geo	H_contig_285	13652	14032	+	127				218.343	268.353	100.48	29.0416	816.059	34.2741	1.22904		0.133009	EET	3.7375
H2geo	H_contig_317	65796	66278	-	161	K03605	hyaD; hydrogenase 1 maturation protease [EC:3.4.24.-]		7.8288	15.4352	7.3731	34.3629	61.0833	33.3045	1.97159		4.38929		7.80238	AcPro
H2geo	H_contig_317	70148	72016	-	623	K01596	E4.1.1.32, pckA, PEPCK; phosphoenolpyruvate carboxykinase (GTP) [EC:4.1.1.32]		72.8342	45.0172	22.3885	2.9601	161.498	39.8207	0.618077		0.0406416	EET	2.21734
H2geo	H_contig_318	8930	9160	-	77	K06960	K06960		101.49	64.5471	50.1035	17.9624	157.193	33.7453	0.635996		0.176988	EET	1.54886
H2geo	H_contig_318	9212	9478	-	89	K02959	RP-S16, MRPS16, rpsP; small subunit ribosomal protein S16		127.46	83.7662	36.6791	5.18018	178.498	37.1502	0.657196		0.0406416	EET	1.40043
H2geo	H_contig_67	32355	33704	-	450	K00262	E1.4.1.4, gdhA; glutamate dehydrogenase (NADP+) [EC:1.4.1.4]		98.034	76.5242	18.4655	2.04905	178.196	35.9691	0.780588		0.0209014	EET	1.8177
H2geo	H_contig_67	73717	74265	-	183	K00177	korG; 2-oxoglutarate ferredoxin oxidoreductase subunit gamma [EC:1.2.7.3]		290.658	201.754	111.896	42.8284	558.068	36.7147	0.694127		0.14735	EET	1.92002
H2geo	H_contig_67	75110	76243	-	378	K00174	korA; 2-oxoglutarate ferredoxin oxidoreductase subunit alpha [EC:1.2.7.3]		238.083	201.923	82.4353	20.7344	584.381	37.8599	0.848122		0.0870892	EET	2.45453
H2geo	H_contig_67	76266	76460	-	65	K00176	korD; 2-oxoglutarate ferredoxin oxidoreductase subunit delta [EC:1.2.7.3]	na (1)	155.131	120.157	45.6565	7.09286	360.789	29.7139	0.774553		0.0457218	EET	2.32571
H2geo	H_contig_67	105485	106363	+	293	K02279	cpaB, rcpC; pilus assembly protein CpaB		73.1311	41.1956	18.2314	11.0145	46.4739	34.7724	0.563311		0.150613	EET	0.635488
H2geo	H_contig_67	106462	107700	+	413	K02280	cpaC, rcpA; pilus assembly protein CpaC		50.6616	21.4896	10.0599	5.58155	31.1389	33.8513	0.42418		0.110173	EET	0.614645
H2geo	H_contig_67	142282	142713	+	144				1.75061	17.2574	4.12177	9.60491	52.5342	37.3619	9.85794		5.48662		30.0091	AcPro
H2geo	H_contig_67	236629	236979	-	117				10.773	30.3426	10.1459	11.8214	77.589	34.7697	2.81656		1.09732		7.20219	AcPro
H2geo	H_contig_67	295113	296675	-	521	K01067	E3.1.2.1, ACH1; acetyl-CoA hydrolase [EC:3.1.2.1]		155.317	134.917	63.2268	10.6189	363	34.5979	0.868657		0.0683691	EET	2.33716
H2geo	H_contig_67	384628	384819	+	64	K02902	RP-L28, MRPL28, rpmB; large subunit ribosomal protein L28		51.2052	49.9231	9.27397	0	35.4606	24.7932	0.974961		ZERO	EET	0.692519
H2geo	H_contig_79	8169	8393	+	75	K03666	hfq; host factor-I protein		10.0835	9.46691	0	0	60.5194	32.6481	0.938852		ZERO		6.00183	AcPro
H2geo	H_contig_79	50931	51647	+	239	K01990	ABC-2.A; ABC-2 type transport system ATP-binding protein		64.3403	126.258	78.2273	1.92902	79.131	37.1441	1.96235		0.0299815	EET	1.22988
H2geo	H_contig_79	55682	56029	+	116	K02520	infC, MTIF3; translation initiation factor IF-3		80.4072	58.148	48.6084	0	84.7793	35.7801	0.72317		ZERO	EET	1.05438
H2geo	H_contig_79	56055	56252	+	66	K02916	RP-L35, MRPL35, rpmI; large subunit ribosomal protein L35		122.224	91.4417	4.49647	0	229.24	34.6251	0.748147		ZERO	EET	1.87557
H2geo	H_contig_79	56389	56742	+	118	K02887	RP-L20, MRPL20, rplT; large subunit ribosomal protein L20		205.088	126.359	25.1498	15.6283	275.671	36.5316	0.616121		0.076203	EET	1.34416
H2geo	H_contig_878	2	1201	+	400	K02358	tuf, TUFM; elongation factor Tu		419.095	268.919	193.641	46.1036	533.327	68.3209	0.641666		0.110007	EET	1.27257
H2geo	H_contig_98	34601	34975	-	125	K02437	gcvH, GCSH; glycine cleavage system H protein		10.0835	5.68014	0	3.68829	66.5713	33.5755	0.563311		0.365774		6.60201	AcPro
H2geo	H_contig_98	108212	108397	-	62				85.3844	80.1633	4.78657	0	36.6045	34.5671	0.938852		ZERO	EET	0.428702
H2geo	H_contig_98	116684	117817	+	378	K03856	AROA2, aroA; 3-deoxy-7-phosphoheptulonate synthase [EC:2.5.1.54]		144.05	172.809	91.8565	3.65901	146.095	35.7516	1.19964		0.025401	EET	1.0142
H2geo	H_contig_98	117897	118388	+	164				162.935	201.316	108.573	5.62239	198.349	36.0417	1.23556		0.034507	EET	1.21735
H3lac	H_contig_1000	2	886	-	295	K12997	rgpB; rhamnosyltransferase [EC:2.4.1.-]		101.748	39.6413	5.401	98.4291	0	38.4384	0.389603		0.967383		ZERO	Suc
H3lac	H_contig_1000	876	2018	-	381	K12996	rgpA; rhamnosyltransferase [EC:2.4.1.-]		80.2962	46.04	3.3455	94.2956	0	37.4142	0.573378		1.17435		ZERO	Suc
H3lac	H_contig_1000	2261	3115	-	285	K00067	rfbD; dTDP-4-dehydrorhamnose reductase [EC:1.1.1.133]		230.889	121.89	21.244	245.209	5.71949	39.3405	0.527914		1.06202		0.0247716	Suc
H3lac	H_contig_1000	3112	4161	-	350	K01710	E4.2.1.46, rfbB, rffG; dTDP-glucose 4,6-dehydratase [EC:4.2.1.46]		227.591	140.527	20.03	322.004	1.55243	37.5336	0.617453		1.41484		0.00682115	Suc
H3lac	H_contig_1000	4270	4863	-	198	K01790	rfbC; dTDP-4-dehydrorhamnose 3,5-epimerase [EC:5.1.3.13]		189.493	107.7	9.65634	260.986	2.7442	39.8449	0.568362		1.37729		0.0144818	Suc
H3lac	H_contig_1000	4867	5739	-	291	K00973	E2.7.7.24, rfbA, rffH; glucose-1-phosphate thymidylyltransferase [EC:2.7.7.24]		148.769	94.5557	9.85544	211.403	3.73437	39.5998	0.635588		1.42101		0.0251018	Suc
H3lac	H_contig_1000	5959	7689	-	577	K06286	ezrA; septation ring formation regulator		155.06	78.6844	9.94084	163.764	0.941683	42.5429	0.507445		1.05613		0.00607303	Suc
H3lac	H_contig_1000	7949	8986	-	346	K02357	tsf, TSFM; elongation factor Ts		488.805	200.801	35.9182	558.998	7.8519	39.5737	0.4108		1.1436		0.0160635	Suc
H3lac	H_contig_1000	9280	10056	-	259	K02967	RP-S2, MRPS2, rpsB; small subunit ribosomal protein S2		870.292	293.483	39.371	1048.9	31.4682	38.872	0.337224		1.20522		0.0361582	Suc
H3lac	H_contig_1000	14147	16747	-	867	K04072	adhE; acetaldehyde dehydrogenase / alcohol dehydrogenase [EC:1.2.1.10 1.1.1.1]		887.473	788.656	479.275	1224.97	127.847	42.1051	0.888654		1.38029		0.144058	Suc
H3lac	H_contig_1000	17152	18213	-	354	K07177	K07177; PDZ domain-containing protein		54.6242	35.9492	27.005	68.1218	7.67445	40.024	0.658118		1.2471		0.140495	Suc
H3lac	H_contig_1010	256	1524	-	423	K01754	E4.3.1.19, ilvA, tdcB; threonine dehydratase [EC:4.3.1.19]		225.84	237.429	3.01333	301.337	2.56904	39.9706	1.05131		1.33429		0.0113755	Suc
H3lac	H_contig_1010	1615	2685	-	357	K00053	ilvC; ketol-acid reductoisomerase [EC:1.1.1.86]		1675.89	1552.09	254.392	2382.15	112.627	40.3821	0.926132		1.42143		0.0672046	Suc
H3lac	H_contig_1010	2810	3277	-	156	K01653	E2.2.1.6S, ilvH, ilvN; acetolactate synthase I/III small subunit [EC:2.2.1.6]		357.064	328.513	16.3415	580.479	10.4491	36.0216	0.920038		1.6257		0.0292638	Suc
H3lac	H_contig_1010	3279	5009	-	577	K01652	E2.2.1.6L, ilvB, ilvG, ilvI; acetolactate synthase I/II/III large subunit [EC:2.2.1.6]		417.662	293.874	10.4931	543.322	7.53347	40.8797	0.703618		1.30087		0.0180373	Suc
H3lac	H_contig_1010	5274	6986	-	571	K01687	ilvD; dihydroxy-acid dehydratase [EC:4.2.1.9]		408.909	315.635	8.37108	555.064	5.70947	35.8373	0.771897		1.35743		0.0139627	Suc
H3lac	H_contig_1010	10211	10591	-	127	K02879	RP-L17, MRPL17, rplQ; large subunit ribosomal protein L17		1165.81	463.109	80.2921	1410.56	8.55671	35.9959	0.397242		1.20994		0.00733972	Suc
H3lac	H_contig_1010	10615	11550	-	312	K03040	rpoA; DNA-directed RNA polymerase subunit alpha [EC:2.7.7.6]		1493.01	591.984	85.7929	1892.87	13.9321	40.4594	0.396504		1.26782		0.00933154	Suc
H3lac	H_contig_1010	11603	11986	-	128	K02948	RP-S11, MRPS11, rpsK; small subunit ribosomal protein S11		1145.43	502.484	67.2172	1511.04	8.48986	34.5123	0.438687		1.31919		0.00741196	Suc
H3lac	H_contig_1010	12002	12367	-	122	K02952	RP-S13, rpsM; small subunit ribosomal protein S13		1767.16	837.312	112.314	2275.16	31.1759	35.6605	0.473819		1.28747		0.0176419	Suc
H3lac	H_contig_1010	12530	12748	-	73	K02518	infA; translation initiation factor IF-1		1391.66	692.604	104.765	1833.75	7.44317	33.0614	0.497681		1.31767		0.0053484	Suc
H3lac	H_contig_1010	12885	13532	-	216	K00939	E2.7.4.3, adk; adenylate kinase [EC:2.7.4.3]		193.744	81.2095	33.9313	236.959	20.1241	38.6194	0.419159		1.22305		0.10387	Suc
H3lac	H_contig_1010	13653	14963	-	437	K03076	secY; preprotein translocase subunit SecY		622.133	335.289	88.9621	800.722	9.94693	39.201	0.538934		1.28706		0.0159884	Suc
H3lac	H_contig_1010	15122	15571	-	150	K02876	RP-L15, MRPL15, rplO; large subunit ribosomal protein L15		1131.36	463.181	165.703	1364.88	14.4894	32.4665	0.409403		1.20641		0.0128071	Suc
H3lac	H_contig_1010	15692	15871	-	60	K02907	RP-L30, MRPL30, rpmD; large subunit ribosomal protein L30		1467.11	550.314	116.842	1894.76	45.2793	37.5894	0.375101		1.29149		0.0308629	Suc
H3lac	H_contig_1010	15882	16376	-	165	K02988	RP-S5, MRPS5, rpsE; small subunit ribosomal protein S5		1595.24	660.794	162.227	1816.46	23.0513	35.8572	0.41423		1.13868		0.0144501	Suc
H3lac	H_contig_1010	16397	16744	-	116	K02881	RP-L18, MRPL18, rplR; large subunit ribosomal protein L18		1042.49	409.177	134.606	1357.64	23.4203	37.0244	0.392502		1.30231		0.0224658	Suc
H3lac	H_contig_1010	16946	17482	-	179	K02933	RP-L6, MRPL6, rplF; large subunit ribosomal protein L6		1338.26	595.661	122.835	1476.44	9.10645	38.185	0.445103		1.10325		0.00680472	Suc
H3lac	H_contig_1010	17603	18001	-	133	K02994	RP-S8, rpsH; small subunit ribosomal protein S8		1030.76	465.491	119.797	1272.92	8.1707	38.6339	0.451602		1.23494		0.0079269	Suc
H3lac	H_contig_1010	18156	18464	+	103				1283.34	544.303	154.689	1653.23	21.101	34.2825	0.42413		1.28822		0.0164423	Suc
H3lac	H_contig_1010	18457	18999	-	181	K02931	RP-L5, MRPL5, rplE; large subunit ribosomal protein L5		1117.77	465.563	96.8302	1506.35	18.0116	39.1821	0.416509		1.34763		0.0161139	Suc
H3lac	H_contig_1010	19022	19327	-	102	K02895	RP-L24, MRPL24, rplX; large subunit ribosomal protein L24		1148.79	654.172	118.716	1611.54	10.6539	36.9065	0.569446		1.40281		0.00927408	Suc
H3lac	H_contig_1010	19595	19963	-	123	K02874	RP-L14, MRPL14, rplN; large subunit ribosomal protein L14		1140.37	536.892	126.946	1436.42	30.9224	35.4734	0.470806		1.25962		0.0271162	Suc
H3lac	H_contig_1010	19987	20247	-	87	K02961	RP-S17, MRPS17, rpsQ; small subunit ribosomal protein S17		1456.33	628.591	98.8943	1770.59	6.24542	37.4164	0.431628		1.21579		0.00428847	Suc
H3lac	H_contig_1010	20270	20476	-	69	K02904	RP-L29, rpmC; large subunit ribosomal protein L29		1225.55	667.954	83.1285	1683.28	23.624	37.3139	0.545022		1.37349		0.0192762	Suc
H3lac	H_contig_1010	20466	20894	-	143	K02878	RP-L16, MRPL16, rplP; large subunit ribosomal protein L16		1862.86	829.8	118.104	2347.16	15.1986	37.5367	0.445445		1.25998		0.00815878	Suc
H3lac	H_contig_1010	20894	21547	-	218	K02982	RP-S3, rpsC; small subunit ribosomal protein S3		1428.5	593.228	89.1661	1894.08	12.4622	36.8477	0.415282		1.32593		0.00872399	Suc
H3lac	H_contig_1010	21560	21904	-	115	K02890	RP-L22, MRPL22, rplV; large subunit ribosomal protein L22		1658.89	747.709	80.3576	1925.79	33.0736	38.526	0.450729		1.16089		0.0199372	Suc
H3lac	H_contig_1010	21924	22202	-	93	K02965	RP-S19, rpsS; small subunit ribosomal protein S19		1641.67	702.686	126.778	2095.59	17.5275	34.5808	0.42803		1.2765		0.0106766	Suc
H3lac	H_contig_1010	22303	23136	-	278	K02886	RP-L2, MRPL2, rplB; large subunit ribosomal protein L2		772.4	358.793	46.9965	1115.29	13.6815	37.6057	0.464517		1.44393		0.017713	Suc
H3lac	H_contig_1010	23151	23438	-	96	K02892	RP-L23, MRPL23, rplW; large subunit ribosomal protein L23		1370.91	652.065	56.4292	1804.53	16.9797	37.8466	0.475645		1.31631		0.0123858	Suc
H3lac	H_contig_1010	23438	24064	-	209	K02926	RP-L4, MRPL4, rplD; large subunit ribosomal protein L4		1101.97	485.474	54.8887	1436.41	7.7993	39.0799	0.440551		1.30349		0.00707759	Suc
H3lac	H_contig_1010	24088	24711	-	208	K02906	RP-L3, MRPL3, rplC; large subunit ribosomal protein L3		1314.02	525.841	45.9605	1639.7	13.0613	39.5015	0.400179		1.24785		0.00994001	Suc
H3lac	H_contig_1010	24726	25034	-	103	K02946	RP-S10, MRPS10, rpsJ; small subunit ribosomal protein S10		1370.2	467.5	37.1254	1868.24	10.5505	35.8535	0.34119		1.36348		0.00769995	Suc
H3lac	H_contig_1010	25294	25671	+	126	K03282	mscL; large conductance mechanosensitive channel		180.955	185.622	88.5165	230.449	4.31231	41.1843	1.02579		1.27352		0.0238309	Suc
H3lac	H_contig_1010	25745	27235	-	497	K01733	thrC; threonine synthase [EC:4.2.3.1]		189.891	146.713	5.77049	259.441	2.18652	41.7936	0.772618		1.36626		0.0115146	Suc
H3lac	H_contig_1010	27348	27941	-	198	K02601	nusG; transcriptional antiterminator NusG		118.068	92.0664	9.65634	176.476	0	41.0302	0.779772		1.4947		ZERO	Suc
H3lac	H_contig_1010	28075	28269	-	65	K03073	secE; preprotein translocase subunit SecE		88.8036	47.6233	14.7074	106.001	0	34.9521	0.536277		1.19365		ZERO	Suc
H3lac	H_contig_1010	32037	32849	-	271	K09816	znuB; zinc transport system permease protein		10.6499	15.2301	0	72.6414	2.00499	38.1292	1.43007		6.82087	OC	0.188264
H3lac	H_contig_1010	39667	44061	-	1465	K03763	DPO3A2, polC; DNA polymerase III subunit alpha, Gram-positive type [EC:2.7.7.7]		50.8272	28.1731	9.57065	44.3435	4.45066	39.1651	0.554291		0.872437		0.0875646	Suc
H3lac	H_contig_1010	46848	47246	+	133				69.4404	20.6885	4.79187	96.2089	12.256	38.5192	0.297932		1.38549		0.176497	Suc
H3lac	H_contig_1010	47282	47725	-	148	K06929	K06929		136.506	130.142	73.2055	156.289	0	38.1703	0.953381		1.14493		ZERO	Suc
H3lac	H_contig_1010	47792	48400	-	203	K00540	E1.-.-.-		78.1953	62.6897	36.1043	109.096	2.67661	39.147	0.801707		1.39518		0.0342298	Suc
H3lac	H_contig_1010	49125	50276	-	384	K06941	rlmN; 23S rRNA (adenine2503-C2)-methyltransferase [EC:2.1.1.192]		65.3886	41.2019	7.46858	82.0243	1.41498	42.0371	0.630108		1.25441		0.0216395	Suc
H3lac	H_contig_1010	50468	50710	-	81				142.524	267.514	232.11	273.414	26.8322	32.7303	1.87697		1.91837		0.188264	Suc
H3lac	H_contig_1010	50861	51550	-	230				57.7223	53.8351	36.0224	94.1496	7.08719	40.3516	0.932656		1.63108		0.122781	Suc
H3lac	H_contig_1010	51602	52957	-	452	K01081	E3.1.3.5; 5'-nucleotidase [EC:3.1.3.5]		65.7677	68.4849	58.5149	105.615	9.61684	40.6495	1.04131		1.60588		0.146224	Suc
H3lac	H_contig_1034	1988	6490	+	1501	K00265	gltB; glutamate synthase (NADPH/NADH) large chain [EC:1.4.1.13 1.4.1.14]		614.141	524.283	47.3424	790.515	19.5476	32.8966	0.853685		1.28719		0.0318292	Suc
H3lac	H_contig_1034	6492	7931	+	480	K00266	gltD; glutamate synthase (NADPH/NADH) small chain [EC:1.4.1.13 1.4.1.14]		628.933	577.543	102.9	907.393	21.5077	30.7355	0.91829		1.44275		0.0341971	Suc
H3lac	H_contig_1034	13353	13682	+	110	K00640	cysE; serine O-acetyltransferase [EC:2.3.1.30]		102.326	90.6767	28.969	263.969	4.93956	29.6059	0.886156		2.57969		0.0482728	Suc
H3lac	H_contig_1034	15130	16074	+	315	K11617	liaS; two-component system, NarL family, sensor histidine kinase LiaS [EC:2.7.13.3]		64.1359	70.973	62.7202	79.6807	6.8997	32.303	1.1066		1.24237		0.107579	Suc
H3lac	H_contig_1034	16082	16717	+	212	K11618	liaR; two-component system, NarL family, response regulator LiaR		69.4302	64.8955	64.6337	81.2504	2.56298	32.9068	0.934688		1.17025		0.0369145	Suc
H3lac	H_contig_1034	16736	17536	+	267	K07024	K07024		63.7756	57.9685	56.0936	108.751	2.03502	32.8076	0.908944		1.70522		0.0319091	Suc
H3lac	H_contig_1034	17566	18162	+	199	K03768	PPIB, ppiB; peptidyl-prolyl cis-trans isomerase B (cyclophilin B) [EC:5.2.1.8]		118.925	129.628	94.4769	170.643	8.19123	32.3559	1.08999		1.43488		0.068877	Suc
H3lac	H_contig_1034	18166	18558	+	131	K02945	RP-S1, rpsA; small subunit ribosomal protein S1		125.579	94.5196	102.166	150.273	8.29544	29.3169	0.752669		1.19664		0.0660575	Suc
H3lac	H_contig_1034	22005	22247	+	81				78.3884	67.94	19.6703	85.0622	0	29.5831	0.86671		1.08514		ZERO	Suc
H3lac	H_contig_1089	357	1232	-	292				90.9324	63.6065	41.4694	121.351	3.72158	41.0198	0.699492		1.33452		0.0409269	Suc
H3lac	H_contig_1089	1241	2983	-	581	K01876	DARS, aspS; aspartyl-tRNA synthetase [EC:6.1.1.12]		75.0092	58.015	35.1019	99.9538	4.676	38.9835	0.773438		1.33255		0.062339	Suc
H3lac	H_contig_1089	3016	3255	-	80				72.1529	55.8913	15.933	55.3664	0	35.9359	0.774622		0.767348		ZERO	Suc
H3lac	H_contig_1089	3259	3489	-	77				56.2231	35.7347	37.2459	89.481	0	33.7896	0.635588		1.59154		ZERO	Suc
H3lac	H_contig_1089	3489	4772	-	428	K01892	HARS, hisS; histidyl-tRNA synthetase [EC:6.1.1.21]		74.1759	55.4493	29.0367	93.1397	6.34756	37.8933	0.747538		1.25566		0.0855745	Suc
H3lac	H_contig_1089	5013	5570	-	186	K00995	E2.7.8.5, pgsA, PGS1; CDP-diacylglycerol--glycerol-3-phosphate 3-phosphatidyltransferase [EC:2.7.8.5]		85.3422	44.3802	18.8454	95.254	0	39.2443	0.520026		1.11614		ZERO	Suc
H3lac	H_contig_1089	5578	6444	-	289	K15539	rodZ; cytoskeleton protein RodZ		92.875	48.7951	15.4368	103.878	1.88011	38.4443	0.525385		1.11848		0.0202434	Suc
H3lac	H_contig_1089	9386	9784	+	133	K14761	ybcJ; ribosome-associated protein		52.0803	23.2746	31.1471	66.6062	0	35.5225	0.446897		1.27891		ZERO	Suc
H3lac	H_contig_1089	10994	13441	-	816	K03693	pbp; penicillin-binding protein		110.352	80.0855	34.3652	131.48	1.99762	40.9679	0.725731		1.19147		0.0181023	Suc
H3lac	H_contig_1089	14325	15578	+	418	K01866	YARS, tyrS; tyrosyl-tRNA synthetase [EC:6.1.1.1]		120.83	90.5122	8.38577	164.833	5.19953	37.5841	0.749085		1.36417		0.0430317	Suc
H3lac	H_contig_1089	15975	17384	-	470	K08169	yebQ; MFS transporter, DHA2 family, multidrug resistance protein		52.1957	20.4904	8.13598	60.7329	1.15607	39.1586	0.392569		1.16356		0.0221487	Suc
H3lac	H_contig_1089	17401	18624	-	408	K03151	thiI; thiamine biosynthesis protein ThiI		50.9315	26.1332	0	57.8995	0	35.3146	0.513105		1.13681		ZERO	Suc
H3lac	H_contig_1089	24568	24858	-	97	K02899	RP-L27, MRPL27, rpmA; large subunit ribosomal protein L27		443.331	141.833	36.1366	654.503	5.60156	33.7329	0.319927		1.47633		0.0126352	Suc
H3lac	H_contig_1089	25017	25355	-	113	K07584	K07584; hypothetical protein		559.345	206.976	5.63999	736.041	0	36.3557	0.370034		1.3159		ZERO	Suc
H3lac	H_contig_1089	25374	25685	-	104	K02888	RP-L21, MRPL21, rplU; large subunit ribosomal protein L21		1096.17	307.567	27.5763	1230.36	10.4491	37.7172	0.280584		1.12242		0.00953234	Suc
H3lac	H_contig_1089	25966	28515	-	850	K01256	pepN; aminopeptidase N [EC:3.4.11.2]		122.915	95.9003	64.1067	216.544	7.03161	40.0388	0.780219		1.76174		0.0572072	Suc
H3lac	H_contig_1179	271	1929	+	553	K01610	E4.1.1.49, pckA; phosphoenolpyruvate carboxykinase (ATP) [EC:4.1.1.49]		60.5406	96.4045	17.8634	97.0052	4.91276	36.001	1.59239		1.60232		0.0811482	Suc
H3lac	H_contig_1179	4782	8369	+	1196	K03043	rpoB; DNA-directed RNA polymerase subunit beta [EC:2.7.7.6]		248.071	129.986	31.1732	329.194	21.8067	35.641	0.523989		1.32702		0.0879053	Suc
H3lac	H_contig_1179	8540	12151	+	1204	K03046	rpoC; DNA-directed RNA polymerase subunit beta' [EC:2.7.7.6]		271.352	153.119	49.7574	384.642	35.2005	34.7542	0.56428		1.4175		0.129722	Suc
H3lac	H_contig_1179	33586	34056	+	157	K03095	sprL; SprT-like protein		71.6933	28.4796	2.02968	81.5018	3.46084	34.7799	0.397242		1.13681		0.0482728	Suc
H3lac	H_contig_1179	34053	34868	+	272	K15051	K15051, endA; DNA-entry nuclease		68.9697	26.5547	1.17154	68.7556	1.99762	32.5277	0.385019		0.996896		0.0289637	Suc
H3lac	H_contig_1179	34891	35892	+	334	K01488	E3.5.4.4, ADA, add; adenosine deaminase [EC:3.5.4.4]		63.9439	32.9529	7.63256	78.0949	3.2536	33.5125	0.515341		1.2213		0.0508821	Suc
H3lac	H_contig_1179	38314	39021	+	236	K14742	yeaZ; hypothetical protease [EC:3.4.-.-]		80.7134	52.4664	24.3045	87.5852	2.30234	33.4841	0.650033		1.08514		0.0285248	Suc
H3lac	H_contig_1179	38993	39559	+	189	K03789	rimI; ribosomal-protein-alanine N-acetyltransferase [EC:2.3.1.128]		50.3925	25.4775	20.2323	72.9104	5.74975	31.2938	0.505581		1.44685		0.114099	Suc
H3lac	H_contig_1179	39556	40002	+	149	K03789	rimI; ribosomal-protein-alanine N-acetyltransferase [EC:2.3.1.128]		58.1097	23.0836	4.27731	49.5449	3.64665	34.5952	0.397242		0.852609		0.0627546	Suc
H3lac	H_contig_1179	39999	41015	+	339	K01409	gcp, QRI7, OSGEPL; O-sialoglycoprotein endopeptidase [EC:3.4.24.57]		63.8521	55.8025	25.3799	88.5572	3.20561	31.8109	0.873933		1.38691		0.0502037	Suc
H3lac	H_contig_1179	42172	43065	-	298	K03217	yidC, spoIIIJ, OXA1; preprotein translocase subunit YidC		163.676	125.806	50.2583	173.407	10.94	35.8786	0.768628		1.05945		0.0668392	Suc
H3lac	H_contig_1179	43250	45010	-	587	K01835	pgm; phosphoglucomutase [EC:5.4.2.2]		214.861	365.626	320.288	378.96	27.7692	36.3505	1.70169		1.76375		0.129243	Suc
H3lac	H_contig_1179	52517	53590	+	358	K02835	prfA, MTRF1, MRF1; peptide chain release factor 1		58.0448	28.8223	3.56044	56.363	0	34.8143	0.496553		0.971026		ZERO	Suc
H3lac	H_contig_1179	53587	54654	+	356	K03575	mutY; A/G-specific adenine glycosylase [EC:3.2.2.-]		62.4244	26.0858	4.47555	73.2689	0	33.4575	0.417878		1.17372		ZERO	Suc
H3lac	H_contig_1179	55459	56085	+	209	K07566	rimN, SUA5; tRNA threonylcarbamoyladenosine biosynthesis protein		231.994	223.812	35.0678	353.214	5.19953	34.7613	0.964731		1.52252		0.0224124	Suc
H3lac	H_contig_1179	56075	57328	+	418	K00600	glyA, SHMT; glycine hydroxymethyltransferase [EC:2.1.2.1]		328.658	316.793	28.969	505.097	11.699	35.8213	0.963897		1.53684		0.0355961	Suc
H3lac	H_contig_1179	57340	58323	+	328				226.138	239.085	29.1457	367.609	0	36.0042	1.05725		1.6256		ZERO	Suc
H3lac	H_contig_1179	58361	58954	+	198				215.73	222.349	41.8441	280.871	0	33.8441	1.03068		1.30196		ZERO	Suc
H3lac	H_contig_1179	60681	61550	+	290	K00297	metF, MTHFR; methylenetetrahydrofolate reductase (NADPH) [EC:1.5.1.20]		58.7175	36.7667	20.8777	74.6704	5.62088	34.2311	0.626161		1.27169		0.0957274	Suc
H3lac	H_contig_1179	62878	63552	+	225	K02986	RP-S4, rpsD; small subunit ribosomal protein S4		736.28	250.699	46.7367	848.678	7.24468	35.1927	0.340493		1.15266		0.00983957	Suc
H3lac	H_contig_1179	65391	67457	+	689	K02003	ABC.CD.A; putative ABC transport system ATP-binding protein		72.0482	60.4027	9.24991	104.286	3.15443	35.5904	0.838366		1.44745		0.0437823	Suc
H3lac	H_contig_1256	140	1147	+	336	K00850	pfkA, PFK; 6-phosphofructokinase 1 [EC:2.7.1.11]		703.491	420.72	20.8646	1012.12	3.23423	28.553	0.598046		1.43871		0.00459741	Suc
H3lac	H_contig_1256	1274	2776	+	501	K00873	PK, pyk; pyruvate kinase [EC:2.7.1.40]		876.204	516.949	51.5198	1206.3	28.1979	31.8074	0.589987		1.37673		0.0321818	Suc
H3lac	H_contig_1256	5582	6793	+	404	K03544	clpX, CLPX; ATP-dependent Clp protease ATP-binding subunit ClpX		68.581	53.6352	12.6202	110.855	1.34493	31.3188	0.782071		1.6164		0.0196108	Suc
H3lac	H_contig_1256	6820	7437	+	206	K03978	engB; GTP-binding protein		117.686	66.7857	18.5627	112.286	0	30.9612	0.567489		0.95411		ZERO	Suc
H3lac	H_contig_1256	7532	8815	+	428	K00003	E1.1.1.3; homoserine dehydrogenase [EC:1.1.1.3]		301.424	193.671	26.8031	336.913	8.88659	29.5653	0.642519		1.11774		0.029482	Suc
H3lac	H_contig_1256	8827	9699	+	291	K00872	thrB1; homoserine kinase [EC:2.7.1.39]		300.513	291.941	127.026	375.451	28.0078	30.0962	0.971474		1.24937		0.0931999	Suc
H3lac	H_contig_1256	11827	12945	+	373	K11072	potA; spermidine/putrescine transport system ATP-binding protein [EC:3.6.3.31]		76.602	20.2864	1.70863	68.6101	0	30.0047	0.264828		0.89567		ZERO	Suc
H3lac	H_contig_1256	13036	14220	+	395				50.4157	33.0885	5.64713	51.0835	0	31.0589	0.656313		1.01324		ZERO	Suc
H3lac	H_contig_1256	15010	15792	+	261	K11070	potC; spermidine/putrescine transport system permease protein		56.3954	36.8984	1.22092	62.2253	2.08181	29.9607	0.654281		1.10338		0.0369145	Suc
H3lac	H_contig_1256	15779	16603	+	275	K06872	K06872; uncharacterized protein		72.4153	60.0342	24.334	91.2706	3.95165	30.0247	0.829027		1.26038		0.0545692	Suc
H3lac	H_contig_1256	16656	17240	+	195	K03744	lemA; LemA protein		100.644	95.2466	39.2196	133.763	5.57283	29.3441	0.946371		1.32907		0.0553717	Suc
H3lac	H_contig_1256	17241	18314	+	358	K11069	potD; spermidine/putrescine transport system substrate-binding protein		112.059	86.4669	51.6264	167.714	1.51774	30.6122	0.771622		1.49667		0.0135442	Suc
H3lac	H_contig_1256	18323	18583	+	87				126.06	71.1613	43.953	118.794	6.24542	24.5736	0.564502		0.942357		0.0495431	Suc
H3lac	H_contig_1256	18664	19899	+	412	K03215	rumA; 23S rRNA (uracil1939-C5)-methyltransferase [EC:2.1.1.190]		55.3406	38.4018	5.41411	72.8662	1.31881	28.2202	0.693917		1.31669		0.0238309	Suc
H3lac	H_contig_136	1094	2083	-	330	K05540	dusB; tRNA-dihydrouridine synthase B [EC:1.-.-.-]		66.4681	37.5214	6.75944	77.5502	0	37.2739	0.564502		1.16673		ZERO	Suc
H3lac	H_contig_136	2085	2945	-	287	K04083	hslO; molecular chaperone Hsp33		53.2976	20.3731	4.44124	58.303	0	38.8521	0.382252		1.09391		ZERO	Suc
H3lac	H_contig_136	12950	14125	+	392	K03553	recA; recombination protein RecA		113.383	58.7867	10.5678	146.89	0	37.6879	0.518478		1.29552		ZERO	Suc
H3lac	H_contig_136	14304	14702	+	133	K16509	spxA; regulatory protein spx		175.771	149.992	98.2333	325.63	20.4267	40.6135	0.853335		1.85258		0.116212	Suc
H3lac	H_contig_136	20483	21253	+	257	K03424	tatD; TatD DNase family protein [EC:3.1.21.-]		55.0271	42.826	24.7984	65.1087	2.11421	36.4182	0.77827		1.18321		0.0384212	Suc
H3lac	H_contig_136	21250	21780	+	177				61.9618	29.148	18.0033	69.5121	3.06978	38.1762	0.470418		1.12185		0.0495431	Suc
H3lac	H_contig_136	25037	26386	+	450	K03699	tlyC; putative hemolysin		96.8452	45.0952	7.08132	133.426	3.62234	39.8281	0.465642		1.37773		0.0374034	Suc
H3lac	H_contig_136	26832	27554	+	241	K03436	fruR2, fruR; DeoR family transcriptional regulator, fructose operon transcriptional repressor		572.433	470.964	318.659	292.02	60.8734	38.7627	0.82274		0.510138		0.106341	Suc
H3lac	H_contig_136	27532	28443	+	304	K00882	fruK; 1-phosphofructokinase [EC:2.7.1.56]		468.045	400.516	431.867	391.774	82.2176	38.9772	0.855723		0.837044		0.175662	Suc
H3lac	H_contig_136	30559	32046	-	496	K04567	KARS, lysS; lysyl-tRNA synthetase, class II [EC:6.1.1.6]		150.125	89.4538	3.85475	189.516	2.19093	37.3532	0.595863		1.26239		0.0145941	Suc
H3lac	H_contig_136	33791	34999	+	403	K01940	E6.3.4.5, argG; argininosuccinate synthase [EC:6.3.4.5]		977.556	2025.27	198.47	446.961	80.896	39.1514	2.07177		0.457223		0.0827533	Suc
H3lac	H_contig_136	35281	36678	+	466	K01755	argH, ASL; argininosuccinate lyase [EC:4.3.2.1]		229.775	411.85	35.5585	144.687	18.6558	37.5902	1.79241		0.629689		0.0811919	Suc
H3lac	H_contig_136	37355	38167	+	271	K03217	yidC, spoIIIJ, OXA1; preprotein translocase subunit YidC		105.434	57.1128	10.5828	138.019	0	37.73	0.541694		1.30906		ZERO	Suc
H3lac	H_contig_136	38293	39189	+	299	K06346	jag; spoIIIJ-associated protein		111.97	59.8167	15.9863	123.448	3.63446	41.5805	0.534222		1.10251		0.0324593	Suc
H3lac	H_contig_136	40665	41003	+	113				158.353	389.603	386.339	357.132	4.80842	34.267	2.46034		2.25529		0.0303651	Suc
H3lac	H_contig_136	41003	41434	+	144	K07447	ruvX; putative holliday junction resolvase [EC:3.1.-.-]		312.663	525.473	597.486	587.84	37.7327	35.29	1.68064		1.88011		0.120682	Suc
H3lac	H_contig_136	41603	41920	+	106				182.424	288.785	252.522	399.288	25.6298	40.9419	1.58304		2.18879		0.140495	Suc
H3lac	H_contig_136	43526	44956	+	477	K14260	alaA; alanine-synthesizing transaminase [EC:2.6.1.66 2.6.1.2]		136.743	242.998	183.045	237.303	10.2519	38.5693	1.77704		1.7354		0.0749723	Suc
H3lac	H_contig_136	45063	45851	+	263	K03706	codY; transcriptional pleiotropic repressor		255.69	304.713	94.5073	469.69	16.5278	37.0975	1.19173		1.83695		0.0646399	Suc
H3lac	H_contig_136	46272	48035	+	588	K01876	DARS, aspS; aspartyl-tRNA synthetase [EC:6.1.1.12]		111.42	90.0812	7.58713	184.136	6.46847	38.3476	0.808484		1.65263		0.0580549	Suc
H3lac	H_contig_136	48488	48781	+	98	K02435	gatC, GATC; aspartyl-tRNA(Asn)/glutamyl-tRNA(Gln) amidotransferase subunit C [EC:6.3.5.6 6.3.5.7]		144.306	112.309	19.5098	165.722	5.5444	36.2739	0.77827		1.14841		0.0384212	Suc
H3lac	H_contig_136	48784	50232	+	483	K02433	gatA, QRSL1; aspartyl-tRNA(Asn)/glutamyl-tRNA(Gln) amidotransferase subunit A [EC:6.3.5.6 6.3.5.7]		200.176	168.769	40.2448	288.359	6.74971	38.8294	0.843102		1.44053		0.0337189	Suc
H3lac	H_contig_136	50235	50840	+	202	K01515	nudF; ADP-ribose pyrophosphatase [EC:3.6.1.13]		247.177	182.189	53.6357	328.909	2.68986	39.5909	0.737079		1.33066		0.0108823	Suc
H3lac	H_contig_136	50874	52304	+	477	K02434	gatB, PET112; aspartyl-tRNA(Asn)/glutamyl-tRNA(Gln) amidotransferase subunit B [EC:6.3.5.6 6.3.5.7]		269.25	206.224	74.1534	438.494	11.391	38.6224	0.765919		1.62858		0.0423065	Suc
H3lac	H_contig_136	57775	58509	+	245				53.0103	94.0588	40.3202	102.447	2.21776	41.2052	1.77435		1.93258		0.0418364	Suc
H3lac	H_contig_136	58550	59725	+	392	K00100	E1.1.1.-		94.2405	126.348	102.426	156.934	11.0888	36.39	1.34069		1.66525		0.117665	Suc
H3lac	H_contig_136	74387	75319	+	311	K15986	ppaC; manganese-dependent inorganic pyrophosphatase [EC:3.6.1.1]		154.978	72.9918	5.12314	181.983	3.49422	37.178	0.470982		1.17425		0.0225466	Suc
H3lac	H_contig_136	77612	79033	+	474	K00033	E1.1.1.44, PGD, gnd; 6-phosphogluconate dehydrogenase [EC:1.1.1.44]		275.825	259.048	105.547	456.844	12.6094	36.3496	0.939175		1.65628		0.0457153	Suc
H3lac	H_contig_136	79114	79806	+	231	K02483	K02483; two-component system, OmpR family, response regulator		279.866	315.656	242.788	528.364	18.8174	38.5365	1.12788		1.88792		0.0672371	Suc
H3lac	H_contig_136	80161	81657	+	499	K00936	E2.7.3.-		65.3569	44.8026	10.2175	94.6813	2.17776	40.4234	0.685506		1.44868		0.033321	Suc
H3lac	H_contig_136	83401	84639	+	413	K03320	amt, AMT, MEP; ammonium transporter, Amt family		118.799	119.09	10.0304	206.153	10.525	38.6349	1.00245		1.73531		0.0885947	Suc
H3lac	H_contig_136	84779	85120	+	114	K04751	glnB; nitrogen regulatory protein P-II 1		184.813	153.871	11.181	267.658	4.76624	33.9565	0.832576		1.44827		0.0257896	Suc
H3lac	H_contig_136	85432	86790	+	453	K01925	murD; UDP-N-acetylmuramoylalanine--D-glutamate ligase [EC:6.3.2.9]		62.437	38.7224	4.22065	78.2218	0	37.9433	0.620184		1.25281		ZERO	Suc
H3lac	H_contig_136	86793	87899	+	369	K02563	murG; UDP-N-acetylglucosamine--N-acetylmuramyl-(pentapeptide) pyrophosphoryl-undecaprenol N-acetylglucosamine transferase [EC:2.4.1.227]		59.4431	31.6915	6.04503	88.026	0	37.9396	0.533141		1.48085		ZERO	Suc
H3lac	H_contig_136	87889	88959	+	357	K03589	ftsQ; cell division protein FtsQ		88.928	47.2083	7.14082	103.392	3.04398	36.9169	0.53086		1.16265		0.0342298	Suc
H3lac	H_contig_136	89186	91162	+	659	K15580	oppA, mppA; oligopeptide transport system substrate-binding protein		361.312	257.307	32.3978	463.767	10.7186	40.0281	0.712147		1.28356		0.0296658	Suc
H3lac	H_contig_136	91480	93006	+	509	K15581	oppB; oligopeptide transport system permease protein		174.074	76.3574	7.5126	221.417	3.20246	38.4167	0.438649		1.27197		0.0183971	Suc
H3lac	H_contig_136	93008	93928	+	307	K15582	oppC; oligopeptide transport system permease protein		181.44	96.3498	7.26585	211.607	0	38.8876	0.531028		1.16626		ZERO	Suc
H3lac	H_contig_136	93945	95003	+	353	K15583	oppD; oligopeptide transport system ATP-binding protein		235.468	133.486	15.3462	269.077	3.07848	37.1817	0.566898		1.14273		0.0130739	Suc
H3lac	H_contig_136	95006	95929	+	308	K10823	oppF; oligopeptide transport system ATP-binding protein		190.221	119.488	21.7268	244.475	0	39.5862	0.628151		1.28521		ZERO	Suc
H3lac	H_contig_136	95926	97440	+	505	K03979	obg; GTP-binding protein		103.443	83.092	27.7644	128.64	2.15189	37.3666	0.803263		1.24358		0.0208026	Suc
H3lac	H_contig_136	97527	97703	+	59				146.752	122.422	59.411	200.195	0	31.9399	0.834209		1.36417		ZERO	Suc
H3lac	H_contig_136	97700	98686	+	329	K06217	phoH, phoL; phosphate starvation-inducible protein PhoH and related proteins		127.2	134.86	47.4599	178.01	1.65152	38.2185	1.06023		1.39945		0.0129837	Suc
H3lac	H_contig_136	98679	99149	+	157				117.651	89.8203	50.7419	122.253	6.92167	38.0508	0.76345		1.03912		0.0588324	Suc
H3lac	H_contig_136	99192	99683	+	164	K07042	ybeY, yqfG; probable rRNA maturation factor		126.708	81.7921	54.4052	153.045	6.62624	36.1353	0.645519		1.20786		0.0522955	Suc
H3lac	H_contig_136	99667	100068	+	134	K00901	E2.7.1.107, DGK, dgkA; diacylglycerol kinase (ATP dependent) [EC:2.7.1.107]		81.8451	77.0029	90.3661	161.6	0	38.0965	0.940837		1.97446		ZERO	Suc
H3lac	H_contig_136	103223	103666	-	148	K00536	: No such data.		167.707	99.9303	47.3683	242.747	3.67129	36.6315	0.595863		1.44745		0.0218911	Suc
H3lac	H_contig_136	103887	104741	+	285	K01265	E3.4.11.18, map; methionyl aminopeptidase [EC:3.4.11.18]		98.2292	85.6848	59.2594	139.873	13.3455	35.2735	0.872295		1.42394		0.13586	Suc
H3lac	H_contig_136	104763	105689	+	309	K07058	K07058; membrane protein		73.7874	58.994	42.2816	113.082	1.75842	37.979	0.799513		1.53254		0.0238309	Suc
H3lac	H_contig_136	106471	106974	+	168				292.048	198.588	18.9678	424.768	3.23423	35.7127	0.679985		1.45445		0.0110743	Suc
H3lac	H_contig_136	106990	107463	+	158	K00432	E1.11.1.9; glutathione peroxidase [EC:1.11.1.9]		308.705	191.565	30.2525	445.423	6.87786	37.3283	0.620544		1.44288		0.0222797	Suc
H3lac	H_contig_136	111013	112341	+	443	K00789	metK; S-adenosylmethionine synthetase [EC:2.5.1.6]		137.465	71.429	5.75457	183.305	2.45305	37.2277	0.519615		1.33346		0.0178449	Suc
H3lac	H_contig_136	112588	114189	+	534	K06950	K06950; uncharacterized protein		297.259	161.668	43.562	340.078	19.3327	38.6924	0.543861		1.14405		0.0650366	Suc
H3lac	H_contig_136	114423	115052	+	210	K00942	E2.7.4.8, gmk; guanylate kinase [EC:2.7.4.8]		156.675	93.3568	1.51743	196.858	2.58739	35.841	0.595863		1.25648		0.0165144	Suc
H3lac	H_contig_136	115220	115642	+	141	K03060	rpoZ; DNA-directed RNA polymerase subunit omega [EC:2.7.7.6]		165.798	63.4227	4.51999	118.673	0	34.3045	0.38253		0.71577		ZERO	Suc
H3lac	H_contig_136	119735	120247	+	171	K06962	K06962		55.697	56.3187	31.6796	83.4633	3.17749	35.3411	1.01116		1.49852		0.0570496	Suc
H3lac	H_contig_136	120297	121166	+	290	K07030	K07030		71.6553	92.5097	63.7319	100.126	5.62088	35.9673	1.29104		1.39733		0.0784433	Suc
H3lac	H_contig_136	121310	122698	+	463	K03590	ftsA; cell division protein FtsA		238.744	207.259	70.2014	369.906	7.04127	36.2077	0.868125		1.54939		0.029493	Suc
H3lac	H_contig_136	122839	124104	+	422	K03531	ftsZ; cell division protein FtsZ		332.382	278.743	104.206	544.625	15.4507	37.6319	0.838622		1.63855		0.0464849	Suc
H3lac	H_contig_136	124108	124770	+	221	K06997	K06997		304.283	206.99	46.1407	400.843	2.4586	38.2865	0.680256		1.31734		0.00807999	Suc
H3lac	H_contig_136	124820	125368	+	183	K09772	sepF; cell division inhibitor SepF		233.413	148.48	62.6871	354.99	2.96913	36.1133	0.636124		1.52087		0.0127205	Suc
H3lac	H_contig_136	125368	125613	+	82	K02221	yggT; YggT family protein		256.935	180.362	62.1774	336.099	0	32.268	0.701976		1.30811		ZERO	Suc
H3lac	H_contig_136	125613	126410	+	266				166.006	106.029	32.3451	218.32	6.12802	40.2742	0.638703		1.31513		0.0369145	Suc
H3lac	H_contig_136	126514	127218	+	235	K04074	divIVA; cell division initiation protein		249.311	155.142	62.3759	280.628	4.62427	39.9127	0.622281		1.12561		0.0185482	Suc
H3lac	H_contig_136	127908	130706	+	933	K01870	IARS, ileS; isoleucyl-tRNA synthetase [EC:6.1.1.5]		126.21	74.4664	11.2709	147.696	2.91185	37.7229	0.590022		1.17025		0.0230715	Suc
H3lac	H_contig_136	132730	133674	+	315	K06023	hprK, ptsK; HPr kinase/phosphorylase [EC:2.7.11.- 2.7.4.-]		88.8741	96.0866	27.3137	135.926	5.17477	36.5305	1.08115		1.52942		0.0582259	Suc
H3lac	H_contig_136	133674	134471	+	266	K13292	lgt, umpA; phosphatidylglycerol:prolipoprotein diacylglycerol transferase [EC:2.-.-.-]		111.756	107.322	28.7512	149.864	0	34.9523	0.960323		1.341		ZERO	Suc
H3lac	H_contig_136	134587	134985	+	133				225.681	411.184	457.623	525.449	12.256	36.6137	1.82197		2.32828		0.0543069	Suc
H3lac	H_contig_136	135122	135715	+	198				231.764	401.271	479.598	427.52	19.2094	37.317	1.73138		1.84464		0.0828834	Suc
H3lac	H_contig_1474	103	1371	+	423	K00790	murA; UDP-N-acetylglucosamine 1-carboxyvinyltransferase [EC:2.5.1.7]		77.0996	30.8982	6.02665	103.548	1.28452	33.8037	0.400758		1.34305		0.0166605	Suc
H3lac	H_contig_1474	3648	3890	+	81	K02909	RP-L31, rpmE; large subunit ribosomal protein L31		616.417	280.252	27.5385	558.98	26.8322	29.8262	0.454647		0.906821		0.0435292	Suc
H3lac	H_contig_1474	4404	4943	+	180				59.3257	49.6811	1.77033	131.239	0	36.7229	0.83743		2.21217		ZERO	Suc
H3lac	H_contig_1474	4933	5703	+	257				72.9952	45.5026	1.23992	93.8332	2.11421	37.3322	0.623365		1.28547		0.0289637	Suc
H3lac	H_contig_1474	5700	6401	+	234	K03710	K03710; GntR family transcriptional regulator		65.3693	49.9751	9.53254	73.6115	2.32201	38.4027	0.764504		1.12609		0.0355215	Suc
H3lac	H_contig_1521	15136	15639	-	168				51.5378	36.8514	3.79356	38.0827	3.23423	35.7677	0.715036		0.738927		0.0627546	Suc
H3lac	H_contig_1521	15639	16088	-	150	K07441	ALG14; beta-1,4-N-acetylglucosaminyltransferase [EC:2.4.1.141]		69.2668	43.5665	4.24879	72.1813	3.62234	37.0549	0.628967		1.04208		0.0522955	Suc
H3lac	H_contig_1521	16090	16776	-	229	K00996	E2.7.8.6, rfbP; undecaprenyl-phosphate galactose phosphotransferase [EC:2.7.8.6]		81.9203	81.1052	13.9153	122.499	0	37.2786	0.99005		1.49534		ZERO	Suc
H3lac	H_contig_1521	16800	17564	-	255	K01104	E3.1.3.48; protein-tyrosine phosphatase [EC:3.1.3.48]		100.731	74.1845	14.9957	115.799	0	36.9222	0.73646		1.14958		ZERO	Suc
H3lac	H_contig_1521	17619	18314	-	232	K00903	E2.7.10.-; protein-tyrosine kinase [EC:2.7.10.-]		92.0572	80.0564	9.61472	93.3379	0	36.2917	0.869638		1.01391		ZERO	Suc
H3lac	H_contig_1521	21213	21884	+	224	K03499	trkA; trk system potassium uptake protein TrkA		60.5569	75.2382	61.1712	72.5036	4.85135	39.2879	1.24244		1.19728		0.0801123	Suc
H3lac	H_contig_1521	27666	28991	-	442	K01689	ENO, eno; enolase [EC:4.2.1.11]		2247.51	1812.33	292.705	3519.62	115.554	37.9542	0.806372		1.56601		0.0514143	Suc
H3lac	H_contig_1521	29854	32298	-	815	K03696	clpC; ATP-dependent Clp protease ATP-binding subunit ClpC		63.0342	58.2387	23.8506	111.714	0.666689	36.2193	0.923923		1.77228		0.0105766	Suc
H3lac	H_contig_1521	34447	34929	-	161	K03624	greA; transcription elongation factor GreA		281.441	166.632	21.7718	278.169	3.37485	37.3185	0.592068		0.988374		0.0119913	Suc
H3lac	H_contig_1521	35039	36670	-	544	K07082	K07082; UPF0755 protein		193.646	124.554	13.4727	237.026	4.99404	38.4571	0.643206		1.22402		0.0257896	Suc
H3lac	H_contig_1521	36804	37406	-	201	K03048	rpoE; DNA-directed RNA polymerase subunit delta		136.408	66.7358	11.0976	166.497	2.70324	35.5053	0.489235		1.22058		0.0198172	Suc
H3lac	H_contig_1521	43201	43875	-	225				70.5495	64.2033	41.0716	102.804	4.82979	33.8968	0.910046		1.45719		0.0684596	Suc
H3lac	H_contig_1521	43862	45115	-	418	K03665	hflX; GTP-binding protein HflX		57.9985	41.9647	17.5339	51.8048	2.59977	38.8382	0.723548		0.893209		0.0448247	Suc
H3lac	H_contig_1596	1999	4005	-	669	K00705	malQ; 4-alpha-glucanotransferase [EC:2.4.1.25]		86.2815	168.631	184.337	156.692	5.68529	39.4949	1.95443		1.81606		0.0658923	Suc
H3lac	H_contig_1596	4287	5969	-	561	K07030	K07030		145.592	139.173	45.4416	219.316	7.74833	38.5725	0.955908		1.50638		0.0532195	Suc
H3lac	H_contig_1596	5971	6333	-	121				131.187	113.701	26.3355	203.366	4.49051	37.6726	0.86671		1.5502		0.0342298	Suc
H3lac	H_contig_1596	6620	6808	-	63	K02902	RP-L28, MRPL28, rpmB; large subunit ribosomal protein L28		215.313	49.1352	0	304.662	0	35.0041	0.228203		1.41497		ZERO	Suc
H3lac	H_contig_1596	7207	7887	+	227				85.1849	75.7591	32.2871	121.41	0	39.107	0.889348		1.42526		ZERO	Suc
H3lac	H_contig_1727	2268	3377	-	370	K01179	E3.2.1.4; endoglucanase [EC:3.2.1.4]		82.6833	67.8597	1.72248	79.8074	0	39.3767	0.820717		0.965217		ZERO	Suc
H3lac	H_contig_1727	3398	4708	-	437	K00754	E2.4.1.-		66.7043	54.3073	5.83358	90.0953	0	38.0986	0.81415		1.35067		ZERO	Suc
H3lac	H_contig_1727	4861	5742	-	294				73.6254	51.4749	5.41938	78.6763	0	38.7181	0.699146		1.0686		ZERO	Suc
H3lac	H_contig_1727	5720	6907	-	396	K01791	wecB; UDP-N-acetylglucosamine 2-epimerase [EC:5.1.3.14]		91.831	85.9866	4.02348	115.58	2.7442	37.5069	0.936357		1.25861		0.0298831	Suc
H3lac	H_contig_1727	7259	9631	-	791	K01890	FARSB, pheT; phenylalanyl-tRNA synthetase beta chain [EC:6.1.1.20]		116.028	66.5282	7.25141	185.41	1.37383	35.0705	0.573378		1.59797		0.0118405	Suc
H3lac	H_contig_1727	9773	10810	-	346	K01889	FARSA, pheS; phenylalanyl-tRNA synthetase alpha chain [EC:6.1.1.20]		114.277	53.6795	0.920981	192.022	4.71114	36.5567	0.469732		1.68032		0.0412257	Suc
H3lac	H_contig_1727	12423	13688	-	422	K16169	pbuX; xanthine permease		75.9144	64.388	10.5716	85.1342	1.28756	33.9149	0.848166		1.12145		0.0169607	Suc
H3lac	H_contig_1727	13690	14271	-	194	K03816	xpt; xanthine phosphoribosyltransferase [EC:2.4.2.22]		65.4583	56.7334	3.28515	86.2523	0	34.4766	0.86671		1.31767		ZERO	Suc
H3lac	H_contig_1763	200	2155	+	652	K02622	parE; topoisomerase IV subunit B [EC:5.99.1.-]		58.8732	36.9267	16.6172	76.2373	0.833361	30.9708	0.627225		1.29494		0.0141552	Suc
H3lac	H_contig_1763	2157	3497	+	447	K03498	trkH; trk system potassium uptake protein TrkH		67.7947	42.32	18.535	70.4638	0	29.825	0.624238		1.03937		ZERO	Suc
H3lac	H_contig_1763	4827	7274	+	816	K02621	parC; topoisomerase IV subunit A [EC:5.99.1.-]		64.3717	31.1912	15.23	65.74	0.665872	31.6115	0.484548		1.02126		0.0103442	Suc
H3lac	H_contig_185	18	902	+	295	K06949	rsgA, engC; ribosome biogenesis GTPase [EC:3.6.1.-]		61.6357	65.2915	20.5238	88.4194	0	36.0352	1.05931		1.43455		ZERO	Suc
H3lac	H_contig_185	899	1546	+	216	K01783	rpe, RPE; ribulose-phosphate 3-epimerase [EC:5.1.3.1]		82.8422	78.0248	53.1099	107.087	2.51552	32.3025	0.941848		1.29266		0.0303651	Suc
H3lac	H_contig_185	1762	2898	+	379	K03547	sbcD; exonuclease SbcD		76.9123	85.3059	31.95	94.7932	1.43364	38.9206	1.10913		1.23248		0.01864	Suc
H3lac	H_contig_185	2888	5053	+	722	K03546	sbcC; exonuclease SbcC		98.3358	114.808	53.8455	160.868	3.76282	38.7995	1.1675		1.6359		0.038265	Suc
H3lac	H_contig_185	5050	6000	+	317	K03698	cbf; CMP-binding protein		119.269	121.52	57.2984	178.539	5.14213	36.3696	1.01888		1.49695		0.0431138	Suc
H3lac	H_contig_185	9690	10799	+	370	K01739	metB; cystathionine gamma-synthase [EC:2.5.1.48]		97.5039	86.4513	20.6698	154.294	1.46852	35.0023	0.886645		1.58244		0.0150611	Suc
H3lac	H_contig_185	10806	11972	+	389	K14155	patB, malY; cystathione beta-lyase [EC:4.4.1.8]		123.903	121.133	29.4903	172.061	1.39679	35.734	0.977644		1.38868		0.0112733	Suc
H3lac	H_contig_185	12125	12760	+	212	K00761	upp, UPRT; uracil phosphoribosyltransferase [EC:2.4.2.9]		238.241	201.176	51.1057	331.966	0	33.084	0.844423		1.39341		ZERO	Suc
H3lac	H_contig_185	12765	13091	+	109				235.655	192.484	46.7757	297.996	0	35.4471	0.816801		1.26454		ZERO	Suc
H3lac	H_contig_185	13292	15136	+	615				52.0909	25.1668	3.10887	57.617	0	36.671	0.483132		1.10609		ZERO	Suc
H3lac	H_contig_185	16383	17867	-	495	K00036	G6PD, zwf; glucose-6-phosphate 1-dehydrogenase [EC:1.1.1.49]		97.37	66.7047	23.819	129.25	4.39072	35.1747	0.685064		1.32741		0.0450931	Suc
H3lac	H_contig_185	20028	21224	+	399	K02358	tuf, TUFM; elongation factor Tu		2770.38	1322.34	218.829	3965.53	103.495	33.9541	0.477313		1.4314		0.0373578	Suc
H3lac	H_contig_185	21562	21942	-	127				68.176	46.04	15.0548	93.0039	0	34.7385	0.675312		1.36417		ZERO	Suc
H3lac	H_contig_185	21965	23158	-	398	K04487	iscS, NFS1; cysteine desulfurase [EC:2.8.1.7]		69.6149	54.4437	16.8137	111.289	1.3652	35.0658	0.782071		1.59864		0.0196108	Suc
H3lac	H_contig_185	23170	24135	-	322	K00948	PRPS, prsA; ribose-phosphate pyrophosphokinase [EC:2.7.6.1]		131.757	74.7709	15.834	172.709	1.68743	34.6215	0.567489		1.31081		0.0128071	Suc
H3lac	H_contig_185	24514	25638	+	375				561.061	1044.68	1162.47	1006.6	95.6298	37.0825	1.86197		1.7941		0.170445	Suc
H3lac	H_contig_185	26699	27292	+	198	K00640	cysE; serine O-acetyltransferase [EC:2.3.1.30]		61.2207	38.2162	4.82817	77.0531	0	29.8885	0.624238		1.25861		ZERO	Suc
H3lac	H_contig_185	27307	28743	+	479	K01883	CARS, cysS; cysteinyl-tRNA synthetase [EC:6.1.1.16]		78.3288	50.9816	9.97889	96.5797	1.13435	35.8592	0.650866		1.233		0.0144818	Suc
H3lac	H_contig_185	28736	29134	+	133	K11145	K11145; ribonuclease III family protein [EC:3.1.26.-]		67.2704	46.5491	4.79187	55.5051	0	31.3611	0.69197		0.825105		ZERO	Suc
H3lac	H_contig_185	29187	29558	+	124				65.1704	66.5702	15.419	71.4405	0	30.5198	1.02148		1.09621		ZERO	Suc
H3lac	H_contig_185	37707	39659	+	651	K01868	TARS, thrS; threonyl-tRNA synthetase [EC:6.1.1.3]		105.514	81.892	8.81086	174.632	3.33856	34.1249	0.776125		1.65506		0.031641	Suc
H3lac	H_contig_185	44588	45766	+	393	K00812	aspB; aspartate aminotransferase [EC:2.6.1.1]		120.438	97.1451	23.5143	174.067	1.38257	34.1356	0.806595		1.44528		0.0114795	Suc
H3lac	H_contig_185	45793	46158	+	122	K01759	E4.4.1.5, GLO1, gloA; lactoylglutathione lyase [EC:4.4.1.5]		92.2611	109.95	26.1196	165.393	0	32.0037	1.19173		1.79266		ZERO	Suc
H3lac	H_contig_185	46272	47609	+	446	K01893	NARS, asnS; asparaginyl-tRNA synthetase [EC:6.1.1.22]		159.189	127.245	26.4359	195.313	7.30966	34.2322	0.799329		1.22692		0.045918	Suc
H3lac	H_contig_185	47626	48519	+	298	K01181	E3.2.1.8, xynA; endo-1,4-beta-xylanase [EC:3.2.1.8]		154.959	110.801	53.4663	196.528	3.64665	33.9384	0.715036		1.26826		0.023533	Suc
H3lac	H_contig_185	48665	49051	+	129	K09022	yjgF; UPF0076 protein YjgF		181.221	127.98	44.4641	122.083	0	33.1366	0.706208		0.673666		ZERO	Suc
H3lac	H_contig_185	49107	49697	-	197				334.028	591.867	126.17	744.464	22.065	33.3423	1.77191		2.22875		0.0660575	Suc
H3lac	H_contig_185	49717	50187	-	157				470.602	694.465	91.3355	858.904	3.46084	32.2384	1.47569		1.82512		0.00735406	Suc
H3lac	H_contig_185	50286	51116	-	277	K00941	thiD; hydroxymethylpyrimidine/phosphomethylpyrimidine kinase [EC:2.7.1.49 2.7.4.7]		374.049	522.749	42.5646	719.563	7.84623	31.9425	1.39754		1.92371		0.0209765	Suc
H3lac	H_contig_185	53167	56007	+	947	K03701	uvrA; excinuclease ABC subunit A	na (2)	95.0864	74.4551	31.9669	113.812	4.01632	33.6276	0.783026		1.19693		0.0422387	Suc
H3lac	H_contig_185	59906	63574	+	1223	K03737	nifJ; putative pyruvate-flavodoxin oxidoreductase [EC:1.2.7.-]		98.8784	74.8076	8.33777	94.566	5.33133	34.2356	0.756562		0.956387		0.053918	Suc
H3lac	H_contig_185	66140	67495	+	452	K03431	glmM; phosphoglucosamine mutase [EC:5.4.2.10]		83.0078	71.5286	16.215	114.326	0	34.7766	0.86171		1.37729		ZERO	Suc
H3lac	H_contig_185	70463	71335	+	291	K07024	K07024		51.5732	41.3681	6.57029	32.1332	0	34.0485	0.802124		0.62306		ZERO	Suc
H3lac	H_contig_185	73031	74527	+	499	K10117	msmE; raffinose/stachyose/melibiose transport system substrate-binding protein		57.2596	68.9271	63.8596	52.272	2.17776	35.4321	1.20376		0.912894		0.0380331	Suc
H3lac	H_contig_185	84643	85644	+	334	K00611	OTC, argF, argI; ornithine carbamoyltransferase [EC:2.1.3.3]		176.278	266.713	19.0814	85.4624	4.8804	31.5202	1.51303		0.484817		0.0276859	Suc
H3lac	H_contig_185	87592	88944	-	451	K00928	lysC; aspartate kinase [EC:2.7.2.4]		169.583	118.97	5.65249	232.432	4.81908	31.7814	0.701545		1.37061		0.0284172	Suc
H3lac	H_contig_185	89929	91896	+	656	K00974	cca; tRNA nucleotidyltransferase (CCA-adding enzyme) [EC:2.7.7.72 3.1.3.- 3.1.4.-]		97.6704	60.2954	4.37185	132.789	1.65656	35.5837	0.617336		1.35956		0.0169607	Suc
H3lac	H_contig_185	92167	92619	+	151	K02939	RP-L9, MRPL9, rplI; large subunit ribosomal protein L9		135.705	88.8338	8.44131	224.888	0	34.4889	0.65461		1.65718		ZERO	Suc
H3lac	H_contig_185	92620	93981	+	454	K02314	dnaB; replicative DNA helicase [EC:3.6.4.12]		174.82	94.6988	14.0379	211.384	2.39362	35.1988	0.541694		1.20915		0.0136919	Suc
H3lac	H_contig_185	94080	94328	+	83				177.34	116.03	26.8749	379.486	6.5464	31.0439	0.654281		2.13988		0.0369145	Suc
H3lac	H_contig_185	94371	95171	+	267				216.189	149.43	35.8044	302.292	0	34.0965	0.691201		1.39828		ZERO	Suc
H3lac	H_contig_185	96408	97631	+	408	K03346	dnaB2, dnaB; replication initiation and membrane attachment protein		57.2979	37.9352	4.68617	62.7244	1.33174	32.9911	0.66207		1.09471		0.0232424	Suc
H3lac	H_contig_185	100727	102166	+	480	K03977	engA; GTP-binding protein		56.5198	26.5125	1.99162	68.6953	0	32.6367	0.469084		1.21542		ZERO	Suc
H3lac	H_contig_185	103820	104293	+	158	K09748	rimP; ribosome maturation factor RimP		87.6795	30.4762	8.06732	99.675	0	34.7577	0.347587		1.13681		ZERO	Suc
H3lac	H_contig_185	104335	105432	+	366	K02600	nusA; N utilization substance protein A		105.667	61.0833	12.1892	178.84	0	34.4063	0.578076		1.69249		ZERO	Suc
H3lac	H_contig_185	105556	105882	+	109	K07742	K07742; hypothetical protein		161.517	75.7313	20.4644	225.755	0	30.9213	0.468876		1.39772		ZERO	Suc
H3lac	H_contig_185	105892	106209	+	106	K07742	K07742; hypothetical protein		141.583	58.406	15.0311	171.787	0	28.7206	0.412521		1.21333		ZERO	Suc
H3lac	H_contig_185	106349	109036	+	896	K02519	infB, MTIF2; translation initiation factor IF-2		169.431	86.3704	34.8534	213.666	3.63851	33.4891	0.509769		1.26108		0.021475	Suc
H3lac	H_contig_185	109190	109540	+	117	K02834	rbfA; ribosome-binding factor A		111.004	64.6736	21.7887	151.429	0	30.5353	0.582622		1.36417		ZERO	Suc
H3lac	H_contig_185	111905	113872	+	656	K01972	E6.5.1.2, ligA, ligB; DNA ligase (NAD+) [EC:6.5.1.2]		58.9542	49.285	34.0033	71.2711	4.96968	33.7688	0.835987		1.20892		0.0842972	Suc
H3lac	H_contig_185	113869	114876	+	336	K07029	K07029		66.1402	57.3244	44.5744	106.924	0	33.9729	0.86671		1.61663		ZERO	Suc
H3lac	H_contig_203	3	338	-	112	K02884	RP-L19, MRPL19, rplS; large subunit ribosomal protein L19		1249.79	386.939	42.6776	1300.67	9.7027	29.9617	0.309603		1.04071		0.00776346	Suc
H3lac	H_contig_203	5228	6226	-	333	K01000	mraY; phospho-N-acetylmuramoyl-pentapeptide-transferase [EC:2.7.8.13]		62.4025	26.8547	0.956935	78.3295	0	28.7469	0.430346		1.25523		ZERO	Suc
H3lac	H_contig_203	6361	8667	-	769	K12556	pbp2X; penicillin-binding protein 2X [EC:2.3.2.-]		82.5677	36.6757	5.38696	91.5173	1.41314	32.9769	0.444189		1.10839		0.0171149	Suc
H3lac	H_contig_203	8668	9048	-	127				88.6288	43.3318	17.5639	120.13	0	34.0284	0.488913		1.35543		ZERO	Suc
H3lac	H_contig_203	9148	10095	-	316	K03438	mraW, rsmH; 16S rRNA (cytosine1402-N4)-methyltransferase [EC:2.1.1.199]		161.659	107.755	26.2188	180.661	3.43893	33.608	0.666559		1.11754		0.0212727	Suc
H3lac	H_contig_203	10333	11574	-	414	K00147	proA; glutamate-5-semialdehyde dehydrogenase [EC:1.2.1.41]		89.2326	73.1093	7.69708	115.309	2.62489	32.4603	0.819312		1.29223		0.0294162	Suc
H3lac	H_contig_203	11589	12758	-	390	K05363	murM; serine/alanine adding enzyme [EC:2.3.2.10]		81.4033	73.1988	6.5366	108.524	2.78642	34.7085	0.899212		1.33317		0.0342298	Suc
H3lac	H_contig_203	14884	16554	-	557	K03631	recN; DNA repair protein RecN (Recombination protein N)		73.0597	33.3449	16.5909	68.0345	1.95099	35.0796	0.456406		0.931218		0.0267041	Suc
H3lac	H_contig_203	16600	17034	-	145	K03402	argR, ahrC; transcriptional regulator of arginine metabolism		57.7223	18.9763	10.9883	74.6704	3.74725	30.4552	0.328752		1.29361		0.0649186	Suc
H3lac	H_contig_203	17021	17842	-	274	K06442	tlyA; 23S rRNA (cytidine1920-2'-O)/16S rRNA (cytidine1409-2'-O)-methyltransferase [EC:2.1.1.226 2.1.1.227]		73.7329	41.4242	10.4669	66.4576	1.98303	32.6414	0.561814		0.901329		0.0268948	Suc
H3lac	H_contig_203	17835	18707	-	291	K13789	GGPS; geranylgeranyl diphosphate synthase, type II [EC:2.5.1.1 2.5.1.10 2.5.1.29]		89.2613	52.0056	13.1406	113.312	0	31.5442	0.582622		1.26944		ZERO	Suc
H3lac	H_contig_203	18908	20236	-	443	K03601	xseA; exodeoxyribonuclease VII large subunit [EC:3.1.11.6]		54.074	41.1493	6.47389	79.9875	1.22653	34.7409	0.760982		1.47922		0.0226824	Suc
H3lac	H_contig_203	20288	21136	-	283	K01491	folD; methylenetetrahydrofolate dehydrogenase (NADP+) / methenyltetrahydrofolate cyclohydrolase [EC:1.5.1.5 3.5.4.9]		118.3	83.8597	0	203.467	3.83994	31.3319	0.708872		1.71992		0.0324593	Suc
H3lac	H_contig_203	21902	22249	-	116	K07171	K07171; mRNA interferase [EC:3.1.-.-]		77.129	80.0564	52.1942	93.3379	4.68406	28.6009	1.03796		1.21015		0.0607303	Suc
H3lac	H_contig_203	22250	23359	-	370	K01775	alr; alanine racemase [EC:5.1.1.1]		92.0437	135.719	62.8706	143.653	5.87407	32.183	1.47451		1.56071		0.0638182	Suc
H3lac	H_contig_203	23363	23728	-	122	K00997	acpS; holo-[acyl-carrier protein] synthase [EC:2.7.8.7]		94.6268	109.95	70.523	104.883	4.4537	30.685	1.16193		1.10839		0.047066	Suc
H3lac	H_contig_203	25292	26710	-	473	K01439	dapE; succinyl-diaminopimelate desuccinylase [EC:3.5.1.18]		111.662	104.711	83.5386	156.072	4.59494	32.3458	0.937752		1.39772		0.0411506	Suc
H3lac	H_contig_203	26707	27405	-	233				79.2753	103.331	82.0582	141.518	2.33198	34.2206	1.30345		1.78515		0.0294162	Suc
H3lac	H_contig_203	29529	30770	-	414	K02945	RP-S1, rpsA; small subunit ribosomal protein S1		738.26	304.899	30.7883	1105.54	5.24977	33.1214	0.412997		1.4975		0.007111	Suc
H3lac	H_contig_203	30899	31672	-	258	K01695	trpA; tryptophan synthase alpha chain [EC:4.2.1.20]		186.815	147.977	48.1694	278.501	4.21203	31.5124	0.792106		1.49079		0.0225466	Suc
H3lac	H_contig_203	31674	32873	-	400	K01696	trpB; tryptophan synthase beta chain [EC:4.2.1.20]		154.407	121.241	20.7129	255.916	4.07513	28.7754	0.785203		1.65741		0.0263921	Suc
H3lac	H_contig_203	32870	33943	-	358	K01817	trpF; phosphoribosylanthranilate isomerase [EC:5.3.1.24]		119.314	108.564	22.2527	214.454	3.03548	30.1394	0.909899		1.79739		0.0254411	Suc
H3lac	H_contig_203	33933	34703	-	257	K01609	trpC; indole-3-glycerol phosphate synthase [EC:4.1.1.48]		69.6262	76.2838	8.67944	103.408	4.22841	32.022	1.09562		1.48519		0.0607303	Suc
H3lac	H_contig_203	34961	35218	-	86				107.39	87.9862	22.232	131.62	6.31804	26.3968	0.819312		1.22562		0.0588324	Suc
H3lac	H_contig_203	35249	35527	-	93	K04782	pchB; isochorismate pyruvate lyase [EC:4.2.99.21]		133.444	107.252	17.1322	216.967	0	32.1817	0.803723		1.6259		ZERO	Suc
H3lac	H_contig_203	35527	36531	-	335	K00766	trpD; anthranilate phosphoribosyltransferase [EC:2.4.2.18]		106.829	90.35	6.65855	179.229	4.86583	25.8651	0.845741		1.67771		0.0455477	Suc
H3lac	H_contig_203	36589	37146	-	186	K01658	trpG; anthranilate synthase component II [EC:4.1.3.27]		54.3086	48.0785	1.71322	161.403	2.92124	29.1263	0.885283		2.97195		0.0537897	Suc
H3lac	H_contig_203	37130	38506	-	459	K01657	trpE; anthranilate synthase component I [EC:4.1.3.27]		57.2193	50.2057	2.08274	111.51	3.55132	32.4594	0.877425		1.94882		0.062065	Suc
H3lac	H_contig_203	47005	49107	-	701	K04759	feoB; ferrous iron transport protein B		76.9906	43.1773	21.3652	234.489	3.87554	33.7207	0.560813		3.04568		0.0503379	Suc
H3lac	H_contig_203	49844	50203	-	120	K02887	RP-L20, MRPL20, rplT; large subunit ribosomal protein L20		644.566	209.234	50.4544	713.611	18.1117	34.2903	0.324612		1.10712		0.0280991	Suc
H3lac	H_contig_203	50263	50463	-	67	K02916	RP-L35, MRPL35, rpmI; large subunit ribosomal protein L35		715.068	205.341	23.7805	705.164	8.10972	25.6142	0.287163		0.98615		0.0113412	Suc
H3lac	H_contig_203	50492	50992	-	167	K02520	infC, MTIF3; translation initiation factor IF-3		347.371	111.216	15.2651	374.266	0	31.6315	0.320165		1.07743		ZERO	Suc
H3lac	H_contig_203	54174	55298	-	375	K00566	mnmA, trmU, TRMU; tRNA-specific 2-thiouridylase [EC:2.8.1.-]		238.586	110.063	12.7464	309.724	2.89787	32.7054	0.461314		1.29817		0.0121461	Suc
H3lac	H_contig_203	55459	55941	-	161	K00794	ribH, RIB4; 6,7-dimethyl-8-ribityllumazine synthase [EC:2.5.1.78]		112.935	38.4536	3.9585	85.5905	0	29.3913	0.340493		0.757874		ZERO	Suc
H3lac	H_contig_203	55985	57184	-	400	K14652	ribBA; 3,4-dihydroxy 2-butanone 4-phosphate synthase / GTP cyclohydrolase II [EC:4.1.99.12 3.5.4.25]		142.863	51.5919	9.55978	187.015	1.35838	32.2259	0.361129		1.30906		0.00950827	Suc
H3lac	H_contig_203	57177	57776	-	200	K00793	ribE, RIB5; riboflavin synthase [EC:2.5.1.9]		152.964	48.1525	11.1531	140.261	0	32.0501	0.314796		0.916956		ZERO	Suc
H3lac	H_contig_203	57757	58842	-	362	K11752	ribD; diaminohydroxyphosphoribosylaminopyrimidine deaminase / 5-amino-6-(5-phosphoribosylamino)uracil reductase [EC:3.5.4.26 1.1.1.193]		96.4696	17.1023	3.5211	137.311	0	32.5405	0.177282	SP	1.42336		ZERO	Suc
H3lac	H_contig_203	59573	60118	+	182	K03523	bioY; biotin transport system substrate-specific component		3.17156	5.66944	0	183.879	0	33.8804	1.78759		57.9774	OC	ZERO
H3lac	H_contig_203	60111	60416	+	102			na (3)	0	6.74404	0	164.049	0	30.7566	∞		∞	OC	∞
H3lac	H_contig_203	60545	61483	+	313	K03524	birA; BirA family transcriptional regulator, biotin operon repressor / biotin-[acetyl-CoA-carboxylase] ligase [EC:6.3.4.15]		44.2599	36.2627	9.16273	248.431	0	32.9296	0.819312		5.61301	OC	ZERO
H3lac	H_contig_208	3	143	-	47	K02913	RP-L33, MRPL33, rpmG; large subunit ribosomal protein L33		429.847	146.36	6.77998	502.617	0	31.9085	0.340493		1.16929		ZERO	Suc
H3lac	H_contig_208	162	329	-	56	K02911	RP-L32, MRPL32, rpmF; large subunit ribosomal protein L32		654.53	257.96	17.071	957.926	0	26.309	0.394114		1.46353		ZERO	Suc
H3lac	H_contig_208	1772	4435	-	888	K01873	VARS, valS; valyl-tRNA synthetase [EC:6.1.1.9]		90.0286	61.9723	38.397	116.94	8.56635	37.8986	0.688362		1.29892		0.0951514	Suc
H3lac	H_contig_208	9966	10220	-	85	K01785	E5.1.3.3, galM; aldose 1-epimerase [EC:5.1.3.3]		50.9315	32.3714	0	28.9497	0	35.5444	0.635588		0.568406		ZERO	Suc
H3lac	H_contig_208	10267	10764	-	166	K00680	E2.3.1.-		60.8519	43.5113	1.91963	59.2946	3.2732	35.9391	0.715036		0.97441		0.0537897	Suc
H3lac	H_contig_208	10761	12098	-	446	K00599	E2.1.1.-		60.1814	50.1267	7.14483	76.1391	0	37.0616	0.832927		1.26516		ZERO	Suc
H3lac	H_contig_208	15094	15405	+	104				99.904	128.98	113.369	179.822	15.6736	35.7571	1.29104		1.79995		0.156887	Suc
H3lac	H_contig_208	15872	16117	-	82	K02963	RP-S18, MRPS18, rpsR; small subunit ribosomal protein S18		686.333	226.501	50.5192	600.177	13.2525	33.8417	0.330017		0.87447		0.0193091	Suc
H3lac	H_contig_208	16165	16674	-	170	K03111	ssb; single-strand DNA-binding protein		1460.04	459.269	67.4808	1456.17	25.5695	33.852	0.31456		0.997354		0.0175129	Suc
H3lac	H_contig_208	16711	17010	-	100	K02990	RP-S6, MRPS6, rpsF; small subunit ribosomal protein S6		418.487	113.502	19.1196	452.774	0	36.6622	0.271221		1.08193		ZERO	Suc
H3lac	H_contig_208	17470	18306	-	279	K06153	E3.6.1.27, bacA; undecaprenyl-diphosphatase [EC:3.6.1.27]		83.7905	67.803	10.2793	127.005	1.9475	40.1188	0.809197		1.51575		0.0232424	Suc
H3lac	H_contig_208	18574	20169	+	532	K17074	lysX2; putative lysine transport system permease protein		145.933	75.6423	7.78679	185.942	1.02134	37.7094	0.518335		1.27416		0.00699865	Suc
H3lac	H_contig_208	20166	20903	+	246	K02028	ABC.PA.A; polar amino acid transport system ATP-binding protein [EC:3.6.3.21]		154.865	88.0838	18.1351	212.063	0	36.0773	0.568779		1.36934		ZERO	Suc
H3lac	H_contig_208	21686	23326	-	547	K02343	DPO3G, dnaX; DNA polymerase III subunit gamma/tau [EC:2.7.7.7]		107.108	92.4316	75.7325	135.857	16.8866	38.5375	0.862974		1.26841		0.157659	Suc
H3lac	H_contig_208	23323	23823	-	167	K07170	K07170; GAF domain-containing protein		89.8671	65.9059	51.5198	141.455	0	39.7831	0.73337		1.57405		ZERO	Suc
H3lac	H_contig_208	24372	25589	+	406	K03281	TC.CIC; chloride channel protein, CIC family		75.3518	41.5107	14.1278	65.4578	1.3383	36.6804	0.550893		0.868695		0.0177607	Suc
H3lac	H_contig_208	26120	28228	-	703	K01915	glnA; glutamine synthetase [EC:6.3.1.2]		893.752	649.731	26.2905	1322.42	18.5497	40.0518	0.72697		1.47963		0.0207549	Suc
H3lac	H_contig_208	28391	29731	-	447	K01915	glnA; glutamine synthetase [EC:6.3.1.2]		61.9837	44.6284	9.98038	80.3728	3.64665	38.2325	0.720002		1.29668		0.0588324	Suc
H3lac	H_contig_208	29840	30175	-	112	K03713	glnR; MerR family transcriptional regulator, glutamine synthetase repressor		159.767	138.193	116.652	210.92	0	34.6297	0.864963		1.32017		ZERO	Suc
H3lac	H_contig_208	32327	32557	-	77				56.2231	35.7347	4.13843	44.7405	0	33.4783	0.635588		0.795768		ZERO	Suc
H3lac	H_contig_208	35170	37731	-	854	K03555	mutS; DNA mismatch repair protein MutS		57.452	36.65	9.32843	59.9334	1.90873	37.895	0.637924		1.04319		0.033223	Suc
H3lac	H_contig_208	37721	38098	-	126				158.049	111.919	32.8775	187.484	8.62462	36.8444	0.708127		1.18624		0.0545692	Suc
H3lac	H_contig_208	38079	38555	-	159	K03402	argR, ahrC; transcriptional regulator of arginine metabolism		96.2039	56.2428	18.0373	114.524	0	35.1567	0.584621		1.19043		ZERO	Suc
H3lac	H_contig_208	38614	40308	-	565	K01887	RARS, argS; arginyl-tRNA synthetase [EC:6.1.1.19]		128.726	91.9219	33.2759	163.758	5.7701	37.9123	0.71409		1.27215		0.0448247	Suc
H3lac	H_contig_210	5967	7040	+	358	K06865	K06865; ATPase		87.0672	84.5454	36.4945	123.724	1.51774	40.9948	0.971037		1.42101		0.0174318	Suc
H3lac	H_contig_210	7037	7717	+	227	K00991	ispD; 2-C-methyl-D-erythritol 4-phosphate cytidylyltransferase [EC:2.7.7.60]		136.042	96.9716	50.5363	136.587	2.39362	34.8201	0.712808		1.00401		0.0175947	Suc
H3lac	H_contig_210	7719	8543	+	275				151.128	112.564	86.9071	186.12	5.92747	34.2594	0.744829		1.23155		0.0392216	Suc
H3lac	H_contig_210	8530	9012	+	161	K01770	ispF; 2-C-methyl-D-erythritol 2,4-cyclodiphosphate synthase [EC:4.6.1.12]		121.898	104.679	96.9833	183.408	3.37485	35.6263	0.858744		1.5046		0.0276859	Suc
H3lac	H_contig_210	9299	10747	+	483	K09698	gltX1; nondiscriminating glutamyl-tRNA synthetase [EC:6.1.1.24]		127.276	84.0283	23.751	139.594	5.62475	38.1116	0.660205		1.09678		0.0441934	Suc
H3lac	H_contig_210	22524	23417	+	298	K02440	GLPF; glycerol uptake facilitator protein		664.388	292.008	13.9012	885.201	3.64665	36.8647	0.439514		1.33236		0.00548874	Suc
H3lac	H_contig_210	24463	25158	+	232				133.11	207.554	167.571	263.043	14.0522	39.0785	1.55927		1.97614		0.105568	Suc
H3lac	H_contig_210	26420	29524	+	1035	K08282	E2.7.11.1; non-specific serine/threonine protein kinase [EC:2.7.11.1]		87.0018	65.4661	23.0913	110.317	0.524977	39.7087	0.752468		1.26798		0.0060341	Suc
H3lac	H_contig_210	29660	30259	+	200				176.053	142.738	71.6983	265.759	10.867	36.0001	0.810765		1.50954		0.0617258	Suc
H3lac	H_contig_210	30495	31829	+	445	K01924	murC; UDP-N-acetylmuramate--alanine ligase [EC:6.3.2.8]		167.33	128.304	52.9905	199.07	6.10507	37.2349	0.76677		1.18969		0.0364852	Suc
H3lac	H_contig_210	33897	35090	+	398	K00925	ackA; acetate kinase [EC:2.7.2.1]		55.8369	64.814	8.00651	87.7948	0	38.139	1.16077		1.57234		ZERO	Suc
H3lac	H_contig_210	35317	36036	+	240	K09903	pyrH; uridylate kinase [EC:2.7.4.22]		145.508	85.9866	3.98324	145.593	2.26396	33.0653	0.590939		1.00058		0.015559	Suc
H3lac	H_contig_210	36067	36624	+	186	K02838	frr, MRRF, RRF; ribosome recycling factor		172.236	109.101	13.7058	214.321	5.84249	35.9089	0.63344		1.24435		0.0339214	Suc
H3lac	H_contig_210	36753	37643	+	297	K00243	K00243; hypothetical protein		65.1077	40.5324	4.29171	102.737	0	37.2772	0.622544		1.57796		ZERO	Suc
H3lac	H_contig_210	37640	38161	+	174	K07304	msrA; peptide-methionine (S)-S-oxide reductase [EC:1.8.4.11]		81.2757	67.2079	7.3255	82.0243	0	33.0629	0.826912		1.00921		ZERO	Suc
H3lac	H_contig_210	38146	38367	+	74	K01286	E3.4.16.4; D-alanyl-D-alanine carboxypeptidase [EC:3.4.16.4]		54.6022	32.5355	25.8372	39.9037	0	35.1362	0.595863		0.730807		ZERO	Suc
H3lac	H_contig_210	39258	39683	+	142	K02867	RP-L11, MRPL11, rplK; large subunit ribosomal protein L11		573.158	213.15	11.2204	696.629	19.1321	35.235	0.371886		1.21542		0.0333801	Suc
H3lac	H_contig_210	39857	40543	+	229	K02863	RP-L1, MRPL1, rplA; large subunit ribosomal protein L1		707.036	229.798	11.1322	797.319	9.49085	39.5344	0.325016		1.12769		0.0134234	Suc
H3lac	H_contig_210	46228	47253	+	342	K01992	ABC-2.P; ABC-2 type transport system permease protein		52.3214	39.2219	30.7478	76.2682	1.58875	37.2695	0.749635		1.45769		0.0303651	Suc
H3lac	H_contig_210	47278	47664	-	129	K01579	panD; aspartate 1-decarboxylase [EC:4.1.1.11]		73.8309	50.6587	9.88091	72.4865	0	33.9383	0.686146		0.981792		ZERO	Suc
H3lac	H_contig_210	49820	50458	+	213	K01674	cah; carbonic anhydrase [EC:4.2.1.1]		104.334	80.7385	8.97632	189.464	5.10189	35.7452	0.773848		1.81595		0.0488997	Suc
H3lac	H_contig_210	50498	50956	+	153	K01808	rpiB; ribose 5-phosphate isomerase B [EC:5.3.1.6]		96.2039	44.9603	6.24822	144.749	7.10263	33.8187	0.467344		1.5046		0.0738289	Suc
H3lac	H_contig_210	60984	61742	+	253	K01803	TPI, tpiA; triosephosphate isomerase (TIM) [EC:5.3.1.1]		581.786	311.319	37.7857	830.617	17.1811	36.738	0.535109		1.4277		0.0295316	Suc
H3lac	H_contig_210	61866	62156	-	97				1044.36	343.946	85.4138	1014.73	89.625	37.5737	0.329338		0.971634		0.0858183	Suc
H3lac	H_contig_210	63445	64536	+	364	K00540	E1.-.-.-		57.088	50.0801	15.7579	68.9545	2.98545	35.3132	0.877243		1.20786		0.0522955	Suc
H3lac	H_contig_210	64637	65923	+	429	K08303	K08303; putative protease [EC:3.4.-.-]		84.0943	54.5183	14.1131	120.455	0	37.5661	0.648299		1.43238		ZERO	Suc
H3lac	H_contig_210	68877	69008	+	44				13.1187	7.81696	0	145.407	0	32.0902	0.595863		11.0839	OC	ZERO
H3lac	H_contig_210	69103	69720	-	206	K03523	bioY; biotin transport system substrate-specific component		29.4216	6.67857	3.09378	183.957	0	35.2735	0.226996		6.25246	OC	ZERO
H3lac	H_contig_210	71536	72096	-	187	K16789	thiT; thiamine transporter		199.096	251.982	18.7447	1379.06	11.6225	36.807	1.26563		6.92662	OC	0.0583764	Suc
H3lac	H_contig_210	73304	74131	+	276	K02073	metQ; D-methionine transport system substrate-binding protein		282.337	176.958	42.7188	452.917	11.812	41.1195	0.62676		1.60417		0.0418364	Suc
H3lac	H_contig_210	74259	75311	+	351	K02071	metN; D-methionine transport system ATP-binding protein		100.315	58.7942	11.8022	136.006	1.54801	36.649	0.586095		1.35579		0.0154315	Suc
H3lac	H_contig_210	75304	75981	+	226	K02072	metI; D-methionine transport system permease protein		140.475	79.1381	12.69	215.586	2.40421	35.3784	0.563362		1.5347		0.0171149	Suc
H3lac	H_contig_210	76158	76601	+	148	K07305	msrB; peptide-methionine (R)-S-oxide reductase [EC:1.8.4.12]		99.454	81.3386	8.61241	152.964	0	36.5008	0.817852		1.53804		ZERO	Suc
H3lac	H_contig_210	76747	77028	+	94	K07729	K07729; putative transcriptional regulator		322.385	340.287	233.909	602.093	11.5607	36.8563	1.05553		1.86762		0.0358598	Suc
H3lac	H_contig_210	77053	77433	+	127				290.884	300.614	198.221	399.142	8.55671	34.7193	1.03345		1.37217		0.0294162	Suc
H3lac	H_contig_210	78621	79316	+	232	K01834	PGAM, gpmA; 2,3-bisphosphoglycerate-dependent phosphoglycerate mutase [EC:5.4.2.11]		767.558	329.121	13.7353	984.291	11.7102	36.9422	0.42879		1.28237		0.0152564	Suc
H3lac	H_contig_210	81653	83767	+	705	K00687	pbp2B, penA; penicillin-binding protein 2B [EC:2.3.2.-]		74.0975	40.9808	5.42399	94.9387	0	37.0927	0.553067		1.28127		ZERO	Suc
H3lac	H_contig_210	83777	84391	+	205	K06187	recR; recombination protein RecR		64.7616	33.5557	6.21774	74.422	0	34.2037	0.518142		1.14917		ZERO	Suc
H3lac	H_contig_210	84734	85783	+	350	K01921	ddl; D-alanine-D-alanine ligase [EC:6.3.2.4]		55.2485	44.2217	11.8359	78.7433	3.10486	34.5365	0.800413		1.42526		0.0561982	Suc
H3lac	H_contig_210	85798	86571	+	258	K03481	glvR; RpiR family transcriptional regulator, glv operon transcriptional regulator		61.5257	49.3256	11.116	76.3016	2.10601	41.0827	0.801707		1.24016		0.0342298	Suc
H3lac	H_contig_210	94979	96535	+	519	K02837	prfC; peptide chain release factor 3		58.9457	27.8338	4.29791	68.2745	0	35.1358	0.472194		1.15826		ZERO	Suc
H3lac	H_contig_210	96966	98531	+	522	K05592	deaD; ATP-dependent RNA helicase DeaD [EC:3.6.4.13]		81.8286	12.5191	0.610458	90.5095	1.0409	37.347	0.152992	SP	1.10609		0.0127205	Suc
H3lac	H_contig_210	98702	99601	+	300	K03595	era; GTP-binding protein Era		65.4186	49.299	1.0622	68.9004	0	37.9354	0.753592		1.05322		ZERO	Suc
H3lac	H_contig_210	99617	101245	+	543	K03328	TC.PST; polysaccharide transporter, PST family		80.2585	42.439	2.93425	102.417	1.00065	34.3812	0.528779		1.27609		0.0124678	Suc
H3lac	H_contig_210	101276	101419	+	48				96.2039	7.16555	0	51.2652	0	29.5136	0.0744829	SP	0.53288		ZERO	Suc
H3lac	H_contig_210	101416	102015	+	200	K04068	nrdG; anaerobic ribonucleoside-triphosphate reductase activating protein [EC:1.97.1.4]		67.8237	24.0762	4.77989	54.136	0	35.1907	0.354982		0.798187		ZERO	Suc
H3lac	H_contig_210	103096	104127	+	344	K00100	E1.1.1.-		63.763	50.992	26.8637	80.1167	1.57951	37.9507	0.799711		1.25648		0.0247716	Suc
H3lac	H_contig_210	104120	106003	+	628	K07386	pepO; putative endopeptidase [EC:3.4.24.-]		82.7231	74.4852	32.4748	95.6079	6.05646	36.6551	0.900416		1.15576		0.0732137	Suc
H3lac	H_contig_210	106932	107531	+	200	K03700	recU; recombination protein U		54.8362	32.6749	1.5933	83.6647	0	36.6847	0.595863		1.52572		ZERO	Suc
H3lac	H_contig_210	107554	109527	+	658	K05366	mrcA; penicillin-binding protein 1A [EC:2.4.1.- 3.4.-.-]		77.6357	54.3623	10.17	100.972	0	38.0512	0.700224		1.30059		ZERO	Suc
H3lac	H_contig_210	114370	114927	+	186	K02356	efp; elongation factor P		260.682	192.314	68.5289	296.346	5.84249	36.919	0.737736		1.13681		0.0224124	Suc
H3lac	H_contig_210	115019	115429	+	137				219.092	193.313	109.321	352.046	11.8982	35.6842	0.882336		1.60684		0.0543069	Suc
H3lac	H_contig_210	115419	116036	+	206	K03625	nusB; N utilization substance protein B		236.774	176.982	75.7976	346.413	13.1881	36.8549	0.747474		1.46306		0.0556994	Suc
H3lac	H_contig_210	117458	118402	+	315	K01809	E5.3.1.8, manA; mannose-6-phosphate isomerase [EC:5.3.1.8]		78.7956	85.1676	102.173	114.053	1.72492	35.2675	1.08087		1.44745		0.0218911	Suc
H3lac	H_contig_210	118405	120186	+	594	K01200	E3.2.1.41; pullulanase [EC:3.2.1.41]		56.8478	75.8535	69.7402	106.052	2.7442	38.9446	1.33433		1.86554		0.0482728	Suc
H3lac	H_contig_210	120314	122524	+	737	K00700	glgB; 1,4-alpha-glucan branching enzyme [EC:2.4.1.18]		339.128	411.149	207.107	628.37	23.5919	36.314	1.21237		1.8529		0.0695663	Suc
H3lac	H_contig_210	122591	123754	+	388	K00975	glgC; glucose-1-phosphate adenylyltransferase [EC:2.7.7.27]		560.859	915.712	700.558	1142.84	75.6211	37.1361	1.6327		2.03767		0.134831	Suc
H3lac	H_contig_210	123741	124889	+	383	K00975	glgC; glucose-1-phosphate adenylyltransferase [EC:2.7.7.27]		518.446	822.597	599.046	1071.67	43.9788	37.5151	1.58666		2.06708		0.0848282	Suc
H3lac	H_contig_210	124886	126325	+	480	K00703	E2.4.1.21, glgA; starch synthase [EC:2.4.1.21]		597.065	882.079	714.992	1182.17	43.0153	35.8844	1.47736		1.97998		0.0720446	Suc
H3lac	H_contig_210	126449	128839	+	797	K00688	E2.4.1.1, glgP, PYG; starch phosphorylase [EC:2.4.1.1]		622.127	900.216	732.876	1209.68	69.5381	36.736	1.447		1.94442		0.111775	Suc
H3lac	H_contig_2239	419	1102	+	228				75.9504	156.888	213.837	166.207	14.2987	39.9399	2.06566		2.18836		0.188264	Suc
H3lac	H_contig_2239	3220	3396	-	59				68.4841	58.296	54.01	83.4145	0	32.9002	0.851233		1.21801		ZERO	Suc
H3lac	H_contig_2239	5263	5637	-	125	K02759	PTS-Cel-EIIA, celC; PTS system, cellobiose-specific IIA component [EC:2.7.1.69]		76.1935	118.317	135.112	66.9318	4.34681	39.549	1.55286		0.878445		0.0570496	Suc
H3lac	H_contig_2239	7469	7666	+	66	K03704	cspA; cold shock protein (beta-ribbon, CspA family)		406.68	166.762	0	566.713	0	34.9862	0.410056		1.39351		ZERO	Suc
H3lac	H_contig_2289	804	2144	+	447	K05592	deaD; ATP-dependent RNA helicase DeaD [EC:3.6.4.13]		129.778	64.6342	12.119	144.231	1.21555	35.3735	0.498035		1.11136		0.00936636	Suc
H3lac	H_contig_2310	1	1905	-	635	K06147	ABCB-BAC; ATP-binding cassette, subfamily B, bacterial		86.8108	50.3732	3.01095	105.404	1.71134	36.6882	0.580265		1.21419		0.0197135	Suc
H3lac	H_contig_2310	1905	3611	-	569	K06147	ABCB-BAC; ATP-binding cassette, subfamily B, bacterial		58.331	36.873	1.6801	75.249	0	37.4555	0.632133		1.29003		ZERO	Suc
H3lac	H_contig_2310	5604	6950	-	449	K01810	GPI, pgi; glucose-6-phosphate isomerase [EC:5.3.1.9]		367.032	276.536	22.7107	484.473	6.05068	38.119	0.753438		1.31998		0.0164854	Suc
H3lac	H_contig_234	37	243	+	69				54.3761	24.9236	4.61825	114.121	0	34.0616	0.458356		2.09873		ZERO	Suc
H3lac	H_contig_234	295	1410	+	372	K06942	K06942		85.3422	41.6064	4.28305	128.328	0	42.8958	0.487525		1.50369		ZERO	Suc
H3lac	H_contig_234	14280	15422	-	381	K02338	DPO3B, dnaN; DNA polymerase III subunit beta [EC:2.7.7.7]		68.176	65.9005	23.4185	108.505	5.70448	45.5078	0.966623		1.59154		0.0836728	Suc
H3lac	H_contig_234	33945	34691	-	249				104.317	71.8281	40.9522	162.072	2.18213	45.9358	0.688553		1.55364		0.0209182	Suc
H3lac	H_contig_234	34892	35257	+	122	K03210	yajC; preprotein translocase subunit YajC		359.582	262.189	94.0306	346.922	17.8148	39.2964	0.729149		0.964794		0.0495431	Suc
H3lac	H_contig_234	36202	36996	+	265	K00981	E2.7.7.41, CDS1, CDS2, cdsA; phosphatidate cytidylyltransferase [EC:2.7.7.41]		65.346	46.7248	8.41741	83.5719	2.05038	43.6323	0.715036		1.27891		0.0313773	Suc
H3lac	H_contig_234	37100	38272	+	391	K00099	dxr; 1-deoxy-D-xylulose-5-phosphate reductoisomerase [EC:1.1.1.267]		91.529	66.854	38.3043	125.868	4.16894	42.0901	0.730413		1.37518		0.0455477	Suc
H3lac	H_contig_234	38236	39519	+	428	K11749	rseP; regulator of sigma E protease [EC:3.4.24.-]		91.0341	77.9504	35.7375	106.938	1.26951	41.1069	0.856278		1.17471		0.0139455	Suc
H3lac	H_contig_234	45271	47124	+	618	K01881	PARS, proS; prolyl-tRNA synthetase [EC:6.1.1.15]		188.672	138.024	23.719	242.091	6.15446	43.0866	0.731555		1.28313		0.03262	Suc
H3lac	H_contig_2353	287	1030	+	248				61.6791	65.1834	7.7095	71.4405	0	62.2908	1.05681		1.15826		ZERO	Suc
H3lac	H_contig_2353	1024	1866	+	281				58.544	72.2165	6.80411	87.5704	0	71.7635	1.23354		1.4958		ZERO	Suc
H3lac	H_contig_2448	1526	2539	+	338	K00134	GAPDH, gapA; glyceraldehyde 3-phosphate dehydrogenase [EC:1.2.1.12]		3786.96	4011.35	3444.91	5553.38	364.913	40.2982	1.05925		1.46645		0.0963605	Suc
H3lac	H_contig_2448	2798	3145	+	116	K06193	phnA; phosphonoacetate hydrolase [EC:3.11.1.2]		69.6649	77.0914	5.49413	101.823	0	39.0333	1.1066		1.46161		ZERO	Suc
H3lac	H_contig_2448	3210	3536	+	109				272.725	454.388	438.522	546.327	24.9244	38.4659	1.6661		2.00322		0.0913902	Suc
H3lac	H_contig_2496	3	347	-	115	K02996	RP-S9, MRPS9, rpsI; small subunit ribosomal protein S9		732.823	331.983	77.5866	1014.25	37.7984	34.6602	0.453019		1.38403		0.0515791	Suc
H3lac	H_contig_2496	361	807	-	149	K02871	RP-L13, MRPL13, rplM; large subunit ribosomal protein L13		674.073	277.004	40.6344	782.809	0	39.6136	0.41094		1.16131		ZERO	Suc
H3lac	H_contig_2496	978	1856	+	293	K03471	rnhC; ribonuclease HIII [EC:3.1.26.4]		73.8767	64.5633	15.226	78.9448	0	40.6805	0.873933		1.0686		ZERO	Suc
H3lac	H_contig_2496	1853	2446	+	198	K03100	lepB; signal peptidase I [EC:3.4.21.89]		87.4581	66.0099	27.3596	134.222	0	38.9887	0.75476		1.5347		ZERO	Suc
H3lac	H_contig_2496	2526	2840	-	105	K01523	hisE; phosphoribosyl-ATP pyrophosphohydrolase [EC:3.6.1.31]		269.371	337.395	333.834	529.642	25.8739	33.8753	1.25253		1.96622		0.096053	Suc
H3lac	H_contig_2496	2837	3187	-	117	K01496	hisI; phosphoribosyl-AMP cyclohydrolase [EC:3.5.4.19]		300.945	358.645	318.659	567.86	13.9321	32.4726	1.19173		1.88692		0.0462944	Suc
H3lac	H_contig_2496	3184	3945	-	254	K02500	hisF; cyclase [EC:4.1.3.-]		261.341	308.739	249.658	480.52	17.1134	33.6417	1.18136		1.83867		0.0654831	Suc
H3lac	H_contig_2496	3947	4660	-	238	K01814	hisA; phosphoribosylformimino-5-aminoimidazole carboxamide ribotide isomerase [EC:5.3.1.16]		246.169	307.817	220.919	428.043	20.5469	37.0183	1.25043		1.73882		0.0834667	Suc
H3lac	H_contig_2496	4638	5264	-	209	K02501	hisH; glutamine amidotransferase [EC:2.4.2.-]		285.85	314.324	234.802	442.695	10.3991	35.9541	1.09961		1.5487		0.0363795	Suc
H3lac	H_contig_2496	5266	5850	-	195	K01693	E4.2.1.19, hisB; imidazoleglycerol-phosphate dehydratase [EC:4.2.1.19]		298.972	271.629	243.488	459.336	11.1457	39.7588	0.908544		1.53638		0.03728	Suc
H3lac	H_contig_2496	5847	6500	-	218	K01079	serB, PSPH; phosphoserine phosphatase [EC:3.1.3.3]		238.303	220.883	157.868	340.89	4.98487	35.993	0.926899		1.43049		0.0209182	Suc
H3lac	H_contig_2496	6515	8197	-	561				164.627	182.702	103.948	278.093	5.81124	44.9152	1.1098		1.68923		0.0352995	Suc
H3lac	H_contig_2496	8181	8906	-	242	K01990	ABC-2.A; ABC-2 type transport system ATP-binding protein		129.995	217.454	118.51	266.409	4.49051	41.2018	1.67279		2.04939		0.0345438	Suc
H3lac	H_contig_2496	8943	10238	-	432	K00013	hisD; histidinol dehydrogenase [EC:1.1.1.23]		144.974	251.59	165.968	269.997	10.0621	38.6719	1.73542		1.86238		0.069406	Suc
H3lac	H_contig_2496	10231	10872	-	214	K00765	hisG; ATP phosphoribosyltransferase [EC:2.4.2.17]		152.398	196.081	108.702	186.279	2.53902	39.4741	1.28664		1.22232		0.0166605	Suc
H3lac	H_contig_2496	10869	11828	-	320	K01892	HARS, hisS; histidyl-tRNA synthetase [EC:6.1.1.21]		127.17	156.925	88.6271	189.168	0	38.6427	1.23399		1.48753		ZERO	Suc
H3lac	H_contig_2496	11825	12874	-	350	K00817	hisC; histidinol-phosphate aminotransferase [EC:2.6.1.9]		75.039	123.821	52.8064	137.801	1.55243	40.69	1.65008		1.83639		0.0206883	Suc
H3lac	H_contig_2496	17966	18883	-	306	K07139	K07139		51.8746	10.1161	8.33096	59.5078	1.77566	36.9881	0.19501	SP	1.14715		0.0342298	Suc
H3lac	H_contig_274	3052	3813	+	254	K02028	ABC.PA.A; polar amino acid transport system ATP-binding protein [EC:3.6.3.21]		62.4947	41.9777	1.25456	56.1898	2.13918	31.8095	0.6717		0.899114		0.0342298	Suc
H3lac	H_contig_274	5382	5630	+	83	K03075	secG; preprotein translocase subunit SecG		146.044	74.5907	38.3927	160.096	13.0928	28.6596	0.51074		1.09621		0.0896494	Suc
H3lac	H_contig_274	5837	8134	+	766	K12573	rnr, vacB; ribonuclease R [EC:3.1.-.-]		89.2963	58.3721	8.32009	125.928	1.41867	31.739	0.65369		1.41022		0.0158872	Suc
H3lac	H_contig_274	8148	8618	+	157	K03664	smpB; SsrA-binding protein		75.3699	52.5778	12.1781	131.657	0	32.4486	0.697596		1.74681		ZERO	Suc
H3lac	H_contig_274	11612	12679	+	356	K02015	ABC.FEV.P; iron complex transport system permease protein		12.9713	5.79685	0	69.1216	0	31.9443	0.446897		5.3288	OC	ZERO
H3lac	H_contig_274	12682	13443	+	254	K02013	ABC.FEV.A; iron complex transport system ATP-binding protein [EC:3.6.3.34]		6.8176	4.06236	0	62.0026	0	32.1065	0.595863		9.09449	OC	ZERO
H3lac	H_contig_274	13397	14584	+	396	K02016	ABC.FEV.S; iron complex transport system substrate-binding protein		8.74581	13.0283	0	83.267	1.3721	33.9367	1.48966		9.5208	OC	0.156887
H3lac	H_contig_274	14597	15610	+	338	K00384	E1.8.1.9, trxB; thioredoxin reductase (NADPH) [EC:1.8.1.9]		8.53881	10.1759	0.942779	101.924	1.60755	31.5827	1.19173		11.9365	OC	0.188264
H3lac	H_contig_274	17073	17933	+	287	K02040	pstS; phosphate transport system substrate-binding protein		73.4099	43.1431	5.55156	78.8805	0	32.2111	0.587701		1.07452		ZERO	Suc
H3lac	H_contig_274	19101	19988	+	296	K02038	pstA; phosphate transport system permease protein		65.3276	51.1271	7.53586	94.7713	0	31.9201	0.782626		1.45071		ZERO	Suc
H3lac	H_contig_274	20268	21071	+	268	K02036	pstB; phosphate transport system ATP-binding protein [EC:3.6.3.27]		67.8453	26.951	5.94514	84.4727	0	33.4697	0.397242		1.24508		ZERO	Suc
H3lac	H_contig_274	21973	22626	+	218	K02039	phoU; phosphate transport system protein		64.8714	41.0211	19.0026	85.7868	2.49244	34.8057	0.632345		1.32241		0.0384212	Suc
H3lac	H_contig_274	30552	31991	+	480	K06901	pbuG; putative MFS transporter, AGZA family, xanthine/uracil permease		235.098	124.681	3.98324	298.363	1.13198	32.3878	0.530334		1.2691		0.00481493	Suc
H3lac	H_contig_274	33602	35029	+	476	K00764	purF, PPAT; amidophosphoribosyltransferase [EC:2.4.2.14]		157.039	125.728	5.35562	238.835	0	33.1066	0.800619		1.52087		ZERO	Suc
H3lac	H_contig_284	820	2139	-	440	K01372	E3.4.22.40, pepC; bleomycin hydrolase [EC:3.4.22.40]		176.447	139.142	164.399	262.85	13.5838	39.425	0.788577		1.48969		0.0769852	Suc
H3lac	H_contig_284	2272	2838	-	189	K00969	nadD; nicotinate-nucleotide adenylyltransferase [EC:2.7.7.18]		192.408	160.144	205.695	257.791	34.4985	36.5479	0.832317		1.33981		0.179299	Suc
H3lac	H_contig_284	2835	3662	-	276	K01916	nadE; NAD+ synthase [EC:6.3.1.5]		206.002	259.206	258.622	390.507	15.7493	36.0638	1.25827		1.89565		0.0764523	Suc
H3lac	H_contig_284	3659	5098	-	480	K00763	pncB, NAPRT1; nicotinate phosphoribosyltransferase [EC:6.3.4.21]		218.263	296.654	314.676	379.362	33.9595	37.8428	1.35916		1.7381		0.15559	Suc
H3lac	H_contig_284	5102	5782	-	227	K01243	mtnN, mtn, pfs; S-adenosylhomocysteine/5'-methylthioadenosine nucleosidase [EC:3.2.2.9]		188.17	237.884	304.621	357.727	4.78724	36.3241	1.2642		1.90109		0.0254411	Suc
H3lac	H_contig_284	5867	6139	-	91				247.381	306.15	416.708	465.105	17.9127	37.1825	1.23756		1.88011		0.0724092	Suc
H3lac	H_contig_284	6132	6695	-	188	K01515	nudF; ADP-ribose pyrophosphatase [EC:3.6.1.13]		202.642	289.061	301.709	363.874	14.4508	36.4149	1.42646		1.79565		0.071312	Suc
H3lac	H_contig_284	6774	8147	-	458	K04042	glmU; bifunctional UDP-N-acetylglucosamine pyrophosphorylase / Glucosamine-1-phosphate N-acetyltransferase [EC:2.7.7.23 2.3.1.157]		155.018	222.288	231.689	284.757	15.4226	37.4397	1.43395		1.83692		0.099489	Suc
H3lac	H_contig_284	8442	9221	+	260	K00286	E1.5.1.2, proC; pyrroline-5-carboxylate reductase [EC:1.5.1.2]		51.0621	62.1749	7.35368	88.9648	0	40.7925	1.21763		1.74229		ZERO	Suc
H3lac	H_contig_284	9645	10928	-	428	K03545	tig; trigger factor		330.42	124.56	23.825	380.608	7.61707	41.351	0.376975		1.15189		0.0230527	Suc
H3lac	H_contig_284	11065	11253	-	63				50.3925	49.1352	30.3485	93.742	0	34.2359	0.975049		1.86024		ZERO	Suc
H3lac	H_contig_284	11246	12529	-	428	K00790	murA; UDP-N-acetylglucosamine 1-carboxyvinyltransferase [EC:2.5.1.7]		80.9192	69.1107	27.5476	128.786	3.80854	36.4865	0.854071		1.59154		0.047066	Suc
H3lac	H_contig_284	12650	13405	-	252	K01092	E3.1.3.25, IMPA, suhB; myo-inositol-1(or 4)-monophosphatase [EC:3.1.3.25]		85.8963	64.1487	17.7033	107.413	2.15616	36.7963	0.746815		1.25049		0.0251018	Suc
H3lac	H_contig_284	13386	13670	-	95				91.1405	76.0302	20.1258	150.234	0	34.9065	0.834209		1.64838		ZERO	Suc
H3lac	H_contig_284	13674	13997	-	108	K16509	spxA; regulatory protein spx		157.667	121.018	23.6044	168.605	0	34.1677	0.767553		1.06937		ZERO	Suc
H3lac	H_contig_284	15349	16776	-	476	K00796	folP; dihydropteroate synthase [EC:2.5.1.15]		73.9719	47.69	9.37233	71.3404	3.42448	35.6273	0.644705		0.964426		0.0462944	Suc
H3lac	H_contig_284	16773	17348	-	192	K01495	GCH1, folE; GTP cyclohydrolase I [EC:3.5.4.16]		66.1402	30.4536	1.65968	71.7712	2.82995	34.1798	0.46044		1.08514		0.0427872	Suc
H3lac	H_contig_284	17396	17908	-	171	K00950	folK; 2-amino-4-hydroxy-6-hydroxymethyldihydropteridine diphosphokinase [EC:2.7.6.3]		81.0138	34.1935	5.59051	80.5852	0	35.705	0.42207		0.99471		ZERO	Suc
H3lac	H_contig_284	17901	18239	-	113	K01633	folB; dihydroneopterin aldolase [EC:4.1.2.25]		76.6226	21.3064	2.81999	95.8159	0	28.8206	0.27807		1.25049		ZERO	Suc
H3lac	H_contig_284	18405	18674	-	90	K02956	RP-S15, MRPS15, rpsO; small subunit ribosomal protein S15		782.458	389.806	180.574	869.457	6.03724	35.2903	0.498181		1.11119		0.00771573	Suc
H3lac	H_contig_284	18826	20751	-	642	K08884	K08884; serine/threonine protein kinase, bacterial [EC:2.7.11.1]		325.025	249.656	109.198	353.394	14.3878	40.5363	0.768112		1.08728		0.0442667	Suc
H3lac	H_contig_284	20753	21499	-	249	K01090	E3.1.3.16; protein phosphatase [EC:3.1.3.16]		219.067	200.29	107.5	300.426	13.0928	36.1878	0.914288		1.37139		0.0597663	Suc
H3lac	H_contig_284	21630	22943	-	438	K03500	rsmB, sun; 16S rRNA (cytosine967-C5)-methyltransferase [EC:2.1.1.176]		67.2109	73.0297	36.3766	91.0132	8.6837	38.5474	1.08657		1.35414		0.129201	Suc
H3lac	H_contig_284	22936	23874	-	313	K00604	MTFMT, fmt; methionyl-tRNA formyltransferase [EC:2.1.2.9]		80.2211	64.8333	39.7051	97.4857	5.20784	38.4692	0.808182		1.21521		0.0649186	Suc
H3lac	H_contig_284	29876	31603	-	576	K08483	PTS-EI.PTSI, ptsI; phosphotransferase system, enzyme I, PtsI [EC:2.7.3.9]		1017.16	864.643	144.946	1424.32	40.5627	38.8764	0.850059		1.40029		0.0398785	Suc
H3lac	H_contig_284	31606	31875	-	90	K11189	PTS-HPR; phosphocarrier protein		1709.22	1570.69	708.132	2274.81	181.117	30.4642	0.918949		1.3309		0.105965	Suc
H3lac	H_contig_284	32179	33207	-	343	K01626	E2.5.1.54, aroF, aroG, aroH; 3-deoxy-7-phosphoheptulonate synthase [EC:2.5.1.54]		252.43	116.32	8.36132	314.227	7.92057	40.5182	0.460801		1.24481		0.0313773	Suc
H3lac	H_contig_284	33335	34360	-	342	K01626	E2.5.1.54, aroF, aroG, aroH; 3-deoxy-7-phosphoheptulonate synthase [EC:2.5.1.54]		214.349	98.5577	10.2493	253.268	9.53248	40.6842	0.4598		1.18157		0.0444718	Suc
H3lac	H_contig_284	34490	37081	-	864	K03070	secA; preprotein translocase subunit SecA		217.795	136.543	25.0797	275.123	4.40215	39.588	0.626936		1.26322		0.0202124	Suc
H3lac	H_contig_284	37202	38419	-	406	K11275	H1_5; histone H1/5		504.715	410.872	178.952	637.607	32.1193	39.7167	0.814067		1.2633		0.0636385	Suc
H3lac	H_contig_284	38487	38969	-	161	K03571	mreD; rod shape-determining protein MreD		50.1933	57.6804	15.834	94.7609	0	39.7096	1.14916		1.88792		ZERO	Suc
H3lac	H_contig_284	39964	40842	-	293	K03570	mreC; rod shape-determining protein MreC		70.9216	59.8678	42.4154	95.7416	9.27221	40.038	0.84414		1.34996		0.130739	Suc
H3lac	H_contig_284	42346	43023	-	226	K01807	rpiA; ribose 5-phosphate isomerase A [EC:5.3.1.6]		104.718	124.795	105.75	206.875	4.80842	37.1129	1.19173		1.97556		0.045918	Suc
H3lac	H_contig_296	2013	2345	+	111				96.2039	40.282	5.74161	93.1086	0	41.3185	0.418715		0.967826		ZERO	Suc
H3lac	H_contig_296	2342	3781	+	480	K00483	hpaB; 4-hydroxyphenylacetate 3-monooxygenase [EC:1.14.14.9]		57.7223	22.2132	1.99162	50.2399	0	42.9241	0.384828		0.870371		ZERO	Suc
H3lac	H_contig_296	6323	6871	+	183	K00760	hprT, hpt, HPRT1; hypoxanthine phosphoribosyltransferase [EC:2.4.2.8]		94.6268	48.8667	1.74131	145.223	5.93827	42.8703	0.516415		1.5347		0.0627546	Suc
H3lac	H_contig_296	6982	9060	+	693	K03798	ftsH, hflB; cell division protease FtsH [EC:3.4.24.-]		189.076	105.219	11.0358	237.906	2.35217	42.7324	0.556489		1.25825		0.0124403	Suc
H3lac	H_contig_296	9140	9853	+	238	K00889	E2.7.1.68, PIP5K; 1-phosphatidylinositol-4-phosphate 5-kinase [EC:2.7.1.68]		56.9947	63.5867	20.0836	66.1708	2.28299	40.0091	1.11566		1.161		0.0400561	Suc
H3lac	H_contig_313	2375	3634	+	420	K03588	ftsW, spoVE; cell division protein FtsW		135.373	91.719	2.27614	185.14	1.29369	36.0371	0.67753		1.36764		0.00955654	Suc
H3lac	H_contig_313	3753	7166	+	1138	K01958	PC, pyc; pyruvate carboxylase [EC:6.4.1.1]		299.771	219.424	17.361	396.571	7.16192	37.2915	0.731974		1.32291		0.0238913	Suc
H3lac	H_contig_313	7376	8257	+	294	K01624	FBA, fbaA; fructose-bisphosphate aldolase, class II [EC:4.1.2.13]		1844.56	1346.54	108.388	2515.97	40.6589	36.1964	0.730004		1.36399		0.0220426	Suc
H3lac	H_contig_313	11735	12457	-	241	K07668	vicR; two-component system, OmpR family, response regulator VicR		95.8047	137.008	140.157	189.915	15.782	36.6652	1.43007		1.98231		0.164731	Suc
H3lac	H_contig_313	12681	13421	+	247	K02028	ABC.PA.A; polar amino acid transport system ATP-binding protein [EC:3.6.3.21]		212.661	137.857	3.87036	314.814	2.1998	36.651	0.648247		1.48035		0.0103442	Suc
H3lac	H_contig_313	13502	14308	+	269	K10039	ABC.GLN1.S; putative glutamine transport system substrate-binding protein		216.727	149.597	8.29225	272.601	2.01989	36.655	0.690258		1.25781		0.00931999	Suc
H3lac	H_contig_313	14391	15074	+	228	K10040	ABC.GLN1.P; putative glutamine transport system permease protein		196.205	150.854	5.59051	261.182	0	35.4159	0.768856		1.33117		ZERO	Suc
H3lac	H_contig_313	15093	15761	+	223	K10040	ABC.GLN1.P; putative glutamine transport system permease protein		205.781	131.101	7.14483	198.624	0	37.4435	0.637087		0.965217		ZERO	Suc
H3lac	H_contig_313	16539	17186	+	216	K00943	E2.7.4.9, tmk; dTMP kinase [EC:2.7.4.9]		98.8762	101.91	53.1099	161.77	0	34.5784	1.03068		1.63609		ZERO	Suc
H3lac	H_contig_313	17173	18036	+	288	K02341	DPO3D2, holB; DNA polymerase III subunit delta' [EC:2.7.7.7]		117.248	77.6267	44.2582	133.289	1.88664	35.2768	0.66207		1.13681		0.0160909	Suc
H3lac	H_contig_313	18107	18877	+	257				67.3802	42.826	18.5988	78.5135	0	36.4707	0.635588		1.16523		ZERO	Suc
H3lac	H_contig_313	18877	19215	+	113				86.8389	76.0943	36.6599	108.882	4.80842	35.3555	0.87627		1.25384		0.0553717	Suc
H3lac	H_contig_313	19212	20075	+	288	K07056	rsmI; 16S rRNA (cytidine1402-2'-O)-methyltransferase [EC:2.1.1.198]		80.1699	46.576	39.8324	90.5684	0	35.5551	0.580967		1.12971		ZERO	Suc
H3lac	H_contig_313	20197	21033	+	279	K02030	ABC.PA.S; polar amino acid transport system substrate-binding protein		63.1015	76.4325	5.71074	104.074	1.9475	39.6639	1.21126		1.64931		0.0308629	Suc
H3lac	H_contig_313	24314	24925	+	204	K04564	SOD2; superoxide dismutase, Fe-Mn family [EC:1.15.1.1]		169.772	424.875	374.893	337.747	31.9618	32.6469	2.50263		1.98942		0.188264	Suc
H3lac	H_contig_3134	364	1974	-	537	K01937	E6.3.4.2, pyrG; CTP synthase [EC:6.3.4.2]		111.253	33.3058	2.96703	121.891	5.05914	33.5142	0.299371		1.09562		0.0454744	Suc
H3lac	H_contig_325	3	146	+	48				426.905	465.76	351.853	727.965	45.2793	20.1695	1.09102		1.70522		0.106064	Suc
H3lac	H_contig_325	251	1489	+	413	K07284	srtA; sortase A [EC:3.4.22.70]		101.329	82.4472	19.2893	94.1392	2.63124	31.7203	0.813662		0.929049		0.0259674	Suc
H3lac	H_contig_325	1492	2682	+	397	K07284	srtA; sortase A [EC:3.4.22.70]		85.7838	76.24	20.0667	97.9332	0	32.7654	0.888745		1.14163		ZERO	Suc
H3lac	H_contig_325	3247	4134	+	296	K06180	rluD; 23S rRNA pseudouridine1911/1915/1917 synthase [EC:5.4.99.23]		57.5273	19.7537	5.38276	81.47	0	29.045	0.343379		1.4162		ZERO	Suc
H3lac	H_contig_325	4246	5784	+	513	K01951	guaA, GMPS; GMP synthase (glutamine-hydrolysing) [EC:6.3.5.2]		272.859	150.854	36.0278	317.544	8.47331	29.0907	0.552863		1.16377		0.0310538	Suc
H3lac	H_contig_325	11923	13935	+	671	K04041	fbp3; fructose-1,6-bisphosphatase III [EC:3.1.3.11]		50.7544	40.4944	27.0694	60.143	8.09764	29.8283	0.797851		1.18498		0.159546	Suc
H3lac	H_contig_325	25852	27396	+	515	K00602	purH; phosphoribosylaminoimidazolecarboxamide formyltransferase / IMP cyclohydrolase [EC:2.1.2.3 3.5.4.10]		172.607	158.95	6.80631	257.062	1.05505	28.4877	0.92088		1.4893		0.00611246	Suc
H3lac	H_contig_325	32264	33709	+	482	K00690	E2.4.1.7; sucrose phosphorylase [EC:2.4.1.7]		131.731	219.783	21.8169	199.105	4.50914	31.671	1.66842		1.51144		0.0342298	Suc
H3lac	H_contig_325	33795	34784	+	330	K01784	galE, GALE; UDP-glucose 4-epimerase [EC:5.1.3.2]		188.909	230.34	59.8693	263.969	6.58608	29.0209	1.21931		1.39733		0.0348637	Suc
H3lac	H_contig_325	37380	38621	-	414	K03740	dltD; D-alanine transfer protein		81.5642	48.1857	10.0062	83.213	3.93733	32.094	0.59077		1.02022		0.0482728	Suc
H3lac	H_contig_325	44957	45892	-	312	K00963	UGP2, galU, galF; UTP--glucose-1-phosphate uridylyltransferase [EC:2.7.7.9]		186.858	144.413	24.5123	228.721	3.48302	29.7591	0.772852		1.22404		0.01864	Suc
H3lac	H_contig_325	45894	46931	-	346	K00057	gpsA; glycerol-3-phosphate dehydrogenase (NAD(P)+) [EC:1.1.1.94]		129.291	136.187	14.7357	201.979	1.57038	29.3188	1.05333		1.5622		0.0121461	Suc
H3lac	H_contig_325	47650	48798	+	383	K10352	MYH; myosin heavy chain		110.773	182.3	183.874	182.466	9.9307	30.977	1.64572		1.64722		0.0896494	Suc
H3lac	H_contig_333	4835	6148	-	438	K01939	E6.3.4.4, purA; adenylosuccinate synthase [EC:6.3.4.4]		197.02	76.1707	11.6405	214.611	1.24053	38.9393	0.386614		1.08929		0.00629645	Suc
H3lac	H_contig_333	8099	8383	-	95	K04078	groES, HSPE1; chaperonin GroES		100.255	61.5483	30.1888	170.956	0	38.2121	0.61392		1.70522		ZERO	Suc
H3lac	H_contig_333	9045	9668	-	208	K06878	K06878; tRNA-binding protein		92.9663	47.954	16.8522	115.938	2.61227	36.5765	0.515822		1.2471		0.0280991	Suc
H3lac	H_contig_333	9698	10015	-	106	K06878	K06878; tRNA-binding protein		81.6825	61.6507	51.1057	111.429	10.2519	38.5518	0.75476		1.36417		0.125509	Suc
H3lac	H_contig_333	10012	10326	-	105				52.225	39.3081	6.0697	46.871	0	40.5183	0.752669		0.897483		ZERO	Suc
H3lac	H_contig_352	6574	7392	-	273	K07024	K07024		162.807	409.46	271.969	886.944	13.9321	37.7805	2.51501		5.44784	OC	0.0855745	Suc
H3lac	H_contig_352	7452	10274	-	941	K01212	sacC; levanase [EC:3.2.1.65]		247.82	467.855	190.654	1031.36	4.04193	40.7538	1.88788		4.16174		0.01631	Suc
H3lac	H_contig_352	10416	11240	-	275	K02796	PTS-Man-EIID, manZ; PTS system, mannose-specific IID component		523.699	824.22	272.309	2165.44	11.8549	40.4755	1.57384		4.1349		0.0226369	Suc
H3lac	H_contig_352	11252	12043	-	264	K02795	PTS-Man-EIIC, manY; PTS system, mannose-specific IIC component		536.774	936.732	148.466	2184.83	10.2907	39.2419	1.74511		4.07029		0.0191715	Suc
H3lac	H_contig_352	12106	12597	-	164	K02794	PTS-Man-EIIB, manX; PTS system, mannose-specific IIB component [EC:2.7.1.69]		527.948	805.337	139.899	1857.55	9.93935	38.1459	1.52541		3.51843		0.0188264	Suc
H3lac	H_contig_352	12594	13037	-	148	K02793	PTS-Man-EIIA, manX; PTS system, mannose-specific IIA component [EC:2.7.1.69]		469.969	680.921	58.1338	1596.15	11.0139	39.4452	1.44886		3.39628		0.0234353	Suc
H3lac	H_contig_352	17628	18758	-	377	K05823	E3.5.1.47; N-acetyldiaminopimelate deacetylase [EC:3.5.1.47]		173.014	93.9694	45.6435	187.981	12.9713	37.9184	0.543132		1.08651		0.0749723	Suc
H3lac	H_contig_352	19048	19731	-	228	K00674	dapD; 2,3,4,5-tetrahydropyridine-2-carboxylate N-succinyltransferase [EC:2.3.1.117]		177.218	101.072	25.1573	168.366	2.38312	34.3714	0.570326		0.950049		0.0134474	Suc
H3lac	H_contig_352	19797	20597	-	267	K16785	ecfT; energy-coupling factor transport system permease protein		110.256	64.4094	8.35436	147.459	2.03502	39.6305	0.58418		1.33743		0.0184572	Suc
H3lac	H_contig_352	20590	21444	-	285	K16787	ecfA2; energy-coupling factor transport system ATP-binding protein [EC:3.6.3.-]		126.584	68.7892	1.1181	153.688	0	40.4802	0.543427		1.21411		ZERO	Suc
H3lac	H_contig_352	21420	22256	-	279	K16786	ecfA1; energy-coupling factor transport system ATP-binding protein [EC:3.6.3.-]		93.1005	65.3375	2.2843	132.297	0	39.3489	0.701795		1.42101		ZERO	Suc
H3lac	H_contig_352	22373	24619	-	749	K00527	nrdD; ribonucleoside-triphosphate reductase [EC:1.17.4.2]		177.251	143.732	68.4969	190.55	14.5087	41.5704	0.810892		1.07503		0.0818538	Suc
H3lac	H_contig_352	31096	33690	-	865	K03695	clpB; ATP-dependent Clp protease ATP-binding subunit ClpB		202.195	268.397	312.028	706.072	1065.97	41.6585	1.32742		3.49204		5.27201	AcPro
H3lac	H_contig_352	39924	40397	+	158	K07173	luxS; S-ribosylhomocysteine lyase [EC:4.4.1.21]		67.5863	39.1837	0	102.79	3.43893	37.1651	0.579759		1.52087		0.0508821	Suc
H3lac	H_contig_352	40402	40950	+	183	K16788	niaX; niacin transporter		72.5472	65.7821	0	112.951	0	40.2294	0.906749		1.55694		ZERO	Suc
H3lac	H_contig_352	41212	42408	-	399	K00927	PGK, pgk; phosphoglycerate kinase [EC:2.7.2.3]		1028.59	799.093	170.91	1325.96	46.3006	41.7878	0.776885		1.28911		0.0450139	Suc
H3lac	H_contig_352	43288	43464	-	59	K02970	RP-S21, MRPS21, rpsU; small subunit ribosomal protein S21		792.459	273.991	16.203	675.657	18.4187	38.277	0.345748		0.852609		0.0232424	Suc
H3lac	H_contig_352	43630	44346	-	239	K00975	glgC; glucose-1-phosphate adenylyltransferase [EC:2.7.7.27]		143.702	89.2245	11.9997	224.451	2.27344	42.9206	0.6209		1.56192		0.0158205	Suc
H3lac	H_contig_352	45598	46230	-	211				58.8166	26.0812	12.0819	90.9653	0	40.8993	0.443433		1.54659		ZERO	Suc
H3lac	H_contig_352	46344	47096	-	251	K00599	E2.1.1.-		88.5382	47.9606	13.9651	80.3903	2.16475	40.0555	0.541694		0.907973		0.0244498	Suc
H3lac	H_contig_352	47144	47500	-	119	K09710	ybeB; ribosome-associated protein		84.8858	49.1352	18.7447	119.935	4.56598	32.4772	0.578839		1.41289		0.0537897	Suc
H3lac	H_contig_352	47507	48472	-	322				77.9789	63.0212	12.8651	76.4201	0	39.8236	0.808182		0.98001		ZERO	Suc
H3lac	H_contig_352	48453	49052	-	200	K00969	nadD; nicotinate-nucleotide adenylyltransferase [EC:2.7.7.18]		83.6974	49.8722	19.1196	83.6647	5.43351	38.6456	0.595863		0.99961		0.0649186	Suc
H3lac	H_contig_352	49042	49716	-	225	K00969	nadD; nicotinate-nucleotide adenylyltransferase [EC:2.7.7.18]		105.183	79.4898	15.5789	96.2418	2.41489	37.757	0.755729		0.914995		0.022959	Suc
H3lac	H_contig_352	49731	50039	-	103	K07574	yhbY; RNA-binding protein		70.0514	23.375	12.3751	76.4498	5.27526	39.432	0.333683		1.09134		0.0753055	Suc
H3lac	H_contig_352	51045	52181	-	379	K06948	K06948		72.3433	37.2079	6.72632	89.5991	1.43364	39.8478	0.514324		1.23853		0.0198172	Suc
H3lac	H_contig_352	58715	59407	-	231	K00655	plsC; 1-acyl-sn-glycerol-3-phosphate acyltransferase [EC:2.3.1.51]		61.2207	35.7347	6.89739	61.7845	0	37.8283	0.583703		1.00921		ZERO	Suc
H3lac	H_contig_352	59854	60513	-	220	K04767	acuB; acetoin utilization protein AcuB		380.443	281.411	139.051	514.516	12.3489	39.5243	0.739692		1.35241		0.0324593	Suc
H3lac	H_contig_352	60946	61656	-	237	K01996	livF; branched-chain amino acid transport system ATP-binding protein		628.37	282.994	29.5802	805.707	9.17049	39.2431	0.450362		1.28222		0.0145941	Suc
H3lac	H_contig_352	61656	62420	-	255	K01995	livG; branched-chain amino acid transport system ATP-binding protein		576.092	299.436	24.9929	627.244	4.26158	43.5659	0.519771		1.08879		0.0073974	Suc
H3lac	H_contig_352	62420	63379	-	320	K01998	livM; branched-chain amino acid transport system permease protein		588.948	285.905	15.933	682.852	1.69797	38.599	0.485451		1.15944		0.00288306	Suc
H3lac	H_contig_352	63384	64265	-	294	K01997	livH; branched-chain amino acid transport system permease protein		408.376	198.88	5.41938	589.235	1.84813	38.851	0.487004		1.44288		0.00452557	Suc
H3lac	H_contig_352	66323	67504	-	394	K01999	livK; branched-chain amino acid transport system substrate-binding protein		297.402	247.921	4.85268	530.868	4.13719	41.4591	0.833622		1.78502		0.0139111	Suc
H3lac	H_contig_352	67705	68889	-	395	K01999	livK; branched-chain amino acid transport system substrate-binding protein		176.09	119.293	3.22693	199.35	1.37557	40.6241	0.677455		1.13209		0.00781178	Suc
H3lac	H_contig_352	68945	70129	-	395	K01999	livK; branched-chain amino acid transport system substrate-binding protein		700.705	480.654	34.6895	903.305	17.8824	41.8434	0.685957		1.28914		0.0255206	Suc
H3lac	H_contig_352	71075	73294	-	740	K00951	relA; GTP pyrophosphokinase [EC:2.7.6.5]		93.2138	74.8315	2.58372	101.754	1.46852	40.7097	0.802795		1.09162		0.0157543	Suc
H3lac	H_contig_352	81258	82004	-	249	K09761	rsmE; 16S rRNA (uracil1498-N3)-methyltransferase [EC:2.1.1.193]		53.3178	40.058	10.238	61.2711	0	39.9747	0.751306		1.14917		ZERO	Suc
H3lac	H_contig_352	83546	83974	-	143				62.5662	43.2939	8.91355	79.1563	0	40.2778	0.69197		1.26516		ZERO	Suc
H3lac	H_contig_352	85267	85788	-	174				145.965	205.577	122.702	271.529	6.24542	45.2472	1.4084		1.86024		0.0427872	Suc
H3lac	H_contig_352	91426	91674	-	83	K02078	acpP; acyl carrier protein		118.226	87.0225	19.1963	278.685	6.5464	35.67	0.736066		2.35721		0.0553717	Suc
H3lac	H_contig_352	91675	92694	-	340	K03621	plsX; glycerol-3-phosphate acyltransferase PlsX [EC:2.3.1.15]		201.179	123.416	25.3053	293.84	6.39237	40.2213	0.613463		1.46059		0.0317745	Suc
H3lac	H_contig_352	94748	96370	-	541	K01552	E3.6.3.-		126.434	68.0263	8.83528	155.558	0	43.1921	0.538037		1.23035		ZERO	Suc
H3lac	H_contig_352	96900	97922	+	341	K01867	WARS, trpS; tryptophanyl-tRNA synthetase [EC:6.1.1.2]		65.1704	33.2851	4.67242	90.9242	1.59341	38.0618	0.51074		1.39518		0.0244498	Suc
H3lac	H_contig_352	102732	103907	-	392	K00841	patA; aminotransferase [EC:2.6.1.-]		231.184	182.502	39.8324	302.569	9.7027	40.8534	0.789424		1.30878		0.0419696	Suc
H3lac	H_contig_417	12543	12767	-	75				50.026	64.2033	16.9952	85.3052	0	37.7909	1.2834		1.70522		ZERO	Suc
H3lac	H_contig_417	12831	14162	-	444	K03429	ugtP; 1,2-diacylglycerol 3-glucosyltransferase [EC:2.4.1.157]		75.403	52.6764	9.33011	95.3255	0	41.3818	0.698598		1.26421		ZERO	Suc
H3lac	H_contig_417	14258	15256	-	333	K13677	dgs; 1,2-diacylglycerol-3-glucose alpha-1,2-glucosyltransferase [EC:2.4.1.208]		76.2697	34.0848	11.4832	91.6307	1.63169	39.0182	0.446897		1.2014		0.0213936	Suc
H3lac	H_contig_417	15924	17180	-	419	K01362	E3.4.21.-		61.3041	71.416	17.492	108.061	2.59356	41.2795	1.16495		1.7627		0.0423065	Suc
H3lac	H_contig_417	19581	21062	+	494	K00088	guaB; IMP dehydrogenase [EC:1.1.1.205]		247.715	145.516	5.16047	286.919	7.69931	37.7017	0.587431		1.15826		0.0310813	Suc
H3lac	H_contig_417	30648	32237	+	530	K01992	ABC-2.P; ABC-2 type transport system permease protein		52.2768	49.3206	35.4734	67.7861	4.10076	36.8967	0.94345		1.29668		0.0784433	Suc
H3lac	H_contig_417	32277	33233	+	319	K07088	K07088		64.2365	46.3627	55.9402	81.7671	1.7033	40.2808	0.72175		1.27291		0.026516	Suc
H3lac	H_contig_417	33292	34596	-	435	K07258	dacC, dacA, dacD; D-alanyl-D-alanine carboxypeptidase (penicillin-binding protein 5/6) [EC:3.4.16.4]		73.6457	40.3247	5.8604	75.8017	2.49817	37.1195	0.54755		1.02928		0.0339214	Suc
H3lac	H_contig_417	44050	44463	+	138	K02950	RP-S12, MRPS12, rpsL; small subunit ribosomal protein S12		759.174	366.377	18.473	1134.07	0	39.7462	0.4826		1.49383		ZERO	Suc
H3lac	H_contig_417	44484	44951	+	156	K02992	RP-S7, MRPS7, rpsG; small subunit ribosomal protein S7		834.384	282.212	18.3842	1063.16	10.4491	37.2018	0.338228		1.27419		0.0125231	Suc
H3lac	H_contig_417	45235	47310	+	692	K02355	fusA, GFM, EFG; elongation factor G		673.149	285.296	23.485	856.276	10.2075	38.6422	0.423823		1.27205		0.0151638	Suc
H3lac	H_contig_417	47525	48343	+	273	K09685	K09685, purR; purine operon repressor		77.1745	74.3327	52.5263	95.5447	5.97089	37.4829	0.963176		1.23803		0.0773687	Suc
H3lac	H_contig_435	2677	4350	+	558	K06158	ABCF3; ATP-binding cassette, subfamily F, member 3		80.6871	59.1735	52.5388	107.602	6.81624	31.935	0.73337		1.33357		0.0844774	Suc
H3lac	H_contig_435	10556	10807	+	84				65.2812	49.1352	11.3807	29.2944	0	22.8685	0.752669		0.448741		ZERO	Suc
H3lac	H_contig_435	10919	11479	+	187	K03100	lepB; signal peptidase I [EC:3.4.21.89]		78.7123	40.4643	5.11218	105.272	2.90562	33.7842	0.514078		1.33743		0.0369145	Suc
H3lac	H_contig_435	11692	12981	+	430	K00756	E2.4.2.2, pdp; pyrimidine-nucleoside phosphorylase [EC:2.4.2.2]		53.6952	41.5935	7.41068	54.9372	1.26361	31.4315	0.774622		1.02313		0.023533	Suc
H3lac	H_contig_435	12978	13643	+	222	K01619	deoC, DERA; deoxyribose-phosphate aldolase [EC:4.1.2.4]		63.7026	35.6341	7.17701	88.6749	0	30.3114	0.559382		1.39201		ZERO	Suc
H3lac	H_contig_435	13627	14034	+	136	K01489	cdd, CDA; cytidine deaminase [EC:3.5.4.5]		63.6643	53.1093	11.7154	97.7054	0	30.319	0.834209		1.5347		ZERO	Suc
H3lac	H_contig_435	14170	15222	+	351	K07335	bmpA, bmpB, tmpC; basic membrane protein A and related proteins		547.622	479.173	118.022	780.983	20.1241	32.9254	0.875007		1.42613		0.0367482	Suc
H3lac	H_contig_435	15346	16563	+	406	K01839	deoB; phosphopentomutase [EC:5.4.2.7]		164.21	144.864	43.1681	227.89	9.36813	31.5501	0.882187		1.3878		0.0570496	Suc
H3lac	H_contig_435	16566	17375	+	270	K03783	punA; purine-nucleoside phosphorylase [EC:2.4.2.1]		171.029	145.222	54.2901	262.478	18.1117	30.0728	0.849105		1.5347		0.105898	Suc
H3lac	H_contig_435	17375	18079	+	235	K03784	deoD; purine-nucleoside phosphorylase [EC:2.4.2.1]		125.27	89.2797	43.3919	152.879	2.31213	31.8009	0.712699		1.2204		0.0184572	Suc
H3lac	H_contig_435	18213	19727	+	505	K02056	ABC.SS.A; simple sugar transport system ATP-binding protein [EC:3.6.3.17]		135.447	105.568	17.6682	141.309	6.45566	30.837	0.779399		1.04328		0.0476617	Suc
H3lac	H_contig_435	19730	20806	+	359	K02057	ABC.SS.P; simple sugar transport system permease protein		141.492	104.429	24.8536	153.538	1.51351	30.27	0.738058		1.08514		0.0106968	Suc
[truncated: 1,771 more rows]

## Sheet: D2. SPM change
Supplementary Data 2. List of CDSs that showed a significant response (5-times change and mRNA-RPKM after/before stimulus over 50) to the given stimulus in SP-M community.
Bin-genom ID	Contig ID	ORF begin	ORF end	Strand	Length	KO	KO description blue letters: key marker genes described in Fig.5	CytC Family ID (No. CXXCH domain)	Gene expression level (mRNARPKM)					Ave DNARPKM	Gene expression dynamics *CDSs counted for Fig. 4 are colored and labeled
									Con1 SP	Con2 SP+	Con3 OCshort	Con4 OClong	Con5 AcPro		SP+/SP	SP+ or SP	OClong/SP	EET or OC	AcPro/SP	Suc or AcPro
M1geoA	M_contig_102	3	362	+	120	K01809	E5.3.1.8, manA; mannose-6-phosphate isomerase [EC:5.3.1.8]		69.3614	72.2797	27.5215	9.12682	140.375	135.902	1.04207		0.131584	EET	2.02382
M1geoA	M_contig_102	908	1981	+	358	K00971	manC, cpsB; mannose-1-phosphate guanylyltransferase [EC:2.7.7.13]		72.8488	63.4539	51.3969	10.7074	76.4613	129.591	0.871035		0.146982	EET	1.04959
M1geoA	M_contig_103	6517	6804	+	96				57.8012	86.0473	34.4019	5.70426	131.602	126.951	1.48868		0.0986877	EET	2.2768
M1geoA	M_contig_103	6848	7108	+	87				57.4025	75.959	27.1148	0	24.2026	121.716	1.32327		ZERO	EET	0.421629
M1geoA	M_contig_103	14093	14947	-	285	K01963	accD; acetyl-CoA carboxylase carboxyl transferase subunit beta [EC:6.4.1.2]		85.6674	101.445	43.0411	15.3715	125.599	129.162	1.18418		0.179432	EET	1.46612
M1geoA	M_contig_103	18237	18884	-	216				77.0682	80.3108	15.2897	0	155.972	146.813	1.04207		ZERO	EET	2.02382
M1geoA	M_contig_1032	2755	3072	-	106				52.3482	23.3789	26.7055	0	39.7288	123.032	0.446603		ZERO	EET	0.758933
M1geoA	M_contig_1032	6407	6964	-	186				104.415	64.3967	48.1943	17.6648	79.244	162.412	0.616738		0.169179	EET	0.758933
M1geoA	M_contig_1045	1775	2095	-	107				67.4167	65.6211	44.0932	10.2357	98.3937	144.489	0.973366		0.151827	EET	1.45949
M1geoA	M_contig_1045	4522	4788	+	89	K02959	RP-S16, MRPS16, rpsP; small subunit ribosomal protein S16		342.91	310.931	121.925	36.9175	733.42	134.741	0.90674		0.107659	EET	2.13881
M1geoA	M_contig_1045	6937	7293	+	119	K02884	RP-L19, MRPL19, rplS; large subunit ribosomal protein L19		331.069	246.428	241.845	41.4158	548.524	128.582	0.744339		0.125097	EET	1.65683
M1geoA	M_contig_1045	10327	11214	+	296	K03426	E3.6.1.22, NUDT12, nudC; NAD+ diphosphatase [EC:3.6.1.22]		50.6151	93.4892	28.6904	0	92.4768	137.167	1.84706		ZERO	EET	1.82706
M1geoA	M_contig_1075	2082	3107	-	342	K10255	FAD6, desA; omega-6 fatty acid desaturase (delta-12 desaturase) [EC:1.14.19.-]		12.9799	18.1152	12.4157	4.80359	80.0384	80.1591	1.39564		0.370079		6.16633	AcPro
M1geoA	M_contig_1075	3340	4344	-	335	K06873	K06873		76.194	62.8788	39.4338	1.63465	69.1399	128.666	0.825245		0.0214538	EET	0.90742
M1geoA	M_contig_1085	160	948	-	263				50.6364	80.0927	23.3208	4.16433	24.0185	141.99	1.58172		0.0822397	EET	0.474333
M1geoA	M_contig_1085	960	2651	-	564	K01887	RARS, argS; arginyl-tRNA synthetase [EC:6.1.1.19]		60.0148	85.6812	30.1147	3.88375	52.2673	145.008	1.42767		0.0647132	EET	0.870907
M1geoA	M_contig_1105	1198	2823	+	542	K00058	serA, PHGDH; D-3-phosphoglycerate dehydrogenase [EC:1.1.1.95]		174.043	188.225	140.146	16.1656	310.793	129.98	1.08148		0.0928825	EET	1.78572
M1geoA	M_contig_1105	5768	6325	-	186	K00567	E2.1.1.63, MGMT, ogt; methylated-DNA-[protein]-cysteine S-methyltransferase [EC:2.1.1.63]		14.9164	17.7646	10.1462	2.94414	90.5645	143.663	1.19094		0.197375		6.07146	AcPro
M1geoA	M_contig_112	350	502	+	51				10.8802	72.8871	18.5018	32.2123	82.5735	69.0509	6.69905	SP+	2.96063		7.58933	AcPro
M1geoA	M_contig_112	499	1344	+	282	K07147	yedY; sulfoxide reductase catalytic subunit YedY [EC:1.8.-.-]		21.6447	33.6866	20.0765	27.1863	156.802	86.3007	1.55635		1.25602		7.24436	AcPro
M1geoA	M_contig_112	1337	2113	+	259	K07147	yedY; sulfoxide reductase catalytic subunit YedY [EC:1.8.-.-]		14.9971	12.7576	14.5729	4.22864	97.5579	97.1968	0.850673		0.281965		6.50514	AcPro
M1geoA	M_contig_112	3978	4853	+	292	K00765	hisG; ATP phosphoribosyltransferase [EC:2.4.2.17]		96.9159	87.6975	46.8565	16.8784	165.854	122.83	0.904883		0.174155	EET	1.71132
M1geoA	M_contig_112	12181	12576	-	132				12.6112	18.774	25.0195	16.5942	63.8068	140.929	1.48868		1.31584		5.05955	AcPro
M1geoA	M_contig_112	17028	17513	-	162				6.85051	25.4955	0	6.76061	77.9861	141.085	3.7217		0.986877		11.384	AcPro
M1geoA	M_contig_1128	810	1232	-	141	K08906	petJ; cytochrome c6		35.4186	29.2927	33.4608	46.605	194.136	116.476	0.827043		1.31584		5.48118	AcPro
M1geoA	M_contig_1128	1236	2996	-	587			1819 (9)	13.2342	21.1087	16.8786	13.0605	168.594	149.626	1.59501		0.986877		12.7392	AcPro
M1geoA	M_contig_114	2867	3772	+	302	K05555	actIV; cyclase [EC:4.-.-.-]		34.9104	51.9703	67.1764	18.1328	202.196	109.619	1.48868		0.519409		5.79186	AcPro
M1geoA	M_contig_1211	3203	3286	-	28				59.4526	29.5019	67.3996	58.6724	0	88.8622	0.496226		0.986877		ZERO	SUC
M1geoA	M_contig_1227	858	2243	+	462	K03287	TC.OMF; outer membrane factor, OMF family		13.2117	24.1379	22.4665	23.706	100.268	143.563	1.82701		1.79432		7.58933	AcPro
M1geoA	M_contig_1227	2266	3594	+	443				1.25258	6.52639	2.13001	9.8891	66.5435	96.2057	5.21037		7.89501		53.1253	AcPro
M1geoA	M_contig_1227	3870	4229	+	120				50.865	48.1865	62.9063	27.3805	614.141	113.083	0.947341		0.538296		12.0739	AcPro
M1geoA	M_contig_1228	100	1758	-	553	K01178	E3.2.1.3; glucoamylase [EC:3.2.1.3]		10.0342	13.4439	5.97211	2.97075	98.9987	93.2113	1.33981		0.296063		9.86613	AcPro
M1geoA	M_contig_1228	1751	1996	+	82				20.3009	5.03692	34.5217	33.3908	179.749	85.7812	0.248113		1.64479		8.85422	AcPro
M1geoA	M_contig_126	2704	3180	-	159	K01802	E5.2.1.8; peptidylprolyl isomerase [EC:5.2.1.8]		226.842	233.789	127.593	30.9967	370.802	145.715	1.03062		0.136644	EET	1.63462
M1geoA	M_contig_126	5917	6900	+	328	K00648	fabH; 3-oxoacyl-[acyl-carrier-protein] synthase III [EC:2.3.1.180]		133.648	157.404	84.8659	21.704	410.854	156.503	1.17775		0.162397	EET	3.07416
M1geoA	M_contig_126	10171	11436	+	422	K03885	ndh; NADH dehydrogenase [EC:1.6.99.3]		21.0385	30.3409	26.8321	10.3812	119.751	135.408	1.44216		0.493438		5.692	AcPro
M1geoA	M_contig_126	11502	11834	-	111				19.9961	33.4887	38.2538	9.86683	208.666	74.7312	1.67476		0.493438		10.4353	AcPro
M1geoA	M_contig_126	11858	12007	+	50				11.0978	8.26054	28.3078	10.9522	252.675	79.5365	0.744339		0.986877		22.768	AcPro
M1geoA	M_contig_126	13381	14976	-	532	K05601	hcp; hydroxylamine reductase [EC:1.7.99.1]		16.6885	33.3838	39.0208	17.4988	102.907	137.281	2.00041		1.04856		6.16633	AcPro
M1geoA	M_contig_1302	1	720	+	240	K00963	UGP2, galU, galF; UTP--glucose-1-phosphate uridylyltransferase [EC:2.7.7.9]		67.0493	84.3264	60.9404	11.4085	61.4141	156.171	1.25768		0.170151	EET	0.915953
M1geoA	M_contig_1302	3753	5030	-	426	K00925	ackA; acetate kinase [EC:2.7.2.1]		39.0768	50.4165	21.0426	34.7076	321.281	149.624	1.29019		0.888189		8.22177	AcPro
M1geoA	M_contig_132	5982	6713	-	244	K02411	fliH; flagellar assembly protein FliH		202.399	143.882	83.1445	35.9088	94.9257	149.731	0.710886		0.177416	EET	0.469003
M1geoA	M_contig_132	6700	7692	-	331	K02410	fliG; flagellar motor switch protein FliG		209.551	102.321	54.164	11.5809	44.5298	162.924	0.488286		0.0552651	EET	0.212501
M1geoA	M_contig_132	7732	9315	-	528	K02409	fliF; flagellar M-ring protein FliF		265.885	198.691	110.801	52.8941	43.8672	145.133	0.747281		0.198936	EET	0.164985	SUC
M1geoA	M_contig_132	10245	10667	-	141	K02387	flgB; flagellar basal-body rod protein FlgB		393.54	336.866	140.535	155.35	59.7341	144.312	0.85599		0.394751		0.151787	SUC
M1geoA	M_contig_132	15310	16719	-	470	K01835	pgm; phosphoglucomutase [EC:5.4.2.2]		59.031	36.03	30.1147	9.32101	62.7208	118.454	0.610358		0.1579	EET	1.06251
M1geoA	M_contig_1321	3	338	+	112				0	7.37548	12.6374	19.5575	56.4007	103.99	∞		∞		∞	AcPro
M1geoA	M_contig_1324	43	1554	-	504	K13529	ada-alkA; AraC family transcriptional regulator, regulatory protein of adaptative response / DNA-3-methyladenine glycosylase II [EC:3.2.2.21]		24.2214	59.0039	85.1856	42.3745	142.046	56.113	2.43602		1.74946		5.86448	AcPro
M1geoA	M_contig_1324	1848	2423	-	192				86.7017	262.444	90.9192	17.1128	252.236	141.51	3.02698		0.197375	EET	2.90924
M1geoA	M_contig_1329	524	2257	-	578	K11896	impG, vasA; type VI secretion system protein ImpG		9.60019	38.5873	10.6113	0.947421	54.6443	137.6	4.01943		0.0986877		5.692	AcPro
M1geoA	M_contig_1329	2772	3257	-	162	K11903	K11903, hcp; type VI secretion system secreted protein Hcp		184.964	323.793	189.301	23.6621	883.843	117.666	1.75058		0.127928	EET	4.77847
M1geoA	M_contig_135	243	3020	+	926	K01870	IARS, ileS; isoleucyl-tRNA synthetase [EC:6.1.1.5]		76.702	59.7685	74.8965	11.8274	175.09	124.774	0.77923		0.154199	EET	2.28273
M1geoA	M_contig_135	3023	3505	+	161	K03101	lspA; signal peptidase II [EC:3.4.23.36]		51.6979	46.1769	29.3042	10.2039	52.3137	118.706	0.893207		0.197375	EET	1.01191
M1geoA	M_contig_135	5630	6238	-	203	K07304	msrA; peptide-methionine (S)-S-oxide reductase [EC:1.8.4.11]		16.4007	34.5885	25.5654	13.4879	93.3528	137.755	2.10896		0.822397		5.692	AcPro
M1geoA	M_contig_135	6352	6756	-	135				57.5443	61.1892	38.4427	8.11273	155.972	137.767	1.06334		0.140982	EET	2.71047
M1geoA	M_contig_135	6874	7278	-	135	K01849	E5.4.99.2B, mcmA2; methylmalonyl-CoA mutase, C-terminal domain [EC:5.4.99.2]		110.978	79.546	24.4635	20.2818	171.569	119.186	0.716771		0.182755	EET	1.54597
M1geoA	M_contig_135	22344	22838	-	165				104.252	157.701	28.5938	19.9131	280.75	149.486	1.51269		0.191008	EET	2.69299
M1geoA	M_contig_135	24093	24584	-	164				98.121	113.331	23.0145	13.3563	192.588	159.086	1.15501		0.136121	EET	1.96276
M1geoA	M_contig_1371	1	210	-	70				47.5621	47.2031	40.4397	39.1149	330.884	154.247	0.992452		0.822397		6.95688	AcPro
M1geoA	M_contig_138	2285	2812	+	176				107.195	166.619	99.1846	283.139	1052.81	141.112	1.55436		2.64135		9.82148	AcPro
M1geoA	M_contig_138	2938	3216	+	93			3115 (1)	29.8329	106.588	40.5847	35.3296	226.411	136.81	3.57283		1.18425		7.58933	AcPro
M1geoA	M_contig_138	3338	5407	-	690	K15987	hppA; K(+)-stimulated pyrophosphate-energized sodium pump [EC:3.6.1.1]		299.159	188.556	147.693	25.3964	332.628	146.516	0.630287		0.0848926	EET	1.11188
M1geoA	M_contig_138	19815	22190	-	792	K13380	nuoBCD; NADH-quinone oxidoreductase subunit B/C/D [EC:1.6.5.3]		19.6174	37.0264	27.998	21.4342	111.662	136.926	1.88743		1.09261		5.692	AcPro
M1geoA	M_contig_138	22183	22596	-	138	K00330	nuoA; NADH-quinone oxidoreductase subunit A [EC:1.6.5.3]		32.1676	32.9224	27.3505	27.7773	198.356	118.211	1.02347		0.863517		6.16633	AcPro
M1geoA	M_contig_138	22620	22829	-	70	K03671	trxA; thioredoxin 1		15.854	47.2031	47.1797	23.469	300.804	112.064	2.97736		1.48032		18.9733	AcPro
M1geoA	M_contig_139	1	1191	-	397	K02358	tuf, TUFM; elongation factor Tu		2598.34	1877.87	979.246	411.052	4778.76	268.315	0.722718		0.158198	EET	1.83916
M1geoA	M_contig_139	1854	2492	-	213	K03089	SIG3.3.1, rpoH; RNA polymerase sigma-32 factor		62.5229	145.432	135.116	102.837	474.507	146.42	2.32606		1.64479		7.58933	AcPro
M1geoA	M_contig_1399	9175	9633	-	153				217.604	213.262	67.8401	3.57914	536.728	117.571	0.980046		0.0164479	EET	2.46653
M1geoA	M_contig_140	11407	11898	-	164	K03408	cheW; purine-binding chemotaxis protein CheW		64.2862	30.2215	14.3841	23.3736	12.8392	139.478	0.470109		0.363586		0.199719	SUC
M1geoA	M_contig_1402	441	932	-	164				50.7522	32.74	34.5217	73.4598	410.854	131.472	0.645094		1.44742		8.09528	AcPro
M1geoA	M_contig_1404	3	119	-	39	K00135	E1.2.1.16, gabD; succinate-semialdehyde dehydrogenase (NADP+) [EC:1.2.1.16]		71.1399	137.676	12.0974	14.0413	107.981	111.688	1.93528		0.197375	EET	1.51787
M1geoA	M_contig_1404	1528	1887	+	120	K03413	cheY; two-component system, chemotaxis family, response regulator CheY		143.347	130.792	66.8379	18.2536	315.844	149.428	0.912416		0.127339	EET	2.20335
M1geoA	M_contig_142	3	176	-	58	K00240	sdhB; succinate dehydrogenase iron-sulfur subunit [EC:1.3.99.1]		449.653	591.056	227.764	349.337	4102.34	122.587	1.31447		0.776903		9.12334	AcPro
M1geoA	M_contig_142	176	2092	-	639	K00239	sdhA; succinate dehydrogenase flavoprotein subunit [EC:1.3.99.1]		620.888	537.129	293.858	299.085	4764.84	134.264	0.865099		0.481706		7.67424	AcPro
M1geoA	M_contig_142	2103	2771	-	223	K00241	sdhC; succinate dehydrogenase cytochrome b556 subunit		395.64	455.626	173.486	83.492	3436.98	141.658	1.15162		0.21103		8.68716	AcPro
M1geoA	M_contig_142	6737	7009	+	91			ppcA (3)	359.765	644.504	440.689	252.743	3239.42	120.205	1.79146		0.702522		9.00429	AcPro
M1geoA	M_contig_142	7088	9211	-	708	K00962	pnp, PNPT1; polyribonucleotide nucleotidyltransferase [EC:2.7.7.8]		358.171	349.44	287.21	50.2748	437.185	133.582	0.975622		0.140365	EET	1.2206
M1geoA	M_contig_142	9407	9682	-	92	K02956	RP-S15, MRPS15, rpsO; small subunit ribosomal protein S15		506.64	1180.72	451.284	89.2841	1487.67	129.7	2.33049		0.176228	EET	2.93635
M1geoA	M_contig_142	11756	12127	-	124	K02834	rbfA; ribosome-binding factor A		102.923	119.911	110.34	13.2486	67.9234	135.279	1.16505		0.128723	EET	0.659942
M1geoA	M_contig_142	15473	16654	-	394	K02600	nusA; N utilization substance protein A		188.719	141.519	118.548	22.2379	192.392	140.758	0.749894		0.117836	EET	1.01946
M1geoA	M_contig_1436	1619	1795	-	59	K14155	patB, malY; cystathione beta-lyase [EC:4.4.1.8]		65.8345	252.017	303.869	139.223	606.706	111.677	3.82803		2.11474		9.21561	AcPro
M1geoA	M_contig_150	471	1007	-	179	K05520	pfpI; protease I [EC:3.2.-.-]		37.1994	73.8372	76.4364	61.1854	352.898	125.225	1.9849		1.64479		9.48666	AcPro
M1geoA	M_contig_150	3490	4218	+	243			na (1)	22.835	8.4985	19.4155	27.0424	121.312	135.068	0.37217		1.18425		5.31253	AcPro
M1geoA	M_contig_150	5245	5637	-	131	K02996	RP-S9, MRPS9, rpsI; small subunit ribosomal protein S9		694.673	551.754	241.301	75.244	916.188	149.514	0.794264		0.108316	EET	1.31888
M1geoA	M_contig_150	5658	6125	-	156	K02871	RP-L13, MRPL13, rplM; large subunit ribosomal protein L13		487.308	405.084	120.974	59.6754	877.344	158.45	0.831269		0.122459	EET	1.80039
M1geoA	M_contig_150	8144	9655	+	504	K02434	gatB, PET112; aspartyl-tRNA(Asn)/glutamyl-tRNA(Gln) amidotransferase subunit B [EC:6.3.5.6 6.3.5.7]		62.7555	66.3794	46.8052	8.69221	71.0231	150.162	1.05774		0.138509	EET	1.13174
M1geoA	M_contig_150	9684	10031	+	116	K03413	cheY; two-component system, chemotaxis family, response regulator CheY		28.7013	78.3327	52.8738	0	235.975	136.018	2.72924		ZERO		8.22177	AcPro
M1geoA	M_contig_150	13620	14105	+	162	K09767	K09767; hypothetical protein		95.9071	53.5405	61.1589	10.1409	207.963	153.849	0.558254		0.105737	EET	2.16838
M1geoA	M_contig_150	14121	15467	+	449	K14441	rimO; ribosomal protein S12 methylthiotransferase [EC:2.-.-.-]		76.6219	75.4303	50.4371	12.1962	117.24	154.566	0.984448		0.159174	EET	1.53011
M1geoA	M_contig_150	15605	16042	+	146	K06204	dksA; DnaK suppressor protein		68.4112	65.0659	29.0834	11.2522	158.643	144.603	0.9511		0.164479	EET	2.31896
M1geoA	M_contig_1500	150	569	+	140				7.92702	17.7012	26.9598	11.7345	60.1607	120.557	2.23302		1.48032		7.58933	AcPro
M1geoA	M_contig_151	2233	3000	-	256	K00059	fabG; 3-oxoacyl-[acyl-carrier protein] reductase [EC:1.1.1.100]		13.0053	19.3606	16.5866	14.9737	106.926	84.5475	1.48868		1.15136		8.22177	AcPro
M1geoA	M_contig_151	6739	8265	-	509	K00382	DLD, lpd, pdhD; dihydrolipoamide dehydrogenase [EC:1.8.1.4]		25.0737	47.064	42.6378	36.579	169.608	130.174	1.87703		1.45886		6.7644	AcPro
M1geoA	M_contig_1529	1570	1644	+	25				0	66.0843	0	21.9044	84.225	69.5265	∞	SP+	∞		∞	AcPro
M1geoA	M_contig_155	10529	11908	+	460	K05364	E2.4.1.129; peptidoglycan glycosyltransferase [EC:2.4.1.129]		55.4891	72.7287	27.6924	4.76182	59.5068	143.408	1.31068		0.0858154	EET	1.07241
M1geoA	M_contig_155	11966	12757	-	264	K03269	lpxH; UDP-2,3-diacylglucosamine hydrolase [EC:3.6.1.54]		58.8521	79.7893	50.0391	8.29711	55.831	136.493	1.35576		0.140982	EET	0.948666
M1geoA	M_contig_155	12756	13211	+	152				98.5662	84.2358	86.91	10.8081	96.9696	144.634	0.854611		0.109653	EET	0.983802
M1geoA	M_contig_1563	376	735	-	120	K06013	STE24; STE24 endopeptidase [EC:3.4.24.84]		13.8723	20.6514	19.6582	0	87.7344	109.629	1.48868		ZERO		6.32444	AcPro
M1geoA	M_contig_1615	448	1179	-	244	K01057	PGLS, pgl, devB; 6-phosphogluconolactonase [EC:3.1.1.31]		9.09658	16.9273	11.6016	8.9772	69.0369	109.647	1.86085		0.986877		7.58933	AcPro
M1geoA	M_contig_1615	1176	2684	-	503	K00036	G6PD, zwf; glucose-6-phosphate 1-dehydrogenase [EC:1.1.1.49]		4.41265	13.138	10.3176	11.9755	54.4197	123.167	2.97736		2.71391		12.3327	AcPro
M1geoA	M_contig_1615	2699	3724	-	342	K00033	E1.1.1.44, PGD, gnd; 6-phosphogluconate dehydrogenase [EC:1.1.1.44]		16.2249	18.1152	17.9338	12.8096	92.352	128.494	1.11651		0.789501		5.692	AcPro
M1geoA	M_contig_163	638	2296	-	553	K00666	K00666; fatty-acyl-CoA synthase [EC:6.2.1.-]		77.2633	53.0288	44.3643	12.8733	171.344	140.538	0.686339		0.166616	EET	2.21766
M1geoA	M_contig_1640	427	561	+	45	K07180	prkA; serine protein kinase		12.3309	27.5351	41.9375	48.6764	187.167	119.691	2.23302		3.94751		15.1787	AcPro
M1geoA	M_contig_169	3230	4618	+	463	K01154	hsdS; type I restriction enzyme, S subunit [EC:3.1.21.3]		3.59541	8.0286	6.114	1.18274	50.0257	99.4285	2.23302		0.328959		13.9138	AcPro
M1geoA	M_contig_169	9454	9867	-	138	K00940	E2.7.4.6, ndk; nucleoside-diphosphate kinase [EC:2.7.4.6]		225.173	203.521	27.3505	19.8409	396.712	142.844	0.90384		0.088114	EET	1.76181
M1geoA	M_contig_169	10045	10899	+	285	K03799	htpX; heat shock protein HtpX [EC:3.4.24.-]		48.6747	108.691	145.678	124.893	347.243	138.58	2.23302		2.56588		7.13397	AcPro
M1geoA	M_contig_169	18409	19635	-	409	K02004	ABC.CD.P; putative ABC transport system permease protein		10.8536	22.2166	32.2991	10.7112	66.927	120.565	2.04693		0.986877		6.16633	AcPro
M1geoA	M_contig_169	19640	20308	-	223	K02003	ABC.CD.A; putative ABC transport system ATP-binding protein		14.9298	16.6693	33.8509	14.7339	84.9804	89.4908	1.11651		0.986877		5.692	AcPro
M1geoA	M_contig_17	1	204	-	68	K01067	E3.1.2.1, ACH1; acetyl-CoA hydrolase [EC:3.1.2.1]		236.645	546.654	173.455	88.5838	3653.88	128.456	2.31002		0.374333		15.4404	AcPro
M1geoA	M_contig_17	261	776	-	172	K03712	marR; MarR family transcriptional regulator, multiple antibiotic resistance protein MarR		45.1656	105.658	32.9161	35.0215	416.228	138.089	2.33935		0.775403		9.21561	AcPro
M1geoA	M_contig_17	1106	1702	-	199	K03386	E1.11.1.15, PRDX, ahpC; peroxiredoxin (alkyl hydroperoxide reductase subunit C) [EC:1.11.1.15]		30.6724	66.4164	26.0792	27.518	412.66	154.159	2.16535		0.897161		13.4538	AcPro
M1geoA	M_contig_17	5668	6048	+	127	K03892	arsR; ArsR family transcriptional regulator		336.43	107.322	59.439	12.9356	116.058	124.2	0.319002		0.0384497	EET	0.344969
M1geoA	M_contig_17	6051	6374	+	108				303.135	217.987	109.212	25.3523	175.469	128.684	0.719107		0.0836336	EET	0.578847
M1geoA	M_contig_17	6411	6809	+	133	K04488	iscU, nifU; nitrogen fixation protein NifU and related proteins		171.057	59.0039	53.2102	8.23472	31.6635	142.149	0.344938		0.0481403	EET	0.185106	SUC
M1geoA	M_contig_17	6869	7744	+	292	K03593	mrp; ATP-binding protein involved in chromosome partitioning		165.327	56.5791	59.7825	22.5045	79.3215	131.13	0.342225		0.136121	EET	0.479785
M1geoA	M_contig_17	7795	8439	+	215	K09687	: No such data.		67.1031	26.8948	26.3329	2.54702	29.3808	130.867	0.400798		0.0379568	EET	0.437846
M1geoA	M_contig_17	9287	9880	-	198	K07275	ompW; outer membrane protein		123.309	337.931	259.727	44.2512	840.123	129.63	2.74052		0.358864		6.81315	AcPro
M1geoA	M_contig_17	13141	13611	-	157				70.6868	97.3376	24.0406	3.48796	147.528	130.991	1.37703		0.0493438	EET	2.08707
M1geoA	M_contig_17	15944	17176	+	411			extD (8)	55.3541	94.4636	92.9819	41.3039	281.775	139.787	1.70653		0.746175		5.0904	AcPro
M1geoA	M_contig_17	18183	18818	-	212	K01091	E3.1.3.18, gph; phosphoglycolate phosphatase [EC:3.1.3.18]		15.7045	23.3789	44.5091	5.16612	79.4576	135.64	1.48868		0.328959		5.05955	AcPro
M1geoA	M_contig_17	21915	22211	-	99				50.4446	33.3759	33.3594	0	85.0758	125.194	0.661635		ZERO	EET	1.68652
M1geoA	M_contig_17	22260	22415	-	52				96.0388	47.657	63.5111	10.5309	121.478	116.749	0.496226		0.109653	EET	1.26489
M1geoA	M_contig_170	358	1194	-	279	K14540	rbgA; ribosome biogenesis GTPase A		21.8774	41.4507	42.2757	19.6276	143.394	131.645	1.89468		0.897161		6.55442	AcPro
M1geoA	M_contig_170	3268	4407	+	380	K07164	K07164		65.7108	199.992	76.9774	8.64646	243.809	139.629	3.04352		0.131584	EET	3.71034
M1geoA	M_contig_170	4464	5162	+	233	K07164	K07164		273.873	395.301	192.364	2.35025	831.406	149.255	1.44337		0.00858154	EET	3.03573
M1geoA	M_contig_170	5683	6189	+	169				88.6512	149.081	139.585	6.48058	299.024	136.989	1.68165		0.073102	EET	3.37303
M1geoA	M_contig_170	6262	6606	+	115				67.552	136.479	188.719	33.3327	970.419	138.556	2.02035		0.493438		14.3655	AcPro
M1geoA	M_contig_1716	4735	5802	-	356	K02835	prfA, MTRF1, MRF1; peptide chain release factor 1		127.812	102.097	103.371	18.4587	130.123	145.254	0.798803		0.144421	EET	1.01808
M1geoA	M_contig_1716	5990	6946	-	319	K09153	K09153; hypothetical protein		149.594	138.539	112.403	12.0165	224.424	144.024	0.926096		0.0803272	EET	1.50022
M1geoA	M_contig_172	1	522	-	174	K06872	K06872; uncharacterized protein		63.7806	78.3327	29.8262	12.5887	157.317	132.59	1.22816		0.197375	EET	2.46653
M1geoA	M_contig_172	4862	5248	-	129				17.2059	12.807	10.972	12.7351	163.227	133	0.744339		0.740158		9.48666	AcPro
M1geoA	M_contig_172	8405	10282	+	626				91.3	99.6279	42.9591	6.9982	141.272	149.773	1.09122		0.0766506	EET	1.54734
M1geoA	M_contig_172	12184	12561	-	126			3984 (1)	66.0585	59.0039	3.74442	4.3461	133.691	130.251	0.893207		0.0657918	EET	2.02382
M1geoA	M_contig_172	14564	16816	-	751	K00029	E1.1.1.40, maeB; malate dehydrogenase (oxaloacetate-decarboxylating)(NADP+) [EC:1.1.1.40]		447.755	363.53	219.879	88.23	950.475	150.039	0.811895		0.19705	EET	2.12276
M1geoA	M_contig_172	17035	17526	+	164	K01518	E3.6.1.17; bis(5'-nucleosidyl)-tetraphosphatase [EC:3.6.1.17]		20.3009	20.1477	11.5072	23.3736	154.07	134.011	0.992452		1.15136		7.58933	AcPro
M1geoA	M_contig_172	17540	18484	+	315	K00845	glk; glucokinase [EC:2.7.1.2]		22.9003	35.4023	17.9732	41.7226	147.06	136.995	1.54593		1.82193		6.42174	AcPro
M1geoA	M_contig_173	1	177	+	59				0	49.0032	55.9759	9.28151	71.3771	124.112	∞		∞		∞	AcPro
M1geoA	M_contig_173	231	878	-	216	K03100	lepB; signal peptidase I [EC:3.4.21.89]		25.6894	43.9797	48.0534	20.2818	185.217	151.804	1.71198		0.789501		7.20986	AcPro
M1geoA	M_contig_173	1087	1653	-	189	K03088	SIG3.2, rpoE; RNA polymerase sigma-70 factor, ECF subfamily		14.6797	41.5212	22.4665	28.974	111.409	146.005	2.82849		1.97375		7.58933	AcPro
M1geoA	M_contig_173	2794	3399	-	202	K07090	K07090		19.2289	55.2066	42.0413	16.2656	156.358	153.666	2.87102		0.845894		8.13142	AcPro
M1geoA	M_contig_173	15764	16384	+	207	K07220	K07220; hypothetical protein		67.0158	87.7932	45.5842	10.5818	91.5489	161.323	1.31004		0.1579	EET	1.36608
M1geoA	M_contig_1732	1237	1536	+	100	K00363	nirD; nitrite reductase (NAD(P)H) small subunit [EC:1.7.1.4]		16.6467	28.9119	23.5898	16.4283	84.225	134.015	1.73679		0.986877		5.05955	AcPro
M1geoA	M_contig_1739	2635	3543	-	303	K00957	cysD; sulfate adenylyltransferase subunit 2 [EC:2.7.7.4]		10.9879	24.5363	18.685	3.61458	55.5941	143.54	2.23302		0.328959		5.05955	AcPro
M1geoA	M_contig_176	104	1339	+	412	K02945	RP-S1, rpsA; small subunit ribosomal protein S1		80.8094	80.1994	56.1118	10.6332	102.215	99.5434	0.992452		0.131584	EET	1.26489
M1geoA	M_contig_176	4965	7046	-	694	K01269	E3.4.11.-; aminopeptidase [EC:3.4.11.-]		11.1938	16.6639	16.3157	18.1484	84.9532	140.295	1.48868		1.6213		7.58933	AcPro
M1geoA	M_contig_176	7051	8082	-	344				9.67833	14.4079	9.60052	12.7351	79.5731	145.294	1.48868		1.31584		8.22177	AcPro
M1geoA	M_contig_176	8094	8297	-	68	K03704	cspA; cold shock protein (beta-ribbon, CspA family)		122.402	103.257	76.3201	64.4246	1238.6	129.717	0.843584		0.526334		10.1191	AcPro
M1geoA	M_contig_176	8582	9022	+	147				52.8468	87.101	83.4471	67.0542	300.804	144.415	1.64818		1.26884		5.692	AcPro
M1geoA	M_contig_176	10850	11170	-	107			cycC (1)	5.1859	7.72013	0	5.11784	59.0362	132.093	1.48868		0.986877		11.384	AcPro
M1geoA	M_contig_176	11334	11813	+	160	K05919	E1.15.1.2; superoxide reductase [EC:1.15.1.2]		97.1059	160.048	79.6157	95.8316	842.25	147.714	1.64818		0.986877		8.67352	AcPro
M1geoA	M_contig_176	12083	12283	+	67	K03704	cspA; cold shock protein (beta-ribbon, CspA family)		1341.68	2120.62	232.378	49.0396	1477.08	128.987	1.58057		0.036551	EET	1.10092
M1geoA	M_contig_176	13848	15362	-	505	K00599	E2.1.1.-		13.1855	18.8111	7.47401	9.75937	79.2215	153.577	1.42665		0.740158		6.00822	AcPro
M1geoA	M_contig_176	15545	16483	+	313	K00926	arcC; carbamate kinase [EC:2.7.2.2]		7.09126	10.5566	3.01468	10.4973	67.2724	136.898	1.48868		1.48032		9.48666	AcPro
M1geoA	M_contig_176	19336	19707	+	124				8.94986	13.3235	22.8289	22.081	67.9234	88.5519	1.48868		2.46719		7.58933	AcPro
M1geoA	M_contig_18	13546	14415	-	290	K15539	rodZ; cytoskeleton protein RodZ		55.4891	91.1508	27.6571	7.55323	94.3901	163.71	1.64268		0.136121	EET	1.70106
M1geoA	M_contig_18	15294	16211	-	306	K00852	rbsK, RBKS; ribokinase [EC:2.7.1.15]		50.7743	63.4388	29.2946	5.36872	61.9302	149.602	1.24943		0.105737	EET	1.21971
M1geoA	M_contig_18	16230	17165	-	312	K00772	E2.4.2.28, mtaP; 5'-methylthioadenosine phosphorylase [EC:2.4.2.28]		83.5894	103.257	39.3164	15.7964	168.72	146.758	1.23529		0.188976	EET	2.01844
M1geoA	M_contig_18	17295	17453	-	53				10.4696	70.1367	0	0	0	119.134	6.69905	SP+	ZERO		ZERO
M1geoA	M_contig_18	17519	18865	+	449	K11927	rhlE; ATP-dependent RNA helicase RhlE [EC:3.6.4.13]		174.253	152.7	67.2494	6.0981	168.825	146.81	0.876314		0.0349956	EET	0.96885
M1geoA	M_contig_18	21237	21962	-	242	K00945	cmk; cytidylate kinase [EC:2.7.4.14]		25.2223	51.2017	38.9915	92.7768	400.243	157.921	2.03002		3.67836		15.8686	AcPro
M1geoA	M_contig_18	22775	24361	+	529	K01067	E3.1.2.1, ACH1; acetyl-CoA hydrolase [EC:3.1.2.1]		542.304	389.604	196.21	601.438	6137.76	153.217	0.718424		1.10904		11.3179	AcPro
M1geoA	M_contig_18	25253	25954	+	234				56.9119	56.4823	32.2596	9.36084	107.981	161.527	0.992452		0.164479	EET	1.89733
M1geoA	M_contig_18	35958	36137	+	60				147.971	240.932	86.4961	27.3805	350.938	98.0878	1.62824		0.185039	EET	2.37167
M1geoA	M_contig_18	52470	52928	+	153				58.0278	40.4929	43.171	7.15829	137.623	91.0738	0.697818		0.12336	EET	2.37167
M1geoA	M_contig_183	22478	22870	-	131	K13993	HSP20; HSP20 family protein		46.5939	81.9748	104.444	150.488	337.543	144.225	1.75935		3.22978		7.24436	AcPro
M1geoA	M_contig_1830	1243	2922	-	560	K06281	E1.12.99.6L; hydrogenase large subunit [EC:1.12.99.6]		878.908	716.897	672.311	272.827	82.721	129.466	0.815668		0.310416		0.0941179	SUC
M1geoA	M_contig_1830	3107	4441	-	445	K00185	K00185; prokaryotic molybdopterin-containing oxidoreductase family, membrane subunit		463.864	402.817	399.702	239.964	23.6587	134.791	0.868396		0.517314		0.0510036	SUC
M1geoA	M_contig_1830	4428	5381	-	318	K00124	E1.2.1.2B1; formate dehydrogenase, beta subunit		575.83	493.554	492.568	396.069	33.1073	152.493	0.857118		0.687823		0.0574949	SUC
M1geoA	M_contig_1830	5359	6471	-	371	K06282	E1.12.99.6S; hydrogenase small subunit [EC:1.12.99.6]		770.267	719.179	495.959	540.229	56.7554	148.369	0.933676		0.701353		0.0736828	SUC
M1geoA	M_contig_1850	3	1664	+	554	K03695	clpB; ATP-dependent Clp protease ATP-binding subunit ClpB		9.01448	20.1295	36.6196	56.3425	117.824	116.716	2.23302		6.25022	OC	13.0705	AcPro
M1geoA	M_contig_1853	66	566	+	167	K03409	cheX; chemotaxis protein CheX		9.9681	64.3036	36.7267	39.3492	63.0427	133.635	6.45094	SP+	3.94751		6.32444	AcPro
M1geoA	M_contig_1853	1393	1983	+	197	K07323	ttg2; putative toluene tolerance protein		25.3504	35.6419	21.5542	22.2379	160.327	152.882	1.40597		0.877224		6.32444	AcPro
M1geoA	M_contig_1854	4543	5226	+	228	K05799	pdhR; GntR family transcriptional regulator, transcriptional repressor for pyruvate dehydrogenase complex		63.2771	97.8222	47.5935	0	360.173	157.344	1.54593		ZERO	EET	5.692	AcPro
M1geoA	M_contig_1854	6643	7359	+	239	K00991	ispD; 2-C-methyl-D-erythritol 4-phosphate cytidylyltransferase [EC:2.7.7.60]		23.2172	15.5533	23.6885	6.87375	176.203	133.041	0.669905		0.296063		7.58933	AcPro
M1geoA	M_contig_1854	7356	8522	+	389	K00936	E2.7.3.-		27.1026	45.656	35.1725	11.2619	178.626	153.065	1.68456		0.415527		6.59073	AcPro
M1geoA	M_contig_1854	8531	9043	+	171	K03981	dsbC; thiol:disulfide interchange protein DsbC [EC:5.3.4.1]		35.6947	67.6302	52.4219	9.60718	184.704	146.449	1.89468		0.269148		5.17454	AcPro
M1geoA	M_contig_1854	9176	11509	-	778				51.3524	43.5324	42.4496	35.8973	362.666	124.322	0.847719		0.699038		7.06229	AcPro
M1geoA	M_contig_1854	11736	12590	-	285	K00529	hcaD; ferredoxin--NAD+ reductase [EC:1.18.1.3]		93.4553	39.1289	13.2434	3.84287	177.316	84.3591	0.418691		0.0411199	EET	1.89733
M1geoA	M_contig_187	18	1727	-	570				84.6939	49.2734	40.558	8.64646	11.0822	93.3536	0.581782		0.102091	EET	0.13085	SUC
M1geoA	M_contig_19	11716	13026	+	437	K03545	tig; trigger factor		326.332	225.889	110.122	26.3153	371.014	150.461	0.692206		0.0806397	EET	1.13692
M1geoA	M_contig_19	15105	15386	+	94	K03530	hupB; DNA-binding protein HU-beta		1239.65	1269.84	356.357	122.338	2217.63	141.685	1.02435		0.0986877	EET	1.78891
M1geoA	M_contig_19	15780	16262	+	161	K02614	paaI; acyl-CoA thioesterase [EC:3.1.2.-]		17.2326	69.2654	26.3737	13.6052	91.5489	137.105	4.01943		0.789501		5.31253	AcPro
M1geoA	M_contig_19	21329	21796	+	156				0	2.64761	0	21.0619	53.9904	91.8322	∞		∞		∞	AcPro
M1geoA	M_contig_192	7192	7449	-	86				51.6178	48.0264	98.7482	70.043	293.808	141.357	0.930424		1.35696		5.692	AcPro
M1geoA	M_contig_20	1	144	-	48				80.9216	94.652	68.8037	0	0	116.225	1.16968		ZERO	EET	ZERO	SUC
M1geoA	M_contig_20	1780	3429	-	550	K03406	mcp; methyl-accepting chemotaxis protein		104.925	75.8468	67.7672	5.97392	114.852	134.525	0.722868		0.0569352	EET	1.09461
M1geoA	M_contig_20	3576	3791	-	72				1102.08	3717.24	1015.67	152.114	1082.06	133.675	3.37295		0.138025	EET	0.981836
M1geoA	M_contig_20	3977	4945	-	323	K04015	nrfD; protein NrfD		371.073	118.921	140.224	42.3846	110.822	135.299	0.320479		0.114222	EET	0.298654
M1geoA	M_contig_20	4957	5502	-	182	K08358	ttrB; tetrathionate reductase subunit B		292.69	95.3139	134.799	21.0619	69.4162	132.501	0.325648		0.0719598	EET	0.237167
M1geoA	M_contig_20	5510	7654	-	715	K08352	phsA, psrA; thiosulfate reductase / polysulfide reductase chain A		325.95	142.682	172.882	26.0402	97.1827	141.559	0.437742		0.07989	EET	0.298152
M1geoA	M_contig_20	9762	11465	-	568				1346.2	935.128	851.394	222.707	1186.27	128.434	0.694644		0.165434	EET	0.881199
M1geoA	M_contig_20	11877	12908	-	344				61.2961	54.0297	31.5446	7.95943	91.8151	152.53	0.881454		0.129852	EET	1.49789
M1geoA	M_contig_20	14323	14637	+	105	K13641	iclR; IclR family transcriptional regulator, acetate operon repressor		68.7008	43.2695	4.4933	0	80.2143	144.226	0.629825		ZERO	EET	1.16759
M1geoA	M_contig_204	14688	15704	+	339	K03979	obg; GTP-binding protein		62.2002	68.2287	62.6279	6.46146	180.127	136.887	1.09692		0.103882	EET	2.89593
M1geoA	M_contig_204	15704	16825	+	374	K00931	proB; glutamate 5-kinase [EC:2.7.2.11]		63.7976	49.6958	52.9825	5.85678	129.49	132.205	0.778959		0.0918025	EET	2.0297
M1geoA	M_contig_204	18215	19963	-	583	K03086	SIG1, rpoD; RNA polymerase primary sigma factor		178.936	141.69	144.857	32.8753	195.032	150.13	0.79185		0.183727	EET	1.08996
M1geoA	M_contig_2068	271	471	+	67	K03704	cspA; cold shock protein (beta-ribbon, CspA family)		364.406	967.84	63.3757	49.0396	597.118	131.586	2.65594		0.134574	EET	1.63861
M1geoA	M_contig_2068	2149	2466	-	106				36.6438	38.9648	53.411	41.329	238.373	124.506	1.06334		1.12786		6.50514	AcPro
M1geoA	M_contig_2068	2683	4329	-	549	K04077	groEL, HSPD1; chaperonin GroEL		164.749	415.284	477.813	240.389	3191.04	136.303	2.52071		1.45912		19.3691	AcPro
M1geoA	M_contig_2068	4504	4791	-	96	K04078	groES, HSPE1; chaperonin GroES		127.163	378.608	221.155	171.128	3355.84	120.065	2.97736		1.34574		26.3902	AcPro
M1geoA	M_contig_2068	5824	6768	+	315	K00768	E2.4.2.21, cobU, cobT; nicotinate-nucleotide--dimethylbenzimidazole phosphoribosyltransferase [EC:2.4.2.21]		8.8078	11.8008	16.4754	10.4306	80.2143	114.671	1.33981		1.18425		9.10719	AcPro
M1geoA	M_contig_216	1	489	+	163	K00927	PGK, pgk; phosphoglycerate kinase [EC:2.7.2.3]		122.553	68.4155	43.4169	10.0787	219.605	107.738	0.558254		0.0822397	EET	1.79192
M1geoA	M_contig_216	689	994	+	102	K00927	PGK, pgk; phosphoglycerate kinase [EC:2.7.2.3]		146.883	93.1336	41.6291	21.4749	289.007	124.884	0.634067		0.146204	EET	1.9676
M1geoA	M_contig_216	9184	9672	+	163	K09763	K09763; hypothetical protein		6.80848	2.53391	2.89446	3.35957	51.6718	129.51	0.37217		0.493438		7.58933	AcPro
M1geoA	M_contig_218	10927	12144	-	406	K01893	NARS, asnS; asparaginyl-tRNA synthetase [EC:6.1.1.22]		16.4007	23.3981	2.32412	6.74395	82.9803	131.71	1.42665		0.411199		5.05955	AcPro
M1geoA	M_contig_218	14758	15627	-	290	K06178	rluB; 23S rRNA pseudouridine2605 synthase [EC:5.4.99.22]		61.2294	52.6966	32.5377	3.77661	159.737	131.724	0.860642		0.0616798	EET	2.60883
M1geoA	M_contig_2182	1	498	+	166	K13641	iclR; IclR family transcriptional regulator, acetate operon repressor		83.5679	39.8098	2.84215	0	101.476	120.32	0.476377		ZERO	EET	1.21429
M1geoA	M_contig_219	1	444	+	148	K02990	RP-S6, MRPS6, rpsF; small subunit ribosomal protein S6		438.664	368.376	178.518	55.5009	1024.36	131.791	0.839767		0.126523	EET	2.33518
M1geoA	M_contig_219	769	1728	+	320				227.159	203.932	157.757	35.9368	296.104	140.903	0.897752		0.158202	EET	1.30351
M1geoA	M_contig_219	8782	8946	+	55	K01676	E4.2.1.2A, fumA, fumB; fumarate hydratase, class I [EC:4.2.1.2]		232.045	292.874	77.2031	19.9131	957.102	122.74	1.26214		0.0858154	EET	4.12464
M1geoA	M_contig_2190	3	704	+	234	K08307	mltD, dniR; membrane-bound lytic murein transglycosylase D [EC:3.2.1.-]		71.1399	60.0125	28.2272	2.34021	98.9824	139.01	0.843584		0.0328959	EET	1.39138
M1geoA	M_contig_2190	832	1563	+	244				113.707	142.19	79.2774	13.4658	302.036	153.195	1.25049		0.118425	EET	2.65626
M1geoA	M_contig_2190	1908	2375	-	156				92.4818	116.495	66.5355	3.51031	269.952	122.3	1.25965		0.0379568	EET	2.91897
M1geoA	M_contig_221	3	773	-	257	K00873	PK, pyk; pyruvate kinase [EC:2.7.1.40]		21.5911	51.4275	33.0441	57.5309	221.214	126.009	2.38188		2.66457		10.2456	AcPro
M1geoA	M_contig_221	788	2722	-	645	K01681	ACO, acnA; aconitate hydratase [EC:4.2.1.3]		37.853	63.3949	63.6377	59.4304	313.395	131.285	1.67476		1.57003		8.27927	AcPro
M1geoA	M_contig_226	355	1005	-	217				12.7855	19.0335	10.8709	12.6177	67.9234	157.646	1.48868		0.986877		5.31253	AcPro
M1geoA	M_contig_226	2812	3036	+	75	K04085	tusA, sirA; tRNA 2-thiouridine synthesizing protein A [EC:2.8.1.-]		14.7971	22.0281	12.5813	14.6029	84.225	119.601	1.48868		0.986877		5.692	AcPro
M1geoA	M_contig_2262	1	843	+	281				9.87351	10.2889	25.1849	19.4879	74.9333	116.879	1.04207		1.97375		7.58933	AcPro
M1geoA	M_contig_239	3	854	-	284	K01879	glyS; glycyl-tRNA synthetase beta chain [EC:6.1.1.14]		166.077	173.064	102.998	25.0666	170.526	133.385	1.04207		0.150934	EET	1.02679
M1geoA	M_contig_239	854	1732	-	293	K01878	glyQ; glycyl-tRNA synthetase alpha chain [EC:6.1.1.14]		106.054	136.736	48.3069	13.0828	244.339	141.14	1.2893		0.12336	EET	2.3039
M1geoA	M_contig_239	1825	2493	-	223				54.7426	46.3035	19.0411	2.45565	28.3268	142.049	0.84584		0.044858	EET	0.517454
M1geoA	M_contig_239	2511	3434	-	308	K12339	cysM; cysteine synthase B [EC:2.5.1.47]		127.913	124.713	45.9542	14.2236	177.748	138.48	0.974979		0.111197	EET	1.3896
M1geoA	M_contig_239	3972	5273	+	434	K03628	rho; transcription termination factor Rho		280.003	225.547	108.709	16.403	237.732	143.787	0.805518		0.0585817	EET	0.849034
M1geoA	M_contig_239	5369	5569	+	67	K02909	RP-L31, rpmE; large subunit ribosomal protein L31	na (1)	364.406	628.788	183.085	40.8664	1131.38	128.548	1.72551		0.112145	EET	3.10473
M1geoA	M_contig_239	5650	6135	+	162	K03465	E2.1.1.148, thyX, thy1; thymidylate synthase (FAD) [EC:2.1.1.148]		95.9071	150.423	61.1589	10.1409	129.977	136.605	1.56843		0.105737	EET	1.35524
M1geoA	M_contig_240	1644	2495	-	284				15.6307	20.3605	4.98377	1.9282	81.5559	178.729	1.30259		0.12336		5.21766	AcPro
M1geoA	M_contig_240	4441	5463	+	341	K07282	pgsA, capA; poly-gamma-glutamate synthesis protein (capsule biosynthesis protein)		21.1542	31.4918	27.6714	4.81768	111.147	131.748	1.48868		0.227741		5.25415	AcPro
M1geoA	M_contig_246	2976	3449	+	158				59.7035	83.6511	32.8466	6.93176	146.594	172.23	1.40111		0.116103	EET	2.45537
M1geoA	M_contig_246	5522	9001	+	1160	K11891	impL, vasK, icmF; type VI secretion system protein ImpL		54.054	79.4009	32.5377	4.72077	63.5318	166.618	1.46892		0.0873342	EET	1.17534
M1geoA	M_contig_248	3	233	-	77	K01090	E3.1.3.16; protein phosphatase [EC:3.1.3.16]		50.4446	16.092	0	0	27.3458	116.07	0.319002		ZERO	EET	0.542095
M1geoA	M_contig_248	5134	5592	+	153	K01808	rpiB; ribose 5-phosphate isomerase B [EC:5.3.1.6]		29.0139	40.4929	49.3382	42.9497	261.483	133.223	1.39564		1.48032		9.01233	AcPro
M1geoA	M_contig_248	5694	7058	+	455	K00425	cydA; cytochrome d ubiquinol oxidase subunit I [EC:1.10.3.-]		6.0977	24.5093	11.4061	12.0354	64.7885	136.596	4.01943		1.97375		10.6251	AcPro
M1geoA	M_contig_25	8278	9315	+	346			cbcA (6)	1151.48	1221.18	433.617	132.946	1539.66	148.584	1.06053		0.115456	EET	1.33712
M1geoA	M_contig_25	9317	9976	+	220	K08354	phsC; thiosulfate reductase cytochrome b subunit		923.137	1282.26	619.77	179.218	1531.36	134.151	1.38903		0.19414	EET	1.65887
M1geoA	M_contig_25	11267	12061	+	265	K02482	K02482; two-component system, NtrC family, sensor kinase [EC:2.7.13.3]	1295 (1)	106.79	188.59	58.7521	14.4651	190.698	141.158	1.76598		0.135454	EET	1.78572
M1geoA	M_contig_25	16243	17526	-	428				35.0048	42.4607	55.1165	39.6633	305.02	107.626	1.213		1.13308		8.71367	AcPro
M1geoA	M_contig_250	7789	8136	+	116				52.619	142.423	239.966	75.5323	381.191	107.794	2.70669		1.43546		7.24436	AcPro
M1geoA	M_contig_250	8433	8732	+	100				16.6467	20.6514	56.6156	10.9522	84.225	64.126	1.24057		0.657918		5.05955	AcPro
M1geoA	M_contig_2531	630	1106	+	159	K01710	E4.2.1.46, rfbB, rffG; dTDP-glucose 4,6-dehydratase [EC:4.2.1.46]		10.4696	20.7812	5.93455	3.44408	105.943	148.318	1.9849		0.328959		10.1191	AcPro
M1geoA	M_contig_26	1212	2447	+	412	K12600	SKI3, TTC37; superkiller protein 3		92.9308	130.324	75.5791	11.9623	235.094	148.185	1.40238		0.128723	EET	2.52978
M1geoA	M_contig_260	9968	10336	+	123				85.7149	60.443	49.8647	0	85.5945	80.6795	0.705163		ZERO	EET	0.998596
M1geoA	M_contig_260	11299	12768	-	490			ctcC (5)	28.3108	52.2606	42.3654	65.9366	309.398	130.32	1.84596		2.32903		10.9286	AcPro
M1geoA	M_contig_268	4935	6293	-	453	K03431	glmM; phosphoglucosamine mutase [EC:5.4.2.10]		84.5198	62.9114	38.5353	6.04425	162.686	134.247	0.744339		0.0715128	EET	1.92483
M1geoA	M_contig_268	8812	10614	-	601	K03798	ftsH, hflB; cell division protease FtsH [EC:3.4.24.-]		120.026	118.204	105.193	23.6902	248.751	141.444	0.984818		0.197375	EET	2.07247
M1geoA	M_contig_269	20274	20624	-	117				203.934	144.736	100.811	28.0825	395.93	134.066	0.709719		0.137704	EET	1.94146
M1geoA	M_contig_269	20640	20930	-	97	K04764	ihfA, himA; integration host factor subunit alpha		406.157	361.931	145.917	56.4545	911.714	139.309	0.89111		0.138997	EET	2.24473
M1geoA	M_contig_269	21014	23422	-	803	K01890	FARSB, pheT; phenylalanyl-tRNA synthetase beta chain [EC:6.1.1.20]		119.547	130.646	90.4816	16.3669	157.332	133.967	1.09284		0.136908	EET	1.31607
M1geoA	M_contig_269	23522	24538	-	339	K01889	FARSA, pheS; phenylalanyl-tRNA synthetase alpha chain [EC:6.1.1.20]		258.622	300.937	179.533	33.9227	416.156	141.555	1.16362		0.131167	EET	1.60913
M1geoA	M_contig_269	24734	25087	-	118	K02887	RP-L20, MRPL20, rplT; large subunit ribosomal protein L20		620.726	504.033	283.878	116.019	963.591	138.478	0.812006		0.186908	EET	1.55236
M1geoA	M_contig_269	25162	25359	-	66	K02916	RP-L35, MRPL35, rpmI; large subunit ribosomal protein L35		748.262	901.15	571.875	99.5653	1563.27	119.298	1.20432		0.133062	EET	2.0892
M1geoA	M_contig_269	25407	25871	-	155	K02520	infC, MTIF3; translation initiation factor IF-3		293.555	306.439	155.236	38.8626	434.71	142.068	1.04389		0.132386	EET	1.48084
M1geoA	M_contig_269	25979	27889	-	637	K01868	TARS, thrS; threonyl-tRNA synthetase [EC:6.1.1.3]		187.287	146.537	71.8435	17.1934	284.276	137.574	0.782422		0.0918025	EET	1.51787
M1geoA	M_contig_275	5418	7274	+	619	K01596	E4.1.1.32, pckA, PEPCK; phosphoenolpyruvate carboxykinase (GTP) [EC:4.1.1.32]		665.152	529.796	270.578	56.6187	1466.11	155.493	0.796503		0.0851214	EET	2.20418
M1geoA	M_contig_275	7468	9060	+	531	K01610	E4.1.1.49, pckA; phosphoenolpyruvate carboxykinase (ATP) [EC:4.1.1.49]		98.2293	148.565	62.1955	84.5649	543.259	158.133	1.51243		0.860892		5.53052	AcPro
M1geoA	M_contig_275	9117	9452	-	112	K04651	hypA, hybF; hydrogenase nickel incorporation protein HypA/HybF		89.1789	140.134	71.612	14.6681	263.203	127.791	1.57138		0.164479	EET	2.95141
M1geoA	M_contig_275	14122	14478	+	119				9.3259	17.3541	31.7174	18.407	88.4717	149.015	1.86085		1.97375		9.48666	AcPro
M1geoA	M_contig_275	15692	15868	+	59	K09892	K09892; hypothetical protein		103.454	119.008	71.969	18.563	249.82	132.82	1.15034		0.179432	EET	2.41479
M1geoA	M_contig_275	23598	23999	-	134				53.8327	107.88	31.6879	8.17327	94.2817	143.325	2.00399		0.151827	EET	1.75138
M1geoA	M_contig_275	24004	24189	-	62				71.5989	26.6469	15.2193	8.83241	67.9234	124.375	0.37217		0.12336	EET	0.948666
M1geoA	M_contig_275	24190	24894	-	235	K00655	plsC; 1-acyl-sn-glycerol-3-phosphate acyltransferase [EC:2.3.1.51]		101.533	145.878	62.237	13.9815	197.122	149.45	1.43675		0.137704	EET	1.94146
M1geoA	M_contig_28	4193	5215	-	341	K00946	thiL; thiamine-monophosphate kinase [EC:2.7.4.16]		13.018	44.8153	47.0413	12.8471	104.973	136.122	3.44257		0.986877		8.06366	AcPro
M1geoA	M_contig_28	12910	13119	+	70				71.3431	29.5019	53.9196	7.82299	120.321	118.574	0.413522		0.109653	EET	1.68652
M1geoA	M_contig_281	701	1894	+	398	K03585	acrA; membrane fusion protein		20.913	17.6419	18.9667	17.8867	116.391	121.591	0.843584		0.855293		5.56551	AcPro
M1geoA	M_contig_282	5942	6955	-	338	K13694	spr; lipoprotein Spr		254.462	356.816	142.377	40.5036	392.469	154.302	1.40224		0.159174	EET	1.54235
M1geoA	M_contig_282	9437	10033	-	199	K08591	plsY; glycerol-3-phosphate acyltransferase PlsY [EC:2.3.1.15]		50.1912	53.9633	42.6751	2.7518	74.0672	139.961	1.07516		0.0548265	EET	1.4757
M1geoA	M_contig_282	10045	10455	-	137				56.7042	39.1924	24.1064	7.99429	61.4781	152.841	0.691172		0.140982	EET	1.08419
M1geoA	M_contig_282	10455	11198	-	248	K05807	bamD; outer membrane protein assembly factor BamD		73.8363	64.9518	24.7313	4.4162	59.433	152.747	0.879673		0.0598107	EET	0.804929
M1geoA	M_contig_282	14999	16765	+	589	K00311	E1.5.5.1, etf; electron-transferring-flavoprotein dehydrogenase [EC:1.5.5.1]		81.9618	92.5629	57.673	15.8054	139.422	144.62	1.12934		0.192838	EET	1.70106
M1geoA	M_contig_300	1	1527	+	509	K00341	nuoL; NADH-quinone oxidoreductase subunit L [EC:1.6.5.3]		9.81143	41.3839	34.2957	5.37926	111.693	135.116	4.21792		0.548265		11.384	AcPro
M1geoA	M_contig_300	1530	3026	+	499	K00342	nuoM; NADH-quinone oxidoreductase subunit M [EC:1.6.5.3]		10.0081	22.3482	17.0187	4.38965	67.515	128.451	2.23302		0.438612		6.74607	AcPro
M1geoA	M_contig_300	6794	8725	+	644	K15022	fdhB; formate dehydrogenase beta subunit [EC:1.2.1.43]		179.219	215.492	125.275	17.0065	755.279	143.836	1.20239		0.094892	EET	4.21427
M1geoA	M_contig_305	6472	6657	+	62				8.94986	19.9852	22.8289	0	67.9234	108.789	2.23302		ZERO		7.58933	AcPro
M1geoA	M_contig_305	9751	10206	+	152			ctcD (3)	83.9638	32.6074	21.7275	10.8081	13.8528	120.383	0.388351		0.128723	EET	0.164985	SUC
M1geoA	M_contig_305	13259	14185	+	309	K02662	pilM; type IV pilus assembly protein PilM		52.0772	65.4962	42.7518	5.31659	88.5862	137.76	1.25768		0.102091	EET	1.70106
M1geoA	M_contig_305	15941	18484	+	848	K02453	gspD; general secretion pathway protein D		59.5461	56.499	45.0655	7.74919	116.703	122.649	0.948828		0.130138	EET	1.95988
M1geoA	M_contig_305	19172	19591	+	140	K02456	gspG; general secretion pathway protein G		95.1242	118.008	101.099	7.82299	150.402	127.25	1.24057		0.0822397	EET	1.58111
M1geoA	M_contig_3059	2	799	-	266	K01376	E3.4.22.-		2.08606	13.9746	5.32102	22.6455	118.738	124.504	6.69905		10.8556		56.92	AcPro
M1geoA	M_contig_308	1	741	+	247	K16264	czcD, zitB; cobalt-zinc-cadmium efflux system protein		4.49305	21.7383	9.55054	19.9534	51.1488	118.503	4.8382		4.44095		11.384	AcPro
M1geoA	M_contig_308	944	3280	+	779	K00936	E2.7.3.-		12.1093	19.6175	7.87338	7.73261	72.9806	145.336	1.62003		0.638567		6.02682	AcPro
M1geoA	M_contig_308	4962	5204	+	81	K00344	E1.6.5.5, qor; NADPH2:quinone reductase [EC:1.6.5.5]		13.701	20.3964	29.1233	47.3242	181.968	116.457	1.48868		3.45407		13.2813	AcPro
M1geoA	M_contig_310	5087	6148	-	354	K02394	flgI; flagellar P-ring protein precursor FlgI		337.01	296.353	161.264	150.051	35.6886	142.757	0.879359		0.445242		0.105898	SUC
M1geoA	M_contig_310	10104	11030	-	309	K04562	flhG, fleN; flagellar biosynthesis protein FlhG		197.534	126.982	100.772	65.5713	27.2573	152.208	0.642838		0.331949		0.137988	SUC
M1geoA	M_contig_310	16996	17787	-	264	K02419	fliP; flagellar biosynthetic protein FliP		92.4818	134.547	57.1875	8.29711	39.8793	143.357	1.45484		0.0897161	EET	0.431212
M1geoA	M_contig_310	17774	18190	-	139	K02418	fliOZ, fliO; flagellar protein FliO/FliZ		147.705	225.828	156.134	11.8189	75.7419	127.492	1.52891		0.080017	EET	0.512792
M1geoA	M_contig_310	18187	18486	-	100	K02417	fliNY, fliN; flagellar motor switch protein FliN/FliY		183.114	123.908	99.0774	5.47609	105.281	136.051	0.676672		0.0299054	EET	0.574949
M1geoA	M_contig_310	18479	19465	-	329	K02416	fliM; flagellar motor switch protein FliM		185.526	219.695	58.7954	16.6447	44.8005	159.58	1.18418		0.0897161	EET	0.241479
M1geoA	M_contig_310	19484	20020	-	179	K02415	fliL; flagellar FliL protein		229.396	228.434	129.151	21.4149	141.159	139.861	0.995805		0.0933532	EET	0.615351
M1geoA	M_contig_315	6200	6688	-	163	K13643	iscR; Rrf2 family transcriptional regulator, iron-sulfur cluster assembly transcription factor		68.0848	60.8138	34.7335	6.71913	142.097	141.895	0.893207		0.0986877	EET	2.08707
M1geoA	M_contig_315	9202	9504	-	101	K03530	hupB; DNA-binding protein HU-beta		659.277	752.445	672.661	113.859	1000.69	150.754	1.14132		0.172703	EET	1.51787
M1geoA	M_contig_315	11728	12048	-	107	K09160	K09160; hypothetical protein		10.3718	11.5802	0	0	59.0362	121.554	1.11651		ZERO		5.692	AcPro
M1geoA	M_contig_315	14853	15071	-	73				45.6075	45.2632	90.4816	30.006	317.286	122.853	0.992452		0.657918		6.95688	AcPro
M1geoA	M_contig_315	15335	15532	+	66				16.8149	12.516	7.14844	0	95.7102	138.458	0.744339		ZERO		5.692	AcPro
M1geoA	M_contig_315	15752	16507	+	252	K01069	E3.1.2.6, gloB; hydroxyacylglutathione hydrolase [EC:3.1.2.6]		19.8175	8.19498	7.48884	10.8653	233.958	141.546	0.413522		0.548265		11.8056	AcPro
M1geoA	M_contig_315	16860	18707	-	616	K03798	ftsH, hflB; cell division protease FtsH [EC:3.4.24.-]		11.7104	11.3985	9.95675	12.4457	68.3645	155.198	0.973366		1.06279		5.83794	AcPro
M1geoA	M_contig_315	18862	19044	+	61				63.676	94.7931	85.0781	125.681	759.406	122.04	1.48868		1.97375		11.9261	AcPro
M1geoA	M_contig_315	19049	19237	+	63				70.4624	131.12	59.9107	104.306	835.566	136.92	1.86085		1.48032		11.8583	AcPro
M1geoA	M_contig_315	20181	20777	-	199	K03272	gmhC, hldE, waaE, rfaE; D-beta-D-heptose 7-phosphate kinase / D-beta-D-heptose 1-phosphate adenosyltransferase [EC:2.7.1.167 2.7.7.70]		55.7679	39.4347	33.1917	8.25541	31.7431	146.271	0.707122		0.148032	EET	0.5692
M1geoA	M_contig_316	1867	3147	+	427	K13317	eryBIII; NDP-4-keto-2,6-dideoxyhexose 3-C-methyltransferase		77.9706	52.2329	44.1964	3.84737	182.455	145.35	0.669905		0.0493438	EET	2.34004
M1geoA	M_contig_317	1525	1881	-	119	K06204	dksA; DnaK suppressor protein		93.259	118.008	35.6821	4.60176	194.638	155.293	1.26538		0.0493438	EET	2.08707
M1geoA	M_contig_321	2708	3454	+	249				8.91391	13.2699	7.57907	4.39847	59.1943	136.536	1.48868		0.493438		6.64066	AcPro
M1geoA	M_contig_323	6128	6778	+	217	K03386	E1.11.1.15, PRDX, ahpC; peroxiredoxin (alkyl hydroperoxide reductase subunit C) [EC:1.11.1.15]		74.156	106.588	104.361	70.6592	378.43	139.381	1.43734		0.952847		5.10317	AcPro
M1geoA	M_contig_323	6922	7776	+	285	K02493	hemK, prmC; release factor glutamine methyltransferase [EC:2.1.1.-]		23.3638	44.9258	51.3183	13.45	147.763	140.809	1.92288		0.575678		6.32444	AcPro
M1geoA	M_contig_323	8415	9002	-	196				14.1554	42.1456	21.6641	16.7635	150.402	104.53	2.97736		1.18425		10.6251	AcPro
M1geoA	M_contig_323	9033	9497	-	155	K03564	BCP, PRXQ, DOT5; peroxiredoxin Q/BCP [EC:1.11.1.15]		21.4797	18.6528	18.2631	10.5989	122.262	125.929	0.868396		0.493438		5.692	AcPro
M1geoA	M_contig_323	9686	10057	+	124	K02572	napF; ferredoxin-type protein NapF		17.8997	53.2938	53.2674	30.9134	424.521	115.68	2.97736		1.72703		23.7167	AcPro
M1geoA	M_contig_323	11915	12799	+	295	K00020	E1.1.1.31, mmsB; 3-hydroxyisobutyrate dehydrogenase [EC:1.1.1.31]		31.9768	43.4028	31.9862	27.8445	171.305	134.04	1.35732		0.870774		5.35717	AcPro
M1geoA	M_contig_326	2639	2935	-	99	K03704	cspA; cold shock protein (beta-ribbon, CspA family)		128.914	108.472	42.8906	0	85.0758	157.076	0.841427		ZERO	EET	0.659942
M1geoA	M_contig_326	7535	8242	-	236				37.6197	36.7524	37.9836	44.0872	240.898	112.548	0.976945		1.17192		6.4035	AcPro
M1geoA	M_contig_328	3	740	-	246	K11103	dctA; aerobic C4-dicarboxylate transport protein		987.977	1124.91	301.106	37.8429	2199.78	138.725	1.1386		0.0383034	EET	2.22655
M1geoA	M_contig_328	4386	5018	+	211	K16138	uidR; TetR/AcrR family transcriptional regulator, repressor for uid operon		349.765	301.451	174.408	46.7155	9.97927	96.9293	0.861866		0.133562	EET	0.0285313	SUC
M1geoA	M_contig_33	1	198	+	66	K01990	ABC-2.A; ABC-2 type transport system ATP-binding protein		50.4446	12.516	7.14844	8.29711	0	98.921	0.248113		0.164479	EET	ZERO	SUC
M1geoA	M_contig_33	250	1773	-	508	K01874	MARS, metG; methionyl-tRNA synthetase [EC:6.1.1.10]		61.1691	47.9697	42.7218	8.62377	149.218	125.054	0.784214		0.140982	EET	2.43943
M1geoA	M_contig_33	3869	4537	-	223	K00943	E2.7.4.9, tmk; dTMP kinase [EC:2.7.4.9]		57.2309	68.5292	19.0411	0	103.865	131.745	1.19741		ZERO	EET	1.81484
M1geoA	M_contig_33	4701	5399	+	233	K03685	rnc, DROSHA, RNT1; ribonuclease III [EC:3.1.26.3]		11.9075	60.27	30.3732	11.7513	99.4072	121.904	5.06151	SP+	0.986877		8.34826	AcPro
M1geoA	M_contig_33	9338	10900	+	521	K01951	guaA, GMPS; GMP synthase (glutamine-hydrolysing) [EC:6.3.5.2]		73.4885	69.7627	50.7114	13.664	84.8717	132.26	0.949302		0.185933	EET	1.1549
M1geoA	M_contig_33	12865	13401	+	179				77.4988	73.8372	68.5292	9.17781	129.396	123.708	0.952754		0.118425	EET	1.66965
M1geoA	M_contig_33	15315	17252	-	646	K04079	htpG, HSP90A; molecular chaperone HtpG		24.91	53.0669	56.2359	44.08	234.683	142.53	2.13035		1.76957		9.42124	AcPro
M1geoA	M_contig_33	18224	18565	+	114				73.012	97.8222	70.3557	240.179	498.701	116.081	1.33981		3.28959		6.8304	AcPro
M1geoA	M_contig_33	22504	23646	+	381				68.4511	63.9596	45.8175	7.18647	66.3189	117.835	0.934383		0.104987	EET	0.96885
M1geoA	M_contig_33	23714	23980	-	89				12.4695	18.563	21.2044	12.3058	165.611	113.803	1.48868		0.986877		13.2813	AcPro
M1geoA	M_contig_33	25404	26678	+	425	K07403	nfeD; membrane-bound serine protease (ClpP class)		19.5844	17.4929	24.4224	16.7504	108.997	109.775	0.893207		0.855293		5.56551	AcPro
M1geoA	M_contig_33	26759	27526	+	256	K03364	CDH1; cell division cycle 20-like protein 1, cofactor of APC complex		26.0105	41.9481	38.7021	23.5301	148.052	114.68	1.61273		0.904637		5.692	AcPro
M1geoA	M_contig_33	31456	32424	+	323	K02523	ispB; octaprenyl-diphosphate synthase [EC:2.5.1.90]		91.0502	130.43	32.1348	8.47692	84.7465	145.357	1.4325		0.0931016	EET	0.930767
M1geoA	M_contig_33	32482	33006	+	175	K02199	ccmG, dsbE; cytochrome c biogenesis protein CcmG, thiol:disulfide interchange protein DsbE		85.6118	155.77	32.3518	6.25839	168.45	140.735	1.8195		0.073102	EET	1.9676
M1geoA	M_contig_33	33017	33760	+	248	K06196	ccdA; cytochrome c-type biogenesis protein		82.7862	71.6136	28.5361	2.2081	127.356	135.231	0.865043		0.0266723	EET	1.53838
M1geoA	M_contig_33	33757	34185	+	143				58.2054	129.974	23.095	0	73.6233	132.313	2.23302		ZERO	EET	1.26489
M1geoA	M_contig_33	34402	34938	+	179	K02825	pyrR; pyrimidine operon attenuation protein / uracil phosphoribosyltransferase [EC:2.4.2.9]		77.4988	99.2188	39.5361	3.05927	35.2898	128.614	1.28026		0.0394751	EET	0.45536
M1geoA	M_contig_33	34961	35893	+	311	K00609	pyrB, PYR2; aspartate carbamoyltransferase catalytic subunit [EC:2.1.3.2]		117.758	115.541	65.2324	10.5648	148.951	124.635	0.981174		0.0897161	EET	1.26489
M1geoA	M_contig_33	35984	37261	+	426	K01465	URA4, pyrC; dihydroorotase [EC:3.5.2.3]		127.651	74.6551	84.1703	17.9965	103.798	118.524	0.584838		0.140982	EET	0.813142
M1geoA	M_contig_33	37311	38432	+	374	K01956	carA, CPA1; carbamoyl-phosphate synthase small subunit [EC:6.3.5.5]		100.889	94.9741	99.6576	19.0345	106.97	124.196	0.94137		0.188668	EET	1.06027
M1geoA	M_contig_33	39389	39715	+	109	K09922	K09922; hypothetical protein		61.0889	34.1032	60.5978	5.02394	38.6353	113.52	0.558254		0.0822397	EET	0.632444
M1geoA	M_contig_33	43063	43539	+	159	K03624	greA; transcription elongation factor GreA		188.454	137.676	127.593	30.9967	264.859	137.085	0.730555		0.164479	EET	1.40543
M1geoA	M_contig_33	43575	43775	+	67				49.6917	80.1396	42.2505	0	282.845	116.384	1.61273		ZERO		5.692	AcPro
M1geoA	M_contig_33	43883	44416	+	178	K01975	ligT; 2'-5' RNA ligase [EC:6.5.1.-]		0	18.563	5.30109	0	59.1468	118.653	∞		∞		∞	AcPro
M1geoA	M_contig_33	53803	54321	+	173	K02652	pilB; type IV pilus assembly protein PilB		57.7343	85.9478	8.18145	0	85.1987	144.423	1.48868		ZERO	EET	1.4757
M1geoA	M_contig_332	6567	7853	+	429	K03147	thiC; thiamine biosynthesis protein ThiC		100.889	52.9522	31.893	10.2118	157.063	136.728	0.524854		0.101218	EET	1.55679
M1geoA	M_contig_332	17685	18329	+	215				10.3236	21.1316	30.7217	22.9232	58.7616	141.304	2.04693		2.22047		5.692	AcPro
M1geoA	M_contig_335	1	147	+	49	K01770	ispF; 2-C-methyl-D-erythritol 2,4-cyclodiphosphate synthase [EC:4.6.1.12]		11.3243	50.5747	9.62851	22.3514	85.9439	100.99	4.46603		1.97375		7.58933	AcPro
M1geoA	M_contig_335	4545	5078	+	178				9.3521	25.5241	26.5054	6.15291	59.1468	126.783	2.72924		0.657918		6.32444	AcPro
M1geoA	M_contig_335	5144	5347	+	68				8.16016	18.2218	34.6909	16.1062	123.86	112.198	2.23302		1.97375		15.1787	AcPro
M1geoA	M_contig_338	3558	5417	+	620	K01176	E3.2.1.1, amyA, malS; alpha-amylase [EC:3.2.1.1]		8.05487	23.9822	12.1754	16.7816	78.1119	102.457	2.97736		2.08341		9.69748	AcPro
M1geoA	M_contig_338	5524	6792	+	423	K00428	E1.11.1.5; cytochrome c peroxidase [EC:1.11.1.5]	imcG (1)	56.4074	100.572	69.1523	94.5046	378.316	119.611	1.78295		1.6754		6.70685	AcPro
M1geoA	M_contig_338	6916	7278	+	121				32.1011	58.0286	19.4957	63.3597	208.822	126.983	1.80768		1.97375		6.50514	AcPro
M1geoA	M_contig_338	7302	9734	+	811				19.842	31.0662	30.2509	26.3339	142.798	121.943	1.56568		1.32718		7.19678	AcPro
M1geoA	M_contig_338	13112	13588	+	159	K02482	K02482; two-component system, NtrC family, sensor kinase [EC:2.7.13.3]		27.919	23.3789	38.5746	24.1086	158.915	132.696	0.837381		0.863517		5.692	AcPro
M1geoA	M_contig_338	14966	15385	-	140	K01011	TST, MPST, sseA; thiosulfate/3-mercaptopyruvate sulfurtransferase [EC:2.8.1.1 2.8.1.2]		71.3431	14.751	0	0	120.321	119.429	0.206761		ZERO	EET	1.68652
M1geoA	M_contig_338	22111	23994	+	628	K01236	treZ, glgZ; maltooligosyltrehalose trehalohydrolase [EC:3.2.1.141]		10.603	20.3883	13.5228	19.1838	103.94	129.266	1.92288		1.80927		9.80288	AcPro
M1geoA	M_contig_35	5235	6323	+	363	K14170	pheA; chorismate mutase / prephenate dehydratase [EC:5.4.99.5 4.2.1.51]		62.6736	72.8202	11.6974	3.01713	81.2087	141.335	1.1619		0.0481403	EET	1.29574
M1geoA	M_contig_35	6335	7198	+	288	K04517	tyrA2; prephenate dehydrogenase [EC:1.3.1.12]		69.3614	45.8919	36.04	0	65.8008	132.134	0.661635		ZERO	EET	0.948666
M1geoA	M_contig_35	7214	8518	+	435	K00800	aroA; 3-phosphoshikimate 1-carboxyvinyltransferase [EC:2.5.1.19]		84.1904	72.1611	45.5528	10.071	91.9698	138.975	0.857118		0.119621	EET	1.0924
M1geoA	M_contig_35	10154	11890	+	579	K02945	RP-S1, rpsA; small subunit ribosomal protein S1		508.89	371.653	266.455	56.7471	705.512	145.473	0.730321		0.111511	EET	1.38637
M1geoA	M_contig_35	11914	12192	+	93	K05788	ihfB, himD; integration host factor subunit beta		650.356	426.351	344.97	70.6592	883.004	119.013	0.655565		0.108647	EET	1.35772
M1geoA	M_contig_352	7862	9319	-	486	K00343	nuoN; NADH-quinone oxidoreductase subunit N [EC:1.6.5.3]		280.871	281.3	275.7	73.2399	1408.08	105.142	1.00153		0.26076		5.01328	AcPro
M1geoA	M_contig_3534	2167	2355	+	63				123.309	78.6718	37.4442	17.3844	66.8453	106.25	0.638005		0.140982	EET	0.542095
M1geoA	M_contig_355	7744	8115	+	124	K03620	hyaC; Ni/Fe-hydrogenase 1 B-type cytochrome subunit		53.6991	29.9778	26.6337	26.4972	0	96.2609	0.558254		0.493438		ZERO	SUC
M1geoA	M_contig_358	5694	6899	-	402	K14652	ribBA; 3,4-dihydroxy 2-butanone 4-phosphate synthase / GTP cyclohydrolase II [EC:4.1.99.12 3.5.4.25]		92.4818	97.6059	59.8548	12.2599	178.088	140.955	1.05541		0.132566	EET	1.92565
M1geoA	M_contig_358	8721	9173	-	151	K07738	nrdR; transcriptional repressor NrdR		84.5198	92.9995	81.2366	10.8797	111.556	141.389	1.10033		0.128723	EET	1.31988
M1geoA	M_contig_358	9170	9304	-	45	K01493	comEB; dCMP deaminase [EC:3.5.4.12]		12.3309	64.2487	10.4844	12.1691	0	105.198	5.21037	SP+	0.986877		ZERO
M1geoA	M_contig_358	9368	9544	+	59				112.859	140.009	79.9656	9.28151	249.82	111.253	1.24057		0.0822397	EET	2.21355
M1geoA	M_contig_358	13209	13685	+	159				27.919	36.3672	2.96728	10.3322	145.672	144.453	1.30259		0.370079		5.21766	AcPro
M1geoA	M_contig_358	26622	27386	+	255	K00979	kdsB; 3-deoxy-manno-octulosonate cytidylyltransferase (CMP-KDO synthetase) [EC:2.7.7.38]		137.091	171.69	55.5055	6.44246	231.206	145.492	1.25238		0.0469941	EET	1.68652
M1geoA	M_contig_358	27543	29156	+	538	K01937	E6.3.4.2, pyrG; CTP synthase [EC:6.3.4.2]		155.741	161.219	94.7102	8.14289	227.001	142.761	1.03517		0.0522849	EET	1.45755
M1geoA	M_contig_358	29153	29971	+	273	K01627	kdsA; 2-dehydro-3-deoxyphosphooctonate aldolase (KDO 8-P synthase) [EC:2.5.1.55]		136.182	167.934	95.0507	24.0707	239.1	139.972	1.23316		0.176754	EET	1.75574
M1geoA	M_contig_36	8782	9822	+	347	K00428	E1.11.1.5; cytochrome c peroxidase [EC:1.11.1.5]	macA (2)	243.065	323.756	233.859	277.75	1935.72	139.749	1.33198		1.1427		7.9638	AcPro
M1geoA	M_contig_36	17470	18300	+	277	K02967	RP-S2, MRPS2, rpsB; small subunit ribosomal protein S2		721.158	486.09	226.531	63.2617	858.974	146.688	0.67404		0.0877224	EET	1.1911
M1geoA	M_contig_36	18342	18998	+	219	K02357	tsf, TSFM; elongation factor Ts		699.315	529.957	409.322	80.0159	903.784	153.324	0.757823		0.11442	EET	1.29239
M1geoA	M_contig_36	19084	19803	+	240	K09903	pyrH; uridylate kinase [EC:2.7.4.22]		175.716	170.374	114.018	25.0988	184.242	137.621	0.9696		0.142837	EET	1.04853
M1geoA	M_contig_36	19810	20367	+	186	K02838	frr, MRRF, RRF; ribosome recycling factor		193.914	148.779	91.3155	23.5531	226.411	154.877	0.767242		0.121462	EET	1.16759
M1geoA	M_contig_36	20367	21122	+	252	K00806	uppS; undecaprenyl diphosphate synthase [EC:2.5.1.31]		143.127	106.535	59.9107	10.8653	133.691	150.431	0.744339		0.0759136	EET	0.934071
M1geoA	M_contig_36	21256	22056	+	267	K00981	E2.7.7.41, CDS1, CDS2, cdsA; phosphatidate cytidylyltransferase [EC:2.7.7.41]		74.8168	69.6113	21.2044	8.20388	94.6348	145.074	0.930424		0.109653	EET	1.26489
M1geoA	M_contig_36	22061	23221	+	387	K00099	dxr; 1-deoxy-D-xylulose-5-phosphate reductoisomerase [EC:1.1.1.267]		61.6546	35.2194	26.8205	2.83002	38.0862	144.212	0.571237		0.0459012	EET	0.617736
M1geoA	M_contig_36	23223	24368	+	382	K11749	rseP; regulator of sigma E protease [EC:3.4.24.-]		59.5564	58.386	48.1677	2.86706	77.1695	137.708	0.980349		0.0481403	EET	1.29574
M1geoA	M_contig_36	25831	28122	-	764	K07180	prkA; serine protein kinase		18.8837	27.5712	23.4663	8.60119	110.242	155.793	1.46005		0.455482		5.83794	AcPro
M1geoA	M_contig_36	29821	31203	-	461	K09786	K09786; hypothetical protein		26.4807	34.9416	39.9134	21.3817	178.133	106.644	1.31951		0.807445		6.7269	AcPro
M1geoA	M_contig_365	11623	11838	+	72	K03215	rumA; 23S rRNA (uracil1939-C5)-methyltransferase [EC:2.1.1.190]		7.70682	17.2095	26.2109	0	58.4896	115.967	2.23302		ZERO		7.58933	AcPro
M1geoA	M_contig_368	2066	3151	-	362	K00412	CYTB, petB; ubiquinol-cytochrome c reductase cytochrome b subunit		15.3285	25.1011	15.6397	4.5382	93.0663	129.994	1.63755		0.296063		6.07146	AcPro
M1geoA	M_contig_368	3196	3615	-	140	K02636	petC; cytochrome b6-f complex iron-sulfur subunit [EC:1.10.9.1]		15.854	29.5019	23.5898	43.0264	195.522	115.757	1.86085		2.71391		12.3327	AcPro
M1geoA	M_contig_369	3	614	-	204	K07056	rsmI; 16S rRNA (cytidine1402-2'-O)-methyltransferase [EC:2.1.1.198]		5.44011	26.3204	13.8764	2.68436	51.6085	126.69	4.8382		0.493438		9.48666	AcPro
M1geoA	M_contig_369	8275	8640	+	122	K00936	E2.7.3.-		27.2897	57.553	61.875	17.9544	138.074	135.381	2.10896		0.657918		5.05955	AcPro
M1geoA	M_contig_372	2668	4224	+	519	K03320	amt, AMT, MEP; ammonium transporter, Amt family		6.41493	6.36651	9.99955	11.6064	97.37	91.1697	0.992452		1.80927		15.1787	AcPro
M1geoA	M_contig_372	6560	7033	-	158	K03642	rlpA; rare lipoprotein A		17.5598	67.9665	8.95817	6.93176	93.2872	125.438	3.87056		0.394751		5.31253	AcPro
M1geoA	M_contig_372	10876	11958	+	361	K00850	pfkA, PFK; 6-phosphofructokinase 1 [EC:2.7.1.11]		27.6677	50.3413	43.1282	16.6862	186.648	136.105	1.8195		0.603091		6.74607	AcPro
M1geoA	M_contig_378	4711	5673	+	321				34.5727	39.8874	30.8652	29.0011	190.228	129.025	1.15373		0.838845		5.50226	AcPro
M1geoA	M_contig_378	5678	5986	+	103	K01507	ppa; inorganic pyrophosphatase [EC:3.6.1.1]		16.1619	12.0299	18.3222	26.583	204.43	112.912	0.744339		1.64479		12.6489	AcPro
M1geoA	M_contig_378	6055	6552	+	166	K00532	E1.12.7.2; ferredoxin hydrogenase [EC:1.12.7.2]		43.4553	39.8098	39.7901	59.3793	279.059	116.824	0.91611		1.36644		6.42174	AcPro
M1geoA	M_contig_378	6549	6857	+	103	K06940	K06940		16.1619	64.1595	41.225	63.7991	143.101	110.631	3.96981		3.94751		8.85422	AcPro
M1geoA	M_contig_378	6857	6976	+	40				0	0	0	0	105.281	50.7641	∞		∞		∞	AcPro
M1geoA	M_contig_38	1947	2264	+	106				5.23482	3.89648	4.45091	20.6645	59.5932	129.523	0.744339		3.94751		11.384	AcPro
M1geoA	M_contig_382	6764	7546	+	261	K02066	ABC.X1.P; putative ABC transport system permease protein		10.6301	15.8248	9.03826	6.29436	56.4727	128.967	1.48868		0.592126		5.31253	AcPro
M1geoA	M_contig_382	8646	8936	+	97				62.9258	89.4182	24.3194	45.1636	347.32	115.749	1.42101		0.717729		5.51951	AcPro
M1geoA	M_contig_382	10762	11238	-	159				27.919	41.5625	17.8037	34.4408	211.887	143.771	1.48868		1.2336		7.58933	AcPro
M1geoA	M_contig_382	20113	20487	-	125	K00278	nadB; L-aspartate oxidase [EC:1.4.3.16]		97.6608	85.9096	105.683	39.4279	623.265	83.5543	0.879673		0.403722		6.38194	AcPro
M1geoA	M_contig_388	3059	3313	+	85				6.52813	4.85914	16.6517	6.44246	74.3162	128.519	0.744339		0.986877		11.384	AcPro
M1geoA	M_contig_3896	467	1300	-	278	K00599	E2.1.1.-		9.98006	25.2571	27.1538	19.6982	53.0193	113.219	2.53075		1.97375		5.31253	AcPro
M1geoA	M_contig_40	6962	7540	-	193	K00532	E1.12.7.2; ferredoxin hydrogenase [EC:1.12.7.2]		34.501	74.9013	19.5563	22.6988	185.47	142.26	2.17099		0.657918		5.37577	AcPro
M1geoA	M_contig_40	7693	9021	-	443	K01647	CS, gltA; citrate synthase [EC:2.3.3.1]		1174.92	2604.03	881.824	1333.79	17605.5	132.191	2.21635		1.13522		14.9845	AcPro
M1geoA	M_contig_40	10755	11759	+	335	K06041	E5.3.1.13; arabinose-5-phosphate isomerase [EC:5.3.1.13]		76.194	93.7017	35.2087	9.80792	138.28	138.861	1.22978		0.128723	EET	1.81484
M1geoA	M_contig_40	13510	14250	+	247	K06861	lptB; lipopolysaccharide export system ATP-binding protein [EC:3.6.3.-]		80.8748	83.6087	80.2246	15.5193	102.298	134.297	1.0338		0.191893	EET	1.26489
M1geoA	M_contig_40	17334	18194	+	287	K06958	K06958; UPF0042 nucleotide-binding protein		71.5365	90.6645	29.5901	13.3563	36.6834	152.583	1.26739		0.186706	EET	0.512792
M1geoA	M_contig_406	1	201	+	67				0	0	0	65.3862	188.563	68.448	∞		∞	OC	∞	AcPro
M1geoA	M_contig_406	450	1658	+	403				11.0152	7.17417	4.68285	58.4298	141.072	90.3316	0.651297		5.30446	OC	12.807	AcPro
M1geoA	M_contig_406	1764	3890	+	709	K01423	E3.4.-.-		17.2181	18.6416	14.6397	108.132	255.407	121.012	1.08267		6.28012	OC	14.8337	AcPro
M1geoA	M_contig_406	3946	4617	+	224				19.8175	31.3458	21.0624	114.9	225.603	134.938	1.58172		5.7979	OC	11.384	AcPro
M1geoA	M_contig_406	4769	5512	+	248				20.1372	19.9852	7.60963	30.9134	229.241	118.369	0.992452		1.53514		11.384	AcPro
M1geoA	M_contig_406	5532	6701	+	390	K06045	shc, sqhC; squalene-hopene/tetraprenyl-beta-curcumene cyclase [EC:5.4.99.17 4.2.1.129]		25.6104	26.4761	22.985	60.3774	167.37	133.239	1.0338		2.35754		6.53526	AcPro
M1geoA	M_contig_406	6735	7964	+	410	K01735	aroB; 3-dehydroquinate synthase [EC:4.2.3.4]		13.5339	13.096	16.1101	42.7402	87.3064	119.967	0.967641		3.15801		6.45093	AcPro
M1geoA	M_contig_406	7951	8232	+	94				11.8062	26.3634	20.0765	40.7794	89.6011	115.741	2.23302		3.45407		7.58933	AcPro
M1geoA	M_contig_406	8229	9032	+	268	K07051	K07051		6.21147	10.788	8.80218	14.3032	86.4249	124.953	1.73679		2.30271		13.9138	AcPro
M1geoA	M_contig_418	3712	5235	+	508	K13735	yeeJ; adhesin/invasin		64.446	75.6132	28.7908	6.46782	95.3334	127.661	1.17328		0.10036	EET	1.47928
M1geoA	M_contig_418	5457	6935	+	493	K04567	KARS, lysS; lysyl-tRNA synthetase, class II [EC:6.1.1.6]		165.454	225.364	109.097	22.2154	350.226	142.513	1.36209		0.134269	EET	2.11675
M1geoA	M_contig_418	6956	8218	+	421	K09808	ABC.LPT.P, lolC, lolE; lipoprotein-releasing system permease protein		89.6261	98.1062	73.9634	16.9095	105.031	146.701	1.09462		0.188668	EET	1.17188
M1geoA	M_contig_418	8249	8929	+	227	K09810	ABC.LPT.A, lolD; lipoprotein-releasing system ATP-binding protein [EC:3.6.3.-]		97.7782	101.892	91.4496	14.4742	148.414	139.197	1.04207		0.148032	EET	1.51787
M1geoA	M_contig_418	8926	11250	+	775	K07277	SAM50, TOB55, bamA; outer membrane protein insertion porin family		83.0547	93.7971	56.0069	12.0121	97.8097	156.842	1.12934		0.144628	EET	1.17765
M1geoA	M_contig_418	11281	11796	+	172	K06142	hlpA, ompH; outer membrane protein		254.863	228.125	96.0052	19.1026	355.018	152.576	0.895091		0.0749527	EET	1.39298
M1geoA	M_contig_418	11845	12885	+	347	K02536	lpxD; UDP-3-O-[3-hydroxymyristoyl] glucosamine N-acyltransferase [EC:2.3.1.191]		148.717	169.02	118.289	15.7812	151.702	134.471	1.13652		0.106116	EET	1.02007
M1geoA	M_contig_418	12904	13347	+	148	K02372	fabZ; 3-hydroxyacyl-[acyl-carrier-protein] dehydratase [EC:4.2.1.59]		183.714	226.049	95.6345	33.3006	441.043	132.633	1.23044		0.181263	EET	2.40071
M1geoA	M_contig_418	13399	14178	+	260	K00677	lpxA; UDP-N-acetylglucosamine acyltransferase [EC:2.3.1.129]		151.528	231.931	99.8032	23.1681	388.731	128.432	1.53061		0.152896	EET	2.56541
M1geoA	M_contig_418	14175	15128	+	318	K09949	K09949; hypothetical protein		55.8381	100.01	69.731	6.88817	105.943	140.274	1.79107		0.12336	EET	1.89733
M1geoA	M_contig_418	15957	16478	+	174	K13017	wbpE, wlbC; UDP-2-acetamido-2-deoxy-ribo-hexuluronate aminotransferase [EC:2.6.1.98]		111.616	83.0802	62.364	12.5887	133.114	113.425	0.744339		0.112786	EET	1.19261
M1geoA	M_contig_418	16471	17619	+	383	K00748	lpxB; lipid-A-disaccharide synthase [EC:2.4.1.182]		75.3377	73.3312	49.2738	7.14894	115.452	133.358	0.973366		0.094892	EET	1.53246
M1geoA	M_contig_42	1724	1849	-	42				13.2117	29.5019	0	13.0383	150.402	106.062	2.23302		0.986877		11.384	AcPro
M1geoA	M_contig_42	2609	3775	+	389	K00789	metK; S-adenosylmethionine synthetase [EC:2.5.1.6]		132.66	104.053	93.3891	22.5238	286.885	130.023	0.784357		0.169785	EET	2.16255
M1geoA	M_contig_42	5592	6692	+	367	K00133	asd; aspartate-semialdehyde dehydrogenase [EC:1.2.1.11]		140.613	111.416	96.4163	22.3818	321.294	136.996	0.792361		0.159174	EET	2.28496
M1geoA	M_contig_42	11012	11266	-	85	K02899	RP-L27, MRPL27, rpmA; large subunit ribosomal protein L27		332.935	286.689	194.269	38.6548	569.757	123.159	0.861098		0.116103	EET	1.71132
M1geoA	M_contig_42	11295	11603	-	103	K02888	RP-L21, MRPL21, rplU; large subunit ribosomal protein L21		673.412	312.778	210.705	79.7489	1267.46	130.379	0.464468		0.118425	EET	1.88215
M1geoA	M_contig_42	24034	24210	+	59				902.874	2730.18	679.707	111.378	571.017	147.324	3.02388		0.12336	EET	0.632444
M1geoA	M_contig_42	24310	25833	-	508	K08301	rng, cafA; ribonuclease G [EC:3.1.26.-]		86.2921	108.135	49.2229	3.23391	70.4638	165.406	1.25313		0.0374763	EET	0.816573
M1geoA	M_contig_424	17274	17879	+	202				13.7349	18.4022	28.0275	10.8437	83.3911	112.131	1.33981		0.789501		6.07146	AcPro
M1geoA	M_contig_424	19159	20241	+	361	K02067	ABC.X1.S; putative ABC transport system substrate-binding protein		15.3709	22.8824	24.8314	13.6523	87.4914	125.307	1.48868		0.888189		5.692	AcPro
M1geoA	M_contig_425	6499	7326	+	276	K04652	hypB; hydrogenase nickel incorporation protein HypB		166.869	203.521	126.496	19.8409	221.243	143.324	1.21964		0.118901	EET	1.32585
M1geoA	M_contig_425	11034	11714	+	227	K00936	E2.7.3.-		63.5558	78.2386	60.2736	9.6495	148.414	144.634	1.23102		0.151827	EET	2.33518
M1geoA	M_contig_43	4174	4617	+	148				3.74926	8.37217	9.56345	11.1002	71.136	138.122	2.23302		2.96063		18.9733	AcPro
M1geoA	M_contig_43	9125	9241	-	39				0	52.9522	0	14.0413	53.9904	76.2264	∞	SP+	∞		∞	AcPro
M1geoA	M_contig_432	3	308	-	102				16.3203	32.3943	37.0037	21.4749	123.86	112.356	1.9849		1.31584		7.58933	AcPro
M1geoA	M_contig_438	5814	5999	-	62				17.8997	39.9704	22.8289	17.6648	135.847	93.4116	2.23302		0.986877		7.58933	AcPro
M1geoA	M_contig_438	16306	17376	+	357	K00826	E2.6.1.42, ilvE; branched-chain amino acid aminotransferase [EC:2.6.1.42]		43.5209	143.46	190.305	81.2977	1857.9	88.2064	3.29636		1.86802		42.69	AcPro
M1geoA	M_contig_438	17522	18331	+	270	K03183	ubiE; ubiquinone/menaquinone biosynthesis methyltransferase [EC:2.1.1.163 2.1.1.201]		36.9927	114.73	136.297	79.0991	1411.55	76.5664	3.10141		2.13823		38.1575	AcPro
M1geoA	M_contig_438	18343	19089	-	249	K02334	dpo; DNA polymerase bacteriophage-type [EC:2.7.7.7]		26.7417	68.0085	70.1064	46.1839	811.807	96.2422	2.54316		1.72703		30.3573	AcPro
M1geoA	M_contig_452	3634	4461	-	276				152.796	154.137	76.9234	17.8568	160.211	147.889	1.00878		0.116867	EET	1.04853
M1geoA	M_contig_452	6751	7695	-	315				84.5548	103.585	41.9375	8.69221	93.5834	142.538	1.22506		0.1028	EET	1.10678
M1geoA	M_contig_452	8837	10915	-	693	K02355	fusA, GFM, EFG; elongation factor G		152.135	154.364	110.971	25.2864	252.189	144.192	1.01465		0.166211	EET	1.65767
M1geoA	M_contig_452	12831	13655	-	275	K00767	nadC, QPRT; nicotinate-nucleotide pyrophosphorylase (carboxylating) [EC:2.4.2.19]		115.014	120.153	37.7438	5.97392	176.107	136.287	1.04469		0.0519409	EET	1.53118
M1geoA	M_contig_452	13839	14867	+	343			omcV (12)	110.008	91.5162	53.6445	7.98264	208.721	143.693	0.831908		0.0725645	EET	1.89733
M1geoA	M_contig_47	7857	8960	-	368	K06442	tlyA; 23S rRNA (cytidine1920-2'-O)/16S rRNA (cytidine1409-2'-O)-methyltransferase [EC:2.1.1.226 2.1.1.227]		43.7278	112.236	79.4875	47.6182	223.151	128.794	2.56669		1.08897		5.10317	AcPro
M1geoA	M_contig_47	8960	9508	-	183	K00762	pyrE; orotate phosphoribosyltransferase [EC:2.4.2.10]		84.9014	72.2233	59.2969	11.9696	161.086	126.938	0.850673		0.140982	EET	1.89733
M1geoA	M_contig_47	17068	18162	-	365	K03442	mscS; small conductance mechanosensitive channel		63.8505	59.9738	49.1186	1.5003	69.226	133.528	0.939285		0.0234971	EET	1.08419
M1geoA	M_contig_47	18155	18583	-	143	K01756	purB, ADSL; adenylosuccinate lyase [EC:4.3.2.2]		69.8464	63.5426	56.0877	7.65887	132.522	122.112	0.909748		0.109653	EET	1.89733
M1geoA	M_contig_471	5998	6543	+	182	K07040	K07040; uncharacterized protein		67.0747	70.3508	23.3306	9.02652	80.9856	138.697	1.04884		0.134574	EET	1.20739
M1geoA	M_contig_471	6831	7847	+	339	K03621	plsX; glycerol-3-phosphate acyltransferase PlsX [EC:2.3.1.15]		180.053	148.641	55.6693	14.5383	316.775	140.419	0.82554		0.0807445	EET	1.75934
M1geoA	M_contig_471	7859	8842	+	328	K00648	fabH; 3-oxoacyl-[acyl-carrier-protein] synthase III [EC:2.3.1.180]		108.271	128.441	63.2898	6.67816	96.2938	134.67	1.18629		0.0616798	EET	0.889374
M1geoA	M_contig_471	8921	9841	+	307	K00645	fabD; [acyl-carrier-protein] S-malonyltransferase [EC:2.3.1.39]		139.175	123.774	84.5239	7.13497	144.033	134.605	0.88934		0.0512663	EET	1.03491
M1geoA	M_contig_471	9872	10609	+	246	K00059	fabG; 3-oxoacyl-[acyl-carrier protein] reductase [EC:1.1.1.100]		318.047	251.846	187.952	42.295	513.567	130.319	0.79185		0.132983	EET	1.61475
M1geoA	M_contig_471	10718	10951	+	78	K02078	acpP; acyl carrier protein		974.616	1202.01	308.483	91.2682	1430.75	124.532	1.23332		0.0936452	EET	1.46801
M1geoA	M_contig_471	11033	12268	+	412	K09458	fabF; 3-oxoacyl-[acyl-carrier-protein] synthase II [EC:2.3.1.179]		437.717	395.985	144.287	15.9498	659.286	125.511	0.904658		0.0364385	EET	1.50619
M1geoA	M_contig_471	12283	12729	+	149	K01808	rpiB; ribose 5-phosphate isomerase B [EC:5.3.1.6]		309.1	329.867	91.8262	22.0514	522.873	137.185	1.06718		0.0713405	EET	1.6916
M1geoA	M_contig_471	12823	14070	+	416	K00600	glyA, SHMT; glycine hydroxymethyltransferase [EC:2.1.2.1]		264.107	285.942	129.291	6.58184	420.113	135.635	1.08267		0.0249211	EET	1.59069
M1geoA	M_contig_471	15407	17134	+	576	K01881	PARS, proS; prolyl-tRNA synthetase [EC:6.1.1.15]	na (1)	65.508	62.3843	41.7737	9.5071	124.29	123.912	0.952316		0.145129	EET	1.89733
M1geoA	M_contig_473	286	738	+	151	K03574	MUTT, NUDT1, MTH1; 7,8-dihydro-8-oxoguanine triphosphatase [EC:3.6.1.-]		11.0243	16.4117	3.12448	0	69.7227	77.2397	1.48868		ZERO		6.32444	AcPro
M1geoA	M_contig_473	11106	11651	-	182	K00177	korG; 2-oxoglutarate ferredoxin oxidoreductase subunit gamma [EC:1.2.7.3]		1210.39	2133.22	1303.92	710.087	6941.62	133.038	1.76241		0.586657		5.73501	AcPro
M1geoA	M_contig_473	11676	12497	-	274	K00175	korB; 2-oxoglutarate ferredoxin oxidoreductase subunit beta [EC:1.2.7.3]		761.456	899.917	695.642	415.703	5225.64	125.786	1.18184		0.545932		6.86269	AcPro
M1geoA	M_contig_473	12500	13633	-	378	K00174	korA; 2-oxoglutarate ferredoxin oxidoreductase subunit alpha [EC:1.2.7.3]		1337.32	1625.88	996.016	383.906	8628.61	115.915	1.21578		0.287072		6.45218	AcPro
M1geoA	M_contig_473	13656	13949	-	98	K00176	korD; 2-oxoglutarate ferredoxin oxidoreductase subunit delta [EC:1.2.7.3]	na (1)	1370.24	1820.69	996.551	290.568	7412.66	136.618	1.32874		0.212056		5.40975	AcPro
M1geoA	M_contig_473	13970	14926	-	319	K00024	mdh; malate dehydrogenase [EC:1.1.1.37]		1448.98	2258.05	1283.76	597.392	9326.8	138.532	1.55838		0.412285		6.43681	AcPro
M1geoA	M_contig_475	13597	14343	-	249	K02556	motA; chemotaxis protein MotA		84.6822	76.3022	26.5267	8.79693	84.5633	151.429	0.901042		0.103882	EET	0.998596
M1geoA	M_contig_475	16602	16802	+	67	K03154	thiS; sulfur carrier protein		24.8459	61.6458	35.2087	16.3465	125.709	140.488	2.48113		0.657918		5.05955	AcPro
M1geoA	M_contig_475	16823	17605	+	261	K03149	thiG; thiamine biosynthesis ThiG		138.191	115.521	70.4984	23.0793	379.174	154.329	0.83595		0.16701	EET	2.74383
M1geoA	M_contig_475	17658	18299	+	214	K00788	thiE; thiamine-phosphate pyrophosphorylase [EC:2.5.1.3]		62.2308	57.901	22.0466	5.11784	137.751	138.525	0.930424		0.0822397	EET	2.21355
M1geoA	M_contig_475	26261	26533	-	91				54.8793	158.857	67.3996	6.01768	393.359	147.322	2.89465		0.109653	EET	7.1677	AcPro
M1geoA	M_contig_475	26629	26982	-	118	K09005	K09005; hypothetical protein		9.40493	24.5016	51.9776	4.64076	71.3771	129.659	2.60519		0.493438		7.58933	AcPro
M1geoA	M_contig_475	28935	29459	-	175	K03702	uvrB; excinuclease ABC subunit B		9.51242	16.5211	5.39196	3.12919	60.1607	117.556	1.73679		0.328959		6.32444	AcPro
[truncated: 4,273 more rows]

## Sheet: D3. SPL change
Supplementary Data 3. List of CDSs that showed a significant response (5-times change and mRNA-RPKM after/before stimulus over 50) to the given stimulus in SP-L community.
[truncated: 4,454 more rows]

[truncated: 6 more sheets:  D4. SPH marker, D5. SPM marker, D6. SPL marker,  D7. SPH cytC, D8.  SPM cytC, D9. SPL cytC]
